# Supplementary material for: Hsa_circ_0044301 Regulates Gastric Cancer Cell’s Proliferation, Migration, and Invasion by Modulating the Hsa-miR-188-5p/DAXX Axis and MAPK Pathway
Source: Cancers (Basel). 2022 Aug 29;14(17):4183. doi: 10.3390/cancers14174183 (PMC9454757; doi:10.3390/cancers14174183)
Supplement: Supplementary file 1 [file cancers-14-04183-s001.zip]

Archive with 11 entries (11 files):
- Figure S1.jpg
- Figure S2.jpg
- Figure S3.jpg
- Figure S4.jpg
- Figure S5.jpg
- Figure S6.jpg
- Figure S7.pdf
- Supplementary Table S1.xls
- Supplementary Table S2.xlsx
- Supplementary Table S3.xls
- Supplementary Table S4.xls
