# Supplementary material for: Hsa_circ_0044301 Regulates Gastric Cancer Cell’s Proliferation, Migration, and Invasion by Modulating the Hsa-miR-188-5p/DAXX Axis and MAPK Pathway
Source: Cancers (Basel). 2022 Aug 29;14(17):4183. doi: 10.3390/cancers14174183 (PMC9454757; doi:10.3390/cancers14174183)
Supplement: Supplementary file 1 [file cancers-14-04183-s001.zip › Supplementary Table S1.xls]

## Sheet: Table S1.1
Table S 1.1 The information of primers
Gene	Primer（5'- 3'）
hsa_circ_0000081（F）	CGGCAAGGAGGTGGTTTCTTC
hsa_circ_0000081（R）	TGTTCCATGATGAGGTAGGCAC
hsa_circ_0004662（F）	GTAAACCACGATCGTTATGCTGAGA
hsa_circ_0004662（R）	TGATATGACCACCACCATTGAACTT
hsa_circ_0008586（F）	CAGCAAGTTTTATGCGAAGGGAG
hsa_circ_0008586（R）	AAGCAGCCACTCGTACCTGTT
hsa_circ_0044301（F）	ACACAGACACTAACTAAACAGATCA
hsa_circ_0044301（R）	TCATCACAGACATTGGACCAGAATT
hsa_circ_404289（F）	TCCTCTCCCCAAATTATACATCTCA
hsa_circ_404289（R）	GGTGGAGACTTTACTCTTACCCGTC
hsa-miR-146a-3p(F)	ACATTGGCCCTCTGAAATTCAGT
hsa-miR-520f-3p(F)	ACGGCACAAGTGCTTCCTTTTA
hsa-miR-188-5p(F)	AAGCTGAGCATCCCTTGCATG
hsa-miR-127-5p(F)	AAGTTGCACTGAAGCTCAGAGG
hsa-miR-623(F)	ATACTCGATCCCTTGCAGGGG
DAXX(F)	CTCTCCAGGGTTCTGTCTCG
DAXX(R)	GGGATCTGTGGGAGGGTTAT
DHRS12(F)	ATCGCCAAGCGAGAACATTT
DHRS12(R)	ACACCCAGAGTATTGGCAGC
GAPDH(F)	GGGAAACTGTGGCGTGAT
GAPDH(R)	GAGTGGGTGTCGCTGTTGA
U6*
*The miRNA universal reverse primer and human U6 internal reference primer sequence for qRT-PCR are provided by Shanghai sangon Co. Ltd. (Shangai, China).

## Sheet: Table S1.2
Table S 1.2 Oligonucleotide sequences
Gene	Sequence
hsa_circ_0044301-siRNA-1	F: GACACUAACUAAACAGAUCTT
	R: GAUCUGUUUAGUUAGUGUCTT
hsa_circ_0044301-siRNA-2	F: CUAACUAAACAGAUCACAATT
	R: UUGUGAUCUGUUUAGUUAGTT
hsa_circ_0044301-siRNA-3	F: CUAAACAGAUCACAAUCGATT
	R: UCGAUUGUGAUCUGUUUAGTT
DAXX-siRNA1	CUACAGAUCUCCAAUGAAA
DAXX-siRNA2	GCUACAAGCUGGAGAAUGA
siRNA NC	F: UUCUCCGAACGUGUCACGUTT
	R: ACGUGACACGUUCGGAGAATT
hsa-miR-188-5p mimics	F: CAUCCCUUGCAUGGUGGAGGG
	R: CCCUCCACCAUGCAAGGGAUG
mimics NC	F: UCACAACCUCCUAGAAAGAGUAGA
	R: UCUACUCUUUCUAGGAGGUUGUGA

## Sheet: Table S1.3
		Table S1.3 RNA Quantification and Quality Assurance by NanoDrop ND-1000
		Sample ID	OD260/280 Ratio	OD260/230 Ratio	Conc. (ng/μl)	Volume (μl)	Quantity (ng)	QC Purity Pass or Fail
		G22N	1.96	2.32	877.01	40	35080.4	Pass
		G22T	1.96	2.17	702.09	40	28083.6	Pass
		G61N	1.97	2.34	715.89	70	50112.3	Pass
		G61T	1.99	2.31	946.98	70	66288.6	Pass
		G48N	2	2.3	1070.93	40	42837.2	Pass
		G48T	2.01	2.17	648.93	40	25957.2	Pass
		*For spectrophotometer, the O.D. A260 /A280 ratio should be close to 2.0 for pure RNA (ratios between 1.8 and 2.1 are acceptable). The O.D. A260/A230 ratio should be more than 1.8
