# Supplementary material for: Hsa_circ_0044301 Regulates Gastric Cancer Cell’s Proliferation, Migration, and Invasion by Modulating the Hsa-miR-188-5p/DAXX Axis and MAPK Pathway
Source: Cancers (Basel). 2022 Aug 29;14(17):4183. doi: 10.3390/cancers14174183 (PMC9454757; doi:10.3390/cancers14174183)
Supplement: Supplementary file 1 [file cancers-14-04183-s001.zip › Supplementary Table S2.xlsx]

## Sheet: Table S2.1
	Table S2.1 Details of 8 circRNA microarray results in GEO datasets
Number	Accession	Year	Platform	Organism	Samples Size		can get or not	content
					GC size	normal size
1	GSE122796	2018	GPL11154	Homo sapiens	3	3	no	gastric cancer(tissues)
2	GSE100170	2017	GPL23259	Homo sapiens	5	5	no	gastric cancer(tissues)
3	GSE116675	2018	GPL20301	Homo sapiens	24		no	Epstein Barr virus(gastric cancer and other disease)
4	GSE83521	2017	GPL19978	Homo sapiens	6	6	yes	3 stage gastric cancer(tissues)
5	GSE93541	2017	GPL19978	Homo sapiens	3	3	yes	gastric cancer(plasm)
6	GSE77661	2016	GPL11154	Homo sapiens	26		no	many cancers
7	GSE89143	2017	GPL19978	Homo sapiens	3	3	yes	gastric cancer(tissues)
8	GSE78092	2016	GPL21485	Homo sapiens	3	3	yes	gastric cancer(tissues)

## Sheet: Table S2.2
Table S2.2 Details of circRNA microarray results in GSE89143
ID	adj.P.Val	P.Value	t	logFC	SPOT_ID
ASCRP001986	0.0093	5.24e-06	-14.5536	-2.8968	hsa_circRNA_101637
ASCRP003740	0.0093	7.27e-06	-13.7832	-2.75262	hsa_circRNA_103442
ASCRP001942	0.0118	1.449e-05	-12.2801	-2.27912	hsa_circRNA_101592
ASCRP003503	0.0118	2.276e-05	-11.381	-2.4308	hsa_circRNA_103205
ASCRP003054	0.0118	2.625e-05	-11.1101	-2.14392	hsa_circRNA_102742
ASCRP002793	0.0118	2.773e-05	-11.0073	-3.01666	hsa_circRNA_102476
ASCRP004099	0.0139	4.063e-05	-10.3161	-4.26194	hsa_circRNA_103809
ASCRP000339	0.0139	4.469e-05	-10.1498	-2.42129	hsa_circRNA_001826
ASCRP003057	0.0139	5.285e-05	-9.86307	-2.20132	hsa_circRNA_102745
ASCRP004273	0.0139	5.636e-05	-9.75509	-1.83064	hsa_circRNA_103993
ASCRP000749	0.0139	5.996e-05	-9.6522	-1.75724	hsa_circRNA_100364
ASCRP000765	0.0147	7.437e-05	-9.3014	-1.74283	hsa_circRNA_100380
ASCRP000737	0.0147	7.478e-05	-9.29251	-1.86657	hsa_circRNA_100352
ASCRP002647	0.0159	8.704e-05	-9.05244	-2.06856	hsa_circRNA_102328
ASCRP002244	0.019	0.00012637	-8.48531	-1.63279	hsa_circRNA_101902
ASCRP004441	0.019	0.0001339	-8.40018	-1.60835	hsa_circRNA_104168
ASCRP004253	0.019	0.00013919	-8.34347	-1.78878	hsa_circRNA_103973
ASCRP000961	0.019	0.0001502	-8.23322	-1.93908	hsa_circRNA_100583
ASCRP003735	0.019	0.00015761	-8.1641	-1.56884	hsa_circRNA_103437
ASCRP002583	0.019	0.00016072	-8.13616	-1.86513	hsa_circRNA_102255
ASCRP004898	0.019	0.00016304	-8.11579	-1.5331	hsa_circRNA_104645
ASCRP003414	0.019	0.00017122	-8.04635	-1.49247	hsa_circRNA_103110
ASCRP000535	0.019	0.0001717	-8.04242	-3.18632	hsa_circRNA_100146
ASCRP002593	0.019	0.00017824	-7.98977	-1.52628	hsa_circRNA_102265
ASCRP001030	0.0197	0.00019313	-7.87777	-1.42873	hsa_circRNA_100656
ASCRP001424	0.0197	0.00020027	-7.82752	-1.43406	hsa_circRNA_101056
ASCRP004376	0.0221	0.00023285	-7.62182	-1.51065	hsa_circRNA_104103
ASCRP005325	0.0227	0.0002508	-7.52207	-1.8699	hsa_circRNA_400029
ASCRP003323	0.0227	0.00025737	-7.48767	-1.87355	hsa_circRNA_103017
ASCRP000381	0.0242	0.00028329	-7.36089	-1.33514	hsa_circRNA_002111
ASCRP005195	0.0246	0.00029839	-7.29306	-1.83606	hsa_circRNA_104948
ASCRP002369	0.0246	0.00031232	-7.23386	-2.81467	hsa_circRNA_102034
ASCRP001678	0.0246	0.00031716	-7.21402	-1.35791	hsa_circRNA_101319
ASCRP001348	0.0298	0.00039595	-6.93237	-1.62034	hsa_circRNA_100977
ASCRP000286	0.0306	0.00041841	-6.86371	-1.59488	hsa_circRNA_001506
ASCRP002736	0.0354	0.00051793	-6.60332	-2.07645	hsa_circRNA_102417
ASCRP004786	0.0354	0.00055946	-6.51113	-1.3578	hsa_circRNA_104532
ASCRP003415	0.0354	0.00056129	-6.50725	-1.38954	hsa_circRNA_103111
ASCRP000474	0.0354	0.00057627	-6.47603	-1.82845	hsa_circRNA_100084
ASCRP002872	0.0354	0.00057921	-6.47	-1.64244	hsa_circRNA_102559
ASCRP003023	0.0354	0.00060485	-6.41893	-1.35189	hsa_circRNA_102711
ASCRP000657	0.0354	0.00060591	-6.41686	-2.53246	hsa_circRNA_100269
ASCRP004521	0.0354	0.00060853	-6.41179	-1.36041	hsa_circRNA_104250
ASCRP000748	0.0354	0.00062558	-6.37941	-1.25998	hsa_circRNA_100363
ASCRP003808	0.0354	0.00063345	-6.36479	-2.46369	hsa_circRNA_103510
ASCRP001608	0.0354	0.00063687	-6.35851	-1.28285	hsa_circRNA_101245
ASCRP001128	0.0358	0.00065695	-6.32235	-1.50217	hsa_circRNA_100754
ASCRP000914	0.0364	0.00069767	-6.25278	-1.53492	hsa_circRNA_100533
ASCRP000766	0.0364	0.00069825	-6.25183	-1.225	hsa_circRNA_100381
ASCRP000634	0.0364	0.00071227	-6.22894	-1.27063	hsa_circRNA_100246
ASCRP000347	0.0365	0.00072733	-6.20496	-2.44883	hsa_circRNA_001886
ASCRP001987	0.0385	0.00079619	-6.102	-1.7407	hsa_circRNA_101638
ASCRP001719	0.0385	0.00080447	-6.09031	-1.24058	hsa_circRNA_101360
ASCRP001111	0.0385	0.00082137	-6.06686	-3.38206	hsa_circRNA_100737
ASCRP004819	0.0385	0.00082704	-6.05912	-1.74114	hsa_circRNA_104566
ASCRP001790	0.0385	0.00084188	-6.03914	-1.23566	hsa_circRNA_101431
ASCRP003858	0.0385	0.00087863	-5.99133	-1.4241	hsa_circRNA_103560
ASCRP003344	0.0385	0.00088195	-5.98713	-1.886	hsa_circRNA_103038
ASCRP000424	0.0385	0.0008873	-5.98038	-1.25843	hsa_circRNA_100034
ASCRP000314	0.0389	0.00091523	5.94593	1.07223	hsa_circRNA_001676
ASCRP005117	0.0389	0.00093179	-5.92606	-1.79572	hsa_circRNA_104870
ASCRP004093	0.0389	0.0009487	-5.90618	-1.53245	hsa_circRNA_103803
ASCRP000313	0.0389	0.00095693	-5.89666	-1.39966	hsa_circRNA_001671
ASCRP001453	0.0397	0.00099408	-5.85478	-1.21346	hsa_circRNA_101085
ASCRP001673	0.04	0.00102361	-5.82274	-1.12509	hsa_circRNA_101314
ASCRP000740	0.04	0.00103171	-5.81414	-1.17129	hsa_circRNA_100355
ASCRP004028	0.0412	0.00107907	-5.76532	-1.06919	hsa_circRNA_103737
ASCRP004828	0.0414	0.00111971	-5.72533	-1.44283	hsa_circRNA_104575
ASCRP001647	0.0414	0.00115292	-5.69386	-1.04795	hsa_circRNA_101287
ASCRP004246	0.0414	0.00115387	-5.69298	-1.07012	hsa_circRNA_103966
ASCRP001027	0.0414	0.00117457	-5.67389	-1.7059	hsa_circRNA_100653
ASCRP005051	0.0414	0.00118549	-5.66398	-1.01737	hsa_circRNA_104802
ASCRP000357	0.0414	0.00118895	-5.66086	-1.22199	hsa_circRNA_001959
ASCRP003809	0.0414	0.001197	-5.65365	-1.00012	hsa_circRNA_103511
ASCRP000601	0.0424	0.00125811	-5.60059	-1.36961	hsa_circRNA_100213
ASCRP000285	0.0424	0.00126723	-5.59292	-1.08174	hsa_circRNA_001503
ASCRP001631	0.0424	0.00129156	-5.57277	-1.0402	hsa_circRNA_101270
ASCRP005014	0.0424	0.0013049	-5.56191	-1.03198	hsa_circRNA_104764
ASCRP003812	0.0424	0.00133452	-5.53822	-1.19239	hsa_circRNA_103514
ASCRP004636	0.0424	0.00135765	-5.52015	-1.09482	hsa_circRNA_104374
ASCRP003049	0.0424	0.00135908	-5.51904	-1.05432	hsa_circRNA_102737
ASCRP001652	0.0424	0.00136688	-5.51303	-1.24363	hsa_circRNA_101292
ASCRP001821	0.0424	0.00137522	-5.50665	-1.05174	hsa_circRNA_101470
ASCRP004027	0.0434	0.00142679	-5.46811	-1.28715	hsa_circRNA_103736
ASCRP005381	0.0441	0.00146438	-5.44101	-1.60581	hsa_circRNA_400087
ASCRP002797	0.0443	0.00148776	-5.42455	-1.16903	hsa_circRNA_102480
ASCRP005356	0.0445	0.00151198	-5.4078	-1.08552	hsa_circRNA_400062
ASCRP003552	0.0453	0.00162728	-5.33205	-1.12995	hsa_circRNA_103254
ASCRP003989	0.0453	0.00164071	-5.32363	-1.11911	hsa_circRNA_103695
ASCRP000593	0.0453	0.00164692	-5.31975	-1.07245	hsa_circRNA_100204
ASCRP004167	0.0453	0.00165316	-5.31588	-1.62773	hsa_circRNA_103887
ASCRP005004	0.0453	0.00165433	-5.31516	-1.08848	hsa_circRNA_104754
ASCRP001434	0.0453	0.00165528	-5.31457	-1.98243	hsa_circRNA_101066
ASCRP001967	0.0453	0.00166383	-5.3093	-0.996516	hsa_circRNA_101618
ASCRP003789	0.0453	0.0016821	-5.29814	-1.11464	hsa_circRNA_103491
ASCRP000736	0.0455	0.00170725	-5.28299	-1.06367	hsa_circRNA_100351
ASCRP003433	0.0472	0.00179102	-5.23432	-0.971257	hsa_circRNA_103129
ASCRP003857	0.0479	0.00184132	-5.20632	-1.53582	hsa_circRNA_103559
ASCRP001328	0.0479	0.00185235	-5.2003	-1.55399	hsa_circRNA_100956
ASCRP000658	0.048	0.00187646	-5.18727	-1.10136	hsa_circRNA_100270
ASCRP001977	0.0499	0.00196918	-5.13887	-1.11817	hsa_circRNA_101628
ASCRP003791	0.0499	0.00200458	-5.12107	-1.00874	hsa_circRNA_103493
ASCRP000427	0.0499	0.00200911	-5.11882	-1.04108	hsa_circRNA_100037
ASCRP005061	0.0564	0.00229407	-4.98763	-1.28411	hsa_circRNA_104812
ASCRP003811	0.0577	0.00236947	-4.95598	-0.905889	hsa_circRNA_103513
ASCRP003202	0.0577	0.00239239	-4.94659	-1.05604	hsa_circRNA_102894
ASCRP003302	0.0578	0.00242057	-4.93518	-1.36125	hsa_circRNA_102995
ASCRP002331	0.0578	0.00243868	-4.92792	-1.00817	hsa_circRNA_101994
ASCRP004158	0.0582	0.00248141	-4.91104	-0.913912	hsa_circRNA_103870
ASCRP000627	0.0587	0.002554	-4.8831	-1.12747	hsa_circRNA_100239
ASCRP000443	0.0587	0.0025571	-4.88193	-1.53333	hsa_circRNA_100053
ASCRP002193	0.0587	0.00256844	-4.87765	-1.29839	hsa_circRNA_101850
ASCRP000885	0.0597	0.0026364	-4.85245	-0.858027	hsa_circRNA_100503
ASCRP001182	0.0605	0.00269814	-4.83019	-0.930131	hsa_circRNA_100808
ASCRP001596	0.061	0.00274057	-4.81522	-0.971195	hsa_circRNA_101233
ASCRP004604	0.061	0.00278162	-4.80098	-1.06557	hsa_circRNA_104341
ASCRP004952	0.061	0.00279116	-4.7977	-1.74204	hsa_circRNA_104700
ASCRP002114	0.0619	0.00286232	-4.77367	-0.954879	hsa_circRNA_101768
ASCRP003562	0.0619	0.00287787	-4.7685	-0.868147	hsa_circRNA_103264
ASCRP003406	0.0621	0.00291225	-4.7572	-1.23215	hsa_circRNA_103102
ASCRP002734	0.0624	0.00295638	-4.74291	-0.980158	hsa_circRNA_102415
ASCRP002075	0.0624	0.00302099	-4.72241	-1.60376	hsa_circRNA_101728
ASCRP003786	0.0624	0.00303214	-4.71892	-1.13312	hsa_circRNA_103488
ASCRP001094	0.0624	0.0030557	-4.7116	-0.957523	hsa_circRNA_100720
ASCRP000067	0.0624	0.00307497	-4.70566	-0.877348	hsa_circRNA_000571
ASCRP000189	0.0624	0.00308695	-4.70199	-1.21785	hsa_circRNA_001059
ASCRP002297	0.0624	0.00310287	-4.69713	-1.37372	hsa_circRNA_101957
ASCRP003528	0.0624	0.00312329	-4.69095	-1.3582	hsa_circRNA_103230
ASCRP003788	0.0646	0.00327435	-4.64654	-0.856678	hsa_circRNA_103490
ASCRP003339	0.0646	0.00329301	-4.64122	-0.862651	hsa_circRNA_103033
ASCRP003790	0.0646	0.0033087	-4.63677	-0.847139	hsa_circRNA_103492
ASCRP002124	0.0646	0.00334618	-4.62623	-0.98537	hsa_circRNA_101778
ASCRP002245	0.0646	0.00338213	-4.61625	-0.882316	hsa_circRNA_101903
ASCRP001342	0.0646	0.00338642	-4.61507	-1.1404	hsa_circRNA_100970
ASCRP003610	0.0668	0.00352332	-4.57817	-1.00544	hsa_circRNA_103312
ASCRP002592	0.0708	0.00376541	-4.5167	-1.20153	hsa_circRNA_102264
ASCRP004917	0.0719	0.0038489	-4.49652	-1.10929	hsa_circRNA_104664
ASCRP001567	0.0723	0.00389814	-4.48485	-0.8119	hsa_circRNA_101204
ASCRP001677	0.0724	0.00396188	-4.46998	-0.941382	hsa_circRNA_101318
ASCRP000441	0.0724	0.00397658	-4.46659	-0.91226	hsa_circRNA_100051
ASCRP001906	0.0724	0.00399453	-4.46247	-1.79121	hsa_circRNA_101555
ASCRP000684	0.0724	0.00402078	-4.45648	-0.838851	hsa_circRNA_100297
ASCRP004505	0.074	0.0041455	-4.42862	-0.929488	hsa_circRNA_104233
ASCRP004159	0.074	0.00417935	-4.42122	-0.89569	hsa_circRNA_103871
ASCRP002733	0.074	0.00422539	-4.41126	-1.28782	hsa_circRNA_102414
ASCRP003071	0.074	0.00425161	-4.40564	-0.821032	hsa_circRNA_102760
ASCRP004960	0.074	0.004281	-4.39939	-0.798509	hsa_circRNA_104708
ASCRP002942	0.074	0.00428537	-4.39846	-0.968884	hsa_circRNA_102629
ASCRP000368	0.074	0.00431224	-4.3928	-0.792649	hsa_circRNA_002011
ASCRP004953	0.0756	0.0044482	-4.36472	-0.925092	hsa_circRNA_104701
ASCRP001813	0.0756	0.00446471	-4.36137	-0.982077	hsa_circRNA_101462
ASCRP004119	0.0759	0.00453613	-4.34707	-0.83715	hsa_circRNA_103829
ASCRP000581	0.0759	0.00455035	-4.34425	-0.814072	hsa_circRNA_100192
ASCRP005293	0.0759	0.00457015	-4.34034	-0.933373	hsa_circRNA_105049
ASCRP005177	0.0769	0.0046709	-4.32074	-0.809464	hsa_circRNA_104930
ASCRP000350	0.0769	0.0047055	-4.31412	-1.17872	hsa_circRNA_001914
ASCRP002354	0.0769	0.00473803	-4.30795	-0.826453	hsa_circRNA_102018
ASCRP000423	0.0769	0.00477004	-4.30192	-0.852709	hsa_circRNA_100033
ASCRP004265	0.0769	0.00477862	-4.30031	-1.79255	hsa_circRNA_103985
ASCRP001109	0.0777	0.00486163	-4.28491	-0.843158	hsa_circRNA_100735
ASCRP004852	0.0785	0.00497398	-4.26453	-1.27594	hsa_circRNA_104599
ASCRP001655	0.0785	0.00498815	-4.26199	-0.856041	hsa_circRNA_101295
ASCRP002183	0.0785	0.00500314	-4.25932	-0.814294	hsa_circRNA_101839
ASCRP003140	0.08	0.00512872	-4.23728	-1.00874	hsa_circRNA_102831
ASCRP005178	0.0817	0.00526865	-4.21342	-1.11144	hsa_circRNA_104931
ASCRP002851	0.0831	0.00542242	-4.18801	-1.12717	hsa_circRNA_102538
ASCRP000479	0.0831	0.0054271	-4.18725	-0.793192	hsa_circRNA_100089
ASCRP002957	0.0832	0.00547593	-4.17936	-1.26997	hsa_circRNA_102644
ASCRP002897	0.0832	0.00550669	-4.17442	-0.82932	hsa_circRNA_102584
ASCRP001595	0.0832	0.0055268	-4.17121	-0.90975	hsa_circRNA_101232
ASCRP005277	0.084	0.00561625	-4.1571	-0.902074	hsa_circRNA_105030
ASCRP001784	0.0847	0.00569308	-4.14517	-0.801737	hsa_circRNA_101425
ASCRP001224	0.0853	0.00576594	-4.13403	-1.03992	hsa_circRNA_100850
ASCRP005294	0.0857	0.00588476	-4.11619	-0.887861	hsa_circRNA_105050
ASCRP000017	0.0857	0.00588838	-4.11565	-3.2994	hsa_circRNA_000166
ASCRP000994	0.0857	0.00592632	-4.11005	-0.793132	hsa_circRNA_100620
ASCRP004872	0.0857	0.00593185	-4.10923	-0.73459	hsa_circRNA_104619
ASCRP000182	0.0863	0.00600776	-4.09814	-1.55376	hsa_circRNA_001040
ASCRP004969	0.0864	0.00607354	-4.08866	-1.19821	hsa_circRNA_104718
ASCRP002432	0.0864	0.00608061	-4.08764	-1.29254	hsa_circRNA_102097
ASCRP003502	0.087	0.00618284	-4.07315	-0.759951	hsa_circRNA_103204
ASCRP004272	0.087	0.00618984	-4.07217	-1.12264	hsa_circRNA_103992
ASCRP000406	0.0879	0.00628915	4.05835	0.757534	hsa_circRNA_100016
ASCRP000618	0.0879	0.00632579	-4.05332	-1.22994	hsa_circRNA_100230
ASCRP001470	0.0882	0.00637882	-4.04609	-0.847704	hsa_circRNA_101102
ASCRP000005	0.09	0.00654776	-4.0235	-1.23843	hsa_circRNA_000041
ASCRP004231	0.0921	0.00673515	-3.99918	-0.73481	hsa_circRNA_103951
ASCRP002215	0.0922	0.00677778	-3.99376	-0.814221	hsa_circRNA_101873
ASCRP004399	0.0923	0.00681984	-3.98844	-1.11115	hsa_circRNA_104126
ASCRP004903	0.0924	0.00686193	-3.98316	-0.760488	hsa_circRNA_104650
ASCRP000742	0.0938	0.00703914	-3.9613	-0.881433	hsa_circRNA_100357
ASCRP001930	0.0938	0.00705336	-3.95958	-0.808692	hsa_circRNA_101580
ASCRP001385	0.0938	0.00708642	-3.95557	-0.971725	hsa_circRNA_101015
ASCRP003025	0.0938	0.00711587	-3.95203	-0.876323	hsa_circRNA_102713
ASCRP004716	0.0941	0.0071698	-3.94557	-0.921255	hsa_circRNA_104462
ASCRP000531	0.0947	0.00725566	-3.93541	-0.979328	hsa_circRNA_100141
ASCRP000383	0.0954	0.00734983	-3.92442	-1.05007	hsa_circRNA_002117
ASCRP005196	0.0968	0.0074908	-3.90825	-1.04532	hsa_circRNA_104949
ASCRP003884	0.097	0.00756698	-3.89966	-1.06595	hsa_circRNA_103589
ASCRP002433	0.097	0.00762398	-3.89329	-1.24972	hsa_circRNA_102098
ASCRP003517	0.097	0.00764295	-3.89118	-3.47908	hsa_circRNA_103219
ASCRP000390	0.097	0.00765707	-3.88961	-2.10786	hsa_circRNA_002178
ASCRP002784	0.0982	0.00780883	-3.87299	-0.726287	hsa_circRNA_102467
ASCRP003748	0.0982	0.00786949	-3.86644	-0.84482	hsa_circRNA_103450
ASCRP005206	0.0982	0.0079245	-3.86055	-1.05375	hsa_circRNA_104959
ASCRP001767	0.0982	0.00793196	-3.85976	-0.855498	hsa_circRNA_101408
ASCRP001931	0.0982	0.0079632	-3.85644	-0.717273	hsa_circRNA_101581
ASCRP000018	0.0982	0.00799667	-3.8529	-2.69514	hsa_circRNA_000167
ASCRP002368	0.0982	0.00802026	-3.85041	-1.07512	hsa_circRNA_102033
ASCRP004827	0.0985	0.00808432	-3.8437	-1.18183	hsa_circRNA_104574
ASCRP001145	0.0986	0.00813687	-3.83824	-0.708761	hsa_circRNA_100771
ASCRP004936	0.0989	0.0082342	3.82823	0.881218	hsa_circRNA_104683
ASCRP003024	0.0989	0.0082552	-3.82609	-0.852878	hsa_circRNA_102712
ASCRP002743	0.0989	0.0082739	-3.82419	-0.753007	hsa_circRNA_102424
ASCRP001697	0.0992	0.00838736	-3.81274	-0.746218	hsa_circRNA_101338
ASCRP001444	0.0992	0.00838924	-3.81255	-0.855129	hsa_circRNA_101076
ASCRP000389	0.0992	0.00844534	-3.80696	-3.7267	hsa_circRNA_002172
ASCRP002796	0.0992	0.00845207	-3.80629	-0.859985	hsa_circRNA_102479
ASCRP002573	0.1003	0.00859714	-3.79203	-0.838173	hsa_circRNA_102245
ASCRP002773	0.1003	0.00865277	-3.78663	-1.10815	hsa_circRNA_102455
ASCRP001820	0.1003	0.00866544	-3.7854	-0.877914	hsa_circRNA_101469
ASCRP003550	0.1007	0.00874004	-3.77824	-1.75097	hsa_circRNA_103252
ASCRP001180	0.1009	0.00879528	-3.77297	-0.782279	hsa_circRNA_100806
ASCRP003810	0.1011	0.00885208	-3.76759	-0.715211	hsa_circRNA_103512
ASCRP003273	0.1015	0.00892895	-3.76038	-0.788221	hsa_circRNA_102966
ASCRP001382	0.1049	0.00926882	-3.72928	-0.688708	hsa_circRNA_101011
ASCRP001437	0.1058	0.00938622	-3.71884	-0.822823	hsa_circRNA_101069
ASCRP001939	0.1081	0.00963218	-3.69741	-0.907096	hsa_circRNA_101589
ASCRP003870	0.1084	0.00972595	-3.6894	-1.17598	hsa_circRNA_103572
ASCRP000939	0.1084	0.0097433	-3.68792	-0.884432	hsa_circRNA_100559
ASCRP002525	0.1089	0.00984452	-3.67939	-1.10112	hsa_circRNA_102197
ASCRP000259	0.1089	0.00987481	-3.67685	-1.13498	hsa_circRNA_001379
ASCRP002800	0.1096	0.0100101	-3.66563	-0.671546	hsa_circRNA_102483
ASCRP004103	0.1096	0.0100243	-3.66446	-0.706693	hsa_circRNA_103813
ASCRP002761	0.1107	0.0102007	-3.6501	-1.19608	hsa_circRNA_102442
ASCRP002257	0.1107	0.0102137	-3.64905	-0.668536	hsa_circRNA_101915
ASCRP001835	0.1141	0.0105708	-3.62085	-0.849063	hsa_circRNA_101484
ASCRP002648	0.1143	0.0106336	-3.61599	-1.02517	hsa_circRNA_102329
ASCRP003752	0.1145	0.0107519	-3.60694	-0.920264	hsa_circRNA_103454
ASCRP003663	0.1145	0.0108419	-3.60012	-0.709132	hsa_circRNA_103365
ASCRP002389	0.1145	0.0108699	-3.59802	-0.822441	hsa_circRNA_102054
ASCRP003082	0.1145	0.0108724	-3.59783	-0.783323	hsa_circRNA_102771
ASCRP005184	0.1145	0.0109029	-3.59554	-1.03034	hsa_circRNA_104937
ASCRP001380	0.1145	0.0109204	-3.59423	-0.752205	hsa_circRNA_101009
ASCRP000861	0.1173	0.0112522	-3.56983	-0.705699	hsa_circRNA_100478
ASCRP002740	0.1173	0.0112781	-3.56795	-0.774493	hsa_circRNA_102421
ASCRP002814	0.1184	0.011468	-3.55438	-0.708771	hsa_circRNA_102499
ASCRP000428	0.1184	0.0114995	-3.55215	-0.739352	hsa_circRNA_100038
ASCRP000596	0.1184	0.0115248	-3.55036	-1.58913	hsa_circRNA_100207
ASCRP002356	0.1195	0.0117189	-3.53681	-0.701879	hsa_circRNA_102020
ASCRP000343	0.1195	0.0117225	-3.53656	-2.77166	hsa_circRNA_001846
ASCRP001635	0.1208	0.0118972	-3.52457	-0.760332	hsa_circRNA_101274
ASCRP005197	0.1215	0.0120164	3.5165	0.870391	hsa_circRNA_104950
ASCRP002394	0.1215	0.0120618	-3.51346	-0.692526	hsa_circRNA_102059
ASCRP004179	0.1216	0.0121569	-3.50711	-0.932836	hsa_circRNA_103899
ASCRP002305	0.1216	0.012172	-3.50611	-0.796304	hsa_circRNA_101965
ASCRP004983	0.1218	0.0122416	-3.5015	-0.746343	hsa_circRNA_104733
ASCRP005176	0.1264	0.0127512	-3.46864	-0.889825	hsa_circRNA_104929
ASCRP002265	0.1265	0.012806	-3.4652	-1.4092	hsa_circRNA_101923
ASCRP003900	0.1274	0.0129474	-3.45638	-0.710409	hsa_circRNA_103605
ASCRP000526	0.1279	0.0130535	-3.44983	-0.831352	hsa_circRNA_100136
ASCRP001205	0.1279	0.0131009	-3.44692	-0.850359	hsa_circRNA_100831
ASCRP001861	0.1295	0.0133124	-3.43409	-0.993694	hsa_circRNA_101510
ASCRP002831	0.13	0.0134614	-3.42518	-0.983422	hsa_circRNA_102517
ASCRP002404	0.13	0.0135217	-3.42161	-0.723375	hsa_circRNA_102069
ASCRP000462	0.13	0.0135298	-3.42113	-0.931645	hsa_circRNA_100072
ASCRP002113	0.13	0.0135669	-3.41894	-0.822796	hsa_circRNA_101767
ASCRP002704	0.1317	0.0138006	-3.4053	-0.889681	hsa_circRNA_102385
ASCRP000577	0.1321	0.0138946	-3.39989	-0.798985	hsa_circRNA_100188
ASCRP004853	0.1329	0.0140239	3.3925	1.71675	hsa_circRNA_104600
ASCRP001985	0.1332	0.0141147	-3.38736	-0.625662	hsa_circRNA_101636
ASCRP002057	0.1336	0.0142615	-3.37913	-0.767793	hsa_circRNA_101710
ASCRP005198	0.1336	0.0143075	3.37657	0.737495	hsa_circRNA_104951
ASCRP001476	0.1336	0.0143431	-3.3746	-0.704097	hsa_circRNA_101109
ASCRP000950	0.1336	0.0143744	-3.37286	-1.9042	hsa_circRNA_100571
ASCRP001053	0.1336	0.0144334	-3.36961	-0.7641	hsa_circRNA_100679
ASCRP002248	0.1336	0.0145167	-3.36504	-0.768673	hsa_circRNA_101906
ASCRP005158	0.1336	0.0145179	-3.36497	-0.863731	hsa_circRNA_104911
ASCRP002616	0.1374	0.0149855	-3.33984	-1.65935	hsa_circRNA_102297
ASCRP005210	0.1393	0.0152519	-3.3259	-0.642869	hsa_circRNA_104963
ASCRP002268	0.1394	0.015311	-3.32284	-0.942721	hsa_circRNA_101926
ASCRP004527	0.1394	0.0153633	-3.32015	-0.743377	hsa_circRNA_104256
ASCRP003329	0.1401	0.0155391	-3.31117	-0.777904	hsa_circRNA_103023
ASCRP002267	0.1401	0.0155961	-3.30828	-0.826943	hsa_circRNA_101925
ASCRP002595	0.1401	0.0156347	-3.30633	-0.731035	hsa_circRNA_102267
ASCRP001347	0.1401	0.0156686	-3.30462	-0.755286	hsa_circRNA_100976
ASCRP001625	0.1424	0.0159745	-3.28939	-0.71225	hsa_circRNA_101263
ASCRP003706	0.1437	0.0161902	-3.27885	-1.29172	hsa_circRNA_103408
ASCRP004480	0.1437	0.0162404	-3.27641	-0.676934	hsa_circRNA_104207
ASCRP001065	0.1437	0.0163262	-3.27228	-0.718831	hsa_circRNA_100691
ASCRP000770	0.1437	0.0163418	-3.27152	-0.760668	hsa_circRNA_100385
ASCRP001165	0.1438	0.0164099	-3.26826	-1.01601	hsa_circRNA_100791
ASCRP003785	0.1473	0.0168671	-3.24671	-0.719466	hsa_circRNA_103487
ASCRP004902	0.1501	0.017305	-3.22667	-0.898258	hsa_circRNA_104649
ASCRP002712	0.1501	0.0173135	-3.22628	-0.840824	hsa_circRNA_102393
ASCRP003941	0.151	0.0174759	-3.21899	-1.13939	hsa_circRNA_103647
ASCRP005186	0.1518	0.0176284	-3.21221	-0.886471	hsa_circRNA_104939
ASCRP000972	0.1522	0.0177299	-3.20774	-0.608859	hsa_circRNA_100597
ASCRP000636	0.1537	0.0180044	-3.19577	-0.771502	hsa_circRNA_100248
ASCRP005185	0.1537	0.0180714	-3.19288	-0.826126	hsa_circRNA_104938
ASCRP001814	0.1537	0.0180867	-3.19222	-0.951013	hsa_circRNA_101463
ASCRP000063	0.1537	0.0181596	-3.18909	-1.00702	hsa_circRNA_000552
ASCRP004010	0.1537	0.0182116	-3.18687	-0.648035	hsa_circRNA_103719
ASCRP002859	0.1549	0.018408	-3.17853	-0.860732	hsa_circRNA_102546
ASCRP004665	0.1551	0.0185294	-3.17342	-1.13611	hsa_circRNA_104405
ASCRP002171	0.1551	0.0185589	-3.17219	-0.649135	hsa_circRNA_101827
ASCRP004661	0.1564	0.0187709	-3.16337	-0.995225	hsa_circRNA_104401
ASCRP000071	0.1568	0.0189348	-3.15663	-2.75184	hsa_circRNA_000585
ASCRP002539	0.1568	0.0189468	-3.15614	-0.839261	hsa_circRNA_102211
ASCRP002730	0.1571	0.0190413	-3.15229	-0.939145	hsa_circRNA_102411
ASCRP004909	0.1573	0.019119	-3.14913	-0.574105	hsa_circRNA_104656
ASCRP004667	0.1605	0.0195807	-3.13067	-0.940708	hsa_circRNA_104411
ASCRP003040	0.1605	0.0196445	-3.12816	-0.620694	hsa_circRNA_102728
ASCRP002067	0.1608	0.0197384	-3.12448	-1.72549	hsa_circRNA_101720
ASCRP002380	0.1611	0.0199378	-3.11672	-0.61159	hsa_circRNA_102045
ASCRP004031	0.1611	0.0199383	-3.1167	-1.05632	hsa_circRNA_103740
ASCRP003802	0.1611	0.0199619	-3.11578	-0.727304	hsa_circRNA_103504
ASCRP003560	0.1614	0.0200624	-3.11191	-0.611023	hsa_circRNA_103262
ASCRP004127	0.162	0.0202266	-3.10563	-0.698434	hsa_circRNA_103837
ASCRP003240	0.162	0.0202675	-3.10407	-0.763668	hsa_circRNA_102933
ASCRP004776	0.1623	0.0204309	-3.09789	-0.813094	hsa_circRNA_104522
ASCRP000541	0.1623	0.0204942	-3.0955	-0.640793	hsa_circRNA_100152
ASCRP003281	0.1623	0.0204966	-3.09541	-0.999505	hsa_circRNA_102974
ASCRP004873	0.1633	0.0207144	-3.08728	-0.694419	hsa_circRNA_104620
ASCRP000386	0.1633	0.0207529	-3.08585	-0.648055	hsa_circRNA_002149
ASCRP002447	0.1652	0.0210679	-3.07428	-0.622824	hsa_circRNA_102115
ASCRP000969	0.1652	0.0211122	-3.07266	-0.852107	hsa_circRNA_100593
ASCRP002491	0.1661	0.0212971	-3.06597	-0.613871	hsa_circRNA_102159
ASCRP002405	0.1678	0.0215798	-3.05586	-0.609023	hsa_circRNA_102070
ASCRP002693	0.1679	0.0216852	-3.05212	-1.06904	hsa_circRNA_102374
ASCRP004297	0.1679	0.0217236	-3.05077	-0.565755	hsa_circRNA_104022
ASCRP002247	0.1682	0.021827	-3.04713	-1.26968	hsa_circRNA_101905
ASCRP003465	0.1723	0.0224364	-3.02607	-1.04228	hsa_circRNA_103164
ASCRP004368	0.1729	0.0226226	-3.01975	-0.585885	hsa_circRNA_104095
ASCRP004014	0.1729	0.0226486	-3.01888	-1.17982	hsa_circRNA_103723
ASCRP000385	0.1747	0.0230338	-3.00601	-3.17373	hsa_circRNA_002144
ASCRP003327	0.1747	0.0230645	-3.005	-0.96486	hsa_circRNA_103021
ASCRP001360	0.1747	0.0230859	-3.00429	-0.950746	hsa_circRNA_100989
ASCRP005193	0.1768	0.023482	-2.99133	-0.639075	hsa_circRNA_104946
ASCRP001882	0.1768	0.0234954	2.99089	1.02857	hsa_circRNA_101531
ASCRP004507	0.1775	0.0236577	-2.98565	-0.669268	hsa_circRNA_104235
ASCRP001859	0.1795	0.0240683	-2.97257	-0.589382	hsa_circRNA_101508
ASCRP004691	0.1795	0.0241549	-2.96984	-1.13156	hsa_circRNA_104435
ASCRP001490	0.1795	0.0242043	-2.96829	-0.633215	hsa_circRNA_101123
ASCRP005081	0.1795	0.0242108	-2.96809	-0.64163	hsa_circRNA_104833
ASCRP003781	0.1822	0.0246423	-2.95468	-0.649063	hsa_circRNA_103483
ASCRP003930	0.1832	0.0248503	-2.94831	-0.613938	hsa_circRNA_103635
ASCRP001153	0.1866	0.0253812	-2.9323	-0.564064	hsa_circRNA_100779
ASCRP003909	0.1875	0.0255754	-2.92654	-0.696318	hsa_circRNA_103614
ASCRP002273	0.1904	0.0260459	-2.91276	-0.813494	hsa_circRNA_101932
ASCRP000027	0.1911	0.0262864	-2.90582	-0.541131	hsa_circRNA_000274
ASCRP002815	0.1911	0.0262969	-2.90552	-0.623001	hsa_circRNA_102500
ASCRP004539	0.1932	0.0266674	-2.89497	-0.634696	hsa_circRNA_104269
ASCRP002926	0.195	0.0270447	-2.88439	-0.511556	hsa_circRNA_102613
ASCRP005329	0.195	0.027069	-2.88371	-1.22929	hsa_circRNA_400033
ASCRP000989	0.1973	0.0274547	-2.87306	-0.633913	hsa_circRNA_100614
ASCRP005282	0.1979	0.0276191	-2.86857	-0.581128	hsa_circRNA_105035
ASCRP001988	0.2003	0.0280596	-2.85669	-0.984694	hsa_circRNA_101639
ASCRP004306	0.2003	0.028116	-2.85518	-0.537801	hsa_circRNA_104031
ASCRP000580	0.2022	0.0285512	-2.84365	-1.07933	hsa_circRNA_100191
ASCRP003803	0.2022	0.0285781	-2.84295	-0.692493	hsa_circRNA_103505
ASCRP004178	0.2022	0.0286197	-2.84185	-0.962728	hsa_circRNA_103898
ASCRP004184	0.2042	0.0290059	-2.83181	-0.653113	hsa_circRNA_103904
ASCRP001004	0.2042	0.0291092	-2.82914	-0.560663	hsa_circRNA_100630
ASCRP003787	0.2042	0.0291902	-2.82707	-0.710061	hsa_circRNA_103489
ASCRP000375	0.2042	0.0292159	-2.82641	-0.629641	hsa_circRNA_002050
ASCRP003509	0.205	0.0294108	-2.82143	-1.226	hsa_circRNA_103211
ASCRP005230	0.2099	0.030191	-2.80185	-0.641995	hsa_circRNA_104983
ASCRP001580	0.2103	0.0303344	-2.79831	-0.660795	hsa_circRNA_101217
ASCRP001256	0.2108	0.03049	-2.79449	-0.691199	hsa_circRNA_100883
ASCRP000300	0.2127	0.0308528	-2.78566	-0.700753	hsa_circRNA_001579
ASCRP004247	0.214	0.0311253	-2.77911	-0.817355	hsa_circRNA_103967
ASCRP005272	0.2164	0.0315849	-2.76819	-0.539045	hsa_circRNA_105025
ASCRP002298	0.2164	0.0316743	-2.76608	-1.36415	hsa_circRNA_101958
ASCRP004767	0.2164	0.0317169	-2.76508	-1.05248	hsa_circRNA_104513
ASCRP002768	0.2174	0.0320066	-2.75832	-0.542118	hsa_circRNA_102449
ASCRP003990	0.2174	0.0320414	-2.75751	-0.49712	hsa_circRNA_103696
ASCRP000248	0.2184	0.0322781	-2.75203	-1.0294	hsa_circRNA_001302
ASCRP003537	0.2186	0.0323941	-2.74936	-0.562641	hsa_circRNA_103239
ASCRP000315	0.2192	0.032568	-2.74539	-2.44152	hsa_circRNA_001678
ASCRP000328	0.2215	0.0330463	-2.73456	-0.552698	hsa_circRNA_001754
ASCRP003432	0.2215	0.0331639	-2.73192	-0.867529	hsa_circRNA_103128
ASCRP005339	0.2215	0.0331914	-2.7313	-0.697471	hsa_circRNA_400043
ASCRP001592	0.2215	0.0332445	-2.73012	-0.877441	hsa_circRNA_101229
ASCRP004747	0.2217	0.0333749	-2.72721	-0.899195	hsa_circRNA_104493
ASCRP002197	0.2226	0.0335974	-2.72228	-0.76387	hsa_circRNA_101854
ASCRP001511	0.2231	0.0337677	-2.71854	-0.660716	hsa_circRNA_101145
ASCRP004834	0.2231	0.0338356	-2.71705	-0.926966	hsa_circRNA_104581
ASCRP005179	0.2231	0.0339288	-2.71501	-0.964009	hsa_circRNA_104932
ASCRP003056	0.2267	0.0345736	-2.70106	-0.579768	hsa_circRNA_102744
ASCRP002941	0.2267	0.0346883	-2.69861	-0.758552	hsa_circRNA_102628
ASCRP001364	0.2267	0.0347385	-2.69754	-0.757384	hsa_circRNA_100993
ASCRP000476	0.2267	0.0348254	2.69569	0.545089	hsa_circRNA_100086
ASCRP002741	0.23	0.0354205	-2.68316	-0.512084	hsa_circRNA_102422
ASCRP002690	0.2302	0.0355496	-2.68047	-0.633736	hsa_circRNA_102371
ASCRP001156	0.2311	0.0357811	-2.67568	-0.727941	hsa_circRNA_100782
ASCRP004427	0.2311	0.0358677	-2.67389	-0.535924	hsa_circRNA_104154
ASCRP004642	0.2316	0.0360384	-2.67039	-0.898567	hsa_circRNA_104381
ASCRP000172	0.2328	0.0363567	-2.6639	-1.17349	hsa_circRNA_000993
ASCRP000012	0.2328	0.0364489	-2.66203	-0.729042	hsa_circRNA_000104
ASCRP004080	0.2328	0.0365451	-2.66009	-0.662058	hsa_circRNA_103790
ASCRP003918	0.2328	0.0366065	-2.65885	-0.593413	hsa_circRNA_103623
ASCRP004369	0.2328	0.0366823	-2.65732	-0.500049	hsa_circRNA_104096
ASCRP003026	0.2339	0.0369457	-2.65205	-0.715304	hsa_circRNA_102714
ASCRP002172	0.2339	0.0370759	-2.64945	-0.591733	hsa_circRNA_101828
ASCRP002900	0.2339	0.037132	-2.64834	-0.753683	hsa_circRNA_102587
ASCRP003431	0.2366	0.037652	-2.63809	-0.803451	hsa_circRNA_103127
ASCRP004660	0.2368	0.0377627	-2.63593	-1.0962	hsa_circRNA_104400
ASCRP005174	0.2378	0.038021	-2.63091	-0.487567	hsa_circRNA_104927
ASCRP004758	0.2431	0.039092	-2.61049	-0.512716	hsa_circRNA_104504
ASCRP000043	0.2431	0.0391269	-2.60983	-1.15459	hsa_circRNA_000410
ASCRP004278	0.2431	0.0391591	-2.60923	-0.725015	hsa_circRNA_103998
ASCRP002053	0.2461	0.0397366	-2.59848	-0.742447	hsa_circRNA_101706
ASCRP001590	0.2482	0.0402467	-2.58912	-0.872762	hsa_circRNA_101227
ASCRP000767	0.2482	0.0402748	-2.58861	-0.934361	hsa_circRNA_100382
ASCRP001809	0.2493	0.040572	-2.58322	-0.86885	hsa_circRNA_101458
ASCRP003016	0.2493	0.0406348	-2.58209	-0.897602	hsa_circRNA_102704
ASCRP000685	0.2502	0.0408811	-2.57766	-0.692353	hsa_circRNA_100298
ASCRP003782	0.2517	0.0414346	-2.56781	-1.06586	hsa_circRNA_103484
ASCRP003746	0.2517	0.0414911	-2.56681	-0.644593	hsa_circRNA_103448
ASCRP003434	0.2517	0.0415141	-2.56641	-0.519155	hsa_circRNA_103130
ASCRP000244	0.2517	0.041523	-2.56625	-0.661207	hsa_circRNA_001288
ASCRP002292	0.2556	0.0422716	-2.55317	-0.798741	hsa_circRNA_101951
ASCRP002412	0.2558	0.0423929	-2.55108	-0.674052	hsa_circRNA_102077
ASCRP002623	0.2566	0.0427345	-2.54521	-0.771312	hsa_circRNA_102304
ASCRP002294	0.2566	0.0427558	-2.54485	-0.576912	hsa_circRNA_101954
ASCRP003058	0.2566	0.042837	-2.54346	-1.23818	hsa_circRNA_102746
ASCRP004396	0.2573	0.0430487	-2.53986	-0.474997	hsa_circRNA_104123
ASCRP002840	0.2577	0.0432768	-2.536	-0.608776	hsa_circRNA_102527
ASCRP002524	0.2577	0.0433149	-2.53535	-0.68861	hsa_circRNA_102196
ASCRP001214	0.2583	0.0435254	-2.53181	-0.588578	hsa_circRNA_100840
ASCRP001265	0.2586	0.0436719	-2.52936	-0.711197	hsa_circRNA_100892
ASCRP001910	0.2586	0.0437673	-2.52777	-0.689635	hsa_circRNA_101559
ASCRP000562	0.2637	0.0447384	-2.51175	-0.574523	hsa_circRNA_100173
ASCRP005361	0.2643	0.044995	-2.50758	-0.603958	hsa_circRNA_400067
ASCRP003345	0.2643	0.0450451	-2.50677	-0.722117	hsa_circRNA_103039
ASCRP000569	0.2661	0.0454579	-2.50013	-0.526048	hsa_circRNA_100180
ASCRP005260	0.2661	0.0455657	-2.4984	-0.84628	hsa_circRNA_105013
ASCRP000400	0.2686	0.0460986	2.48993	0.704458	hsa_circRNA_100010
ASCRP000823	0.2688	0.0463441	-2.48607	-0.592516	hsa_circRNA_100440
ASCRP003551	0.2688	0.0464466	-2.48446	-0.586261	hsa_circRNA_103253
ASCRP003255	0.2688	0.0464514	-2.48438	-0.811967	hsa_circRNA_102948
ASCRP004324	0.2697	0.0467003	-2.48049	-1.06264	hsa_circRNA_104050
ASCRP001643	0.2697	0.0468152	-2.47871	-0.778321	hsa_circRNA_101282
ASCRP000986	0.2727	0.0474724	-2.46857	-0.573335	hsa_circRNA_100611
ASCRP004358	0.2727	0.0475405	2.46753	0.912338	hsa_circRNA_104084
ASCRP002596	0.2727	0.0476468	-2.4659	-0.5794	hsa_circRNA_102268
ASCRP002249	0.2735	0.0478988	-2.46207	-0.477259	hsa_circRNA_101907
ASCRP001763	0.2752	0.0483031	-2.45596	-0.852452	hsa_circRNA_101404
ASCRP000928	0.2775	0.0488809	-2.44733	-0.457482	hsa_circRNA_100548
ASCRP002478	0.2775	0.0489264	-2.44665	-0.455422	hsa_circRNA_102146
ASCRP001615	0.2775	0.0490469	-2.44487	-0.482582	hsa_circRNA_101252
ASCRP003715	0.2775	0.0491454	-2.44341	-0.65238	hsa_circRNA_103417
ASCRP001543	0.2807	0.0498148	-2.4336	-0.478467	hsa_circRNA_101180
ASCRP003980	0.2826	0.0503391	-2.426	-0.520029	hsa_circRNA_103686
ASCRP000546	0.2826	0.0503808	-2.4254	-0.64653	hsa_circRNA_100157
ASCRP001568	0.2842	0.0508999	-2.41797	-0.726557	hsa_circRNA_101205
ASCRP000779	0.2842	0.0509834	-2.41679	-1.11282	hsa_circRNA_100395
ASCRP001332	0.2842	0.0509873	-2.41673	-0.659532	hsa_circRNA_100960
ASCRP002590	0.2847	0.0511992	-2.41373	-0.649674	hsa_circRNA_102262
ASCRP000373	0.289	0.052078	-2.4014	-0.464186	hsa_circRNA_002045
ASCRP004079	0.2893	0.0522617	-2.39885	-0.560502	hsa_circRNA_103789
ASCRP005353	0.2893	0.052368	2.39738	1.35013	hsa_circRNA_400059
ASCRP002505	0.2903	0.0526882	-2.39297	-0.666731	hsa_circRNA_102173
ASCRP001786	0.2903	0.0528046	-2.39138	-1.00392	hsa_circRNA_101427
ASCRP001541	0.2903	0.0530359	2.38822	0.733151	hsa_circRNA_101178
ASCRP005317	0.2903	0.053105	-2.38727	-0.839999	hsa_circRNA_400021
ASCRP000402	0.2903	0.0531156	2.38713	0.659888	hsa_circRNA_100012
ASCRP000240	0.2927	0.053657	-2.3798	-0.944451	hsa_circRNA_001264
ASCRP002378	0.3046	0.0559706	-2.3493	-0.480533	hsa_circRNA_102043
ASCRP000494	0.3054	0.056298	-2.3451	-0.463912	hsa_circRNA_100104
ASCRP003830	0.3054	0.0564351	-2.34334	-0.682597	hsa_circRNA_103532
ASCRP003971	0.3054	0.0564664	-2.34294	-0.43367	hsa_circRNA_103677
ASCRP000536	0.3061	0.0567174	-2.33974	-0.76984	hsa_circRNA_100147
ASCRP003845	0.3062	0.0568644	-2.33787	-0.509379	hsa_circRNA_103547
ASCRP005350	0.3069	0.0572548	-2.33294	-1.07489	hsa_circRNA_400056
ASCRP003750	0.3069	0.0573285	-2.33201	-0.558307	hsa_circRNA_103452
ASCRP005360	0.3069	0.0576082	-2.3285	-0.910985	hsa_circRNA_400066
ASCRP001418	0.3069	0.057656	-2.32791	-0.458181	hsa_circRNA_101050
ASCRP002938	0.3069	0.057693	-2.32744	-0.43275	hsa_circRNA_102625
ASCRP001395	0.3069	0.0577135	-2.32719	-0.687209	hsa_circRNA_101025
ASCRP003801	0.3078	0.0579943	-2.32369	-0.568675	hsa_circRNA_103503
ASCRP001793	0.3079	0.058131	-2.32199	-0.701255	hsa_circRNA_101434
ASCRP003875	0.31	0.0586549	-2.31553	-0.549733	hsa_circRNA_103579
ASCRP002462	0.3113	0.0590184	-2.31108	-0.721403	hsa_circRNA_102130
ASCRP000999	0.312	0.0592748	-2.30796	-0.841449	hsa_circRNA_100625
ASCRP001564	0.312	0.0594124	-2.30629	-0.601783	hsa_circRNA_101201
ASCRP001946	0.312	0.0595263	-2.30491	-0.612367	hsa_circRNA_101596
ASCRP000899	0.3132	0.0598788	-2.30066	-0.666183	hsa_circRNA_100517
ASCRP000056	0.3133	0.060018	-2.29899	-0.827758	hsa_circRNA_000486
ASCRP002471	0.3149	0.06095	-2.2879	-0.438005	hsa_circRNA_102139
ASCRP001747	0.3149	0.0610992	-2.28614	-0.544537	hsa_circRNA_101388
ASCRP004248	0.3149	0.0611397	-2.28566	-0.659032	hsa_circRNA_103968
ASCRP000828	0.3149	0.0611837	-2.28514	-0.740907	hsa_circRNA_100445
ASCRP000706	0.3149	0.0612134	2.2848	0.546053	hsa_circRNA_100319
ASCRP003469	0.3149	0.0612397	-2.28449	-0.491517	hsa_circRNA_103168
ASCRP005323	0.3149	0.0613051	-2.28372	-0.826907	hsa_circRNA_400027
ASCRP002131	0.3149	0.0613056	-2.28371	-0.486062	hsa_circRNA_101785
ASCRP002266	0.3149	0.0614358	-2.28219	-0.90556	hsa_circRNA_101924
ASCRP003804	0.3161	0.0618551	-2.2773	-0.67652	hsa_circRNA_103506
ASCRP000193	0.3161	0.06194	-2.27631	-0.834979	hsa_circRNA_001072
ASCRP000645	0.3161	0.0620322	-2.27524	-0.490649	hsa_circRNA_100257
ASCRP004748	0.3178	0.0625661	-2.26908	-0.820791	hsa_circRNA_104494
ASCRP005059	0.3178	0.0626178	-2.26849	-0.64901	hsa_circRNA_104810
ASCRP005220	0.3179	0.0628307	-2.26605	-0.596582	hsa_circRNA_104973
ASCRP005217	0.3179	0.0628835	-2.26544	-0.663737	hsa_circRNA_104970
ASCRP001507	0.3191	0.0632422	-2.26136	-0.537353	hsa_circRNA_101141
ASCRP004550	0.3191	0.0633657	-2.25996	-0.587603	hsa_circRNA_104285
ASCRP001524	0.3194	0.0635486	-2.25788	-0.602683	hsa_circRNA_101161
ASCRP000301	0.3204	0.0638772	-2.25418	-0.411189	hsa_circRNA_001583
ASCRP000456	0.3217	0.0642622	-2.24986	-0.411323	hsa_circRNA_100066
ASCRP002140	0.3222	0.064675	-2.24527	-0.501506	hsa_circRNA_101795
ASCRP002792	0.3222	0.0647399	-2.24455	-0.434537	hsa_circRNA_102475
ASCRP002000	0.3222	0.0647409	-2.24453	-0.762474	hsa_circRNA_101651
ASCRP000640	0.3223	0.064886	-2.24293	-0.491942	hsa_circRNA_100252
ASCRP002644	0.3248	0.0655223	-2.23592	-0.548958	hsa_circRNA_102325
ASCRP002795	0.3277	0.0662269	-2.22825	-0.750456	hsa_circRNA_102478
ASCRP003072	0.3298	0.0667895	-2.22218	-0.746111	hsa_circRNA_102761
ASCRP003085	0.3344	0.067842	-2.21096	-0.844456	hsa_circRNA_102774
ASCRP000442	0.3344	0.0679877	-2.20943	-0.663133	hsa_circRNA_100052
ASCRP001983	0.3352	0.0683753	-2.20535	-0.444472	hsa_circRNA_101634
ASCRP004957	0.3352	0.0683973	-2.20512	-0.601682	hsa_circRNA_104705
ASCRP002780	0.3374	0.0690544	-2.19827	-0.475066	hsa_circRNA_102463
ASCRP002589	0.3374	0.0691112	-2.19768	-0.727656	hsa_circRNA_102261
ASCRP002438	0.3389	0.0696998	-2.1916	-0.581602	hsa_circRNA_102105
ASCRP003298	0.3389	0.0697444	-2.19114	-0.387999	hsa_circRNA_102991
ASCRP002641	0.3389	0.0699397	-2.18914	-0.479416	hsa_circRNA_102322
ASCRP002310	0.3389	0.0699842	-2.18868	-0.393934	hsa_circRNA_101970
ASCRP004040	0.3389	0.070098	-2.18752	-0.796209	hsa_circRNA_103749
ASCRP002081	0.3389	0.0702095	-2.18638	-0.582824	hsa_circRNA_101735
ASCRP002985	0.339	0.0703629	-2.18482	-0.53441	hsa_circRNA_102672
ASCRP000267	0.3407	0.0708677	-2.1797	-1.14456	hsa_circRNA_001405
ASCRP000054	0.3407	0.071341	-2.17493	-0.626685	hsa_circRNA_000481
ASCRP000915	0.3407	0.0714112	-2.17423	-0.550314	hsa_circRNA_100534
ASCRP000113	0.3407	0.0714477	-2.17386	-0.602427	hsa_circRNA_000764
ASCRP005284	0.3407	0.0715016	-2.17332	-0.733124	hsa_circRNA_105037
ASCRP004466	0.3407	0.071532	-2.17302	-1.1574	hsa_circRNA_104193
ASCRP005093	0.3425	0.0720516	-2.16784	-0.580528	hsa_circRNA_104846
ASCRP000616	0.3425	0.072257	-2.1658	-0.645508	hsa_circRNA_100228
ASCRP002950	0.3425	0.0724768	-2.16363	-0.475771	hsa_circRNA_102637
ASCRP003510	0.3425	0.072551	-2.16289	-0.67944	hsa_circRNA_103212
ASCRP000995	0.3425	0.0725772	-2.16263	-0.424419	hsa_circRNA_100621
ASCRP001774	0.3432	0.0728468	-2.15998	-0.482072	hsa_circRNA_101415
ASCRP003645	0.3433	0.0730168	-2.15831	-0.507907	hsa_circRNA_103347
ASCRP001494	0.3479	0.0741186	-2.1476	-0.563911	hsa_circRNA_101127
ASCRP004546	0.3484	0.0743581	-2.14529	-0.408175	hsa_circRNA_104281
ASCRP001941	0.3502	0.0750099	-2.13904	-0.534144	hsa_circRNA_101591
ASCRP005111	0.3502	0.0751437	-2.13777	-1.02731	hsa_circRNA_104864
ASCRP001666	0.3502	0.0751505	-2.1377	-0.566395	hsa_circRNA_101307
ASCRP001044	0.3502	0.0752865	-2.13641	-0.459377	hsa_circRNA_100670
ASCRP001751	0.3531	0.0760632	-2.12907	-0.62082	hsa_circRNA_101392
ASCRP000922	0.3556	0.0767333	2.1228	1.02392	hsa_circRNA_100542
ASCRP004351	0.3574	0.0772644	-2.11787	-0.569427	hsa_circRNA_104077
ASCRP002092	0.3587	0.077683	-2.11401	-0.466996	hsa_circRNA_101746
ASCRP002594	0.3613	0.0784003	-2.10744	-0.374722	hsa_circRNA_102266
ASCRP005183	0.3622	0.0787714	-2.10406	-0.384898	hsa_circRNA_104936
ASCRP001611	0.3622	0.0790789	-2.10128	-0.807603	hsa_circRNA_101248
ASCRP005011	0.3622	0.0791195	-2.10091	-0.464638	hsa_circRNA_104761
ASCRP003146	0.3622	0.0792157	-2.10005	-1.17781	hsa_circRNA_102838
ASCRP000727	0.3622	0.079289	-2.09938	-0.491982	hsa_circRNA_100342
ASCRP001293	0.3627	0.0795481	-2.09705	-0.626489	hsa_circRNA_100920
ASCRP003437	0.3638	0.0799262	-2.09367	-0.865854	hsa_circRNA_103134
ASCRP000405	0.3684	0.0810738	2.08348	0.507066	hsa_circRNA_100015
ASCRP000791	0.3686	0.0812792	-2.08168	-0.578847	hsa_circRNA_100407
ASCRP002472	0.3698	0.0818137	-2.077	-0.446233	hsa_circRNA_102140
ASCRP002884	0.3698	0.0819301	-2.07598	-0.432546	hsa_circRNA_102571
ASCRP004538	0.3698	0.0819742	-2.07559	-0.821959	hsa_circRNA_104268
ASCRP002660	0.3704	0.0822553	-2.07315	-0.721551	hsa_circRNA_102341
ASCRP005113	0.3719	0.0827931	-2.0685	-0.390581	hsa_circRNA_104866
ASCRP004774	0.3719	0.0828731	-2.06781	-0.526745	hsa_circRNA_104520
ASCRP002888	0.3724	0.083138	-2.06553	-0.754215	hsa_circRNA_102575
ASCRP002876	0.3735	0.0835087	-2.06235	-0.700306	hsa_circRNA_102563
ASCRP002087	0.3742	0.0838119	-2.05977	-0.371462	hsa_circRNA_101741
ASCRP001804	0.3743	0.0839932	-2.05822	-0.508676	hsa_circRNA_101447
ASCRP004339	0.3748	0.0843487	-2.05521	-0.424622	hsa_circRNA_104065
ASCRP003296	0.3748	0.0843865	-2.05489	-0.410889	hsa_circRNA_102989
ASCRP003377	0.3756	0.0847182	-2.05209	-0.557055	hsa_circRNA_103073
ASCRP000394	0.3774	0.0852708	-2.04745	-0.534641	hsa_circRNA_100004
ASCRP003014	0.3781	0.0856775	-2.04405	-0.519164	hsa_circRNA_102702
ASCRP000730	0.3781	0.0857309	-2.0436	-0.392065	hsa_circRNA_100345
ASCRP004695	0.3818	0.0867101	-2.0355	-0.721894	hsa_circRNA_104439
ASCRP002562	0.3821	0.087131	-2.03204	-0.406594	hsa_circRNA_102234
ASCRP003053	0.3821	0.0873572	-2.03019	-0.744792	hsa_circRNA_102741
ASCRP001351	0.3821	0.0873626	-2.03015	-0.720422	hsa_circRNA_100980
ASCRP003389	0.3821	0.0873929	-2.0299	-0.868033	hsa_circRNA_103085
ASCRP002742	0.3852	0.088242	-2.023	-0.753519	hsa_circRNA_102423
ASCRP003669	0.3853	0.0884199	-2.02157	-0.37255	hsa_circRNA_103371
ASCRP005221	0.3856	0.0886773	-2.01949	-0.546705	hsa_circRNA_104974
ASCRP002915	0.3856	0.088797	-2.01853	-0.855086	hsa_circRNA_102602
ASCRP001508	0.3891	0.0897353	-2.01103	-1.01744	hsa_circRNA_101142
ASCRP000862	0.3893	0.0899457	-2.00936	-0.724165	hsa_circRNA_100479
ASCRP004764	0.3898	0.0903131	-2.00645	-0.909804	hsa_circRNA_104510
ASCRP000985	0.3898	0.0903526	-2.00614	-0.515994	hsa_circRNA_100610
ASCRP001633	0.3917	0.0909565	-2.00139	-0.537204	hsa_circRNA_101272
ASCRP001397	0.393	0.0914065	-1.99787	-0.484792	hsa_circRNA_101027
ASCRP001565	0.3937	0.0917291	-1.99535	-0.506534	hsa_circRNA_101202
ASCRP004644	0.3963	0.0925318	-1.98914	-0.372534	hsa_circRNA_104383
ASCRP003141	0.3963	0.092648	-1.98824	-0.602116	hsa_circRNA_102832
ASCRP005144	0.3969	0.0930229	-1.98536	-0.431579	hsa_circRNA_104897
ASCRP000500	0.3969	0.0930875	-1.98487	-0.449494	hsa_circRNA_100110
ASCRP002381	0.3977	0.0937733	-1.97963	-0.483937	hsa_circRNA_102046
ASCRP003386	0.3977	0.0937808	-1.97957	-0.657005	hsa_circRNA_103082
ASCRP000140	0.3977	0.0938924	-1.97873	-1.11445	hsa_circRNA_000864
ASCRP004940	0.3977	0.0938942	-1.97871	-0.38064	hsa_circRNA_104688
ASCRP002089	0.3991	0.0944172	-1.97475	-0.379059	hsa_circRNA_101743
ASCRP001051	0.3991	0.0946143	-1.97326	-0.375634	hsa_circRNA_100677
ASCRP002701	0.3991	0.0947089	-1.97255	-0.435688	hsa_circRNA_102382
ASCRP001289	0.3994	0.0949226	-1.97094	-0.405671	hsa_circRNA_100916
ASCRP002650	0.3996	0.0951327	-1.96937	-0.497451	hsa_circRNA_102331
ASCRP004680	0.4023	0.0959838	-1.96301	-0.429734	hsa_circRNA_104424
ASCRP004439	0.4023	0.0961046	1.96212	1.567	hsa_circRNA_104166
ASCRP002711	0.4026	0.0963195	-1.96052	-0.521702	hsa_circRNA_102392
ASCRP001368	0.4047	0.0969855	-1.95561	-0.974424	hsa_circRNA_100997
ASCRP005105	0.406	0.0974426	-1.95225	-0.763171	hsa_circRNA_104858
ASCRP002205	0.4065	0.097741	-1.95007	-0.647323	hsa_circRNA_101862
ASCRP004690	0.4065	0.0980886	-1.94754	-0.382845	hsa_circRNA_104434
ASCRP001003	0.4065	0.0980962	-1.94749	-0.358591	hsa_circRNA_100629
ASCRP002493	0.4065	0.0982145	-1.94663	-0.551823	hsa_circRNA_102161
ASCRP003625	0.4071	0.0985189	-1.94442	-0.353128	hsa_circRNA_103327
ASCRP001764	0.4078	0.0988514	-1.94202	-0.493553	hsa_circRNA_101405
ASCRP001184	0.4098	0.0994788	-1.9375	-0.458853	hsa_circRNA_100810
ASCRP005099	0.4112	0.0999938	-1.93382	-0.727105	hsa_circRNA_104852
ASCRP004012	0.4124	0.100447	-1.9306	-0.461461	hsa_circRNA_103721
ASCRP004150	0.413	0.100756	-1.92841	-0.547539	hsa_circRNA_103862
ASCRP000926	0.4215	0.102987	-1.91278	-0.460783	hsa_circRNA_100546
ASCRP001429	0.4238	0.103949	-1.90615	-0.453688	hsa_circRNA_101061
ASCRP001639	0.4238	0.104063	-1.90537	-1.07206	hsa_circRNA_101278
ASCRP004599	0.4238	0.104108	-1.90506	-0.794659	hsa_circRNA_104336
ASCRP001365	0.4238	0.104311	-1.90367	-0.447565	hsa_circRNA_100994
ASCRP004102	0.4238	0.104366	-1.90329	-0.619943	hsa_circRNA_103812
ASCRP001665	0.4334	0.106937	-1.88593	-0.602168	hsa_circRNA_101306
ASCRP002017	0.4334	0.107081	-1.88497	-0.602836	hsa_circRNA_101670
ASCRP004630	0.4344	0.10756	-1.88178	-0.499011	hsa_circRNA_104368
ASCRP000475	0.4344	0.107732	1.88065	1.28445	hsa_circRNA_100085
ASCRP005371	0.4344	0.107843	-1.87991	-0.531748	hsa_circRNA_400077
ASCRP004384	0.435	0.108251	-1.87722	-0.423136	hsa_circRNA_104111
ASCRP001249	0.435	0.108314	1.87681	0.548679	hsa_circRNA_100876
ASCRP000686	0.4356	0.108644	-1.87463	-0.511186	hsa_circRNA_100299
ASCRP004478	0.4397	0.10984	-1.86682	-0.541575	hsa_circRNA_104205
ASCRP004576	0.4465	0.111705	1.8548	1.29717	hsa_circRNA_104313
ASCRP000615	0.4489	0.112498	1.84975	1.15137	hsa_circRNA_100227
ASCRP005273	0.449	0.112684	-1.84857	-0.566773	hsa_circRNA_105026
ASCRP005358	0.4495	0.112995	-1.84661	-0.523458	hsa_circRNA_400064
ASCRP002246	0.4503	0.113566	-1.843	-0.517534	hsa_circRNA_101904
ASCRP000979	0.4503	0.113716	1.84207	1.46698	hsa_circRNA_100604
ASCRP004000	0.4503	0.113723	-1.84202	-0.468494	hsa_circRNA_103706
ASCRP002126	0.4506	0.113959	-1.84054	-0.572797	hsa_circRNA_101780
ASCRP003626	0.4575	0.11589	-1.82854	-0.640062	hsa_circRNA_103328
ASCRP002324	0.4579	0.116178	-1.82677	-0.504322	hsa_circRNA_101987
ASCRP005052	0.4591	0.116657	-1.82383	-0.579445	hsa_circRNA_104803
ASCRP003123	0.4622	0.117629	1.81791	0.720623	hsa_circRNA_102814
ASCRP002482	0.4647	0.118451	-1.81293	-0.457435	hsa_circRNA_102150
ASCRP000170	0.4651	0.118721	-1.8113	-0.56886	hsa_circRNA_000987
ASCRP001584	0.4679	0.119638	-1.8058	-0.826842	hsa_circRNA_101221
ASCRP004183	0.4681	0.119855	-1.80451	-0.459377	hsa_circRNA_103903
ASCRP005083	0.4687	0.120201	-1.80245	-0.579679	hsa_circRNA_104835
ASCRP000434	0.4693	0.120544	-1.80041	-0.589555	hsa_circRNA_100044
ASCRP004914	0.4699	0.120871	-1.79848	-0.688047	hsa_circRNA_104661
ASCRP003665	0.4725	0.121733	-1.7934	-0.399822	hsa_circRNA_103367
ASCRP000160	0.4734	0.122142	-1.791	-0.408986	hsa_circRNA_000945
ASCRP003985	0.4744	0.122803	-1.78714	-0.609657	hsa_circRNA_103691
ASCRP000380	0.4744	0.1229	-1.78658	-0.566441	hsa_circRNA_002106
ASCRP000680	0.4744	0.122959	-1.78624	-0.465968	hsa_circRNA_100292
ASCRP003037	0.4755	0.123436	-1.78346	-0.413816	hsa_circRNA_102725
ASCRP000431	0.4801	0.124815	-1.77552	-0.663772	hsa_circRNA_100041
ASCRP004372	0.482	0.125491	-1.77165	-0.71491	hsa_circRNA_104099
ASCRP004006	0.4846	0.126349	-1.76678	-0.357757	hsa_circRNA_103714
ASCRP003089	0.4848	0.126592	-1.76541	-0.316341	hsa_circRNA_102778
ASCRP004719	0.4851	0.12687	-1.76384	-0.412077	hsa_circRNA_104465
ASCRP002221	0.4851	0.127206	1.76194	0.388443	hsa_circRNA_101879
ASCRP001268	0.4851	0.127252	-1.76168	-0.486076	hsa_circRNA_100895
ASCRP001353	0.4854	0.127516	-1.7602	-0.481791	hsa_circRNA_100982
ASCRP004465	0.4868	0.128068	-1.75711	-0.458112	hsa_circRNA_104192
ASCRP001216	0.4894	0.129118	-1.75127	-0.364764	hsa_circRNA_100842
ASCRP004003	0.4894	0.129254	-1.75051	-0.463481	hsa_circRNA_103710
ASCRP004492	0.4894	0.129339	-1.75004	-0.620856	hsa_circRNA_104220
ASCRP001189	0.4896	0.129728	-1.74789	-0.898512	hsa_circRNA_100815
ASCRP004044	0.4896	0.129778	-1.74762	-0.656608	hsa_circRNA_103753
ASCRP002112	0.4949	0.13165	-1.73736	-0.694977	hsa_circRNA_101766
ASCRP002344	0.4949	0.131721	-1.73697	-0.574867	hsa_circRNA_102008
ASCRP005162	0.4949	0.131762	-1.73675	-0.418249	hsa_circRNA_104915
ASCRP005307	0.495	0.131978	-1.73558	-0.324307	hsa_circRNA_400011
ASCRP005169	0.4988	0.133373	-1.72805	-0.467878	hsa_circRNA_104922
ASCRP000180	0.4988	0.133502	-1.72735	-0.51798	hsa_circRNA_001038
ASCRP003460	0.4988	0.133568	-1.727	-0.36892	hsa_circRNA_103159
ASCRP004124	0.5006	0.134247	-1.72337	-0.525529	hsa_circRNA_103834
ASCRP000419	0.5008	0.134489	-1.72208	-0.354291	hsa_circRNA_100029
ASCRP000595	0.5042	0.135787	-1.71519	-0.458165	hsa_circRNA_100206
ASCRP000142	0.5042	0.136041	-1.71385	-0.380428	hsa_circRNA_000868
ASCRP003423	0.5042	0.136198	-1.71303	-0.435258	hsa_circRNA_103119
ASCRP001194	0.5042	0.13621	-1.71296	-0.380186	hsa_circRNA_100820
ASCRP004508	0.5057	0.136803	-1.70985	-0.424566	hsa_circRNA_104236
ASCRP005021	0.5057	0.137006	-1.70878	-0.560068	hsa_circRNA_104771
ASCRP001817	0.5066	0.137451	-1.70646	-0.352602	hsa_circRNA_101466
ASCRP003450	0.5093	0.138379	-1.70163	-0.654125	hsa_circRNA_103148
ASCRP001286	0.5122	0.139375	-1.69649	-0.334455	hsa_circRNA_100913
ASCRP004835	0.5123	0.139578	-1.69544	-0.607634	hsa_circRNA_104582
ASCRP005109	0.5144	0.140351	-1.69148	-0.713511	hsa_circRNA_104862
ASCRP005388	0.5161	0.141172	-1.68729	-0.364559	hsa_circRNA_400095
ASCRP004277	0.5161	0.141233	-1.68698	-0.330648	hsa_circRNA_103997
ASCRP001266	0.5166	0.141728	-1.68447	-0.403161	hsa_circRNA_100893
ASCRP001825	0.5166	0.141768	-1.68427	-0.46751	hsa_circRNA_101474
ASCRP003892	0.5173	0.142168	-1.68224	-0.507178	hsa_circRNA_103597
ASCRP002165	0.5175	0.142602	-1.68005	-0.559386	hsa_circRNA_101820
ASCRP001471	0.5175	0.14263	-1.67992	-0.502294	hsa_circRNA_101103
ASCRP005070	0.5185	0.143268	-1.67671	-0.448383	hsa_circRNA_104821
ASCRP001622	0.5185	0.143657	-1.67476	-0.39143	hsa_circRNA_101260
ASCRP003574	0.5185	0.14382	-1.67395	-0.554561	hsa_circRNA_103276
ASCRP003221	0.5185	0.143887	-1.67361	-0.527881	hsa_circRNA_102913
ASCRP003557	0.5185	0.14392	-1.67345	-0.447345	hsa_circRNA_103259
ASCRP004729	0.521	0.144824	-1.66895	-0.596736	hsa_circRNA_104475
ASCRP002103	0.5219	0.145401	-1.66609	-0.41141	hsa_circRNA_101757
ASCRP003426	0.5219	0.145466	-1.66577	-0.425698	hsa_circRNA_103122
ASCRP001979	0.522	0.14571	-1.66457	-0.436738	hsa_circRNA_101630
ASCRP002307	0.522	0.145914	-1.66356	-1.24303	hsa_circRNA_101967
ASCRP002913	0.522	0.146099	-1.66265	-0.560349	hsa_circRNA_102600
ASCRP005063	0.524	0.146938	-1.65853	-0.534328	hsa_circRNA_104814
ASCRP004172	0.524	0.14709	-1.65779	-0.332468	hsa_circRNA_103892
ASCRP000912	0.5245	0.147464	-1.65596	-0.536135	hsa_circRNA_100531
ASCRP000074	0.5245	0.147633	-1.65514	-0.458863	hsa_circRNA_000596
ASCRP001801	0.5251	0.148018	-1.65327	-0.828832	hsa_circRNA_101444
ASCRP001157	0.5296	0.149474	-1.64623	-0.424506	hsa_circRNA_100783
ASCRP001843	0.5308	0.15002	-1.6436	-0.348014	hsa_circRNA_101492
ASCRP001176	0.5316	0.150513	-1.64124	-0.475332	hsa_circRNA_100802
ASCRP001873	0.5316	0.150759	-1.64007	-0.532164	hsa_circRNA_101522
ASCRP000408	0.5316	0.150869	1.63954	1.23467	hsa_circRNA_100018
ASCRP003916	0.5325	0.151435	-1.63684	-0.507002	hsa_circRNA_103621
ASCRP001851	0.5325	0.151736	-1.63541	-0.292556	hsa_circRNA_101500
ASCRP004161	0.5325	0.151765	-1.63528	-0.33878	hsa_circRNA_103879
ASCRP002932	0.534	0.152383	1.63235	0.564864	hsa_circRNA_102619
ASCRP001766	0.5361	0.153208	-1.62846	-0.773942	hsa_circRNA_101407
ASCRP000911	0.5362	0.153559	-1.62681	-0.381013	hsa_circRNA_100530
ASCRP001367	0.5362	0.15364	-1.62643	-0.336384	hsa_circRNA_100996
ASCRP004574	0.5366	0.153977	-1.62485	-1.03592	hsa_circRNA_104310
ASCRP003497	0.5367	0.154219	-1.62372	-0.351771	hsa_circRNA_103199
ASCRP001576	0.5386	0.15512	-1.61952	-1.11179	hsa_circRNA_101213
ASCRP001359	0.5386	0.155165	-1.61932	-0.640986	hsa_circRNA_100988
ASCRP001125	0.5415	0.15623	1.61438	1.21409	hsa_circRNA_100751
ASCRP004104	0.5425	0.157009	-1.6108	-0.651755	hsa_circRNA_103814
ASCRP001746	0.5425	0.15715	1.61015	1.19779	hsa_circRNA_101387
ASCRP003179	0.5425	0.157305	-1.60944	-0.718867	hsa_circRNA_102871
ASCRP000122	0.5425	0.157372	-1.60913	-0.338315	hsa_circRNA_000792
ASCRP002042	0.5431	0.157755	1.60738	2.20972	hsa_circRNA_101695
ASCRP000711	0.5472	0.159141	-1.60107	-0.394382	hsa_circRNA_100326
ASCRP004005	0.5484	0.159885	-1.5977	-0.609623	hsa_circRNA_103712
ASCRP002466	0.5484	0.15992	-1.59754	-0.345763	hsa_circRNA_102134
ASCRP003461	0.5486	0.1602	1.59628	1.07134	hsa_circRNA_103160
ASCRP004429	0.5506	0.160993	-1.59271	-0.36601	hsa_circRNA_104156
ASCRP005082	0.5512	0.161515	-1.59038	-0.366499	hsa_circRNA_104834
ASCRP002348	0.5512	0.161618	-1.58992	-0.312981	hsa_circRNA_102012
ASCRP003107	0.5538	0.162627	-1.58542	-0.708703	hsa_circRNA_102798
ASCRP003638	0.5538	0.1628	-1.58465	-0.448977	hsa_circRNA_103340
ASCRP004781	0.5559	0.163626	-1.58099	-0.409941	hsa_circRNA_104527
ASCRP004837	0.563	0.165939	-1.57085	-0.295771	hsa_circRNA_104584
ASCRP004855	0.5641	0.166485	-1.56847	-0.548917	hsa_circRNA_104602
ASCRP004383	0.5649	0.167067	-1.56594	-0.510757	hsa_circRNA_104110
ASCRP003318	0.5649	0.167299	-1.56494	-0.491902	hsa_circRNA_103012
ASCRP001606	0.5649	0.167398	-1.56451	-0.369374	hsa_circRNA_101243
ASCRP001727	0.5656	0.167828	-1.56265	-0.337739	hsa_circRNA_101368
ASCRP002983	0.5658	0.168313	-1.56057	-0.285472	hsa_circRNA_102670
ASCRP002804	0.5658	0.168334	-1.56048	-0.286945	hsa_circRNA_102487
ASCRP000430	0.5671	0.169066	-1.55734	-0.39725	hsa_circRNA_100040
ASCRP001345	0.5671	0.169164	-1.55692	-0.407634	hsa_circRNA_100974
ASCRP002801	0.5692	0.170009	-1.55331	-0.28719	hsa_circRNA_102484
ASCRP003933	0.5722	0.171326	1.54772	0.296196	hsa_circRNA_103639
ASCRP000772	0.5722	0.171594	-1.54658	-0.321863	hsa_circRNA_100387
ASCRP002238	0.5722	0.171795	-1.54573	-0.400918	hsa_circRNA_101896
ASCRP002722	0.5722	0.171809	-1.54568	-0.657727	hsa_circRNA_102403
ASCRP001280	0.574	0.172648	-1.54214	-0.471236	hsa_circRNA_100907
ASCRP004138	0.574	0.172778	-1.5416	-0.414461	hsa_circRNA_103849
ASCRP005346	0.574	0.173005	-1.54065	-0.530337	hsa_circRNA_400051
ASCRP003925	0.5783	0.174522	-1.53432	-0.587442	hsa_circRNA_103630
ASCRP002270	0.5802	0.175337	-1.53093	-0.308051	hsa_circRNA_101928
ASCRP002854	0.5822	0.176154	-1.52756	-0.426494	hsa_circRNA_102541
ASCRP000507	0.5828	0.176652	1.52551	1.14072	hsa_circRNA_100117
ASCRP003197	0.5828	0.176984	1.52415	0.720889	hsa_circRNA_102889
ASCRP003035	0.5828	0.177048	-1.52388	-0.394349	hsa_circRNA_102723
ASCRP003554	0.5828	0.177443	1.52227	0.442761	hsa_circRNA_103256
ASCRP005382	0.5828	0.177577	-1.52172	-0.305736	hsa_circRNA_400089
ASCRP005266	0.5828	0.178013	-1.51993	-0.488812	hsa_circRNA_105019
ASCRP004741	0.5828	0.178029	-1.51987	-0.304625	hsa_circRNA_104487
ASCRP001042	0.5828	0.178164	1.51932	0.416741	hsa_circRNA_100668
ASCRP000717	0.584	0.179267	-1.51484	-0.4384	hsa_circRNA_100332
ASCRP001885	0.584	0.179445	-1.51411	-0.467571	hsa_circRNA_101534
ASCRP003770	0.584	0.179499	-1.51389	-0.280572	hsa_circRNA_103472
ASCRP005031	0.584	0.179677	-1.51318	-0.331068	hsa_circRNA_104781
ASCRP003218	0.584	0.179677	-1.51317	-0.449313	hsa_circRNA_102910
ASCRP001290	0.588	0.181299	-1.50664	-0.454604	hsa_circRNA_100917
ASCRP002735	0.588	0.181374	-1.50634	-0.410979	hsa_circRNA_102416
ASCRP001079	0.5886	0.181774	-1.50474	-0.434752	hsa_circRNA_100705
ASCRP004818	0.5891	0.182257	-1.50281	-0.430529	hsa_circRNA_104565
ASCRP003605	0.5891	0.18252	1.50176	1.38218	hsa_circRNA_103307
ASCRP000236	0.5891	0.182628	-1.50133	-0.801749	hsa_circRNA_001241
ASCRP002552	0.5902	0.183566	-1.4976	-0.382336	hsa_circRNA_102224
ASCRP001482	0.5902	0.183611	-1.49742	-0.342973	hsa_circRNA_101115
ASCRP003203	0.5902	0.183661	1.49722	0.281752	hsa_circRNA_102895
ASCRP001358	0.591	0.184208	-1.49506	-0.283625	hsa_circRNA_100987
ASCRP003649	0.591	0.184439	-1.49414	-0.383445	hsa_circRNA_103351
ASCRP001504	0.591	0.184604	-1.49349	-0.468729	hsa_circRNA_101138
ASCRP004168	0.5927	0.185373	-1.49046	-0.37841	hsa_circRNA_103888
ASCRP005102	0.5998	0.187895	-1.48062	-0.535101	hsa_circRNA_104855
ASCRP001846	0.5998	0.188054	-1.48	-0.4017	hsa_circRNA_101495
ASCRP003754	0.6023	0.189075	-1.47605	-0.304969	hsa_circRNA_103456
ASCRP000217	0.6032	0.189628	1.47392	1.06864	hsa_circRNA_001175
ASCRP003115	0.6032	0.189908	-1.47284	-0.359574	hsa_circRNA_102806
ASCRP001343	0.6032	0.190062	-1.47225	-0.47122	hsa_circRNA_100972
ASCRP002256	0.604	0.190734	1.46967	0.524098	hsa_circRNA_101914
ASCRP003611	0.604	0.190859	-1.4692	-0.28736	hsa_circRNA_103313
ASCRP004566	0.604	0.191026	-1.46856	-0.280206	hsa_circRNA_104302
ASCRP005310	0.6057	0.191805	-1.46559	-0.462995	hsa_circRNA_400014
ASCRP004757	0.6066	0.192307	1.46368	0.955884	hsa_circRNA_104503
ASCRP001315	0.607	0.192816	-1.46174	-0.492497	hsa_circRNA_100943
ASCRP001038	0.607	0.192921	-1.46135	-0.366529	hsa_circRNA_100664
ASCRP004430	0.6074	0.193285	-1.45997	-0.317041	hsa_circRNA_104157
ASCRP001616	0.611	0.194805	-1.45424	-0.463472	hsa_circRNA_101253
ASCRP002347	0.611	0.194903	-1.45387	-0.446086	hsa_circRNA_102011
ASCRP002145	0.6117	0.195471	-1.45175	-0.266831	hsa_circRNA_101800
ASCRP001473	0.6117	0.195608	-1.45123	-0.311211	hsa_circRNA_101106
ASCRP005073	0.6126	0.196441	-1.44812	-0.510839	hsa_circRNA_104824
ASCRP004742	0.6126	0.197205	-1.44529	-0.276704	hsa_circRNA_104488
ASCRP002099	0.6126	0.197233	-1.44518	-0.547654	hsa_circRNA_101753
ASCRP000716	0.6126	0.197465	-1.44432	-0.332019	hsa_circRNA_100331
ASCRP002848	0.6126	0.197679	-1.44353	-0.272431	hsa_circRNA_102535
ASCRP000384	0.6126	0.198041	-1.44219	-0.764701	hsa_circRNA_002143
ASCRP004258	0.6126	0.1981	-1.44197	-0.421342	hsa_circRNA_103978
ASCRP003342	0.6126	0.19812	-1.4419	-0.465977	hsa_circRNA_103036
ASCRP000557	0.6126	0.198277	1.44131	0.719401	hsa_circRNA_100168
ASCRP000816	0.6126	0.198435	1.44073	1.19891	hsa_circRNA_100433
ASCRP002009	0.6126	0.198541	-1.44034	-0.787652	hsa_circRNA_101661
ASCRP002588	0.6131	0.199486	-1.43686	-0.448431	hsa_circRNA_102260
ASCRP002820	0.6131	0.199567	-1.43657	-0.281504	hsa_circRNA_102506
ASCRP003631	0.6131	0.199696	1.43609	0.667083	hsa_circRNA_103333
ASCRP004732	0.6131	0.199758	-1.43586	-0.320744	hsa_circRNA_104478
ASCRP003544	0.6131	0.20044	-1.43337	-0.405369	hsa_circRNA_103246
ASCRP004473	0.6131	0.200478	-1.43323	-0.313599	hsa_circRNA_104200
ASCRP004775	0.6131	0.200744	-1.43225	-0.451419	hsa_circRNA_104521
ASCRP000354	0.6131	0.200924	-1.4316	-0.364866	hsa_circRNA_001950
ASCRP003903	0.6131	0.200951	-1.4315	-0.636328	hsa_circRNA_103608
ASCRP002556	0.6131	0.201761	1.42855	0.55837	hsa_circRNA_102228
ASCRP005303	0.6131	0.20211	-1.42728	-0.437995	hsa_circRNA_400007
ASCRP002611	0.6131	0.202154	-1.42712	-0.377966	hsa_circRNA_102292
ASCRP001248	0.6131	0.202161	-1.4271	-0.458322	hsa_circRNA_100875
ASCRP002225	0.6131	0.202204	1.42694	0.572545	hsa_circRNA_101883
ASCRP004298	0.6131	0.202305	-1.42657	-0.269311	hsa_circRNA_104023
ASCRP005243	0.6144	0.203288	-1.42302	-0.423424	hsa_circRNA_104996
ASCRP005088	0.6144	0.203354	-1.42278	-0.48039	hsa_circRNA_104840
ASCRP003300	0.6144	0.203902	1.42081	2.02648	hsa_circRNA_102993
ASCRP000006	0.6144	0.204229	-1.41963	-0.426945	hsa_circRNA_000042
ASCRP004751	0.6144	0.204277	-1.41946	-0.342037	hsa_circRNA_104497
ASCRP003709	0.6144	0.204354	-1.41918	-0.647907	hsa_circRNA_103411
ASCRP005150	0.6144	0.204392	-1.41904	-0.510127	hsa_circRNA_104903
ASCRP004236	0.6163	0.205278	1.41587	0.57051	hsa_circRNA_103956
ASCRP001682	0.617	0.205756	-1.41416	-0.354207	hsa_circRNA_101323
ASCRP001469	0.6175	0.206159	-1.41272	-0.519746	hsa_circRNA_101101
ASCRP003288	0.6177	0.206455	-1.41167	-0.355785	hsa_circRNA_102981
ASCRP002716	0.6179	0.206772	-1.41054	-0.465942	hsa_circRNA_102397
ASCRP000028	0.6189	0.20735	-1.40849	-0.36226	hsa_circRNA_000280
ASCRP002074	0.6222	0.208693	1.40374	0.428754	hsa_circRNA_101727
ASCRP005345	0.6231	0.209432	1.40114	0.861055	hsa_circRNA_400049
ASCRP003134	0.6231	0.209473	-1.40099	-0.31379	hsa_circRNA_102825
ASCRP003831	0.6257	0.210791	-1.39638	-0.3972	hsa_circRNA_103533
ASCRP002856	0.6257	0.210859	1.39614	0.521196	hsa_circRNA_102543
ASCRP004274	0.6258	0.211116	-1.39524	-0.530985	hsa_circRNA_103994
ASCRP000792	0.6259	0.211413	-1.39421	-0.324624	hsa_circRNA_100409
ASCRP000362	0.6262	0.211747	-1.39305	-0.265193	hsa_circRNA_001993
ASCRP002040	0.6278	0.212535	-1.39031	-0.451537	hsa_circRNA_101693
ASCRP003593	0.6279	0.212826	-1.3893	-0.41922	hsa_circRNA_103295
ASCRP002376	0.6287	0.213329	-1.38756	-0.487018	hsa_circRNA_102041
ASCRP002557	0.633	0.215057	-1.38161	-0.598544	hsa_circRNA_102229
ASCRP002450	0.6335	0.215632	-1.37965	-0.321395	hsa_circRNA_102118
ASCRP003515	0.6335	0.215959	-1.37853	-0.315276	hsa_circRNA_103217
ASCRP001000	0.6335	0.21601	-1.37835	-0.487068	hsa_circRNA_100626
ASCRP001062	0.6335	0.216404	1.37701	1.97502	hsa_circRNA_100688
ASCRP004946	0.6335	0.216445	-1.37687	-0.51994	hsa_circRNA_104694
ASCRP003334	0.6352	0.217452	-1.37344	-0.366243	hsa_circRNA_103028
ASCRP000768	0.6352	0.217647	-1.37278	-0.341002	hsa_circRNA_100383
ASCRP003548	0.6352	0.217791	1.37229	1.68728	hsa_circRNA_103250
ASCRP000112	0.6357	0.218906	1.36852	0.64276	hsa_circRNA_000757
ASCRP004173	0.6357	0.219247	-1.36737	-0.34309	hsa_circRNA_103893
ASCRP002304	0.6357	0.219287	-1.36723	-0.339913	hsa_circRNA_101964
ASCRP002847	0.6357	0.219318	1.36713	0.938906	hsa_circRNA_102534
ASCRP002254	0.6357	0.219327	-1.3671	-0.289492	hsa_circRNA_101912
ASCRP002235	0.6357	0.219426	-1.36677	-0.514186	hsa_circRNA_101893
ASCRP000691	0.6382	0.220542	1.36302	0.469112	hsa_circRNA_100304
ASCRP004257	0.6408	0.221997	1.35815	0.452545	hsa_circRNA_103977
ASCRP000871	0.6408	0.222091	-1.35784	-0.298148	hsa_circRNA_100488
ASCRP000808	0.6408	0.222376	-1.35689	-0.497106	hsa_circRNA_100425
ASCRP000497	0.6408	0.222836	-1.35536	-0.514271	hsa_circRNA_100107
ASCRP001868	0.6408	0.222921	-1.35508	-0.605723	hsa_circRNA_101517
ASCRP003027	0.6408	0.22339	1.35352	0.294382	hsa_circRNA_102715
ASCRP005143	0.6408	0.223634	-1.35271	-0.371074	hsa_circRNA_104896
ASCRP004088	0.6408	0.223785	-1.35221	-0.255447	hsa_circRNA_103798
ASCRP003407	0.6408	0.223844	-1.35202	-0.361914	hsa_circRNA_103103
ASCRP004329	0.6408	0.224058	-1.35131	-0.525151	hsa_circRNA_104055
ASCRP005283	0.6408	0.224214	1.35079	0.353827	hsa_circRNA_105036
ASCRP002554	0.6436	0.225433	-1.34678	-0.298624	hsa_circRNA_102226
ASCRP004619	0.6441	0.225862	1.34537	1.05146	hsa_circRNA_104357
ASCRP002599	0.6458	0.226711	-1.34259	-0.349952	hsa_circRNA_102271
ASCRP003935	0.6538	0.23031	-1.3309	-0.38085	hsa_circRNA_103641
ASCRP000410	0.6538	0.230435	-1.33049	-0.443311	hsa_circRNA_100020
ASCRP001084	0.6538	0.230513	-1.33024	-0.281591	hsa_circRNA_100710
ASCRP002717	0.6538	0.23075	-1.32948	-0.26123	hsa_circRNA_102398
ASCRP002582	0.6538	0.230808	-1.32929	-0.479402	hsa_circRNA_102254
ASCRP000215	0.6551	0.231715	1.32638	0.606695	hsa_circRNA_001170
ASCRP002417	0.6551	0.231907	-1.32577	-0.782378	hsa_circRNA_102082
ASCRP002121	0.6551	0.232042	-1.32533	-0.290715	hsa_circRNA_101775
ASCRP002694	0.6558	0.232773	-1.32299	-0.287001	hsa_circRNA_102375
ASCRP004149	0.6558	0.232791	-1.32294	-0.492919	hsa_circRNA_103861
ASCRP002424	0.6577	0.233728	1.31995	1.13315	hsa_circRNA_102089
ASCRP003648	0.6598	0.234912	-1.31619	-0.261327	hsa_circRNA_103350
ASCRP002651	0.6598	0.234987	-1.31595	-0.859703	hsa_circRNA_102332
ASCRP003223	0.6598	0.235328	-1.31487	-0.396232	hsa_circRNA_102915
ASCRP004071	0.6598	0.235512	1.31429	1.27195	hsa_circRNA_103781
ASCRP002105	0.66	0.235822	-1.31331	-0.413481	hsa_circRNA_101759
ASCRP004145	0.6601	0.236349	1.31165	0.456576	hsa_circRNA_103856
ASCRP005338	0.6601	0.236651	-1.3107	-0.302684	hsa_circRNA_400042
ASCRP002862	0.6601	0.236706	-1.31052	-0.32606	hsa_circRNA_102549
ASCRP002631	0.6601	0.236897	-1.30992	-0.29545	hsa_circRNA_102312
ASCRP002974	0.6619	0.23818	-1.3059	-0.476907	hsa_circRNA_102661
ASCRP001716	0.6619	0.238186	-1.30588	-0.530864	hsa_circRNA_101357
ASCRP003256	0.6619	0.238298	-1.30553	-0.263654	hsa_circRNA_102949
ASCRP002260	0.6628	0.238901	-1.30364	-0.247145	hsa_circRNA_101918
ASCRP004332	0.6653	0.240294	1.29931	0.823836	hsa_circRNA_104058
ASCRP001423	0.6653	0.240315	1.29924	1.21487	hsa_circRNA_101055
ASCRP002185	0.667	0.241205	1.29648	1.28613	hsa_circRNA_101842
ASCRP000832	0.6676	0.241677	-1.29502	-0.429811	hsa_circRNA_100449
ASCRP001491	0.6678	0.242	-1.29402	-0.364149	hsa_circRNA_101124
ASCRP003486	0.6718	0.243954	-1.28801	-0.453739	hsa_circRNA_103188
ASCRP005234	0.6718	0.24399	-1.2879	-0.292798	hsa_circRNA_104987
ASCRP005340	0.6727	0.244587	1.28608	0.374251	hsa_circRNA_400044
ASCRP002844	0.673	0.244936	1.28501	0.933603	hsa_circRNA_102531
ASCRP003066	0.6775	0.246924	1.27896	0.444099	hsa_circRNA_102754
ASCRP001149	0.6775	0.247111	-1.27839	-0.259865	hsa_circRNA_100775
ASCRP000945	0.6777	0.247457	1.27735	1.0967	hsa_circRNA_100565
ASCRP000789	0.6783	0.247918	-1.27595	-0.378733	hsa_circRNA_100405
ASCRP003487	0.6783	0.248198	-1.27511	-0.550147	hsa_circRNA_103189
ASCRP000414	0.6787	0.2487	-1.2736	-0.31627	hsa_circRNA_100024
ASCRP004349	0.6787	0.248909	1.27296	1.1546	hsa_circRNA_104075
ASCRP001887	0.6787	0.249132	-1.27229	-0.318769	hsa_circRNA_101536
ASCRP003032	0.6791	0.249566	1.27099	0.818942	hsa_circRNA_102720
ASCRP000594	0.6822	0.250955	1.26683	1.57938	hsa_circRNA_100205
ASCRP003846	0.6837	0.251979	-1.26377	-0.315231	hsa_circRNA_103548
ASCRP000907	0.6837	0.252042	-1.26358	-0.257692	hsa_circRNA_100526
ASCRP004502	0.687	0.253653	-1.2588	-0.341319	hsa_circRNA_104230
ASCRP004062	0.687	0.253794	-1.25838	-0.259032	hsa_circRNA_103772
ASCRP002905	0.6871	0.254247	-1.25704	-0.305737	hsa_circRNA_102592
ASCRP002155	0.6871	0.254359	-1.25671	-0.401102	hsa_circRNA_101810
ASCRP002035	0.6929	0.257217	-1.24831	-0.440069	hsa_circRNA_101688
ASCRP002200	0.6929	0.257624	-1.24712	-0.406699	hsa_circRNA_101857
ASCRP003365	0.6929	0.257766	1.2467	1.27062	hsa_circRNA_103060
ASCRP001878	0.6929	0.258005	-1.24601	-0.31513	hsa_circRNA_101527
ASCRP004244	0.6929	0.258033	-1.24592	-0.277224	hsa_circRNA_103964
ASCRP004905	0.6929	0.258137	-1.24562	-0.526661	hsa_circRNA_104652
ASCRP004530	0.6933	0.258582	-1.24432	-0.392887	hsa_circRNA_104259
ASCRP001837	0.6943	0.259422	-1.24188	-0.37669	hsa_circRNA_101486
ASCRP002827	0.6943	0.259466	1.24175	1.12047	hsa_circRNA_102513
ASCRP005200	0.6965	0.260573	-1.23855	-0.219757	hsa_circRNA_104953
ASCRP002191	0.698	0.261571	-1.23566	-0.267109	hsa_circRNA_101848
ASCRP002451	0.698	0.261676	1.23536	0.598012	hsa_circRNA_102119
ASCRP001144	0.7005	0.26298	1.23161	1.22653	hsa_circRNA_100770
ASCRP001222	0.7005	0.263148	-1.23113	-0.556957	hsa_circRNA_100848
ASCRP000909	0.7015	0.263803	-1.22925	-0.451335	hsa_circRNA_100528
ASCRP002503	0.7016	0.264135	-1.2283	-0.46527	hsa_circRNA_102171
ASCRP002698	0.7023	0.265079	-1.22561	-0.466088	hsa_circRNA_102379
ASCRP004722	0.7023	0.265087	-1.22559	-0.247641	hsa_circRNA_104468
ASCRP003588	0.7023	0.26521	1.22524	1.19461	hsa_circRNA_103290
ASCRP000144	0.7038	0.266304	-1.22212	-0.948082	hsa_circRNA_000881
ASCRP004279	0.7038	0.266351	1.22199	0.498926	hsa_circRNA_103999
ASCRP003507	0.7042	0.266765	-1.22082	-0.390326	hsa_circRNA_103209
ASCRP000538	0.7081	0.268776	-1.21513	-0.239788	hsa_circRNA_100149
ASCRP001114	0.7081	0.268798	-1.21507	-0.494036	hsa_circRNA_100740
ASCRP003826	0.7091	0.269449	1.21324	0.570911	hsa_circRNA_103528
ASCRP001539	0.7095	0.270002	-1.21169	-0.306276	hsa_circRNA_101176
ASCRP003983	0.7095	0.270142	-1.2113	-0.391262	hsa_circRNA_103689
ASCRP001671	0.7115	0.271417	-1.20773	-0.233621	hsa_circRNA_101312
ASCRP003853	0.7115	0.271483	1.20755	1.43129	hsa_circRNA_103555
ASCRP003192	0.7126	0.272177	1.20561	0.423188	hsa_circRNA_102884
ASCRP001462	0.7136	0.272981	-1.20337	-0.574285	hsa_circRNA_101094
ASCRP001550	0.7136	0.273091	-1.20307	-0.232575	hsa_circRNA_101187
ASCRP004096	0.7155	0.27413	-1.20019	-0.452006	hsa_circRNA_103806
ASCRP003316	0.7194	0.275885	-1.19534	-0.241758	hsa_circRNA_103010
ASCRP000156	0.7224	0.277339	-1.19135	-0.258922	hsa_circRNA_000936
ASCRP001020	0.7242	0.278373	1.18851	0.946102	hsa_circRNA_100646
ASCRP000082	0.7242	0.278621	-1.18784	-0.405547	hsa_circRNA_000623
ASCRP004869	0.7242	0.278884	1.18712	0.528736	hsa_circRNA_104616
ASCRP001672	0.7244	0.279296	-1.186	-0.525999	hsa_circRNA_101313
ASCRP003817	0.7244	0.279612	1.18514	1.79707	hsa_circRNA_103519
ASCRP005005	0.7244	0.279779	1.18468	1.09934	hsa_circRNA_104755
ASCRP003822	0.7277	0.281595	-1.17975	-0.372492	hsa_circRNA_103524
ASCRP004215	0.7277	0.282208	-1.1781	-0.304335	hsa_circRNA_103935
ASCRP004438	0.7277	0.282287	1.17788	1.26266	hsa_circRNA_104165
ASCRP003518	0.7277	0.282629	-1.17696	-0.424089	hsa_circRNA_103220
ASCRP001430	0.7277	0.282672	1.17684	0.448768	hsa_circRNA_101062
ASCRP000438	0.7277	0.282769	-1.17658	-0.425012	hsa_circRNA_100048
ASCRP000877	0.7282	0.28332	-1.1751	-0.337155	hsa_circRNA_100494
ASCRP003777	0.7282	0.283536	-1.17452	-0.405844	hsa_circRNA_103479
ASCRP001656	0.7285	0.284007	-1.17325	-0.799209	hsa_circRNA_101296
ASCRP001761	0.7285	0.284284	-1.17251	-0.255862	hsa_circRNA_101402
ASCRP001929	0.7285	0.284516	-1.17189	-0.378974	hsa_circRNA_101579
ASCRP000697	0.7317	0.286255	-1.16723	-0.232419	hsa_circRNA_100310
ASCRP002541	0.7317	0.28634	1.16701	0.258816	hsa_circRNA_102213
ASCRP003682	0.7336	0.287344	1.16433	0.974161	hsa_circRNA_103384
ASCRP001043	0.7336	0.287761	-1.16322	-0.4911	hsa_circRNA_100669
ASCRP002487	0.7336	0.287923	-1.16279	-0.213143	hsa_circRNA_102155
ASCRP004899	0.7337	0.288246	1.16193	0.384322	hsa_circRNA_104646
ASCRP000545	0.7354	0.289385	-1.15892	-0.434536	hsa_circRNA_100156
ASCRP002231	0.7354	0.289498	1.15862	0.369907	hsa_circRNA_101889
ASCRP002718	0.7372	0.290487	1.15601	0.33067	hsa_circRNA_102399
ASCRP000503	0.7373	0.290832	1.1551	0.308656	hsa_circRNA_100113
ASCRP001317	0.738	0.291375	-1.15368	-0.362523	hsa_circRNA_100945
ASCRP003883	0.7386	0.292147	1.15165	0.407751	hsa_circRNA_103588
ASCRP000178	0.7386	0.29226	-1.15135	-0.467509	hsa_circRNA_001030
ASCRP003838	0.7386	0.292686	-1.15023	-0.444191	hsa_circRNA_103540
ASCRP003047	0.7386	0.293018	-1.14936	-0.299649	hsa_circRNA_102735
ASCRP002490	0.7386	0.29306	-1.14925	-0.360339	hsa_circRNA_102158
ASCRP000150	0.7387	0.293393	-1.14838	-0.77303	hsa_circRNA_000911
ASCRP004842	0.7392	0.29391	-1.14704	-0.335489	hsa_circRNA_104589
ASCRP002903	0.7392	0.29426	-1.14612	-0.357403	hsa_circRNA_102590
ASCRP004571	0.7392	0.295023	1.14414	0.452275	hsa_circRNA_104307
ASCRP002439	0.7392	0.295413	1.14312	0.441014	hsa_circRNA_102106
ASCRP000110	0.7392	0.295443	-1.14304	-0.377754	hsa_circRNA_000750
ASCRP005119	0.7392	0.2956	-1.14264	-0.533213	hsa_circRNA_104872
ASCRP002284	0.7392	0.29588	-1.14191	-0.554232	hsa_circRNA_101943
ASCRP003827	0.7392	0.29618	1.14113	1.12974	hsa_circRNA_103529
ASCRP003467	0.7392	0.296185	-1.14112	-0.458056	hsa_circRNA_103166
ASCRP004254	0.7392	0.297133	-1.13866	-0.382823	hsa_circRNA_103974
ASCRP001947	0.7392	0.297348	-1.13811	-0.24687	hsa_circRNA_101597
ASCRP001011	0.7392	0.297526	-1.13765	-0.341253	hsa_circRNA_100637
ASCRP000501	0.7392	0.297718	-1.13715	-0.501051	hsa_circRNA_100111
ASCRP000821	0.7392	0.297917	1.13664	1.17528	hsa_circRNA_100438
ASCRP003268	0.7392	0.297925	-1.13662	-0.286611	hsa_circRNA_102961
ASCRP003703	0.742	0.299725	1.13199	1.41425	hsa_circRNA_103405
ASCRP001684	0.742	0.300387	-1.13029	-0.291016	hsa_circRNA_101325
ASCRP000954	0.742	0.300433	1.13017	0.348711	hsa_circRNA_100575
ASCRP005394	0.742	0.30067	-1.12956	-0.725224	hsa_circRNA_400101
ASCRP002880	0.742	0.300706	-1.12947	-0.427713	hsa_circRNA_102567
ASCRP001255	0.742	0.30146	-1.12754	-0.418916	hsa_circRNA_100882
ASCRP005164	0.742	0.301618	1.12714	1.33703	hsa_circRNA_104917
ASCRP004141	0.742	0.301642	1.12708	0.460056	hsa_circRNA_103852
ASCRP000086	0.742	0.301937	1.12633	1.26394	hsa_circRNA_000638
ASCRP004078	0.742	0.301952	-1.12629	-0.323998	hsa_circRNA_103788
ASCRP001538	0.7427	0.30253	1.12481	0.725672	hsa_circRNA_101175
ASCRP004193	0.743	0.303035	-1.12353	-0.234514	hsa_circRNA_103913
ASCRP001644	0.743	0.303244	-1.123	-0.340459	hsa_circRNA_101283
ASCRP004720	0.7446	0.304182	-1.12062	-0.403578	hsa_circRNA_104466
ASCRP000453	0.7486	0.306684	-1.11429	-0.244836	hsa_circRNA_100063
ASCRP004515	0.7486	0.306753	-1.11412	-0.274401	hsa_circRNA_104244
ASCRP001779	0.7486	0.306934	-1.11366	-0.253624	hsa_circRNA_101420
ASCRP004596	0.7486	0.307481	-1.11229	-0.31098	hsa_circRNA_104333
ASCRP004116	0.7486	0.307674	1.1118	0.340253	hsa_circRNA_103826
ASCRP005049	0.7486	0.307749	1.11162	0.403376	hsa_circRNA_104800
ASCRP005365	0.7486	0.307874	1.1113	0.674681	hsa_circRNA_400071
ASCRP003963	0.7494	0.308501	-1.10973	-0.449495	hsa_circRNA_103669
ASCRP004971	0.7501	0.309205	-1.10797	-0.365358	hsa_circRNA_104720
ASCRP003287	0.7501	0.309381	1.10753	0.747078	hsa_circRNA_102980
ASCRP002782	0.7516	0.310427	1.10492	1.27712	hsa_circRNA_102465
ASCRP002504	0.7516	0.310695	1.10425	0.292064	hsa_circRNA_102172
ASCRP003864	0.7516	0.310882	-1.10378	-0.266406	hsa_circRNA_103566
ASCRP004605	0.7518	0.311535	-1.10216	-0.51105	hsa_circRNA_104342
ASCRP001745	0.7518	0.311556	-1.10211	-0.366311	hsa_circRNA_101386
ASCRP000051	0.752	0.311948	1.10113	1.74744	hsa_circRNA_000455
ASCRP003193	0.752	0.312216	-1.10047	-0.466406	hsa_circRNA_102885
ASCRP001383	0.7547	0.313808	-1.09653	-0.238379	hsa_circRNA_101013
ASCRP003196	0.7547	0.313936	-1.09621	-0.438733	hsa_circRNA_102888
ASCRP001698	0.7565	0.314952	1.0937	0.490957	hsa_circRNA_101339
ASCRP002243	0.7566	0.315437	1.09251	0.253166	hsa_circRNA_101901
ASCRP001283	0.7566	0.315604	-1.0921	-0.351736	hsa_circRNA_100910
ASCRP003712	0.7572	0.316127	-1.09081	-0.306516	hsa_circRNA_103414
ASCRP005259	0.7592	0.317661	1.08706	0.365476	hsa_circRNA_105012
ASCRP001168	0.7592	0.317786	1.08675	0.352208	hsa_circRNA_100794
ASCRP001860	0.7592	0.318097	-1.08599	-0.437014	hsa_circRNA_101509
ASCRP000786	0.7592	0.318407	1.08523	0.434928	hsa_circRNA_100402
ASCRP004647	0.7592	0.319089	1.08357	0.594236	hsa_circRNA_104387
ASCRP002459	0.7592	0.319272	1.08312	0.358672	hsa_circRNA_102127
ASCRP003852	0.7592	0.319345	-1.08295	-0.564888	hsa_circRNA_103554
ASCRP001630	0.7592	0.319449	-1.08269	-0.420727	hsa_circRNA_101269
ASCRP001495	0.7592	0.319917	-1.08155	-0.29032	hsa_circRNA_101128
ASCRP002374	0.7592	0.319933	1.08152	0.450916	hsa_circRNA_102039
ASCRP004136	0.7595	0.320678	-1.0797	-0.219613	hsa_circRNA_103847
ASCRP004684	0.7595	0.320733	1.07957	0.508176	hsa_circRNA_104428
ASCRP004237	0.7595	0.320962	1.07902	0.371142	hsa_circRNA_103957
ASCRP000773	0.761	0.321965	1.07659	0.972163	hsa_circRNA_100388
ASCRP004098	0.761	0.322194	-1.07603	-0.390476	hsa_circRNA_103808
ASCRP002176	0.761	0.32271	1.07479	0.78386	hsa_circRNA_101832
ASCRP004144	0.761	0.322786	1.0746	0.569442	hsa_circRNA_103855
ASCRP000664	0.7614	0.323518	1.07284	0.354499	hsa_circRNA_100276
ASCRP004548	0.7614	0.323544	-1.07278	-0.756777	hsa_circRNA_104283
ASCRP003070	0.7619	0.324064	1.07152	0.449997	hsa_circRNA_102759
ASCRP000061	0.7619	0.324348	-1.07084	-0.272082	hsa_circRNA_000526
ASCRP000953	0.763	0.325419	1.06827	0.414175	hsa_circRNA_100574
ASCRP000734	0.763	0.325441	-1.06822	-0.208178	hsa_circRNA_100349
ASCRP004004	0.7634	0.326035	1.06679	0.44487	hsa_circRNA_103711
ASCRP003245	0.7634	0.326464	-1.06577	-0.329013	hsa_circRNA_102938
ASCRP002545	0.7634	0.326496	-1.06569	-0.472251	hsa_circRNA_102217
ASCRP000011	0.7638	0.32729	-1.06379	-0.397454	hsa_circRNA_000095
ASCRP004536	0.7638	0.327357	1.06363	0.290508	hsa_circRNA_104266
ASCRP004309	0.7638	0.327537	-1.0632	-0.231298	hsa_circRNA_104034
ASCRP000570	0.7642	0.328421	-1.0611	-0.379301	hsa_circRNA_100181
ASCRP002764	0.7642	0.328562	-1.06076	-0.755064	hsa_circRNA_102445
ASCRP002022	0.7642	0.328622	-1.06062	-0.194519	hsa_circRNA_101675
ASCRP003932	0.7645	0.329313	1.05898	0.309529	hsa_circRNA_103637
ASCRP002857	0.7645	0.329346	-1.0589	-0.355117	hsa_circRNA_102544
ASCRP002568	0.7654	0.330465	-1.05624	-0.209373	hsa_circRNA_102240
ASCRP000164	0.7654	0.330823	1.0554	0.43714	hsa_circRNA_000959
ASCRP004095	0.7654	0.331361	-1.05412	-0.328103	hsa_circRNA_103805
ASCRP000990	0.7654	0.331784	-1.05313	-0.22111	hsa_circRNA_100615
ASCRP004026	0.7654	0.332656	-1.05107	-0.273523	hsa_circRNA_103735
ASCRP001095	0.7654	0.333037	1.05017	0.454511	hsa_circRNA_100721
ASCRP002774	0.7654	0.333075	1.05008	0.706084	hsa_circRNA_102456
ASCRP001282	0.7654	0.333084	-1.05006	-0.343305	hsa_circRNA_100909
ASCRP003304	0.7654	0.333447	1.04921	0.383151	hsa_circRNA_102998
ASCRP003654	0.7654	0.333481	1.04913	0.279196	hsa_circRNA_103356
ASCRP002004	0.7654	0.333641	1.04875	1.40029	hsa_circRNA_101656
ASCRP003346	0.7654	0.333874	-1.04821	-0.464435	hsa_circRNA_103041
ASCRP005077	0.7654	0.333936	-1.04806	-0.325565	hsa_circRNA_104829
ASCRP004931	0.7654	0.334217	1.0474	1.47765	hsa_circRNA_104678
ASCRP002350	0.7654	0.334291	-1.04723	-0.325908	hsa_circRNA_102014
ASCRP001008	0.7654	0.334786	-1.04607	-0.339555	hsa_circRNA_100634
ASCRP000991	0.7654	0.334818	-1.04599	-0.293659	hsa_circRNA_100616
ASCRP001911	0.7655	0.335308	-1.04484	-0.299475	hsa_circRNA_101560
ASCRP004483	0.7655	0.33546	-1.04449	-0.326012	hsa_circRNA_104210
ASCRP003061	0.768	0.336979	1.04094	0.399414	hsa_circRNA_102749
ASCRP004074	0.768	0.337399	1.03996	0.641429	hsa_circRNA_103784
ASCRP004422	0.768	0.337448	-1.03985	-0.306794	hsa_circRNA_104149
ASCRP005316	0.7683	0.338488	-1.03743	-0.407177	hsa_circRNA_400020
ASCRP002218	0.7683	0.338778	1.03676	0.34762	hsa_circRNA_101876
ASCRP003234	0.7683	0.339203	-1.03577	-0.393599	hsa_circRNA_102927
ASCRP004120	0.7683	0.339841	-1.03429	-0.536454	hsa_circRNA_103830
ASCRP005366	0.7683	0.339892	1.03417	1.53159	hsa_circRNA_400072
ASCRP003491	0.7683	0.340315	-1.0332	-0.336192	hsa_circRNA_103193
ASCRP000192	0.7683	0.340612	1.03251	0.832392	hsa_circRNA_001067
ASCRP001185	0.7683	0.340722	-1.03225	-0.218814	hsa_circRNA_100811
ASCRP000647	0.7683	0.341036	-1.03153	-0.242966	hsa_circRNA_100259
ASCRP004616	0.7683	0.341221	-1.0311	-0.350927	hsa_circRNA_104354
ASCRP003742	0.7683	0.341508	-1.03044	-0.783705	hsa_circRNA_103444
ASCRP001227	0.7683	0.34173	-1.02993	-0.604246	hsa_circRNA_100853
ASCRP002086	0.7683	0.34205	-1.02919	-0.367313	hsa_circRNA_101740
ASCRP002386	0.7683	0.342421	1.02834	0.588801	hsa_circRNA_102051
ASCRP003489	0.7683	0.342435	-1.02831	-0.46383	hsa_circRNA_103191
ASCRP000880	0.7683	0.342537	1.02807	0.802843	hsa_circRNA_100498
ASCRP002448	0.7683	0.342687	1.02773	0.474527	hsa_circRNA_102116
ASCRP000984	0.7686	0.343133	-1.0267	-0.301075	hsa_circRNA_100609
ASCRP002542	0.7693	0.343978	-1.02476	-0.314736	hsa_circRNA_102214
ASCRP003006	0.7693	0.344334	-1.02395	-0.286945	hsa_circRNA_102694
ASCRP001167	0.7693	0.34446	1.02366	0.371793	hsa_circRNA_100793
ASCRP001984	0.7693	0.344671	-1.02318	-0.28341	hsa_circRNA_101635
ASCRP002117	0.7717	0.346027	1.02008	0.363138	hsa_circRNA_101771
ASCRP002358	0.7722	0.346561	-1.01886	-0.251784	hsa_circRNA_102023
ASCRP004348	0.7722	0.347027	1.0178	0.37846	hsa_circRNA_104074
ASCRP002757	0.7722	0.347175	1.01746	0.712009	hsa_circRNA_102438
ASCRP003059	0.7724	0.347749	-1.01616	-0.330837	hsa_circRNA_102747
ASCRP001805	0.7724	0.347851	1.01592	0.449329	hsa_circRNA_101448
ASCRP002109	0.7731	0.34885	-1.01366	-0.314277	hsa_circRNA_101763
ASCRP003262	0.7731	0.34901	1.01329	1.02237	hsa_circRNA_102955
ASCRP001162	0.7731	0.349074	1.01315	0.514601	hsa_circRNA_100788
ASCRP002143	0.7731	0.349371	-1.01248	-0.549482	hsa_circRNA_101798
ASCRP001691	0.7732	0.34973	1.01167	0.475637	hsa_circRNA_101332
ASCRP002415	0.7733	0.35021	-1.01058	-0.204187	hsa_circRNA_102080
ASCRP001548	0.7733	0.350731	-1.0094	-0.394721	hsa_circRNA_101185
ASCRP001724	0.7733	0.35076	-1.00934	-0.391495	hsa_circRNA_101365
ASCRP002759	0.7733	0.350969	-1.00886	-0.357097	hsa_circRNA_102440
ASCRP001589	0.7734	0.351365	1.00797	1.00698	hsa_circRNA_101226
ASCRP002279	0.7734	0.352141	-1.00622	-0.469287	hsa_circRNA_101938
ASCRP000332	0.7734	0.352214	1.00606	0.339806	hsa_circRNA_001785
ASCRP000407	0.7734	0.352225	-1.00604	-0.225334	hsa_circRNA_100017
ASCRP003876	0.7741	0.353536	1.00309	0.692264	hsa_circRNA_103580
ASCRP002790	0.7741	0.353794	1.00251	1.45605	hsa_circRNA_102473
ASCRP003546	0.7741	0.353906	-1.00226	-0.288307	hsa_circRNA_103248
ASCRP000461	0.7741	0.354248	-1.0015	-0.234372	hsa_circRNA_100071
ASCRP004442	0.7741	0.354276	1.00143	0.402637	hsa_circRNA_104169
ASCRP002343	0.7741	0.354701	-1.00048	-0.303586	hsa_circRNA_102007
ASCRP002934	0.7741	0.355094	-0.999601	-0.253981	hsa_circRNA_102621
ASCRP004997	0.7741	0.355273	0.999203	0.54674	hsa_circRNA_104747
ASCRP000372	0.7741	0.355378	0.998967	1.58663	hsa_circRNA_002044
ASCRP001674	0.7741	0.355565	-0.99855	-0.225118	hsa_circRNA_101315
ASCRP001210	0.778	0.357978	0.993178	1.17107	hsa_circRNA_100836
ASCRP002189	0.778	0.357978	0.993178	0.532829	hsa_circRNA_101846
ASCRP000116	0.7792	0.359031	-0.990842	-0.520944	hsa_circRNA_000780
ASCRP001036	0.7792	0.360307	0.988018	0.394105	hsa_circRNA_100662
ASCRP000299	0.7792	0.360416	-0.987777	-0.310993	hsa_circRNA_001578
ASCRP001978	0.7792	0.360427	-0.987753	-0.36165	hsa_circRNA_101629
ASCRP004434	0.7792	0.360446	-0.987712	-0.251668	hsa_circRNA_104161
ASCRP000348	0.7792	0.360685	-0.987183	-0.326416	hsa_circRNA_001896
ASCRP004393	0.7792	0.360756	-0.987027	-0.19173	hsa_circRNA_104120
ASCRP004224	0.7792	0.360983	0.986526	0.855868	hsa_circRNA_103944
ASCRP001415	0.7801	0.362117	-0.984027	-0.204907	hsa_circRNA_101045
ASCRP004577	0.7801	0.362232	-0.983774	-0.505002	hsa_circRNA_104314
ASCRP002765	0.7801	0.362307	-0.98361	-0.441345	hsa_circRNA_102446
ASCRP003430	0.7813	0.364619	-0.978535	-0.40524	hsa_circRNA_103126
ASCRP000097	0.7813	0.364876	0.977974	0.312621	hsa_circRNA_000679
ASCRP002233	0.7813	0.365067	-0.977555	-0.285781	hsa_circRNA_101891
ASCRP005085	0.7813	0.365326	-0.97699	-0.307726	hsa_circRNA_104837
ASCRP002211	0.7813	0.365392	-0.976845	-0.311549	hsa_circRNA_101868
ASCRP003144	0.7813	0.365438	-0.976745	-0.264729	hsa_circRNA_102836
ASCRP001427	0.7813	0.365764	0.976032	0.380402	hsa_circRNA_101059
ASCRP003258	0.7813	0.365798	0.975959	0.710841	hsa_circRNA_102951
ASCRP001154	0.7813	0.365866	0.975811	0.420219	hsa_circRNA_100780
ASCRP001544	0.7813	0.365916	-0.9757	-0.291635	hsa_circRNA_101181
ASCRP002223	0.7816	0.366447	-0.974543	-0.289154	hsa_circRNA_101881
ASCRP000997	0.7816	0.366874	0.973612	1.06726	hsa_circRNA_100623
ASCRP001041	0.7816	0.366974	-0.973394	-0.20532	hsa_circRNA_100667
ASCRP004843	0.7821	0.36799	-0.971184	-0.293327	hsa_circRNA_104590
ASCRP000876	0.7821	0.368044	-0.971067	-0.26954	hsa_circRNA_100493
ASCRP001435	0.7821	0.368312	-0.970484	-0.269618	hsa_circRNA_101067
ASCRP001393	0.7821	0.369034	-0.968918	-0.293586	hsa_circRNA_101023
ASCRP001710	0.7821	0.369044	0.968896	0.263356	hsa_circRNA_101351
ASCRP000123	0.7821	0.369295	-0.968351	-0.201999	hsa_circRNA_000798
ASCRP000311	0.7821	0.369815	-0.967225	-0.717303	hsa_circRNA_001654
ASCRP005068	0.7821	0.370269	-0.966243	-0.299531	hsa_circRNA_104819
ASCRP004707	0.7821	0.370659	0.9654	0.459604	hsa_circRNA_104453
ASCRP001614	0.7821	0.371304	-0.964007	-0.51654	hsa_circRNA_101251
ASCRP002039	0.7821	0.371776	0.962989	0.485641	hsa_circRNA_101692
ASCRP000746	0.7821	0.371859	-0.96281	-0.210612	hsa_circRNA_100361
ASCRP000096	0.7821	0.371905	0.962712	0.690963	hsa_circRNA_000676
ASCRP003118	0.7821	0.372006	-0.962493	-0.241975	hsa_circRNA_102809
ASCRP002360	0.7821	0.372023	0.962458	0.447846	hsa_circRNA_102025
ASCRP000199	0.7821	0.372073	0.96235	0.508402	hsa_circRNA_001096
ASCRP003847	0.783	0.372814	-0.960755	-0.221864	hsa_circRNA_103549
ASCRP003524	0.7832	0.373252	0.959812	1.02598	hsa_circRNA_103226
ASCRP004477	0.7843	0.374442	-0.957259	-0.32905	hsa_circRNA_104204
ASCRP000795	0.7843	0.374498	0.957139	1.42598	hsa_circRNA_100412
ASCRP002889	0.7843	0.375064	0.955925	0.782643	hsa_circRNA_102576
ASCRP003338	0.7843	0.375327	-0.955362	-0.296365	hsa_circRNA_103032
ASCRP005386	0.7843	0.376056	-0.953804	-0.204269	hsa_circRNA_400093
ASCRP000279	0.7843	0.376429	-0.953008	-0.388361	hsa_circRNA_001465
ASCRP000098	0.7843	0.376619	0.952602	0.934244	hsa_circRNA_000684
ASCRP002278	0.7843	0.376626	-0.952586	-0.169712	hsa_circRNA_101937
ASCRP002125	0.7843	0.376857	0.952094	0.760854	hsa_circRNA_101779
ASCRP002385	0.7843	0.377488	-0.950749	-0.39477	hsa_circRNA_102050
ASCRP004717	0.7843	0.377652	-0.9504	-0.252021	hsa_circRNA_104463
ASCRP003849	0.7843	0.3779	-0.94987	-0.295194	hsa_circRNA_103551
ASCRP001133	0.7843	0.37795	-0.949765	-0.540383	hsa_circRNA_100759
ASCRP000303	0.7843	0.378032	0.94959	0.720869	hsa_circRNA_001594
ASCRP000879	0.7854	0.37886	-0.947829	-0.236552	hsa_circRNA_100497
ASCRP001981	0.7855	0.379417	-0.946647	-0.210821	hsa_circRNA_101632
ASCRP002569	0.7855	0.379815	0.945804	0.374735	hsa_circRNA_102241
ASCRP001235	0.7855	0.380056	-0.945293	-0.440538	hsa_circRNA_100861
ASCRP000836	0.7855	0.380152	0.945089	0.869328	hsa_circRNA_100453
ASCRP004701	0.786	0.380964	0.94337	0.731554	hsa_circRNA_104445
ASCRP000826	0.786	0.381155	-0.942965	-0.18694	hsa_circRNA_100443
ASCRP003171	0.786	0.381528	0.942178	0.589428	hsa_circRNA_102863
ASCRP002045	0.786	0.381829	0.941543	1.39089	hsa_circRNA_101698
ASCRP000473	0.786	0.381997	0.941187	0.947318	hsa_circRNA_100083
ASCRP003279	0.786	0.382248	0.940656	0.62003	hsa_circRNA_102972
ASCRP002080	0.7871	0.383706	0.937586	0.233414	hsa_circRNA_101734
ASCRP003745	0.7871	0.383791	-0.937407	-0.650606	hsa_circRNA_103447
ASCRP003713	0.7871	0.384018	-0.936929	-0.234773	hsa_circRNA_103415
ASCRP003768	0.7871	0.384129	-0.936697	-0.290641	hsa_circRNA_103470
ASCRP001207	0.7871	0.384926	-0.935023	-0.187984	hsa_circRNA_100833
ASCRP001626	0.7871	0.385085	0.934689	0.726683	hsa_circRNA_101264
ASCRP001651	0.7871	0.385633	0.93354	0.783474	hsa_circRNA_101291
ASCRP001995	0.7871	0.385689	-0.933423	-0.185072	hsa_circRNA_101646
ASCRP001340	0.7871	0.385812	0.933164	0.60817	hsa_circRNA_100968
ASCRP003816	0.7871	0.385871	-0.933041	-0.322757	hsa_circRNA_103518
ASCRP003982	0.7887	0.387064	-0.930545	-0.285274	hsa_circRNA_103688
ASCRP003188	0.7887	0.387306	0.93004	0.26871	hsa_circRNA_102880
ASCRP004370	0.7887	0.387643	-0.929335	-0.377752	hsa_circRNA_104097
ASCRP005374	0.7887	0.387865	-0.928873	-0.300499	hsa_circRNA_400080
ASCRP004789	0.7887	0.388173	-0.92823	-0.192843	hsa_circRNA_104535
ASCRP000818	0.79	0.389407	0.92566	0.539429	hsa_circRNA_100435
ASCRP001269	0.79	0.389675	0.925102	1.22632	hsa_circRNA_100896
ASCRP003536	0.79	0.390138	-0.924142	-0.472109	hsa_circRNA_103238
ASCRP003646	0.79	0.390398	-0.923602	-0.472088	hsa_circRNA_103348
ASCRP001420	0.79	0.390713	0.922947	0.307656	hsa_circRNA_101052
ASCRP004531	0.79	0.390915	-0.922529	-0.331243	hsa_circRNA_104260
ASCRP003651	0.79	0.39123	-0.921875	-0.254542	hsa_circRNA_103353
ASCRP004123	0.79	0.391307	0.921717	0.327534	hsa_circRNA_103833
ASCRP004885	0.79	0.391615	-0.921078	-0.416714	hsa_circRNA_104632
ASCRP000919	0.7906	0.392201	-0.919866	-0.185118	hsa_circRNA_100539
ASCRP005108	0.7924	0.393468	-0.917246	-0.331771	hsa_circRNA_104861
ASCRP000537	0.7924	0.393876	-0.916406	-0.184704	hsa_circRNA_100148
ASCRP003209	0.7924	0.394133	-0.915876	-0.196174	hsa_circRNA_102901
ASCRP002326	0.7924	0.39456	-0.914995	-0.329484	hsa_circRNA_101989
ASCRP003226	0.7924	0.394657	0.914796	0.677343	hsa_circRNA_102918
ASCRP000352	0.7929	0.395189	-0.913702	-0.233158	hsa_circRNA_001937
ASCRP000624	0.7937	0.396145	0.911738	0.67283	hsa_circRNA_100236
ASCRP000355	0.7937	0.396237	0.911548	0.419715	hsa_circRNA_001952
ASCRP002303	0.7939	0.396625	-0.910752	-0.206494	hsa_circRNA_101963
ASCRP001312	0.794	0.397504	-0.90895	-0.381267	hsa_circRNA_100939
ASCRP002309	0.794	0.397534	-0.908888	-0.196138	hsa_circRNA_101969
ASCRP004319	0.794	0.397665	-0.908622	-0.459635	hsa_circRNA_104045
ASCRP002705	0.794	0.397941	-0.908056	-0.277187	hsa_circRNA_102386
ASCRP000129	0.7941	0.398296	-0.907329	-0.318543	hsa_circRNA_000815
ASCRP000881	0.7965	0.399809	-0.904241	-0.221008	hsa_circRNA_100499
ASCRP004196	0.7968	0.400594	0.902643	0.756195	hsa_circRNA_103916
ASCRP001346	0.7968	0.401388	-0.901027	-0.224722	hsa_circRNA_100975
ASCRP003398	0.7968	0.4015	0.900799	0.272475	hsa_circRNA_103094
ASCRP004886	0.7968	0.401667	0.90046	0.240667	hsa_circRNA_104633
ASCRP000578	0.7968	0.401759	-0.900273	-0.198509	hsa_circRNA_100189
ASCRP001146	0.7968	0.402326	0.899121	0.594481	hsa_circRNA_100772
ASCRP001664	0.7968	0.402545	-0.898677	-0.288603	hsa_circRNA_101305
ASCRP001124	0.7968	0.403094	0.897564	0.984943	hsa_circRNA_100750
ASCRP002666	0.7968	0.403134	-0.897484	-0.221309	hsa_circRNA_102347
ASCRP000205	0.7968	0.403469	0.896806	0.429209	hsa_circRNA_001109
ASCRP001341	0.7968	0.40359	-0.89656	-0.271565	hsa_circRNA_100969
ASCRP000809	0.7968	0.403706	-0.896325	-0.217523	hsa_circRNA_100426
ASCRP000235	0.7973	0.404266	-0.895193	-0.308368	hsa_circRNA_001240
ASCRP000371	0.7973	0.405075	0.893559	0.786022	hsa_circRNA_002042
ASCRP001676	0.7973	0.405116	0.893477	0.306634	hsa_circRNA_101317
ASCRP002002	0.7973	0.40528	0.893145	0.294328	hsa_circRNA_101654
ASCRP003108	0.7973	0.405495	0.892711	0.415086	hsa_circRNA_102799
ASCRP004205	0.7988	0.407763	-0.888146	-0.225179	hsa_circRNA_103925
ASCRP005191	0.7988	0.407794	-0.888083	-0.309643	hsa_circRNA_104944
ASCRP004812	0.7988	0.407801	-0.888069	-0.179648	hsa_circRNA_104559
ASCRP002643	0.7988	0.407856	-0.887959	-0.6217	hsa_circRNA_102324
ASCRP000166	0.7988	0.408283	-0.887102	-0.241305	hsa_circRNA_000962
ASCRP001045	0.7988	0.408367	-0.886932	-0.366536	hsa_circRNA_100671
ASCRP004671	0.7988	0.408476	-0.886714	-0.29513	hsa_circRNA_104415
ASCRP002003	0.7992	0.408978	-0.885707	-0.20382	hsa_circRNA_101655
ASCRP003114	0.7993	0.409729	-0.884203	-0.22249	hsa_circRNA_102805
ASCRP003305	0.7993	0.410021	-0.88362	-0.329689	hsa_circRNA_102999
ASCRP002715	0.7993	0.410173	0.883315	0.543981	hsa_circRNA_102396
ASCRP000360	0.7993	0.410297	-0.883067	-0.254218	hsa_circRNA_001978
ASCRP000185	0.801	0.41147	-0.880724	-0.387609	hsa_circRNA_001049
ASCRP002799	0.8014	0.412391	0.878888	0.715764	hsa_circRNA_102482
ASCRP000412	0.8014	0.412541	0.878591	0.316438	hsa_circRNA_100022
ASCRP001959	0.8014	0.412923	-0.87783	-0.2071	hsa_circRNA_101610
ASCRP000007	0.8014	0.413511	-0.87666	-0.197719	hsa_circRNA_000046
ASCRP005326	0.8014	0.413634	0.876416	0.431515	hsa_circRNA_400030
ASCRP004602	0.8014	0.413912	0.875863	0.262466	hsa_circRNA_104339
ASCRP005152	0.8014	0.414355	0.874985	0.314626	hsa_circRNA_104905
ASCRP004932	0.8014	0.414456	-0.874783	-0.218945	hsa_circRNA_104679
ASCRP000292	0.8014	0.414554	0.87459	0.366988	hsa_circRNA_001543
ASCRP002058	0.8014	0.415674	0.872369	1.06927	hsa_circRNA_101711
ASCRP005192	0.8014	0.415688	0.872341	0.304858	hsa_circRNA_104945
ASCRP004821	0.8014	0.416774	-0.870193	-0.396124	hsa_circRNA_104568
ASCRP000574	0.8014	0.416932	-0.869881	-0.258312	hsa_circRNA_100185
ASCRP003882	0.8014	0.416979	0.869789	0.259947	hsa_circRNA_103587
ASCRP002174	0.8014	0.417086	-0.869578	-0.240379	hsa_circRNA_101830
ASCRP001532	0.8014	0.417317	0.869121	0.282664	hsa_circRNA_101169
ASCRP005086	0.8014	0.417609	0.868544	1.25826	hsa_circRNA_104838
ASCRP005377	0.8014	0.417963	-0.867846	-0.331154	hsa_circRNA_400083
ASCRP004036	0.8014	0.418203	-0.867372	-0.166839	hsa_circRNA_103745
ASCRP001722	0.8014	0.418221	0.867338	0.337673	hsa_circRNA_101363
ASCRP001171	0.8014	0.418322	0.867139	0.363504	hsa_circRNA_100797
ASCRP002489	0.8014	0.418557	-0.866675	-0.220552	hsa_circRNA_102157
ASCRP001281	0.8014	0.418847	-0.866104	-0.345874	hsa_circRNA_100908
ASCRP004514	0.8018	0.419394	-0.865027	-0.283922	hsa_circRNA_104243
ASCRP001225	0.8019	0.419776	0.864277	1.02228	hsa_circRNA_100851
ASCRP004575	0.8032	0.420875	0.862118	0.511613	hsa_circRNA_104311
ASCRP002340	0.8032	0.421068	-0.86174	-0.346072	hsa_circRNA_102003
ASCRP000310	0.8034	0.421588	-0.86072	-0.760574	hsa_circRNA_001653
ASCRP004705	0.8034	0.421826	-0.860253	-0.167075	hsa_circRNA_104451
ASCRP000844	0.8039	0.422409	-0.859112	-0.18368	hsa_circRNA_100461
ASCRP004022	0.8039	0.422692	0.858559	0.259542	hsa_circRNA_103731
ASCRP004850	0.8042	0.423353	0.857267	0.237985	hsa_circRNA_104597
ASCRP004499	0.8042	0.423492	0.856995	0.555337	hsa_circRNA_104227
ASCRP001731	0.8061	0.425491	-0.853097	-0.276476	hsa_circRNA_101372
ASCRP003306	0.8061	0.425575	-0.852934	-0.262316	hsa_circRNA_103000
ASCRP000452	0.8061	0.425762	-0.85257	-0.300247	hsa_circRNA_100062
ASCRP005368	0.8061	0.426174	0.85177	1.20654	hsa_circRNA_400074
ASCRP001771	0.8061	0.426548	-0.851043	-0.237274	hsa_circRNA_101412
ASCRP002608	0.8061	0.426658	-0.850828	-0.351905	hsa_circRNA_102289
ASCRP004476	0.8061	0.426985	-0.850193	-0.565035	hsa_circRNA_104203
ASCRP003652	0.8061	0.426994	0.850177	0.237793	hsa_circRNA_103354
ASCRP002064	0.8065	0.427771	-0.848668	-0.258487	hsa_circRNA_101717
ASCRP002339	0.8065	0.427972	0.84828	1.09191	hsa_circRNA_102002
ASCRP004269	0.8065	0.428154	-0.847927	-0.319103	hsa_circRNA_103989
ASCRP003307	0.807	0.428732	-0.846807	-0.255742	hsa_circRNA_103001
ASCRP002178	0.8073	0.429229	-0.845847	-0.196561	hsa_circRNA_101834
ASCRP005320	0.8079	0.429935	-0.844481	-0.609811	hsa_circRNA_400024
ASCRP000374	0.8079	0.430171	-0.844026	-0.237963	hsa_circRNA_002048
ASCRP000623	0.8081	0.430605	0.843189	0.264561	hsa_circRNA_100235
ASCRP004072	0.8081	0.430927	0.842568	0.773062	hsa_circRNA_103782
ASCRP004862	0.8089	0.43186	-0.84077	-0.254008	hsa_circRNA_104609
ASCRP002204	0.8089	0.43202	-0.840461	-0.220482	hsa_circRNA_101861
ASCRP004919	0.8089	0.432832	0.8389	0.845476	hsa_circRNA_104666
ASCRP001732	0.8089	0.43293	-0.838712	-0.360976	hsa_circRNA_101373
ASCRP003960	0.8089	0.433013	-0.838553	-0.175237	hsa_circRNA_103666
ASCRP003607	0.8089	0.433231	0.838133	0.689349	hsa_circRNA_103309
ASCRP002090	0.8092	0.433684	-0.837264	-0.491624	hsa_circRNA_101744
ASCRP004710	0.8105	0.434724	0.83527	0.807151	hsa_circRNA_104456
ASCRP001431	0.8125	0.436799	-0.8313	-0.241023	hsa_circRNA_101063
ASCRP004464	0.8125	0.437095	0.830735	0.301437	hsa_circRNA_104191
ASCRP003384	0.8125	0.437393	-0.830166	-0.333879	hsa_circRNA_103080
ASCRP002587	0.8125	0.437535	-0.829895	-0.2936	hsa_circRNA_102259
ASCRP003031	0.8125	0.437662	-0.829654	-0.408352	hsa_circRNA_102719
ASCRP002021	0.8125	0.437671	-0.829638	-0.413903	hsa_circRNA_101674
ASCRP002536	0.8136	0.438657	-0.827758	-0.290214	hsa_circRNA_102208
ASCRP003109	0.8136	0.438988	0.827128	0.33653	hsa_circRNA_102800
ASCRP000598	0.8136	0.43924	0.82665	0.652719	hsa_circRNA_100209
ASCRP002902	0.8144	0.439972	-0.825257	-0.326393	hsa_circRNA_102589
ASCRP002668	0.8146	0.440393	0.824459	0.286274	hsa_circRNA_102349
ASCRP001506	0.8147	0.440799	-0.823688	-0.315107	hsa_circRNA_101140
ASCRP005304	0.8148	0.441226	0.822878	0.596389	hsa_circRNA_400008
ASCRP001517	0.8148	0.442172	-0.821088	-0.238143	hsa_circRNA_101154
ASCRP003355	0.8148	0.442462	-0.820539	-0.186235	hsa_circRNA_103050
ASCRP002601	0.8148	0.44266	0.820164	0.374868	hsa_circRNA_102273
ASCRP003995	0.8148	0.442981	0.819556	0.280662	hsa_circRNA_103701
ASCRP001400	0.8148	0.443573	0.818439	0.870686	hsa_circRNA_101030
ASCRP001964	0.8148	0.443692	0.818214	0.54735	hsa_circRNA_101615
ASCRP004379	0.8148	0.443909	-0.817805	-0.35637	hsa_circRNA_104106
ASCRP005013	0.8148	0.44395	0.817727	0.239215	hsa_circRNA_104763
ASCRP003949	0.8148	0.444024	0.817586	0.57654	hsa_circRNA_103655
ASCRP002242	0.8156	0.44559	0.814636	0.158969	hsa_circRNA_101900
ASCRP002547	0.8156	0.445595	0.814627	0.688283	hsa_circRNA_102219
ASCRP003796	0.8156	0.445879	0.814091	0.266351	hsa_circRNA_103498
ASCRP003126	0.8156	0.446179	-0.813528	-0.378811	hsa_circRNA_102817
ASCRP000417	0.8156	0.4471	-0.811797	-0.269764	hsa_circRNA_100027
ASCRP001331	0.8156	0.44718	0.811647	0.234454	hsa_circRNA_100959
ASCRP003688	0.8156	0.447199	0.811611	1.02166	hsa_circRNA_103390
ASCRP002875	0.8156	0.447349	-0.811329	-0.323624	hsa_circRNA_102562
ASCRP003110	0.8156	0.447578	-0.8109	-0.319153	hsa_circRNA_102801
ASCRP002480	0.8156	0.447642	-0.810781	-0.366818	hsa_circRNA_102148
ASCRP004354	0.8164	0.448406	0.809348	0.527864	hsa_circRNA_104080
ASCRP002408	0.8171	0.44912	0.808011	0.791076	hsa_circRNA_102073
ASCRP005118	0.8177	0.449757	0.806819	0.308415	hsa_circRNA_104871
ASCRP000489	0.8187	0.450746	-0.804971	-0.183682	hsa_circRNA_100099
ASCRP004794	0.8187	0.45095	0.804591	0.736133	hsa_circRNA_104540
ASCRP000463	0.8191	0.451482	-0.803598	-0.252767	hsa_circRNA_100073
ASCRP002166	0.8191	0.451962	-0.802704	-0.182126	hsa_circRNA_101821
ASCRP004443	0.8191	0.452338	-0.802003	-0.297226	hsa_circRNA_104170
ASCRP005308	0.8191	0.453212	0.800378	0.495627	hsa_circRNA_400012
ASCRP001609	0.8191	0.45377	-0.79934	-0.351508	hsa_circRNA_101246
ASCRP002196	0.8191	0.453895	0.799108	0.859873	hsa_circRNA_101853
ASCRP003922	0.8191	0.454994	-0.797069	-0.394641	hsa_circRNA_103627
ASCRP000630	0.8191	0.455092	0.796887	0.294705	hsa_circRNA_100242
ASCRP000721	0.8191	0.45534	-0.796428	-0.214835	hsa_circRNA_100336
ASCRP005065	0.8191	0.455833	-0.795513	-0.172161	hsa_circRNA_104816
ASCRP000603	0.8191	0.456819	-0.793688	-0.265142	hsa_circRNA_100215
ASCRP001654	0.8191	0.457255	-0.792883	-0.260834	hsa_circRNA_101294
ASCRP002318	0.8191	0.457417	-0.792584	-0.217112	hsa_circRNA_101979
ASCRP004460	0.8191	0.457768	-0.791936	-0.245911	hsa_circRNA_104187
ASCRP004471	0.8191	0.457854	-0.791777	-0.200241	hsa_circRNA_104198
ASCRP003364	0.8191	0.45787	-0.791748	-0.348654	hsa_circRNA_103059
ASCRP004839	0.8191	0.458173	0.791188	0.774565	hsa_circRNA_104586
ASCRP005265	0.8191	0.458219	-0.791103	-0.246791	hsa_circRNA_105018
ASCRP002332	0.8191	0.45864	-0.790326	-0.294516	hsa_circRNA_101995
ASCRP000759	0.8191	0.458714	0.790189	0.255421	hsa_circRNA_100374
ASCRP004949	0.8191	0.458901	-0.789845	-0.216216	hsa_circRNA_104697
ASCRP002899	0.8191	0.458953	-0.789749	-0.228143	hsa_circRNA_102586
ASCRP002012	0.8191	0.4591	-0.789479	-0.316789	hsa_circRNA_101665
ASCRP005305	0.8191	0.459156	-0.789376	-0.463862	hsa_circRNA_400009
ASCRP001513	0.8191	0.459388	-0.788948	-0.239441	hsa_circRNA_101147
ASCRP000530	0.8191	0.459505	-0.788733	-0.173248	hsa_circRNA_100140
ASCRP002453	0.8191	0.460155	0.787537	0.362663	hsa_circRNA_102121
ASCRP003130	0.8191	0.460167	-0.787513	-0.258357	hsa_circRNA_102821
ASCRP004413	0.8199	0.461012	-0.78596	-0.403286	hsa_circRNA_104140
ASCRP003865	0.8199	0.461476	0.785108	0.253262	hsa_circRNA_103567
ASCRP003440	0.8199	0.461532	-0.785005	-0.410086	hsa_circRNA_103137
ASCRP002839	0.8204	0.462138	0.783894	0.769882	hsa_circRNA_102526
ASCRP003881	0.8243	0.464822	0.778981	0.255184	hsa_circRNA_103586
ASCRP004176	0.8243	0.466231	-0.77641	-0.206171	hsa_circRNA_103896
ASCRP001174	0.8243	0.466528	-0.775869	-0.214667	hsa_circRNA_100800
ASCRP002642	0.8243	0.466858	-0.775268	-0.311159	hsa_circRNA_102323
ASCRP001018	0.8243	0.467903	-0.773366	-0.22197	hsa_circRNA_100644
ASCRP004749	0.8243	0.467977	0.773231	0.856269	hsa_circRNA_104495
ASCRP001007	0.8243	0.46838	0.772499	0.350605	hsa_circRNA_100633
ASCRP003464	0.8243	0.468677	-0.77196	-0.153103	hsa_circRNA_103163
ASCRP002516	0.8243	0.468693	-0.771931	-0.148619	hsa_circRNA_102188
ASCRP000813	0.8243	0.468722	-0.771877	-0.3362	hsa_circRNA_100430
ASCRP002065	0.8243	0.468897	0.771561	0.563563	hsa_circRNA_101718
ASCRP003077	0.8243	0.469186	0.771036	0.776667	hsa_circRNA_102766
ASCRP002388	0.8243	0.469396	-0.770654	-0.180239	hsa_circRNA_102053
ASCRP000758	0.8243	0.469447	0.770562	0.671134	hsa_circRNA_100373
ASCRP000745	0.8243	0.469494	0.770477	0.193054	hsa_circRNA_100360
ASCRP001422	0.8243	0.469536	-0.770402	-0.224277	hsa_circRNA_101054
ASCRP003476	0.8259	0.471223	-0.767346	-0.304894	hsa_circRNA_103177
ASCRP004679	0.8259	0.471638	-0.766594	-0.173325	hsa_circRNA_104423
ASCRP003429	0.8259	0.471925	-0.766076	-0.211314	hsa_circRNA_103125
ASCRP000639	0.8259	0.471988	-0.765962	-0.36949	hsa_circRNA_100251
ASCRP003567	0.8259	0.472799	0.764497	0.77538	hsa_circRNA_103269
ASCRP001264	0.8259	0.472991	-0.764151	-0.444854	hsa_circRNA_100891
ASCRP004848	0.8259	0.473005	0.764125	0.888462	hsa_circRNA_104595
ASCRP003859	0.8259	0.473216	0.763744	0.728046	hsa_circRNA_103561
ASCRP000548	0.8259	0.473597	-0.763057	-0.267057	hsa_circRNA_100159
ASCRP001048	0.8259	0.473661	-0.762942	-0.198362	hsa_circRNA_100674
ASCRP002563	0.8264	0.474271	-0.761842	-0.148598	hsa_circRNA_102235
ASCRP004063	0.8264	0.474609	-0.761234	-0.250086	hsa_circRNA_103773
ASCRP000760	0.8265	0.475218	0.760137	0.607518	hsa_circRNA_100375
ASCRP002384	0.8265	0.475366	0.759871	0.360158	hsa_circRNA_102049
ASCRP003766	0.8265	0.475682	0.759303	0.478285	hsa_circRNA_103468
ASCRP002533	0.8265	0.475922	0.758872	0.765917	hsa_circRNA_102205
ASCRP000964	0.8273	0.476936	0.757051	0.613411	hsa_circRNA_100587
ASCRP004966	0.8273	0.477055	-0.756838	-0.204936	hsa_circRNA_104715
ASCRP000010	0.8276	0.477669	0.755737	0.334237	hsa_circRNA_000094
ASCRP003409	0.8276	0.477921	-0.755286	-0.137996	hsa_circRNA_103105
ASCRP004522	0.8276	0.478331	0.75455	0.660164	hsa_circRNA_104251
ASCRP002161	0.8276	0.478505	-0.754239	-0.188701	hsa_circRNA_101816
ASCRP005367	0.8282	0.479154	-0.753078	-0.192297	hsa_circRNA_400073
ASCRP000294	0.8289	0.479932	-0.751687	-0.319156	hsa_circRNA_001547
ASCRP000976	0.8289	0.480208	-0.751194	-0.297994	hsa_circRNA_100601
ASCRP000470	0.8289	0.480677	0.750357	0.283119	hsa_circRNA_100080
ASCRP003212	0.8289	0.481005	-0.749772	-0.170121	hsa_circRNA_102904
ASCRP004493	0.8289	0.481226	-0.749377	-0.15998	hsa_circRNA_104221
ASCRP000788	0.8303	0.482336	0.7474	0.702672	hsa_circRNA_100404
ASCRP002520	0.8304	0.482724	0.746709	0.287103	hsa_circRNA_102192
ASCRP001578	0.8305	0.483206	-0.745851	-0.352593	hsa_circRNA_101215
ASCRP003661	0.8305	0.483458	-0.745403	-0.14955	hsa_circRNA_103363
ASCRP003779	0.831	0.484064	-0.744326	-0.183239	hsa_circRNA_103481
ASCRP005043	0.8325	0.485244	-0.742233	-0.159629	hsa_circRNA_104794
ASCRP004668	0.833	0.486135	-0.740654	-0.192919	hsa_circRNA_104412
ASCRP003418	0.833	0.486413	-0.740162	-0.205173	hsa_circRNA_103114
ASCRP002619	0.833	0.486523	0.739967	0.324823	hsa_circRNA_102300
ASCRP002998	0.833	0.487178	0.738808	0.335058	hsa_circRNA_102686
ASCRP003498	0.833	0.488302	-0.736823	-0.20813	hsa_circRNA_103200
ASCRP003178	0.833	0.488375	-0.736694	-0.151151	hsa_circRNA_102870
ASCRP004803	0.833	0.488638	-0.736229	-0.151248	hsa_circRNA_104549
ASCRP000444	0.833	0.488756	0.736021	0.205985	hsa_circRNA_100054
ASCRP003691	0.833	0.489181	0.735271	0.205576	hsa_circRNA_103393
ASCRP002094	0.833	0.489372	0.734934	0.321962	hsa_circRNA_101748
ASCRP001936	0.833	0.48943	-0.734831	-0.273861	hsa_circRNA_101586
ASCRP003630	0.833	0.489711	0.734337	0.296392	hsa_circRNA_103332
ASCRP003780	0.833	0.489921	0.733967	0.15254	hsa_circRNA_103482
ASCRP000889	0.833	0.490658	0.73267	0.721835	hsa_circRNA_100507
ASCRP001952	0.833	0.491425	0.731319	0.301635	hsa_circRNA_101603
ASCRP003556	0.833	0.491594	-0.731023	-0.160076	hsa_circRNA_103258
ASCRP002426	0.833	0.491724	0.730794	0.465293	hsa_circRNA_102091
ASCRP000572	0.833	0.491828	-0.730611	-0.238433	hsa_circRNA_100183
ASCRP004198	0.833	0.491848	0.730577	0.276439	hsa_circRNA_103918
ASCRP005010	0.833	0.492055	0.730213	1.0403	hsa_circRNA_104760
ASCRP002679	0.8337	0.493073	-0.728426	-0.144451	hsa_circRNA_102360
ASCRP000890	0.8337	0.493408	0.727839	0.685148	hsa_circRNA_100508
ASCRP001502	0.8337	0.493578	-0.72754	-0.222615	hsa_circRNA_101136
ASCRP000064	0.8337	0.493951	0.726887	0.586589	hsa_circRNA_000554
ASCRP001726	0.8337	0.49411	0.726608	0.680723	hsa_circRNA_101367
ASCRP000089	0.8351	0.495486	-0.7242	-0.432786	hsa_circRNA_000645
ASCRP000910	0.8351	0.495566	-0.72406	-0.208171	hsa_circRNA_100529
ASCRP003189	0.8369	0.496985	0.721583	0.129732	hsa_circRNA_102881
ASCRP000210	0.8382	0.49827	0.719342	0.310731	hsa_circRNA_001143
ASCRP001871	0.8382	0.498393	-0.719128	-0.225599	hsa_circRNA_101520
ASCRP001247	0.8418	0.50164	-0.713486	-0.268163	hsa_circRNA_100874
ASCRP003332	0.8418	0.501855	-0.713114	-0.141407	hsa_circRNA_103026
ASCRP000004	0.8418	0.501922	-0.712997	-0.238317	hsa_circRNA_000031
ASCRP003013	0.8418	0.502561	0.71189	0.30439	hsa_circRNA_102701
ASCRP005390	0.8418	0.502733	-0.711592	-0.316328	hsa_circRNA_400097
ASCRP001713	0.8418	0.503117	0.710927	0.459937	hsa_circRNA_101354
ASCRP002944	0.8418	0.503544	0.710189	0.169486	hsa_circRNA_102631
ASCRP002365	0.8418	0.503713	-0.709896	-0.210835	hsa_circRNA_102030
ASCRP004021	0.8418	0.503715	0.709893	0.208814	hsa_circRNA_103730
ASCRP002316	0.8418	0.504373	0.708755	0.661248	hsa_circRNA_101976
ASCRP001982	0.8418	0.504625	-0.70832	-0.162106	hsa_circRNA_101633
ASCRP000942	0.8418	0.505005	0.707664	0.602511	hsa_circRNA_100562
ASCRP003380	0.8418	0.505094	0.70751	1.13148	hsa_circRNA_103076
ASCRP003198	0.8418	0.505255	0.707232	0.556701	hsa_circRNA_102890
ASCRP000988	0.8418	0.505504	-0.706803	-0.164264	hsa_circRNA_100613
ASCRP002620	0.8426	0.506562	0.704979	0.46174	hsa_circRNA_102301
ASCRP001195	0.8426	0.507432	-0.703482	-0.248589	hsa_circRNA_100821
ASCRP004360	0.8426	0.507856	0.702752	0.824079	hsa_circRNA_104086
ASCRP004725	0.8426	0.508294	0.701998	0.591327	hsa_circRNA_104471
ASCRP001292	0.8426	0.508328	-0.70194	-0.325485	hsa_circRNA_100919
ASCRP005336	0.8426	0.508444	0.70174	0.67227	hsa_circRNA_400040
ASCRP000429	0.8426	0.508644	-0.701397	-0.378579	hsa_circRNA_100039
ASCRP003615	0.8426	0.50895	-0.700872	-0.440591	hsa_circRNA_103317
ASCRP002062	0.8426	0.509267	0.700327	0.404315	hsa_circRNA_101715
ASCRP000810	0.8426	0.509274	-0.700316	-0.143922	hsa_circRNA_100427
ASCRP001778	0.8428	0.509725	0.699542	0.59494	hsa_circRNA_101419
ASCRP000184	0.8436	0.510527	0.698166	0.779412	hsa_circRNA_001046
ASCRP004235	0.8446	0.511531	0.696446	0.287466	hsa_circRNA_103955
ASCRP001204	0.8446	0.51245	-0.694875	-0.133237	hsa_circRNA_100830
ASCRP001279	0.8446	0.512485	-0.694814	-0.317964	hsa_circRNA_100906
ASCRP004513	0.8446	0.512569	-0.694671	-0.231849	hsa_circRNA_104242
ASCRP003771	0.8446	0.512756	0.694352	0.214334	hsa_circRNA_103473
ASCRP001586	0.8453	0.513923	0.692359	0.523448	hsa_circRNA_101223
ASCRP001014	0.8453	0.514437	0.691481	0.353658	hsa_circRNA_100640
ASCRP000567	0.8453	0.514729	0.690985	0.234495	hsa_circRNA_100178
ASCRP000341	0.8453	0.514916	-0.690666	-0.416628	hsa_circRNA_001838
ASCRP001155	0.8453	0.515159	0.690251	0.239454	hsa_circRNA_100781
ASCRP001477	0.8453	0.515515	-0.689645	-0.174464	hsa_circRNA_101110
ASCRP002261	0.8453	0.515533	-0.689614	-0.204891	hsa_circRNA_101919
ASCRP005132	0.8453	0.515849	-0.689077	-0.217646	hsa_circRNA_104885
ASCRP001373	0.847	0.517232	0.686724	0.339948	hsa_circRNA_101002
ASCRP003081	0.8479	0.518431	0.684688	0.253992	hsa_circRNA_102770
ASCRP003696	0.8479	0.518473	-0.684616	-0.197021	hsa_circRNA_103398
ASCRP003928	0.8479	0.518996	0.68373	0.263778	hsa_circRNA_103633
ASCRP003891	0.8479	0.519294	-0.683224	-0.134298	hsa_circRNA_103596
ASCRP001384	0.8479	0.519509	-0.68286	-0.238602	hsa_circRNA_101014
ASCRP004185	0.8479	0.519719	0.682505	0.422987	hsa_circRNA_103905
ASCRP003441	0.8484	0.520371	-0.6814	-0.158033	hsa_circRNA_103138
ASCRP002639	0.8486	0.52084	-0.680607	-0.21791	hsa_circRNA_102320
ASCRP003227	0.8492	0.521522	0.679454	0.249211	hsa_circRNA_102919
ASCRP002678	0.8497	0.522568	0.677687	0.92938	hsa_circRNA_102359
ASCRP000411	0.8497	0.523236	0.67656	0.639312	hsa_circRNA_100021
ASCRP002609	0.8497	0.523364	-0.676344	-0.303153	hsa_circRNA_102290
ASCRP001229	0.8497	0.523369	-0.676335	-0.279828	hsa_circRNA_100855
ASCRP003105	0.8497	0.523508	0.676101	0.547585	hsa_circRNA_102796
ASCRP000024	0.8504	0.524281	0.674798	0.192804	hsa_circRNA_000212
ASCRP003677	0.8505	0.524689	-0.67411	-0.218237	hsa_circRNA_103379
ASCRP003973	0.8514	0.525582	-0.672609	-0.20581	hsa_circRNA_103679
ASCRP003147	0.8517	0.526337	-0.671339	-0.298455	hsa_circRNA_102839
ASCRP003243	0.8517	0.527241	-0.669822	-0.148597	hsa_circRNA_102936
ASCRP001537	0.8517	0.52739	-0.669571	-0.209609	hsa_circRNA_101174
ASCRP004547	0.8517	0.527521	-0.669352	-0.168773	hsa_circRNA_104282
ASCRP000946	0.8517	0.52801	-0.668531	-0.22262	hsa_circRNA_100566
ASCRP003650	0.8517	0.528037	-0.668486	-0.257286	hsa_circRNA_103352
ASCRP001164	0.8517	0.528558	0.667612	0.416341	hsa_circRNA_100790
ASCRP000167	0.8517	0.528959	-0.666941	-0.219251	hsa_circRNA_000963
ASCRP004854	0.8517	0.529505	-0.666026	-0.136587	hsa_circRNA_104601
ASCRP001285	0.8517	0.529834	-0.665477	-0.256858	hsa_circRNA_100912
ASCRP003999	0.8517	0.530026	0.665156	0.227944	hsa_circRNA_103705
ASCRP004689	0.8517	0.530316	-0.66467	-0.212233	hsa_circRNA_104433
ASCRP001705	0.8517	0.530502	-0.66436	-0.289584	hsa_circRNA_101346
ASCRP002373	0.8517	0.530764	-0.663921	-0.282149	hsa_circRNA_102038
ASCRP004584	0.8517	0.530829	0.663813	0.261646	hsa_circRNA_104321
ASCRP004094	0.8517	0.531043	-0.663455	-0.326256	hsa_circRNA_103804
ASCRP001086	0.853	0.532182	-0.661553	-0.208422	hsa_circRNA_100712
ASCRP002508	0.853	0.532667	0.660744	0.261215	hsa_circRNA_102179
ASCRP004170	0.853	0.532972	0.660236	0.649794	hsa_circRNA_103890
ASCRP001113	0.853	0.533235	0.659797	0.188535	hsa_circRNA_100739
ASCRP005324	0.8536	0.533936	-0.658631	-0.172996	hsa_circRNA_400028
ASCRP003899	0.8543	0.535009	0.656845	0.381375	hsa_circRNA_103604
ASCRP000558	0.8543	0.535201	0.656525	0.141182	hsa_circRNA_100169
ASCRP004851	0.8543	0.535406	0.656184	0.723918	hsa_circRNA_104598
ASCRP004211	0.8543	0.535761	-0.655595	-0.118428	hsa_circRNA_103931
ASCRP005171	0.8543	0.536439	0.654469	0.68311	hsa_circRNA_104924
ASCRP000803	0.8543	0.536673	0.65408	0.724284	hsa_circRNA_100420
ASCRP002937	0.8543	0.536982	0.653568	0.396436	hsa_circRNA_102624
ASCRP000614	0.8543	0.537005	0.653529	0.220589	hsa_circRNA_100226
ASCRP003017	0.8558	0.538303	-0.651379	-0.226005	hsa_circRNA_102705
ASCRP001277	0.8558	0.53865	0.650803	1.08399	hsa_circRNA_100904
ASCRP000224	0.8576	0.540515	-0.647719	-0.142004	hsa_circRNA_001200
ASCRP003977	0.8576	0.540698	0.647417	0.443357	hsa_circRNA_103683
ASCRP001594	0.8576	0.540881	0.647115	0.257445	hsa_circRNA_101231
ASCRP005301	0.8576	0.541086	0.646777	0.360606	hsa_circRNA_400005
ASCRP002802	0.8581	0.54175	0.64568	0.715184	hsa_circRNA_102485
ASCRP001223	0.8613	0.544165	-0.641702	-0.262752	hsa_circRNA_100849
ASCRP004760	0.8613	0.54449	0.641168	0.646423	hsa_circRNA_104506
ASCRP002444	0.8613	0.544936	0.640435	0.200818	hsa_circRNA_102111
ASCRP003463	0.8613	0.545158	-0.640069	-0.271876	hsa_circRNA_103162
ASCRP000254	0.8639	0.547137	0.636822	0.132398	hsa_circRNA_001355
ASCRP000755	0.8642	0.548058	-0.635312	-0.181199	hsa_circRNA_100370
ASCRP002632	0.8642	0.548334	-0.63486	-0.174466	hsa_circRNA_102313
ASCRP001458	0.8642	0.548744	-0.634188	-0.296148	hsa_circRNA_101090
ASCRP000998	0.8642	0.549188	-0.633463	-0.220173	hsa_circRNA_100624
ASCRP000547	0.8642	0.549318	-0.633249	-0.209667	hsa_circRNA_100158
ASCRP002846	0.8642	0.549595	0.632797	0.616579	hsa_circRNA_102533
ASCRP004573	0.8642	0.549891	-0.632313	-0.220111	hsa_circRNA_104309
ASCRP001610	0.8642	0.549978	-0.632171	-0.329234	hsa_circRNA_101247
ASCRP005359	0.8654	0.551619	-0.629492	-0.149596	hsa_circRNA_400065
ASCRP001892	0.8654	0.551709	-0.629345	-0.28837	hsa_circRNA_101541
ASCRP003776	0.8654	0.55277	0.627615	0.447351	hsa_circRNA_103478
ASCRP002662	0.8654	0.552994	-0.627251	-0.367531	hsa_circRNA_102343
ASCRP000875	0.8654	0.553003	-0.627236	-0.239822	hsa_circRNA_100492
ASCRP004569	0.8654	0.553157	-0.626986	-0.158758	hsa_circRNA_104305
ASCRP004381	0.8654	0.553931	-0.625725	-0.214258	hsa_circRNA_104108
ASCRP003052	0.8654	0.55443	-0.624913	-0.342779	hsa_circRNA_102740
ASCRP004285	0.8654	0.554611	-0.62462	-0.283009	hsa_circRNA_104005
ASCRP004838	0.8654	0.554683	-0.624502	-0.155068	hsa_circRNA_104585
ASCRP001577	0.8654	0.555208	0.623649	0.149339	hsa_circRNA_101214
ASCRP000022	0.8654	0.555486	-0.623198	-0.376086	hsa_circRNA_000200
ASCRP002095	0.8654	0.555541	-0.623109	-0.395032	hsa_circRNA_101749
ASCRP002565	0.8654	0.555711	0.622833	0.503028	hsa_circRNA_102237
ASCRP002428	0.8654	0.555855	-0.622599	-0.168463	hsa_circRNA_102093
ASCRP004540	0.8654	0.556415	0.62169	0.360268	hsa_circRNA_104270
ASCRP000204	0.8654	0.556533	0.621498	0.710072	hsa_circRNA_001108
ASCRP002995	0.8665	0.557562	-0.61983	-0.157198	hsa_circRNA_102683
ASCRP004621	0.8671	0.558663	-0.618046	-0.258929	hsa_circRNA_104359
ASCRP002896	0.8671	0.559448	-0.616776	-0.174844	hsa_circRNA_102583
ASCRP002702	0.8671	0.559985	-0.615908	-0.235417	hsa_circRNA_102383
ASCRP004268	0.8671	0.560114	0.6157	0.76952	hsa_circRNA_103988
ASCRP003658	0.8671	0.560286	0.615422	0.205328	hsa_circRNA_103360
ASCRP000660	0.8671	0.560316	0.615374	0.434567	hsa_circRNA_100272
ASCRP001953	0.8671	0.560584	0.614941	0.269137	hsa_circRNA_101604
ASCRP002841	0.8671	0.560671	-0.6148	-0.276111	hsa_circRNA_102528
ASCRP003358	0.8674	0.561511	-0.613445	-0.273367	hsa_circRNA_103053
ASCRP002435	0.8674	0.561633	-0.613247	-0.26837	hsa_circRNA_102101
ASCRP005264	0.8674	0.561862	0.612879	0.217216	hsa_circRNA_105017
ASCRP002083	0.8679	0.562792	0.611378	0.269283	hsa_circRNA_101737
ASCRP001636	0.8679	0.562912	0.611186	0.772175	hsa_circRNA_101275
ASCRP004118	0.8691	0.563992	-0.609447	-0.274699	hsa_circRNA_103828
ASCRP003632	0.8704	0.565236	0.607446	0.232717	hsa_circRNA_103334
ASCRP005270	0.8704	0.565498	0.607025	0.279286	hsa_circRNA_105023
ASCRP001112	0.8704	0.56586	0.606443	0.284119	hsa_circRNA_100738
ASCRP001991	0.8708	0.566695	-0.605103	-0.278536	hsa_circRNA_101642
ASCRP004219	0.8708	0.566812	0.604916	0.535336	hsa_circRNA_103939
ASCRP003683	0.8708	0.567486	-0.603835	-0.289707	hsa_circRNA_103385
ASCRP003640	0.8708	0.567516	0.603786	0.159916	hsa_circRNA_103342
ASCRP005002	0.8729	0.569388	-0.600787	-0.45195	hsa_circRNA_104752
ASCRP001940	0.8729	0.569892	0.599982	0.32897	hsa_circRNA_101590
ASCRP000275	0.8729	0.569998	-0.599812	-0.205148	hsa_circRNA_001430
ASCRP000906	0.8729	0.570235	0.599433	0.392729	hsa_circRNA_100525
ASCRP003295	0.8736	0.571132	-0.598	-0.223673	hsa_circRNA_102988
ASCRP002102	0.8736	0.571346	0.597659	0.556719	hsa_circRNA_101756
ASCRP001928	0.8736	0.571934	0.596721	0.178901	hsa_circRNA_101578
ASCRP000201	0.8736	0.572066	0.59651	0.375377	hsa_circRNA_001100
ASCRP004878	0.874	0.572655	-0.59557	-0.549865	hsa_circRNA_104625
ASCRP001926	0.8744	0.573495	-0.594232	-0.280467	hsa_circRNA_101575
ASCRP002864	0.8744	0.57372	-0.593872	-0.150568	hsa_circRNA_102551
ASCRP001842	0.8744	0.574197	-0.593113	-0.577249	hsa_circRNA_101491
ASCRP000513	0.8744	0.574249	-0.593031	-0.14322	hsa_circRNA_100123
ASCRP000575	0.8747	0.574848	-0.592077	-0.26326	hsa_circRNA_100186
ASCRP001620	0.8747	0.575725	0.590682	0.34102	hsa_circRNA_101258
ASCRP000921	0.8747	0.576162	0.589988	0.355543	hsa_circRNA_100541
ASCRP004190	0.8747	0.576355	0.589682	0.438072	hsa_circRNA_103910
ASCRP000465	0.8747	0.576596	-0.589298	-0.282704	hsa_circRNA_100075
ASCRP000496	0.8747	0.577052	-0.588575	-0.244389	hsa_circRNA_100106
ASCRP004115	0.8747	0.577969	0.58712	0.19223	hsa_circRNA_103825
ASCRP005223	0.8747	0.578329	-0.586549	-0.192671	hsa_circRNA_104976
ASCRP004263	0.8747	0.578703	0.585957	0.163067	hsa_circRNA_103983
ASCRP002285	0.8747	0.578707	-0.58595	-0.198141	hsa_circRNA_101944
ASCRP004307	0.8747	0.578905	-0.585637	-0.199933	hsa_circRNA_104032
ASCRP002025	0.8747	0.579162	0.58523	0.32818	hsa_circRNA_101678
ASCRP001908	0.8747	0.579263	-0.58507	-0.126328	hsa_circRNA_101557
ASCRP004287	0.8747	0.579267	-0.585064	-0.211653	hsa_circRNA_104007
ASCRP005341	0.8749	0.580789	-0.582656	-0.207455	hsa_circRNA_400045
ASCRP002030	0.8749	0.580832	-0.582587	-0.150747	hsa_circRNA_101683
ASCRP003895	0.8749	0.581435	-0.581634	-0.236983	hsa_circRNA_103600
ASCRP000646	0.8749	0.581625	0.581334	0.228278	hsa_circRNA_100258
ASCRP000692	0.8749	0.582162	0.580486	0.159868	hsa_circRNA_100305
ASCRP002208	0.8749	0.582569	-0.579842	-0.10993	hsa_circRNA_101865
ASCRP002036	0.8749	0.582663	0.579694	0.184797	hsa_circRNA_101689
ASCRP003714	0.8749	0.582846	-0.579406	-0.155403	hsa_circRNA_103416
ASCRP002671	0.8749	0.582936	-0.579263	-0.190735	hsa_circRNA_102352
ASCRP004039	0.8749	0.583306	0.57868	0.383972	hsa_circRNA_103748
ASCRP001115	0.8749	0.584105	-0.57742	-0.133919	hsa_circRNA_100741
ASCRP000641	0.8749	0.584127	0.577385	0.207132	hsa_circRNA_100253
ASCRP004594	0.8749	0.58413	-0.577382	-0.123659	hsa_circRNA_104331
ASCRP001322	0.8749	0.584194	-0.577281	-0.184914	hsa_circRNA_100950
ASCRP003514	0.8753	0.584814	0.576304	0.212431	hsa_circRNA_103216
ASCRP004016	0.8757	0.585365	-0.575436	-0.149251	hsa_circRNA_103725
ASCRP000418	0.8758	0.586546	0.573578	0.329517	hsa_circRNA_100028
ASCRP000643	0.8758	0.587377	-0.572272	-0.188202	hsa_circRNA_100255
ASCRP001945	0.8758	0.587841	0.571543	0.38084	hsa_circRNA_101595
ASCRP005222	0.8758	0.587967	-0.571347	-0.149104	hsa_circRNA_104975
ASCRP004182	0.8758	0.588168	-0.57103	-0.161158	hsa_circRNA_103902
ASCRP005296	0.8758	0.588244	0.57091	0.392568	hsa_circRNA_105052
ASCRP002499	0.8758	0.588416	-0.570642	-0.186596	hsa_circRNA_102167
ASCRP002460	0.8758	0.588471	-0.570554	-0.156659	hsa_circRNA_102128
ASCRP002893	0.8758	0.588537	0.570451	0.300869	hsa_circRNA_102580
ASCRP005019	0.8791	0.591128	0.566391	0.374414	hsa_circRNA_104769
ASCRP001802	0.8796	0.592701	-0.563931	-0.129423	hsa_circRNA_101445
ASCRP000709	0.8796	0.592786	-0.563798	-0.1454	hsa_circRNA_100323
ASCRP002649	0.8796	0.593196	-0.563158	-0.148138	hsa_circRNA_102330
ASCRP000338	0.8796	0.593571	-0.562573	-0.186058	hsa_circRNA_001820
ASCRP001108	0.8796	0.593855	0.56213	0.467206	hsa_circRNA_100734
ASCRP005101	0.8796	0.594052	-0.561822	-0.196128	hsa_circRNA_104854
ASCRP000519	0.8796	0.594203	-0.561587	-0.179857	hsa_circRNA_100129
ASCRP000335	0.8796	0.594209	0.561577	0.281617	hsa_circRNA_001808
ASCRP001015	0.8798	0.594692	0.560824	0.373075	hsa_circRNA_100641
ASCRP003204	0.8808	0.595691	-0.559267	-0.154215	hsa_circRNA_102896
ASCRP003553	0.8812	0.596317	-0.558291	-0.174623	hsa_circRNA_103255
ASCRP002422	0.8812	0.596623	0.557814	0.162023	hsa_circRNA_102087
ASCRP003187	0.8812	0.597023	0.557192	0.383005	hsa_circRNA_102879
ASCRP004541	0.883	0.598562	-0.554798	-0.164467	hsa_circRNA_104271
ASCRP004563	0.883	0.599301	0.553652	0.135124	hsa_circRNA_104299
ASCRP000002	0.883	0.599759	0.552941	0.346443	hsa_circRNA_000010
ASCRP001806	0.883	0.599868	-0.552772	-0.12437	hsa_circRNA_101450
ASCRP004572	0.883	0.600047	0.552493	0.843514	hsa_circRNA_104308
ASCRP002664	0.883	0.600287	-0.552122	-0.378141	hsa_circRNA_102345
ASCRP003236	0.8832	0.600818	-0.551298	-0.258191	hsa_circRNA_102929
ASCRP002999	0.8832	0.601791	0.54979	0.212137	hsa_circRNA_102687
ASCRP001730	0.8832	0.601806	0.549766	0.211857	hsa_circRNA_101371
ASCRP002654	0.8832	0.601811	0.549759	0.200003	hsa_circRNA_102335
ASCRP001777	0.8834	0.602547	0.548619	0.22504	hsa_circRNA_101418
ASCRP004075	0.8834	0.602605	-0.548528	-0.111883	hsa_circRNA_103785
ASCRP000266	0.8838	0.603223	-0.547573	-0.229577	hsa_circRNA_001401
ASCRP004207	0.884	0.603726	-0.546795	-0.198478	hsa_circRNA_103927
ASCRP000081	0.8844	0.604358	-0.545818	-0.216751	hsa_circRNA_000621
ASCRP000617	0.8849	0.605152	-0.544591	-0.261003	hsa_circRNA_100229
ASCRP004697	0.8849	0.605691	0.54376	0.160979	hsa_circRNA_104441
ASCRP003643	0.8849	0.606024	0.543245	0.301116	hsa_circRNA_103345
ASCRP005385	0.8849	0.606073	0.543169	0.373571	hsa_circRNA_400092
ASCRP000987	0.8851	0.606547	-0.54244	-0.14652	hsa_circRNA_100612
ASCRP002072	0.8858	0.608484	-0.539454	-0.275529	hsa_circRNA_101725
ASCRP000724	0.8858	0.609366	0.538098	0.300663	hsa_circRNA_100339
ASCRP000668	0.8858	0.609457	-0.537957	-0.211086	hsa_circRNA_100280
ASCRP000153	0.8858	0.609799	-0.537431	-0.22116	hsa_circRNA_000926
ASCRP003232	0.8858	0.609832	-0.537381	-0.195411	hsa_circRNA_102924
ASCRP005047	0.8858	0.6106	0.5362	0.306075	hsa_circRNA_104798
ASCRP001725	0.8858	0.610871	0.535783	0.124697	hsa_circRNA_101366
ASCRP002217	0.8858	0.611926	0.534164	0.202599	hsa_circRNA_101875
ASCRP004073	0.8858	0.612096	0.533903	0.473766	hsa_circRNA_103783
ASCRP004991	0.8858	0.6121	0.533898	0.362237	hsa_circRNA_104741
ASCRP004935	0.8858	0.612143	0.533832	0.15018	hsa_circRNA_104682
ASCRP002311	0.8858	0.613175	-0.532249	-0.379584	hsa_circRNA_101971
ASCRP005370	0.8858	0.613433	0.531853	0.280103	hsa_circRNA_400076
ASCRP005271	0.8858	0.613985	-0.531007	-0.32804	hsa_circRNA_105024
ASCRP004658	0.8858	0.614214	-0.530657	-0.213578	hsa_circRNA_104398
ASCRP005096	0.8858	0.614879	-0.529639	-0.148782	hsa_circRNA_104849
ASCRP001316	0.8858	0.614891	-0.52962	-0.187592	hsa_circRNA_100944
ASCRP000774	0.8858	0.615219	0.529119	0.402933	hsa_circRNA_100389
ASCRP000529	0.8858	0.61525	0.529071	0.317128	hsa_circRNA_100139
ASCRP001867	0.8858	0.61527	0.52904	0.131965	hsa_circRNA_101516
ASCRP001052	0.8858	0.615781	-0.52826	-0.118058	hsa_circRNA_100678
ASCRP004846	0.8858	0.61606	0.527832	0.176903	hsa_circRNA_104593
ASCRP002692	0.8858	0.61622	0.527588	0.109497	hsa_circRNA_102373
ASCRP000469	0.8858	0.616318	0.527438	0.30078	hsa_circRNA_100079
ASCRP001206	0.8858	0.616515	0.527137	0.208191	hsa_circRNA_100832
ASCRP000284	0.8858	0.616774	-0.52674	-0.183313	hsa_circRNA_001498
ASCRP002210	0.8858	0.61706	-0.526304	-0.276657	hsa_circRNA_101867
ASCRP000239	0.8858	0.617728	0.525285	0.57533	hsa_circRNA_001259
ASCRP003074	0.8858	0.617773	0.525216	0.515907	hsa_circRNA_102763
ASCRP000157	0.8858	0.617907	-0.52501	-0.19362	hsa_circRNA_000941
ASCRP005364	0.8858	0.618107	0.524705	0.451012	hsa_circRNA_400070
ASCRP003113	0.8858	0.618879	0.523528	0.218349	hsa_circRNA_102804
ASCRP005003	0.8858	0.619416	-0.52271	-0.222433	hsa_circRNA_104753
ASCRP000075	0.8858	0.619453	-0.522652	-0.215301	hsa_circRNA_000598
ASCRP002986	0.8858	0.619628	0.522387	0.217731	hsa_circRNA_102673
ASCRP002219	0.8858	0.620477	0.521092	0.415028	hsa_circRNA_101877
ASCRP004653	0.8858	0.620649	0.520831	0.321312	hsa_circRNA_104393
ASCRP000561	0.8858	0.620906	-0.520439	-0.147645	hsa_circRNA_100172
ASCRP000741	0.8858	0.620975	0.520334	0.232135	hsa_circRNA_100356
ASCRP001017	0.8858	0.620977	0.520331	0.165369	hsa_circRNA_100643
ASCRP004068	0.8858	0.621276	-0.519876	-0.211906	hsa_circRNA_103778
ASCRP001219	0.8858	0.621836	0.519024	0.56449	hsa_circRNA_100845
ASCRP001058	0.8858	0.621915	0.518905	0.44748	hsa_circRNA_100684
ASCRP002770	0.8865	0.622736	0.517656	0.267426	hsa_circRNA_102451
ASCRP002954	0.8882	0.624985	-0.514241	-0.192265	hsa_circRNA_102641
ASCRP003439	0.8882	0.625003	-0.514215	-0.128984	hsa_circRNA_103136
ASCRP005242	0.8882	0.625177	0.513951	0.184119	hsa_circRNA_104995
ASCRP000351	0.8882	0.625665	-0.513211	-0.341556	hsa_circRNA_001915
ASCRP001251	0.8882	0.625695	-0.513165	-0.264627	hsa_circRNA_100878
ASCRP003308	0.8891	0.626692	-0.511654	-0.238972	hsa_circRNA_103002
ASCRP005297	0.8891	0.627202	-0.510882	-0.143216	hsa_circRNA_105053
ASCRP001505	0.8891	0.627359	-0.510644	-0.486789	hsa_circRNA_101139
ASCRP004504	0.8898	0.628317	0.509195	0.279418	hsa_circRNA_104232
ASCRP002803	0.8898	0.62855	-0.508843	-0.129847	hsa_circRNA_102486
ASCRP004412	0.8906	0.629802	-0.50695	-0.252095	hsa_circRNA_104139
ASCRP002571	0.8906	0.630071	-0.506545	-0.247218	hsa_circRNA_102243
ASCRP003724	0.8906	0.630741	-0.505532	-0.179661	hsa_circRNA_103426
ASCRP002216	0.8906	0.630795	0.50545	0.255599	hsa_circRNA_101874
ASCRP002887	0.8906	0.630878	0.505325	0.411485	hsa_circRNA_102574
ASCRP000502	0.891	0.631498	-0.50439	-0.334719	hsa_circRNA_100112
ASCRP000421	0.8912	0.632105	-0.503475	-0.10595	hsa_circRNA_100031
ASCRP000620	0.8912	0.632449	-0.502957	-0.101661	hsa_circRNA_100232
ASCRP000016	0.8912	0.63273	-0.502533	-0.182425	hsa_circRNA_000162
ASCRP003708	0.8912	0.633431	0.501477	0.386495	hsa_circRNA_103410
ASCRP002192	0.8912	0.633524	-0.501337	-0.137216	hsa_circRNA_101849
ASCRP002699	0.8912	0.633737	-0.501015	-0.286778	hsa_circRNA_102380
ASCRP002349	0.8913	0.635041	0.499055	0.149772	hsa_circRNA_102013
ASCRP000493	0.8913	0.635086	0.498987	0.21982	hsa_circRNA_100103
ASCRP001336	0.8913	0.635452	-0.498436	-0.120542	hsa_circRNA_100964
ASCRP004423	0.8913	0.635879	0.497795	0.179034	hsa_circRNA_104150
ASCRP001203	0.8913	0.635913	-0.497744	-0.134927	hsa_circRNA_100829
ASCRP003259	0.8913	0.636153	-0.497383	-0.117277	hsa_circRNA_102952
ASCRP003210	0.8913	0.6363	-0.497161	-0.142719	hsa_circRNA_102902
ASCRP000459	0.8913	0.636614	-0.49669	-0.100282	hsa_circRNA_100069
ASCRP004979	0.8913	0.637583	-0.495236	-0.136466	hsa_circRNA_104729
ASCRP002746	0.8913	0.637642	-0.495147	-0.1011	hsa_circRNA_102427
ASCRP002227	0.8913	0.637839	0.494851	0.269066	hsa_circRNA_101885
ASCRP004048	0.8913	0.638002	-0.494607	-0.193205	hsa_circRNA_103757
ASCRP000650	0.8919	0.638868	0.493308	0.174206	hsa_circRNA_100262
ASCRP005124	0.8919	0.63912	0.49293	0.408158	hsa_circRNA_104877
ASCRP002894	0.8921	0.639641	-0.49215	-0.188807	hsa_circRNA_102581
ASCRP003182	0.8928	0.640711	-0.490548	-0.204862	hsa_circRNA_102874
ASCRP002230	0.8928	0.641295	-0.489674	-0.20671	hsa_circRNA_101888
ASCRP005395	0.8928	0.6413	0.489665	0.484599	hsa_circRNA_400102
ASCRP005256	0.8928	0.641701	0.489067	0.107055	hsa_circRNA_105009
ASCRP001755	0.8928	0.642267	0.48822	0.372883	hsa_circRNA_101396
ASCRP000019	0.8928	0.642287	-0.48819	-0.264228	hsa_circRNA_000178
ASCRP004363	0.8928	0.642877	-0.487308	-0.187235	hsa_circRNA_104090
ASCRP000094	0.8928	0.643357	0.48659	0.466498	hsa_circRNA_000671
ASCRP000268	0.8928	0.643751	-0.486002	-0.203469	hsa_circRNA_001408
ASCRP004993	0.8928	0.644167	0.485381	0.156564	hsa_circRNA_104743
ASCRP004896	0.8928	0.644366	0.485085	0.202325	hsa_circRNA_104643
ASCRP003158	0.8928	0.644591	0.484748	0.173925	hsa_circRNA_102850
ASCRP000093	0.8928	0.644872	0.484329	0.332366	hsa_circRNA_000662
ASCRP003136	0.8928	0.645001	-0.484138	-0.19846	hsa_circRNA_102827
ASCRP003862	0.8928	0.645416	-0.483519	-0.196733	hsa_circRNA_103564
ASCRP001934	0.8928	0.646509	0.481889	0.103326	hsa_circRNA_101584
ASCRP000738	0.8928	0.646606	0.481745	0.215146	hsa_circRNA_100353
ASCRP003897	0.8928	0.646638	0.481697	0.245289	hsa_circRNA_103602
ASCRP005344	0.8928	0.646704	0.481599	0.488928	hsa_circRNA_400048
ASCRP003792	0.8929	0.647139	-0.480951	-0.149372	hsa_circRNA_103494
ASCRP004526	0.8933	0.648319	-0.479196	-0.163624	hsa_circRNA_104255
ASCRP001646	0.8933	0.649002	-0.478179	-0.158806	hsa_circRNA_101286
ASCRP000035	0.8933	0.649654	0.47721	0.169784	hsa_circRNA_000329
ASCRP004894	0.8933	0.649778	-0.477025	-0.18194	hsa_circRNA_104641
ASCRP001183	0.8933	0.649974	0.476735	0.210297	hsa_circRNA_100809
ASCRP000085	0.8933	0.651131	-0.475016	-0.34375	hsa_circRNA_000629
ASCRP000391	0.8933	0.651175	0.474952	0.105326	hsa_circRNA_100001
ASCRP004091	0.8933	0.65137	0.474662	0.382263	hsa_circRNA_103801
ASCRP000194	0.8933	0.651616	0.474297	0.122881	hsa_circRNA_001073
ASCRP002443	0.8933	0.651649	-0.474248	-0.114673	hsa_circRNA_102110
ASCRP001695	0.8933	0.652101	0.473578	0.668288	hsa_circRNA_101336
ASCRP001693	0.8933	0.652253	0.473351	0.221974	hsa_circRNA_101334
ASCRP001510	0.8933	0.653468	-0.471551	-0.160376	hsa_circRNA_101144
ASCRP003078	0.8933	0.654018	0.470736	0.281611	hsa_circRNA_102767
ASCRP000322	0.8933	0.654143	-0.470551	-0.22552	hsa_circRNA_001724
ASCRP000804	0.8933	0.654744	0.469662	0.407438	hsa_circRNA_100421
ASCRP001179	0.8933	0.654851	0.469503	0.353469	hsa_circRNA_100805
ASCRP005076	0.8933	0.654904	0.469424	0.345238	hsa_circRNA_104828
ASCRP001410	0.8933	0.655303	0.468835	0.382268	hsa_circRNA_101040
ASCRP003484	0.8933	0.655515	-0.46852	-0.17235	hsa_circRNA_103186
ASCRP001116	0.8933	0.655538	-0.468486	-0.121294	hsa_circRNA_100742
ASCRP001729	0.8933	0.65571	-0.468232	-0.150739	hsa_circRNA_101370
ASCRP004407	0.8933	0.65604	0.467744	0.722909	hsa_circRNA_104134
ASCRP002811	0.8933	0.656104	0.46765	0.37088	hsa_circRNA_102494
ASCRP000253	0.8933	0.656457	-0.467128	-0.165127	hsa_circRNA_001350
ASCRP002088	0.8933	0.656553	-0.466985	-0.113544	hsa_circRNA_101742
ASCRP003225	0.8941	0.657492	-0.465598	-0.167912	hsa_circRNA_102917
ASCRP000212	0.8944	0.658002	-0.464845	-0.219739	hsa_circRNA_001153
ASCRP003367	0.8944	0.658376	0.464293	0.156445	hsa_circRNA_103062
ASCRP002700	0.8948	0.659066	0.463275	0.426237	hsa_circRNA_102381
ASCRP000566	0.8955	0.659897	-0.46205	-0.196049	hsa_circRNA_100177
ASCRP000435	0.8955	0.660234	0.461552	0.304201	hsa_circRNA_100045
ASCRP002760	0.8966	0.661499	-0.459689	-0.199304	hsa_circRNA_102441
ASCRP004390	0.8966	0.661986	0.458973	0.138257	hsa_circRNA_104117
ASCRP002069	0.8966	0.66212	-0.458776	-0.265556	hsa_circRNA_101722
ASCRP004449	0.8968	0.662621	0.458039	0.203239	hsa_circRNA_104176
ASCRP000226	0.8995	0.664929	-0.454645	-0.234767	hsa_circRNA_001205
ASCRP000833	0.8996	0.665394	-0.453964	-0.102268	hsa_circRNA_100450
ASCRP004221	0.8998	0.665861	-0.453278	-0.195177	hsa_circRNA_103941
ASCRP005194	0.9011	0.667214	0.451293	0.131673	hsa_circRNA_104947
ASCRP001709	0.9014	0.6682	0.449848	0.133557	hsa_circRNA_101350
ASCRP003890	0.9014	0.66827	-0.449745	-0.139511	hsa_circRNA_103595
ASCRP000370	0.9014	0.668856	0.448887	0.319165	hsa_circRNA_002039
ASCRP004711	0.9014	0.669447	-0.448022	-0.131341	hsa_circRNA_104457
ASCRP002537	0.9014	0.66948	-0.447974	-0.184723	hsa_circRNA_102209
ASCRP000719	0.9014	0.669525	0.447907	0.370551	hsa_circRNA_100334
ASCRP000794	0.9014	0.671275	-0.445348	-0.28617	hsa_circRNA_100411
ASCRP002134	0.9014	0.671283	-0.445336	-0.141571	hsa_circRNA_101788
ASCRP003324	0.9014	0.671543	0.444956	0.242998	hsa_circRNA_103018
ASCRP004797	0.9014	0.671675	0.444764	0.272318	hsa_circRNA_104543
ASCRP004033	0.9014	0.672155	-0.444063	-0.16777	hsa_circRNA_103742
ASCRP000171	0.9014	0.672294	-0.443859	-0.1233	hsa_circRNA_000990
ASCRP004996	0.9014	0.673166	-0.442586	-0.084973	hsa_circRNA_104746
ASCRP003385	0.9014	0.673221	-0.442505	-0.146392	hsa_circRNA_103081
ASCRP001886	0.9014	0.673433	-0.442196	-0.167604	hsa_circRNA_101535
ASCRP004217	0.9014	0.673463	0.442153	0.313013	hsa_circRNA_103937
ASCRP004681	0.9014	0.673484	-0.442123	-0.106312	hsa_circRNA_104425
ASCRP000029	0.9014	0.67373	0.441763	0.097657	hsa_circRNA_000294
ASCRP003076	0.902	0.674597	0.440498	0.336412	hsa_circRNA_102765
ASCRP005319	0.902	0.67491	-0.440042	-0.113735	hsa_circRNA_400023
ASCRP000265	0.9024	0.675589	0.439052	0.25383	hsa_circRNA_001396
ASCRP001192	0.9025	0.675993	-0.438464	-0.140239	hsa_circRNA_100818
ASCRP001662	0.9061	0.679079	-0.433974	-0.200915	hsa_circRNA_101303
ASCRP001679	0.9077	0.681185	0.430915	0.221075	hsa_circRNA_101320
ASCRP000799	0.9077	0.683246	0.427925	0.197105	hsa_circRNA_100416
ASCRP004310	0.9077	0.683288	0.427866	0.174213	hsa_circRNA_104035
ASCRP004367	0.9077	0.683404	0.427697	0.199053	hsa_circRNA_104094
ASCRP003538	0.9077	0.683542	-0.427497	-0.14738	hsa_circRNA_103240
ASCRP000480	0.9077	0.684029	0.426791	0.310805	hsa_circRNA_100090
ASCRP004165	0.9077	0.684194	-0.426552	-0.287535	hsa_circRNA_103885
ASCRP003361	0.9077	0.684343	-0.426337	-0.077301	hsa_circRNA_103056
ASCRP000245	0.9077	0.684796	0.42568	0.171929	hsa_circRNA_001296
ASCRP005396	0.9077	0.68545	0.424734	0.355036	hsa_circRNA_400103
ASCRP002860	0.9077	0.685579	-0.424547	-0.238631	hsa_circRNA_102547
ASCRP001105	0.9077	0.685912	0.424066	0.203523	hsa_circRNA_100731
ASCRP001426	0.9077	0.686125	0.423758	0.163581	hsa_circRNA_101058
ASCRP004743	0.9077	0.686175	-0.423685	-0.087628	hsa_circRNA_104489
ASCRP001818	0.9077	0.686545	-0.42315	-0.189288	hsa_circRNA_101467
ASCRP000626	0.9077	0.68677	-0.422825	-0.102615	hsa_circRNA_100238
ASCRP002943	0.9077	0.687898	0.421195	0.141463	hsa_circRNA_102630
ASCRP000460	0.9077	0.687989	-0.421063	-0.163331	hsa_circRNA_100070
ASCRP004408	0.9077	0.688044	-0.420984	-0.257695	hsa_circRNA_104135
ASCRP002492	0.9077	0.689431	-0.418982	-0.179161	hsa_circRNA_102160
ASCRP003133	0.9077	0.689681	-0.418621	-0.192611	hsa_circRNA_102824
ASCRP000775	0.9077	0.689848	-0.418381	-0.10906	hsa_circRNA_100390
ASCRP003637	0.9077	0.689879	-0.418336	-0.104173	hsa_circRNA_103339
ASCRP002160	0.9077	0.689973	0.418199	0.12819	hsa_circRNA_101815
ASCRP005369	0.9077	0.690284	-0.417751	-0.17297	hsa_circRNA_400075
ASCRP001049	0.9077	0.690396	-0.417589	-0.200232	hsa_circRNA_100675
ASCRP002019	0.9077	0.6906	0.417295	0.132025	hsa_circRNA_101672
ASCRP001059	0.9077	0.69063	0.417252	0.313142	hsa_circRNA_100685
ASCRP000573	0.9077	0.691525	-0.415962	-0.149337	hsa_circRNA_100184
ASCRP002486	0.9077	0.691574	-0.415891	-0.112567	hsa_circRNA_102154
ASCRP003964	0.9077	0.692433	0.414654	0.124554	hsa_circRNA_103670
ASCRP002914	0.9077	0.692513	0.414539	0.172489	hsa_circRNA_102601
ASCRP002068	0.9077	0.692901	-0.41398	-0.291554	hsa_circRNA_101721
ASCRP002858	0.9077	0.692912	-0.413964	-0.115154	hsa_circRNA_102545
ASCRP003235	0.9077	0.69295	-0.41391	-0.127133	hsa_circRNA_102928
ASCRP002834	0.9077	0.69303	0.413795	0.21904	hsa_circRNA_102520
ASCRP001201	0.908	0.693613	-0.412955	-0.165307	hsa_circRNA_100827
ASCRP002771	0.9082	0.694143	-0.412193	-0.107989	hsa_circRNA_102452
ASCRP001197	0.9082	0.694466	0.411729	0.097743	hsa_circRNA_100823
ASCRP001021	0.9082	0.694841	-0.41119	-0.146813	hsa_circRNA_100647
ASCRP003370	0.9085	0.695439	-0.410329	-0.151252	hsa_circRNA_103066
ASCRP001893	0.9089	0.696103	0.409376	0.214313	hsa_circRNA_101542
ASCRP000401	0.9095	0.697054	-0.40801	-0.140965	hsa_circRNA_100011
ASCRP000892	0.9095	0.697252	0.407726	0.246193	hsa_circRNA_100510
ASCRP003297	0.9095	0.697854	0.406862	0.102992	hsa_circRNA_102990
ASCRP004421	0.9095	0.697919	0.406769	0.244248	hsa_circRNA_104148
ASCRP003424	0.9098	0.69854	-0.405877	-0.076539	hsa_circRNA_103120
ASCRP000958	0.9108	0.700062	-0.403696	-0.122986	hsa_circRNA_100579
ASCRP001688	0.9108	0.700899	-0.402497	-0.148108	hsa_circRNA_101329
ASCRP003685	0.9108	0.7009	0.402496	0.409909	hsa_circRNA_103387
ASCRP003981	0.9108	0.701296	0.401929	0.226208	hsa_circRNA_103687
ASCRP001628	0.9108	0.701343	0.401861	0.178187	hsa_circRNA_101267
ASCRP003739	0.9108	0.701411	-0.401764	-0.120327	hsa_circRNA_103441
ASCRP003660	0.9109	0.70224	-0.400577	-0.148071	hsa_circRNA_103362
ASCRP000929	0.9109	0.702359	0.400407	0.202949	hsa_circRNA_100549
ASCRP000181	0.9109	0.702585	-0.400083	-0.115549	hsa_circRNA_001039
ASCRP003261	0.911	0.703097	0.399351	0.326749	hsa_circRNA_102954
ASCRP002538	0.911	0.703549	-0.398705	-0.116028	hsa_circRNA_102210
ASCRP003860	0.911	0.703766	-0.398395	-0.227743	hsa_circRNA_103562
ASCRP003583	0.9113	0.704368	0.397535	0.408696	hsa_circRNA_103285
ASCRP000367	0.9113	0.704646	0.397138	0.189109	hsa_circRNA_002010
ASCRP003472	0.9113	0.705376	0.396095	0.169954	hsa_circRNA_103171
ASCRP002469	0.9113	0.705449	-0.395991	-0.120497	hsa_circRNA_102137
ASCRP003689	0.9113	0.705743	-0.395571	-0.13108	hsa_circRNA_103391
ASCRP003970	0.9132	0.707538	-0.39301	-0.226379	hsa_circRNA_103676
ASCRP004283	0.9144	0.708955	-0.390991	-0.394818	hsa_circRNA_104003
ASCRP003571	0.9144	0.709435	0.390307	0.268955	hsa_circRNA_103273
ASCRP002329	0.9144	0.709811	-0.389771	-0.11435	hsa_circRNA_101992
ASCRP001618	0.9144	0.709965	0.389552	0.292021	hsa_circRNA_101255
ASCRP005009	0.9148	0.710848	0.388295	0.54023	hsa_circRNA_104759
ASCRP003627	0.9148	0.710947	0.388154	0.197751	hsa_circRNA_103329
ASCRP003839	0.9153	0.711941	0.386741	0.570432	hsa_circRNA_103541
ASCRP000776	0.9153	0.71206	0.386572	0.396616	hsa_circRNA_100391
ASCRP000859	0.9156	0.712632	-0.385758	-0.180115	hsa_circRNA_100476
ASCRP004537	0.9175	0.714645	0.382899	0.125882	hsa_circRNA_104267
ASCRP002293	0.9175	0.714837	0.382626	0.275044	hsa_circRNA_101952
ASCRP005244	0.9177	0.715377	-0.38186	-0.117862	hsa_circRNA_104997
ASCRP002434	0.9188	0.7166	0.380125	0.112008	hsa_circRNA_102100
ASCRP001728	0.9198	0.717712	0.378549	0.199443	hsa_circRNA_101369
ASCRP002446	0.9222	0.719986	0.37533	0.43677	hsa_circRNA_102113
ASCRP001547	0.9231	0.721457	0.37325	0.100101	hsa_circRNA_101184
[truncated: 560 more rows]

## Sheet: Table S2.3
	Table S2.3 A total of 2434 circRNAs shared between our datasets and GSE89143
Number	Name
1	hsa_circRNA_101637
2	hsa_circRNA_103442
3	hsa_circRNA_101592
4	hsa_circRNA_103205
5	hsa_circRNA_102742
6	hsa_circRNA_102476
7	hsa_circRNA_103809
8	hsa_circRNA_001826
9	hsa_circRNA_102745
10	hsa_circRNA_103993
11	hsa_circRNA_100364
12	hsa_circRNA_100380
13	hsa_circRNA_100352
14	hsa_circRNA_102328
15	hsa_circRNA_101902
16	hsa_circRNA_104168
17	hsa_circRNA_100583
18	hsa_circRNA_103437
19	hsa_circRNA_102255
20	hsa_circRNA_104645
21	hsa_circRNA_103110
22	hsa_circRNA_100146
23	hsa_circRNA_102265
24	hsa_circRNA_100656
25	hsa_circRNA_101056
26	hsa_circRNA_104103
27	hsa_circRNA_400029
28	hsa_circRNA_103017
29	hsa_circRNA_002111
30	hsa_circRNA_104948
31	hsa_circRNA_102034
32	hsa_circRNA_101319
33	hsa_circRNA_100977
34	hsa_circRNA_001506
35	hsa_circRNA_102417
36	hsa_circRNA_104532
37	hsa_circRNA_103111
38	hsa_circRNA_100084
39	hsa_circRNA_102559
40	hsa_circRNA_102711
41	hsa_circRNA_100269
42	hsa_circRNA_104250
43	hsa_circRNA_100363
44	hsa_circRNA_103510
45	hsa_circRNA_101245
46	hsa_circRNA_100754
47	hsa_circRNA_100533
48	hsa_circRNA_100381
49	hsa_circRNA_100246
50	hsa_circRNA_001886
51	hsa_circRNA_101638
52	hsa_circRNA_101360
53	hsa_circRNA_100737
54	hsa_circRNA_104566
55	hsa_circRNA_101431
56	hsa_circRNA_103560
57	hsa_circRNA_103038
58	hsa_circRNA_100034
59	hsa_circRNA_001676
60	hsa_circRNA_104870
61	hsa_circRNA_103803
62	hsa_circRNA_001671
63	hsa_circRNA_101085
64	hsa_circRNA_101314
65	hsa_circRNA_100355
66	hsa_circRNA_103737
67	hsa_circRNA_104575
68	hsa_circRNA_101287
69	hsa_circRNA_103966
70	hsa_circRNA_100653
71	hsa_circRNA_104802
72	hsa_circRNA_001959
73	hsa_circRNA_103511
74	hsa_circRNA_100213
75	hsa_circRNA_001503
76	hsa_circRNA_101270
77	hsa_circRNA_104764
78	hsa_circRNA_103514
79	hsa_circRNA_104374
80	hsa_circRNA_102737
81	hsa_circRNA_101292
82	hsa_circRNA_101470
83	hsa_circRNA_103736
84	hsa_circRNA_400087
85	hsa_circRNA_102480
86	hsa_circRNA_400062
87	hsa_circRNA_103254
88	hsa_circRNA_103695
89	hsa_circRNA_100204
90	hsa_circRNA_103887
91	hsa_circRNA_104754
92	hsa_circRNA_101066
93	hsa_circRNA_101618
94	hsa_circRNA_103491
95	hsa_circRNA_100351
96	hsa_circRNA_103129
97	hsa_circRNA_103559
98	hsa_circRNA_100956
99	hsa_circRNA_101628
100	hsa_circRNA_103493
101	hsa_circRNA_100037
102	hsa_circRNA_104812
103	hsa_circRNA_103513
104	hsa_circRNA_102894
105	hsa_circRNA_102995
106	hsa_circRNA_101994
107	hsa_circRNA_103870
108	hsa_circRNA_100239
109	hsa_circRNA_100053
110	hsa_circRNA_101850
111	hsa_circRNA_100503
112	hsa_circRNA_100808
113	hsa_circRNA_101233
114	hsa_circRNA_104341
115	hsa_circRNA_104700
116	hsa_circRNA_101768
117	hsa_circRNA_103264
118	hsa_circRNA_103102
119	hsa_circRNA_102415
120	hsa_circRNA_101728
121	hsa_circRNA_103488
122	hsa_circRNA_100720
123	hsa_circRNA_000571
124	hsa_circRNA_001059
125	hsa_circRNA_101957
126	hsa_circRNA_103230
127	hsa_circRNA_103490
128	hsa_circRNA_103033
129	hsa_circRNA_103492
130	hsa_circRNA_101778
131	hsa_circRNA_101903
132	hsa_circRNA_100970
133	hsa_circRNA_103312
134	hsa_circRNA_102264
135	hsa_circRNA_104664
136	hsa_circRNA_101204
137	hsa_circRNA_101318
138	hsa_circRNA_100051
139	hsa_circRNA_101555
140	hsa_circRNA_100297
141	hsa_circRNA_104233
142	hsa_circRNA_103871
143	hsa_circRNA_102414
144	hsa_circRNA_102760
145	hsa_circRNA_104708
146	hsa_circRNA_102629
147	hsa_circRNA_002011
148	hsa_circRNA_104701
149	hsa_circRNA_101462
150	hsa_circRNA_103829
151	hsa_circRNA_100192
152	hsa_circRNA_105049
153	hsa_circRNA_104930
154	hsa_circRNA_001914
155	hsa_circRNA_102018
156	hsa_circRNA_100033
157	hsa_circRNA_103985
158	hsa_circRNA_100735
159	hsa_circRNA_104599
160	hsa_circRNA_101295
161	hsa_circRNA_101839
162	hsa_circRNA_102831
163	hsa_circRNA_104931
164	hsa_circRNA_102538
165	hsa_circRNA_100089
166	hsa_circRNA_102644
167	hsa_circRNA_102584
168	hsa_circRNA_101232
169	hsa_circRNA_101425
170	hsa_circRNA_100850
171	hsa_circRNA_105050
172	hsa_circRNA_000166
173	hsa_circRNA_100620
174	hsa_circRNA_104619
175	hsa_circRNA_001040
176	hsa_circRNA_104718
177	hsa_circRNA_102097
178	hsa_circRNA_103204
179	hsa_circRNA_103992
180	hsa_circRNA_100016
181	hsa_circRNA_100230
182	hsa_circRNA_101102
183	hsa_circRNA_000041
184	hsa_circRNA_103951
185	hsa_circRNA_101873
186	hsa_circRNA_104650
187	hsa_circRNA_100357
188	hsa_circRNA_101580
189	hsa_circRNA_101015
190	hsa_circRNA_102713
191	hsa_circRNA_104462
192	hsa_circRNA_100141
193	hsa_circRNA_002117
194	hsa_circRNA_104949
195	hsa_circRNA_102098
196	hsa_circRNA_103219
197	hsa_circRNA_002178
198	hsa_circRNA_103450
199	hsa_circRNA_104959
200	hsa_circRNA_101408
201	hsa_circRNA_101581
202	hsa_circRNA_000167
203	hsa_circRNA_102033
204	hsa_circRNA_104574
205	hsa_circRNA_100771
206	hsa_circRNA_102712
207	hsa_circRNA_102424
208	hsa_circRNA_101338
209	hsa_circRNA_101076
210	hsa_circRNA_002172
211	hsa_circRNA_102479
212	hsa_circRNA_102245
213	hsa_circRNA_102455
214	hsa_circRNA_101469
215	hsa_circRNA_103252
216	hsa_circRNA_100806
217	hsa_circRNA_103512
218	hsa_circRNA_101011
219	hsa_circRNA_101069
220	hsa_circRNA_101589
221	hsa_circRNA_103572
222	hsa_circRNA_100559
223	hsa_circRNA_102197
224	hsa_circRNA_001379
225	hsa_circRNA_102483
226	hsa_circRNA_103813
227	hsa_circRNA_102442
228	hsa_circRNA_101484
229	hsa_circRNA_102329
230	hsa_circRNA_103454
231	hsa_circRNA_103365
232	hsa_circRNA_102054
233	hsa_circRNA_102771
234	hsa_circRNA_101009
235	hsa_circRNA_100478
236	hsa_circRNA_102421
237	hsa_circRNA_102499
238	hsa_circRNA_100038
239	hsa_circRNA_100207
240	hsa_circRNA_102020
241	hsa_circRNA_001846
242	hsa_circRNA_101274
243	hsa_circRNA_104950
244	hsa_circRNA_102059
245	hsa_circRNA_103899
246	hsa_circRNA_101965
247	hsa_circRNA_104733
248	hsa_circRNA_104929
249	hsa_circRNA_101923
250	hsa_circRNA_103605
251	hsa_circRNA_100136
252	hsa_circRNA_100831
253	hsa_circRNA_101510
254	hsa_circRNA_102517
255	hsa_circRNA_102069
256	hsa_circRNA_100072
257	hsa_circRNA_101767
258	hsa_circRNA_102385
259	hsa_circRNA_100188
260	hsa_circRNA_104600
261	hsa_circRNA_101636
262	hsa_circRNA_101710
263	hsa_circRNA_104951
264	hsa_circRNA_101109
265	hsa_circRNA_100571
266	hsa_circRNA_100679
267	hsa_circRNA_101906
268	hsa_circRNA_104911
269	hsa_circRNA_102297
270	hsa_circRNA_104963
271	hsa_circRNA_101926
272	hsa_circRNA_104256
273	hsa_circRNA_103023
274	hsa_circRNA_101925
275	hsa_circRNA_102267
276	hsa_circRNA_100976
277	hsa_circRNA_101263
278	hsa_circRNA_103408
279	hsa_circRNA_104207
280	hsa_circRNA_100691
281	hsa_circRNA_100385
282	hsa_circRNA_100791
283	hsa_circRNA_103487
284	hsa_circRNA_104649
285	hsa_circRNA_102393
286	hsa_circRNA_103647
287	hsa_circRNA_104939
288	hsa_circRNA_100597
289	hsa_circRNA_100248
290	hsa_circRNA_104938
291	hsa_circRNA_101463
292	hsa_circRNA_000552
293	hsa_circRNA_103719
294	hsa_circRNA_102546
295	hsa_circRNA_104405
296	hsa_circRNA_101827
297	hsa_circRNA_104401
298	hsa_circRNA_000585
299	hsa_circRNA_102211
300	hsa_circRNA_102411
301	hsa_circRNA_104656
302	hsa_circRNA_104411
303	hsa_circRNA_102728
304	hsa_circRNA_101720
305	hsa_circRNA_102045
306	hsa_circRNA_103740
307	hsa_circRNA_103504
308	hsa_circRNA_103262
309	hsa_circRNA_103837
310	hsa_circRNA_102933
311	hsa_circRNA_104522
312	hsa_circRNA_100152
313	hsa_circRNA_102974
314	hsa_circRNA_104620
315	hsa_circRNA_002149
316	hsa_circRNA_102115
317	hsa_circRNA_100593
318	hsa_circRNA_102159
319	hsa_circRNA_102070
320	hsa_circRNA_102374
321	hsa_circRNA_104022
322	hsa_circRNA_101905
323	hsa_circRNA_103164
324	hsa_circRNA_104095
325	hsa_circRNA_103723
326	hsa_circRNA_002144
327	hsa_circRNA_103021
328	hsa_circRNA_100989
329	hsa_circRNA_104946
330	hsa_circRNA_101531
331	hsa_circRNA_104235
332	hsa_circRNA_101508
333	hsa_circRNA_104435
334	hsa_circRNA_101123
335	hsa_circRNA_104833
336	hsa_circRNA_103635
337	hsa_circRNA_100779
338	hsa_circRNA_103614
339	hsa_circRNA_101932
340	hsa_circRNA_000274
341	hsa_circRNA_102500
342	hsa_circRNA_104269
343	hsa_circRNA_102613
344	hsa_circRNA_400033
345	hsa_circRNA_100614
346	hsa_circRNA_105035
347	hsa_circRNA_101639
348	hsa_circRNA_104031
349	hsa_circRNA_100191
350	hsa_circRNA_103505
351	hsa_circRNA_103898
352	hsa_circRNA_103904
353	hsa_circRNA_100630
354	hsa_circRNA_103489
355	hsa_circRNA_002050
356	hsa_circRNA_103211
357	hsa_circRNA_104983
358	hsa_circRNA_101217
359	hsa_circRNA_100883
360	hsa_circRNA_103967
361	hsa_circRNA_105025
362	hsa_circRNA_101958
363	hsa_circRNA_104513
364	hsa_circRNA_102449
365	hsa_circRNA_103696
366	hsa_circRNA_001302
367	hsa_circRNA_103239
368	hsa_circRNA_001678
369	hsa_circRNA_001754
370	hsa_circRNA_103128
371	hsa_circRNA_400043
372	hsa_circRNA_104493
373	hsa_circRNA_101854
374	hsa_circRNA_101145
375	hsa_circRNA_104581
376	hsa_circRNA_104932
377	hsa_circRNA_102744
378	hsa_circRNA_102628
379	hsa_circRNA_100993
380	hsa_circRNA_100086
381	hsa_circRNA_102422
382	hsa_circRNA_102371
383	hsa_circRNA_100782
384	hsa_circRNA_104154
385	hsa_circRNA_104381
386	hsa_circRNA_000993
387	hsa_circRNA_000104
388	hsa_circRNA_103790
389	hsa_circRNA_103623
390	hsa_circRNA_104096
391	hsa_circRNA_102714
392	hsa_circRNA_101828
393	hsa_circRNA_102587
394	hsa_circRNA_103127
395	hsa_circRNA_104400
396	hsa_circRNA_104927
397	hsa_circRNA_104504
398	hsa_circRNA_000410
399	hsa_circRNA_103998
400	hsa_circRNA_101706
401	hsa_circRNA_101227
402	hsa_circRNA_100382
403	hsa_circRNA_101458
404	hsa_circRNA_102704
405	hsa_circRNA_100298
406	hsa_circRNA_103484
407	hsa_circRNA_103448
408	hsa_circRNA_103130
409	hsa_circRNA_001288
410	hsa_circRNA_101951
411	hsa_circRNA_102077
412	hsa_circRNA_102304
413	hsa_circRNA_101954
414	hsa_circRNA_102746
415	hsa_circRNA_104123
416	hsa_circRNA_102527
417	hsa_circRNA_102196
418	hsa_circRNA_100840
419	hsa_circRNA_100892
420	hsa_circRNA_101559
421	hsa_circRNA_100173
422	hsa_circRNA_400067
423	hsa_circRNA_103039
424	hsa_circRNA_100180
425	hsa_circRNA_105013
426	hsa_circRNA_100010
427	hsa_circRNA_100440
428	hsa_circRNA_103253
429	hsa_circRNA_102948
430	hsa_circRNA_104050
431	hsa_circRNA_101282
432	hsa_circRNA_100611
433	hsa_circRNA_104084
434	hsa_circRNA_102268
435	hsa_circRNA_101907
436	hsa_circRNA_101404
437	hsa_circRNA_100548
438	hsa_circRNA_102146
439	hsa_circRNA_101252
440	hsa_circRNA_103417
441	hsa_circRNA_101180
442	hsa_circRNA_103686
443	hsa_circRNA_100157
444	hsa_circRNA_101205
445	hsa_circRNA_100395
446	hsa_circRNA_100960
447	hsa_circRNA_102262
448	hsa_circRNA_002045
449	hsa_circRNA_103789
450	hsa_circRNA_400059
451	hsa_circRNA_102173
452	hsa_circRNA_101427
453	hsa_circRNA_101178
454	hsa_circRNA_100012
455	hsa_circRNA_001264
456	hsa_circRNA_102043
457	hsa_circRNA_100104
458	hsa_circRNA_103532
459	hsa_circRNA_103677
460	hsa_circRNA_100147
461	hsa_circRNA_103547
462	hsa_circRNA_400056
463	hsa_circRNA_103452
464	hsa_circRNA_400066
465	hsa_circRNA_101050
466	hsa_circRNA_102625
467	hsa_circRNA_101025
468	hsa_circRNA_103503
469	hsa_circRNA_101434
470	hsa_circRNA_103579
471	hsa_circRNA_102130
472	hsa_circRNA_100625
473	hsa_circRNA_101201
474	hsa_circRNA_101596
475	hsa_circRNA_100517
476	hsa_circRNA_000486
477	hsa_circRNA_102139
478	hsa_circRNA_101388
479	hsa_circRNA_103968
480	hsa_circRNA_100445
481	hsa_circRNA_100319
482	hsa_circRNA_103168
483	hsa_circRNA_400027
484	hsa_circRNA_101785
485	hsa_circRNA_101924
486	hsa_circRNA_103506
487	hsa_circRNA_001072
488	hsa_circRNA_100257
489	hsa_circRNA_104494
490	hsa_circRNA_104810
491	hsa_circRNA_104973
492	hsa_circRNA_104970
493	hsa_circRNA_101141
494	hsa_circRNA_104285
495	hsa_circRNA_101161
496	hsa_circRNA_001583
497	hsa_circRNA_100066
498	hsa_circRNA_101795
499	hsa_circRNA_102475
500	hsa_circRNA_101651
501	hsa_circRNA_100252
502	hsa_circRNA_102325
503	hsa_circRNA_102478
504	hsa_circRNA_102761
505	hsa_circRNA_102774
506	hsa_circRNA_100052
507	hsa_circRNA_104705
508	hsa_circRNA_102463
509	hsa_circRNA_102261
510	hsa_circRNA_102105
511	hsa_circRNA_102991
512	hsa_circRNA_102322
513	hsa_circRNA_101970
514	hsa_circRNA_103749
515	hsa_circRNA_101735
516	hsa_circRNA_102672
517	hsa_circRNA_001405
518	hsa_circRNA_000481
519	hsa_circRNA_100534
520	hsa_circRNA_000764
521	hsa_circRNA_105037
522	hsa_circRNA_104193
523	hsa_circRNA_104846
524	hsa_circRNA_100228
525	hsa_circRNA_102637
526	hsa_circRNA_103212
527	hsa_circRNA_100621
528	hsa_circRNA_101415
529	hsa_circRNA_103347
530	hsa_circRNA_101127
531	hsa_circRNA_104281
532	hsa_circRNA_101591
533	hsa_circRNA_104864
534	hsa_circRNA_101307
535	hsa_circRNA_100670
536	hsa_circRNA_101392
537	hsa_circRNA_100542
538	hsa_circRNA_104077
539	hsa_circRNA_101746
540	hsa_circRNA_102266
541	hsa_circRNA_104936
542	hsa_circRNA_101248
543	hsa_circRNA_104761
544	hsa_circRNA_102838
545	hsa_circRNA_100342
546	hsa_circRNA_100920
547	hsa_circRNA_103134
548	hsa_circRNA_100015
549	hsa_circRNA_100407
550	hsa_circRNA_102140
551	hsa_circRNA_102571
552	hsa_circRNA_104268
553	hsa_circRNA_102341
554	hsa_circRNA_104866
555	hsa_circRNA_102575
556	hsa_circRNA_102563
557	hsa_circRNA_101741
558	hsa_circRNA_101447
559	hsa_circRNA_104065
560	hsa_circRNA_102989
561	hsa_circRNA_103073
562	hsa_circRNA_100004
563	hsa_circRNA_102702
564	hsa_circRNA_100345
565	hsa_circRNA_104439
566	hsa_circRNA_102234
567	hsa_circRNA_102741
568	hsa_circRNA_100980
569	hsa_circRNA_103085
570	hsa_circRNA_102423
571	hsa_circRNA_103371
572	hsa_circRNA_104974
573	hsa_circRNA_102602
574	hsa_circRNA_101142
575	hsa_circRNA_100479
576	hsa_circRNA_104510
577	hsa_circRNA_100610
578	hsa_circRNA_101272
579	hsa_circRNA_101202
580	hsa_circRNA_104383
581	hsa_circRNA_102832
582	hsa_circRNA_104897
583	hsa_circRNA_100110
584	hsa_circRNA_102046
585	hsa_circRNA_103082
586	hsa_circRNA_000864
587	hsa_circRNA_104688
588	hsa_circRNA_101743
589	hsa_circRNA_100677
590	hsa_circRNA_102382
591	hsa_circRNA_100916
592	hsa_circRNA_102331
593	hsa_circRNA_104424
594	hsa_circRNA_104166
595	hsa_circRNA_102392
596	hsa_circRNA_100997
597	hsa_circRNA_104858
598	hsa_circRNA_101862
599	hsa_circRNA_104434
600	hsa_circRNA_100629
601	hsa_circRNA_102161
602	hsa_circRNA_103327
603	hsa_circRNA_101405
604	hsa_circRNA_100810
605	hsa_circRNA_104852
606	hsa_circRNA_103862
607	hsa_circRNA_100546
608	hsa_circRNA_101061
609	hsa_circRNA_101278
610	hsa_circRNA_104336
611	hsa_circRNA_100994
612	hsa_circRNA_103812
613	hsa_circRNA_101306
614	hsa_circRNA_101670
615	hsa_circRNA_104368
616	hsa_circRNA_100085
617	hsa_circRNA_400077
618	hsa_circRNA_104111
619	hsa_circRNA_100876
620	hsa_circRNA_100299
621	hsa_circRNA_104205
622	hsa_circRNA_104313
623	hsa_circRNA_100227
624	hsa_circRNA_105026
625	hsa_circRNA_400064
626	hsa_circRNA_101904
627	hsa_circRNA_100604
628	hsa_circRNA_103706
629	hsa_circRNA_101780
630	hsa_circRNA_103328
631	hsa_circRNA_101987
632	hsa_circRNA_104803
633	hsa_circRNA_102814
634	hsa_circRNA_102150
635	hsa_circRNA_000987
636	hsa_circRNA_103903
637	hsa_circRNA_104835
638	hsa_circRNA_100044
639	hsa_circRNA_104661
640	hsa_circRNA_103367
641	hsa_circRNA_103691
642	hsa_circRNA_002106
643	hsa_circRNA_100292
644	hsa_circRNA_102725
645	hsa_circRNA_100041
646	hsa_circRNA_103714
647	hsa_circRNA_104465
648	hsa_circRNA_101879
649	hsa_circRNA_100895
650	hsa_circRNA_100982
651	hsa_circRNA_104192
652	hsa_circRNA_100842
653	hsa_circRNA_103710
654	hsa_circRNA_104220
655	hsa_circRNA_100815
656	hsa_circRNA_103753
657	hsa_circRNA_101766
658	hsa_circRNA_102008
659	hsa_circRNA_104915
660	hsa_circRNA_400011
661	hsa_circRNA_104922
662	hsa_circRNA_001038
663	hsa_circRNA_103159
664	hsa_circRNA_103834
665	hsa_circRNA_100029
666	hsa_circRNA_100206
667	hsa_circRNA_103119
668	hsa_circRNA_100820
669	hsa_circRNA_104236
670	hsa_circRNA_104771
671	hsa_circRNA_101466
672	hsa_circRNA_103148
673	hsa_circRNA_100913
674	hsa_circRNA_104582
675	hsa_circRNA_104862
676	hsa_circRNA_400095
677	hsa_circRNA_103997
678	hsa_circRNA_100893
679	hsa_circRNA_101474
680	hsa_circRNA_103597
681	hsa_circRNA_101820
682	hsa_circRNA_101103
683	hsa_circRNA_104821
684	hsa_circRNA_101260
685	hsa_circRNA_103276
686	hsa_circRNA_102913
687	hsa_circRNA_103259
688	hsa_circRNA_104475
689	hsa_circRNA_101757
690	hsa_circRNA_103122
691	hsa_circRNA_101630
692	hsa_circRNA_101967
693	hsa_circRNA_102600
694	hsa_circRNA_104814
695	hsa_circRNA_100531
696	hsa_circRNA_000596
697	hsa_circRNA_101444
698	hsa_circRNA_100783
699	hsa_circRNA_101492
700	hsa_circRNA_100802
701	hsa_circRNA_101522
702	hsa_circRNA_100018
703	hsa_circRNA_103621
704	hsa_circRNA_101500
705	hsa_circRNA_103879
706	hsa_circRNA_102619
707	hsa_circRNA_101407
708	hsa_circRNA_100530
709	hsa_circRNA_100996
710	hsa_circRNA_104310
711	hsa_circRNA_103199
712	hsa_circRNA_101213
713	hsa_circRNA_100988
714	hsa_circRNA_100751
715	hsa_circRNA_103814
716	hsa_circRNA_101387
717	hsa_circRNA_102871
718	hsa_circRNA_000792
719	hsa_circRNA_101695
720	hsa_circRNA_100326
721	hsa_circRNA_103712
722	hsa_circRNA_102134
723	hsa_circRNA_103160
724	hsa_circRNA_104156
725	hsa_circRNA_104834
726	hsa_circRNA_102012
727	hsa_circRNA_102798
728	hsa_circRNA_103340
729	hsa_circRNA_104527
730	hsa_circRNA_104584
731	hsa_circRNA_104602
732	hsa_circRNA_104110
733	hsa_circRNA_103012
734	hsa_circRNA_101243
735	hsa_circRNA_101368
736	hsa_circRNA_102670
737	hsa_circRNA_102487
738	hsa_circRNA_100040
739	hsa_circRNA_100974
740	hsa_circRNA_102484
741	hsa_circRNA_103639
742	hsa_circRNA_100387
743	hsa_circRNA_102403
744	hsa_circRNA_100907
745	hsa_circRNA_103849
746	hsa_circRNA_400051
747	hsa_circRNA_103630
748	hsa_circRNA_101928
749	hsa_circRNA_102541
750	hsa_circRNA_100117
751	hsa_circRNA_102889
752	hsa_circRNA_102723
753	hsa_circRNA_103256
754	hsa_circRNA_400089
755	hsa_circRNA_105019
756	hsa_circRNA_104487
757	hsa_circRNA_100668
758	hsa_circRNA_100332
759	hsa_circRNA_101534
760	hsa_circRNA_103472
761	hsa_circRNA_104781
762	hsa_circRNA_102910
763	hsa_circRNA_100917
764	hsa_circRNA_102416
765	hsa_circRNA_100705
766	hsa_circRNA_104565
767	hsa_circRNA_103307
768	hsa_circRNA_001241
769	hsa_circRNA_102224
770	hsa_circRNA_101115
771	hsa_circRNA_102895
772	hsa_circRNA_100987
773	hsa_circRNA_103351
774	hsa_circRNA_101138
775	hsa_circRNA_103888
776	hsa_circRNA_104855
777	hsa_circRNA_101495
778	hsa_circRNA_103456
779	hsa_circRNA_001175
780	hsa_circRNA_102806
781	hsa_circRNA_100972
782	hsa_circRNA_101914
783	hsa_circRNA_103313
784	hsa_circRNA_104302
785	hsa_circRNA_400014
786	hsa_circRNA_104503
787	hsa_circRNA_100943
788	hsa_circRNA_100664
789	hsa_circRNA_104157
790	hsa_circRNA_101253
791	hsa_circRNA_102011
792	hsa_circRNA_101800
793	hsa_circRNA_101106
794	hsa_circRNA_104824
795	hsa_circRNA_104488
796	hsa_circRNA_101753
797	hsa_circRNA_100331
798	hsa_circRNA_102535
799	hsa_circRNA_103978
800	hsa_circRNA_103036
801	hsa_circRNA_100168
802	hsa_circRNA_100433
803	hsa_circRNA_101661
804	hsa_circRNA_102260
805	hsa_circRNA_102506
806	hsa_circRNA_103333
807	hsa_circRNA_104478
808	hsa_circRNA_103246
809	hsa_circRNA_104200
810	hsa_circRNA_104521
811	hsa_circRNA_001950
812	hsa_circRNA_103608
813	hsa_circRNA_102228
814	hsa_circRNA_102292
815	hsa_circRNA_100875
816	hsa_circRNA_101883
817	hsa_circRNA_104023
818	hsa_circRNA_104996
819	hsa_circRNA_104840
820	hsa_circRNA_102993
821	hsa_circRNA_000042
822	hsa_circRNA_104497
823	hsa_circRNA_103411
824	hsa_circRNA_104903
825	hsa_circRNA_103956
826	hsa_circRNA_101323
827	hsa_circRNA_101101
828	hsa_circRNA_102981
829	hsa_circRNA_102397
830	hsa_circRNA_000280
831	hsa_circRNA_101727
832	hsa_circRNA_400049
833	hsa_circRNA_102825
834	hsa_circRNA_103533
835	hsa_circRNA_102543
836	hsa_circRNA_103994
837	hsa_circRNA_100409
838	hsa_circRNA_101693
839	hsa_circRNA_103295
840	hsa_circRNA_102041
841	hsa_circRNA_102229
842	hsa_circRNA_102118
843	hsa_circRNA_103217
844	hsa_circRNA_100626
845	hsa_circRNA_104694
846	hsa_circRNA_103028
847	hsa_circRNA_100383
848	hsa_circRNA_103250
849	hsa_circRNA_103893
850	hsa_circRNA_101964
851	hsa_circRNA_102534
852	hsa_circRNA_101893
853	hsa_circRNA_103977
854	hsa_circRNA_100488
855	hsa_circRNA_100425
856	hsa_circRNA_100107
857	hsa_circRNA_101517
858	hsa_circRNA_102715
859	hsa_circRNA_104896
860	hsa_circRNA_103798
861	hsa_circRNA_103103
862	hsa_circRNA_104055
863	hsa_circRNA_105036
864	hsa_circRNA_102226
865	hsa_circRNA_104357
866	hsa_circRNA_102271
867	hsa_circRNA_103641
868	hsa_circRNA_100020
869	hsa_circRNA_100710
870	hsa_circRNA_102398
871	hsa_circRNA_102254
872	hsa_circRNA_001170
873	hsa_circRNA_102082
874	hsa_circRNA_101775
875	hsa_circRNA_102375
876	hsa_circRNA_103861
877	hsa_circRNA_102089
878	hsa_circRNA_103350
879	hsa_circRNA_102915
880	hsa_circRNA_103781
881	hsa_circRNA_101759
882	hsa_circRNA_103856
883	hsa_circRNA_400042
884	hsa_circRNA_102549
885	hsa_circRNA_102312
886	hsa_circRNA_102661
887	hsa_circRNA_102949
888	hsa_circRNA_101918
889	hsa_circRNA_104058
890	hsa_circRNA_101055
891	hsa_circRNA_101842
892	hsa_circRNA_100449
893	hsa_circRNA_103188
894	hsa_circRNA_104987
895	hsa_circRNA_400044
896	hsa_circRNA_102531
897	hsa_circRNA_102754
898	hsa_circRNA_100775
899	hsa_circRNA_100565
900	hsa_circRNA_100405
901	hsa_circRNA_103189
902	hsa_circRNA_100024
903	hsa_circRNA_104075
904	hsa_circRNA_101536
905	hsa_circRNA_102720
906	hsa_circRNA_100205
907	hsa_circRNA_103548
908	hsa_circRNA_100526
909	hsa_circRNA_104230
910	hsa_circRNA_103772
911	hsa_circRNA_102592
912	hsa_circRNA_101810
913	hsa_circRNA_101688
914	hsa_circRNA_101857
915	hsa_circRNA_103060
916	hsa_circRNA_101527
917	hsa_circRNA_103964
918	hsa_circRNA_104652
919	hsa_circRNA_104259
920	hsa_circRNA_101486
921	hsa_circRNA_102513
922	hsa_circRNA_104953
923	hsa_circRNA_101848
924	hsa_circRNA_102119
925	hsa_circRNA_100770
926	hsa_circRNA_100848
927	hsa_circRNA_100528
928	hsa_circRNA_102171
929	hsa_circRNA_102379
930	hsa_circRNA_104468
931	hsa_circRNA_103290
932	hsa_circRNA_000881
933	hsa_circRNA_103999
934	hsa_circRNA_103209
935	hsa_circRNA_100149
936	hsa_circRNA_100740
937	hsa_circRNA_103528
938	hsa_circRNA_101176
939	hsa_circRNA_103689
940	hsa_circRNA_101312
941	hsa_circRNA_103555
942	hsa_circRNA_101094
943	hsa_circRNA_101187
944	hsa_circRNA_103806
945	hsa_circRNA_103010
946	hsa_circRNA_000936
947	hsa_circRNA_100646
948	hsa_circRNA_000623
949	hsa_circRNA_104616
950	hsa_circRNA_101313
951	hsa_circRNA_103519
952	hsa_circRNA_104755
953	hsa_circRNA_103524
954	hsa_circRNA_103935
955	hsa_circRNA_104165
956	hsa_circRNA_103220
957	hsa_circRNA_101062
958	hsa_circRNA_100048
959	hsa_circRNA_100494
960	hsa_circRNA_103479
961	hsa_circRNA_101296
962	hsa_circRNA_101402
963	hsa_circRNA_101579
964	hsa_circRNA_100310
965	hsa_circRNA_102213
966	hsa_circRNA_103384
967	hsa_circRNA_100669
968	hsa_circRNA_102155
969	hsa_circRNA_100156
970	hsa_circRNA_101889
971	hsa_circRNA_102399
972	hsa_circRNA_100113
973	hsa_circRNA_103588
974	hsa_circRNA_001030
975	hsa_circRNA_103540
976	hsa_circRNA_102735
977	hsa_circRNA_102158
978	hsa_circRNA_000911
979	hsa_circRNA_104589
980	hsa_circRNA_102590
981	hsa_circRNA_104307
982	hsa_circRNA_102106
983	hsa_circRNA_000750
984	hsa_circRNA_104872
985	hsa_circRNA_101943
986	hsa_circRNA_103529
987	hsa_circRNA_103166
988	hsa_circRNA_103974
989	hsa_circRNA_101597
990	hsa_circRNA_100637
991	hsa_circRNA_100111
992	hsa_circRNA_100438
993	hsa_circRNA_102961
994	hsa_circRNA_103405
995	hsa_circRNA_101325
996	hsa_circRNA_400101
997	hsa_circRNA_102567
998	hsa_circRNA_100882
999	hsa_circRNA_104917
1000	hsa_circRNA_103852
1001	hsa_circRNA_103788
1002	hsa_circRNA_101175
1003	hsa_circRNA_103913
1004	hsa_circRNA_101283
1005	hsa_circRNA_104466
1006	hsa_circRNA_104244
1007	hsa_circRNA_101420
1008	hsa_circRNA_104333
1009	hsa_circRNA_103826
1010	hsa_circRNA_104800
1011	hsa_circRNA_400071
1012	hsa_circRNA_103669
1013	hsa_circRNA_104720
1014	hsa_circRNA_102980
1015	hsa_circRNA_102465
1016	hsa_circRNA_102172
1017	hsa_circRNA_103566
1018	hsa_circRNA_104342
1019	hsa_circRNA_101386
1020	hsa_circRNA_000455
1021	hsa_circRNA_102885
1022	hsa_circRNA_101013
1023	hsa_circRNA_102888
1024	hsa_circRNA_101901
1025	hsa_circRNA_100910
1026	hsa_circRNA_103414
1027	hsa_circRNA_105012
1028	hsa_circRNA_100794
1029	hsa_circRNA_101509
1030	hsa_circRNA_100402
1031	hsa_circRNA_104387
1032	hsa_circRNA_102127
1033	hsa_circRNA_103554
1034	hsa_circRNA_101269
1035	hsa_circRNA_101128
1036	hsa_circRNA_102039
1037	hsa_circRNA_103847
1038	hsa_circRNA_104428
1039	hsa_circRNA_103957
1040	hsa_circRNA_100388
1041	hsa_circRNA_103808
1042	hsa_circRNA_101832
1043	hsa_circRNA_103855
1044	hsa_circRNA_100276
1045	hsa_circRNA_104283
1046	hsa_circRNA_102759
1047	hsa_circRNA_100574
1048	hsa_circRNA_100349
1049	hsa_circRNA_103711
1050	hsa_circRNA_102938
1051	hsa_circRNA_102217
1052	hsa_circRNA_104266
1053	hsa_circRNA_104034
1054	hsa_circRNA_102445
1055	hsa_circRNA_101675
1056	hsa_circRNA_103637
1057	hsa_circRNA_102544
1058	hsa_circRNA_102240
1059	hsa_circRNA_103805
1060	hsa_circRNA_100615
1061	hsa_circRNA_103735
1062	hsa_circRNA_100721
1063	hsa_circRNA_102456
1064	hsa_circRNA_100909
1065	hsa_circRNA_102998
1066	hsa_circRNA_103356
1067	hsa_circRNA_101656
1068	hsa_circRNA_103041
1069	hsa_circRNA_104678
1070	hsa_circRNA_102014
1071	hsa_circRNA_100634
1072	hsa_circRNA_100616
1073	hsa_circRNA_101560
1074	hsa_circRNA_104210
1075	hsa_circRNA_102749
1076	hsa_circRNA_103784
1077	hsa_circRNA_104149
1078	hsa_circRNA_101876
1079	hsa_circRNA_102927
1080	hsa_circRNA_103830
1081	hsa_circRNA_103193
1082	hsa_circRNA_001067
1083	hsa_circRNA_100811
1084	hsa_circRNA_100259
1085	hsa_circRNA_104354
1086	hsa_circRNA_103444
1087	hsa_circRNA_100853
1088	hsa_circRNA_101740
1089	hsa_circRNA_102051
1090	hsa_circRNA_103191
1091	hsa_circRNA_100498
1092	hsa_circRNA_102116
1093	hsa_circRNA_100609
1094	hsa_circRNA_102214
1095	hsa_circRNA_102694
1096	hsa_circRNA_100793
1097	hsa_circRNA_101771
1098	hsa_circRNA_104074
1099	hsa_circRNA_102438
1100	hsa_circRNA_102747
1101	hsa_circRNA_101763
1102	hsa_circRNA_102955
1103	hsa_circRNA_100788
1104	hsa_circRNA_101798
1105	hsa_circRNA_101332
1106	hsa_circRNA_102080
1107	hsa_circRNA_101185
1108	hsa_circRNA_101365
1109	hsa_circRNA_102440
1110	hsa_circRNA_101226
1111	hsa_circRNA_101938
1112	hsa_circRNA_001785
1113	hsa_circRNA_100017
1114	hsa_circRNA_103580
1115	hsa_circRNA_102473
1116	hsa_circRNA_103248
1117	hsa_circRNA_100071
1118	hsa_circRNA_104169
1119	hsa_circRNA_102007
1120	hsa_circRNA_102621
1121	hsa_circRNA_104747
1122	hsa_circRNA_002044
1123	hsa_circRNA_101315
1124	hsa_circRNA_100836
1125	hsa_circRNA_101846
1126	hsa_circRNA_000780
1127	hsa_circRNA_100662
1128	hsa_circRNA_101629
1129	hsa_circRNA_001896
1130	hsa_circRNA_104120
1131	hsa_circRNA_103944
1132	hsa_circRNA_101045
1133	hsa_circRNA_104314
1134	hsa_circRNA_102446
1135	hsa_circRNA_103126
1136	hsa_circRNA_101891
1137	hsa_circRNA_104837
1138	hsa_circRNA_101868
1139	hsa_circRNA_102836
1140	hsa_circRNA_101059
1141	hsa_circRNA_102951
1142	hsa_circRNA_100780
1143	hsa_circRNA_101181
1144	hsa_circRNA_101881
1145	hsa_circRNA_100623
1146	hsa_circRNA_100667
1147	hsa_circRNA_104590
1148	hsa_circRNA_100493
1149	hsa_circRNA_101067
1150	hsa_circRNA_101023
1151	hsa_circRNA_101351
1152	hsa_circRNA_000798
1153	hsa_circRNA_001654
1154	hsa_circRNA_104819
1155	hsa_circRNA_104453
1156	hsa_circRNA_101251
1157	hsa_circRNA_101692
1158	hsa_circRNA_100361
1159	hsa_circRNA_000676
1160	hsa_circRNA_102809
1161	hsa_circRNA_102025
1162	hsa_circRNA_001096
1163	hsa_circRNA_103549
1164	hsa_circRNA_103226
1165	hsa_circRNA_104204
1166	hsa_circRNA_100412
1167	hsa_circRNA_102576
1168	hsa_circRNA_103032
1169	hsa_circRNA_400093
1170	hsa_circRNA_001465
1171	hsa_circRNA_101937
1172	hsa_circRNA_101779
1173	hsa_circRNA_102050
1174	hsa_circRNA_104463
1175	hsa_circRNA_103551
1176	hsa_circRNA_100759
1177	hsa_circRNA_001594
1178	hsa_circRNA_100497
1179	hsa_circRNA_101632
1180	hsa_circRNA_102241
1181	hsa_circRNA_100861
1182	hsa_circRNA_100453
1183	hsa_circRNA_104445
1184	hsa_circRNA_102863
1185	hsa_circRNA_101698
1186	hsa_circRNA_100083
1187	hsa_circRNA_102972
1188	hsa_circRNA_101734
1189	hsa_circRNA_103447
1190	hsa_circRNA_103415
1191	hsa_circRNA_103470
1192	hsa_circRNA_100833
1193	hsa_circRNA_101264
1194	hsa_circRNA_101291
1195	hsa_circRNA_101646
1196	hsa_circRNA_100968
1197	hsa_circRNA_103518
1198	hsa_circRNA_103688
1199	hsa_circRNA_104097
1200	hsa_circRNA_104535
1201	hsa_circRNA_100435
1202	hsa_circRNA_100896
1203	hsa_circRNA_103238
1204	hsa_circRNA_103348
1205	hsa_circRNA_101052
1206	hsa_circRNA_103353
1207	hsa_circRNA_103833
1208	hsa_circRNA_104632
1209	hsa_circRNA_100539
1210	hsa_circRNA_104861
1211	hsa_circRNA_100148
1212	hsa_circRNA_102901
1213	hsa_circRNA_101989
1214	hsa_circRNA_102918
1215	hsa_circRNA_001937
1216	hsa_circRNA_100236
1217	hsa_circRNA_001952
1218	hsa_circRNA_101963
1219	hsa_circRNA_100939
1220	hsa_circRNA_101969
1221	hsa_circRNA_104045
1222	hsa_circRNA_102386
1223	hsa_circRNA_000815
1224	hsa_circRNA_100499
1225	hsa_circRNA_103916
1226	hsa_circRNA_100975
1227	hsa_circRNA_103094
1228	hsa_circRNA_104633
1229	hsa_circRNA_100189
1230	hsa_circRNA_101305
1231	hsa_circRNA_100750
1232	hsa_circRNA_102347
1233	hsa_circRNA_001109
1234	hsa_circRNA_100969
1235	hsa_circRNA_100426
1236	hsa_circRNA_001240
1237	hsa_circRNA_002042
1238	hsa_circRNA_101317
1239	hsa_circRNA_101654
1240	hsa_circRNA_102799
1241	hsa_circRNA_103925
1242	hsa_circRNA_104944
1243	hsa_circRNA_104559
1244	hsa_circRNA_102324
1245	hsa_circRNA_100671
1246	hsa_circRNA_104415
1247	hsa_circRNA_101655
1248	hsa_circRNA_102805
1249	hsa_circRNA_102999
1250	hsa_circRNA_102396
1251	hsa_circRNA_001978
1252	hsa_circRNA_001049
1253	hsa_circRNA_102482
1254	hsa_circRNA_100022
1255	hsa_circRNA_101610
1256	hsa_circRNA_000046
1257	hsa_circRNA_400030
1258	hsa_circRNA_104339
1259	hsa_circRNA_104679
1260	hsa_circRNA_001543
1261	hsa_circRNA_101711
1262	hsa_circRNA_104945
1263	hsa_circRNA_104568
1264	hsa_circRNA_100185
1265	hsa_circRNA_103587
1266	hsa_circRNA_101830
1267	hsa_circRNA_101169
1268	hsa_circRNA_104838
1269	hsa_circRNA_400083
1270	hsa_circRNA_103745
1271	hsa_circRNA_101363
1272	hsa_circRNA_100797
1273	hsa_circRNA_102157
1274	hsa_circRNA_100908
1275	hsa_circRNA_104243
1276	hsa_circRNA_100851
1277	hsa_circRNA_104311
1278	hsa_circRNA_102003
1279	hsa_circRNA_001653
1280	hsa_circRNA_104451
1281	hsa_circRNA_100461
1282	hsa_circRNA_103731
1283	hsa_circRNA_104597
1284	hsa_circRNA_104227
1285	hsa_circRNA_101372
1286	hsa_circRNA_103000
1287	hsa_circRNA_100062
1288	hsa_circRNA_400074
1289	hsa_circRNA_101412
1290	hsa_circRNA_102289
1291	hsa_circRNA_104203
1292	hsa_circRNA_103354
1293	hsa_circRNA_101717
1294	hsa_circRNA_102002
1295	hsa_circRNA_103989
1296	hsa_circRNA_103001
1297	hsa_circRNA_101834
1298	hsa_circRNA_400024
1299	hsa_circRNA_002048
1300	hsa_circRNA_103782
1301	hsa_circRNA_104609
1302	hsa_circRNA_101861
1303	hsa_circRNA_104666
1304	hsa_circRNA_101373
1305	hsa_circRNA_103666
1306	hsa_circRNA_103309
1307	hsa_circRNA_101744
1308	hsa_circRNA_104456
1309	hsa_circRNA_101063
1310	hsa_circRNA_104191
1311	hsa_circRNA_103080
1312	hsa_circRNA_102259
1313	hsa_circRNA_102719
1314	hsa_circRNA_101674
1315	hsa_circRNA_102208
1316	hsa_circRNA_102800
1317	hsa_circRNA_100209
1318	hsa_circRNA_102589
1319	hsa_circRNA_102349
1320	hsa_circRNA_101140
1321	hsa_circRNA_400008
1322	hsa_circRNA_101154
1323	hsa_circRNA_103050
1324	hsa_circRNA_102273
1325	hsa_circRNA_103701
1326	hsa_circRNA_101030
1327	hsa_circRNA_101615
1328	hsa_circRNA_104106
1329	hsa_circRNA_104763
1330	hsa_circRNA_103655
1331	hsa_circRNA_101900
1332	hsa_circRNA_102219
1333	hsa_circRNA_103498
1334	hsa_circRNA_102817
1335	hsa_circRNA_100027
1336	hsa_circRNA_103390
1337	hsa_circRNA_102562
1338	hsa_circRNA_102801
1339	hsa_circRNA_102148
1340	hsa_circRNA_104080
1341	hsa_circRNA_102073
1342	hsa_circRNA_104871
1343	hsa_circRNA_100099
1344	hsa_circRNA_104540
1345	hsa_circRNA_100073
1346	hsa_circRNA_101821
1347	hsa_circRNA_104170
1348	hsa_circRNA_101246
1349	hsa_circRNA_101853
1350	hsa_circRNA_103627
1351	hsa_circRNA_100242
1352	hsa_circRNA_100336
1353	hsa_circRNA_104816
1354	hsa_circRNA_101294
1355	hsa_circRNA_101979
1356	hsa_circRNA_104198
1357	hsa_circRNA_103059
1358	hsa_circRNA_104586
1359	hsa_circRNA_105018
1360	hsa_circRNA_101995
1361	hsa_circRNA_100374
1362	hsa_circRNA_104697
1363	hsa_circRNA_102586
1364	hsa_circRNA_101665
1365	hsa_circRNA_101147
1366	hsa_circRNA_100140
1367	hsa_circRNA_102121
1368	hsa_circRNA_102821
1369	hsa_circRNA_104140
1370	hsa_circRNA_103567
1371	hsa_circRNA_103137
1372	hsa_circRNA_102526
1373	hsa_circRNA_103586
1374	hsa_circRNA_103896
1375	hsa_circRNA_100800
1376	hsa_circRNA_102323
1377	hsa_circRNA_100644
1378	hsa_circRNA_104495
1379	hsa_circRNA_100633
1380	hsa_circRNA_103163
1381	hsa_circRNA_102188
1382	hsa_circRNA_100430
1383	hsa_circRNA_101718
1384	hsa_circRNA_102766
1385	hsa_circRNA_102053
1386	hsa_circRNA_100373
1387	hsa_circRNA_100360
1388	hsa_circRNA_101054
1389	hsa_circRNA_103177
1390	hsa_circRNA_104423
1391	hsa_circRNA_103125
1392	hsa_circRNA_100251
1393	hsa_circRNA_103269
1394	hsa_circRNA_100891
1395	hsa_circRNA_104595
1396	hsa_circRNA_103561
1397	hsa_circRNA_100159
1398	hsa_circRNA_100674
1399	hsa_circRNA_102235
1400	hsa_circRNA_103773
1401	hsa_circRNA_100375
1402	hsa_circRNA_102049
1403	hsa_circRNA_103468
1404	hsa_circRNA_102205
1405	hsa_circRNA_100587
1406	hsa_circRNA_104715
1407	hsa_circRNA_000094
1408	hsa_circRNA_103105
1409	hsa_circRNA_104251
1410	hsa_circRNA_101816
1411	hsa_circRNA_400073
1412	hsa_circRNA_001547
1413	hsa_circRNA_100601
1414	hsa_circRNA_100080
1415	hsa_circRNA_102904
1416	hsa_circRNA_104221
1417	hsa_circRNA_100404
1418	hsa_circRNA_102192
1419	hsa_circRNA_101215
1420	hsa_circRNA_103363
1421	hsa_circRNA_103481
1422	hsa_circRNA_104794
1423	hsa_circRNA_104412
1424	hsa_circRNA_103114
1425	hsa_circRNA_102300
1426	hsa_circRNA_102686
1427	hsa_circRNA_103200
1428	hsa_circRNA_102870
1429	hsa_circRNA_104549
1430	hsa_circRNA_100054
1431	hsa_circRNA_103393
1432	hsa_circRNA_101748
1433	hsa_circRNA_101586
1434	hsa_circRNA_103332
1435	hsa_circRNA_103482
1436	hsa_circRNA_100507
1437	hsa_circRNA_101603
1438	hsa_circRNA_103258
1439	hsa_circRNA_102091
1440	hsa_circRNA_100183
1441	hsa_circRNA_103918
1442	hsa_circRNA_104760
1443	hsa_circRNA_102360
1444	hsa_circRNA_100508
1445	hsa_circRNA_101136
1446	hsa_circRNA_000554
1447	hsa_circRNA_101367
1448	hsa_circRNA_000645
1449	hsa_circRNA_100529
1450	hsa_circRNA_102881
1451	hsa_circRNA_001143
1452	hsa_circRNA_101520
1453	hsa_circRNA_100874
1454	hsa_circRNA_103026
1455	hsa_circRNA_000031
1456	hsa_circRNA_102701
1457	hsa_circRNA_400097
1458	hsa_circRNA_101354
1459	hsa_circRNA_102631
1460	hsa_circRNA_102030
1461	hsa_circRNA_103730
1462	hsa_circRNA_101976
1463	hsa_circRNA_101633
1464	hsa_circRNA_100562
1465	hsa_circRNA_103076
1466	hsa_circRNA_102890
1467	hsa_circRNA_100613
1468	hsa_circRNA_102301
1469	hsa_circRNA_100821
1470	hsa_circRNA_104086
1471	hsa_circRNA_104471
1472	hsa_circRNA_100919
1473	hsa_circRNA_400040
1474	hsa_circRNA_100039
1475	hsa_circRNA_103317
1476	hsa_circRNA_101715
1477	hsa_circRNA_100427
1478	hsa_circRNA_101419
1479	hsa_circRNA_001046
1480	hsa_circRNA_103955
1481	hsa_circRNA_100830
1482	hsa_circRNA_100906
1483	hsa_circRNA_104242
1484	hsa_circRNA_103473
1485	hsa_circRNA_101223
1486	hsa_circRNA_100640
1487	hsa_circRNA_101110
1488	hsa_circRNA_101919
1489	hsa_circRNA_104885
1490	hsa_circRNA_101002
1491	hsa_circRNA_102770
1492	hsa_circRNA_103398
1493	hsa_circRNA_103633
1494	hsa_circRNA_103596
1495	hsa_circRNA_101014
1496	hsa_circRNA_103905
1497	hsa_circRNA_103138
1498	hsa_circRNA_102320
1499	hsa_circRNA_102919
1500	hsa_circRNA_102359
1501	hsa_circRNA_100021
1502	hsa_circRNA_102290
1503	hsa_circRNA_100855
1504	hsa_circRNA_102796
1505	hsa_circRNA_000212
1506	hsa_circRNA_103379
1507	hsa_circRNA_103679
1508	hsa_circRNA_102839
1509	hsa_circRNA_101174
1510	hsa_circRNA_104282
1511	hsa_circRNA_100566
1512	hsa_circRNA_103352
1513	hsa_circRNA_100790
1514	hsa_circRNA_000963
1515	hsa_circRNA_104601
1516	hsa_circRNA_100912
1517	hsa_circRNA_103705
1518	hsa_circRNA_104433
1519	hsa_circRNA_101346
1520	hsa_circRNA_102038
1521	hsa_circRNA_104321
1522	hsa_circRNA_103804
1523	hsa_circRNA_100712
1524	hsa_circRNA_102179
1525	hsa_circRNA_103890
1526	hsa_circRNA_100739
1527	hsa_circRNA_400028
1528	hsa_circRNA_103604
1529	hsa_circRNA_100169
1530	hsa_circRNA_104598
1531	hsa_circRNA_104924
1532	hsa_circRNA_100420
1533	hsa_circRNA_102624
1534	hsa_circRNA_100226
1535	hsa_circRNA_102705
1536	hsa_circRNA_100904
1537	hsa_circRNA_103683
1538	hsa_circRNA_101231
1539	hsa_circRNA_400005
1540	hsa_circRNA_102485
1541	hsa_circRNA_100849
1542	hsa_circRNA_104506
1543	hsa_circRNA_102111
1544	hsa_circRNA_103162
1545	hsa_circRNA_100370
1546	hsa_circRNA_102313
1547	hsa_circRNA_101090
1548	hsa_circRNA_100624
1549	hsa_circRNA_102533
1550	hsa_circRNA_101247
1551	hsa_circRNA_400065
1552	hsa_circRNA_101541
1553	hsa_circRNA_103478
1554	hsa_circRNA_102343
1555	hsa_circRNA_100492
1556	hsa_circRNA_104305
1557	hsa_circRNA_104108
1558	hsa_circRNA_102740
1559	hsa_circRNA_104005
1560	hsa_circRNA_104585
1561	hsa_circRNA_101214
1562	hsa_circRNA_000200
1563	hsa_circRNA_101749
1564	hsa_circRNA_102237
1565	hsa_circRNA_102093
1566	hsa_circRNA_104270
1567	hsa_circRNA_001108
1568	hsa_circRNA_102683
1569	hsa_circRNA_104359
1570	hsa_circRNA_102583
1571	hsa_circRNA_102383
1572	hsa_circRNA_103988
1573	hsa_circRNA_103360
1574	hsa_circRNA_100272
1575	hsa_circRNA_101604
1576	hsa_circRNA_102528
1577	hsa_circRNA_103053
1578	hsa_circRNA_102101
1579	hsa_circRNA_105017
1580	hsa_circRNA_101737
1581	hsa_circRNA_101275
1582	hsa_circRNA_103828
1583	hsa_circRNA_103334
1584	hsa_circRNA_105023
1585	hsa_circRNA_100738
1586	hsa_circRNA_101642
1587	hsa_circRNA_103939
1588	hsa_circRNA_103385
1589	hsa_circRNA_103342
1590	hsa_circRNA_104752
1591	hsa_circRNA_101590
1592	hsa_circRNA_001430
1593	hsa_circRNA_100525
1594	hsa_circRNA_102988
1595	hsa_circRNA_101756
1596	hsa_circRNA_101578
1597	hsa_circRNA_001100
1598	hsa_circRNA_104625
1599	hsa_circRNA_101575
1600	hsa_circRNA_102551
1601	hsa_circRNA_101491
1602	hsa_circRNA_100123
1603	hsa_circRNA_100186
1604	hsa_circRNA_101258
1605	hsa_circRNA_100541
1606	hsa_circRNA_103910
1607	hsa_circRNA_100075
1608	hsa_circRNA_100106
1609	hsa_circRNA_103825
1610	hsa_circRNA_104976
1611	hsa_circRNA_103983
1612	hsa_circRNA_101944
1613	hsa_circRNA_104032
1614	hsa_circRNA_101678
1615	hsa_circRNA_101557
1616	hsa_circRNA_104007
1617	hsa_circRNA_400045
1618	hsa_circRNA_101683
1619	hsa_circRNA_103600
1620	hsa_circRNA_100305
1621	hsa_circRNA_101865
1622	hsa_circRNA_101689
1623	hsa_circRNA_103416
1624	hsa_circRNA_102352
1625	hsa_circRNA_103748
1626	hsa_circRNA_100741
1627	hsa_circRNA_100253
1628	hsa_circRNA_100950
1629	hsa_circRNA_103216
1630	hsa_circRNA_103725
1631	hsa_circRNA_100028
1632	hsa_circRNA_100255
1633	hsa_circRNA_101595
1634	hsa_circRNA_104975
1635	hsa_circRNA_103902
1636	hsa_circRNA_105052
1637	hsa_circRNA_102167
1638	hsa_circRNA_102128
1639	hsa_circRNA_102580
1640	hsa_circRNA_104769
1641	hsa_circRNA_101445
1642	hsa_circRNA_100323
1643	hsa_circRNA_102330
1644	hsa_circRNA_001820
1645	hsa_circRNA_100734
1646	hsa_circRNA_104854
1647	hsa_circRNA_100129
1648	hsa_circRNA_100641
1649	hsa_circRNA_102896
1650	hsa_circRNA_103255
1651	hsa_circRNA_102087
1652	hsa_circRNA_102879
1653	hsa_circRNA_104271
1654	hsa_circRNA_104299
1655	hsa_circRNA_000010
1656	hsa_circRNA_101450
1657	hsa_circRNA_104308
1658	hsa_circRNA_102345
1659	hsa_circRNA_102929
1660	hsa_circRNA_102687
1661	hsa_circRNA_101371
1662	hsa_circRNA_102335
1663	hsa_circRNA_101418
1664	hsa_circRNA_001401
1665	hsa_circRNA_103927
1666	hsa_circRNA_000621
1667	hsa_circRNA_100229
1668	hsa_circRNA_104441
1669	hsa_circRNA_103345
1670	hsa_circRNA_400092
1671	hsa_circRNA_100612
1672	hsa_circRNA_101725
1673	hsa_circRNA_100339
1674	hsa_circRNA_100280
1675	hsa_circRNA_000926
1676	hsa_circRNA_102924
1677	hsa_circRNA_104798
1678	hsa_circRNA_101366
1679	hsa_circRNA_101875
1680	hsa_circRNA_103783
1681	hsa_circRNA_104741
1682	hsa_circRNA_101971
1683	hsa_circRNA_400076
1684	hsa_circRNA_105024
1685	hsa_circRNA_104398
1686	hsa_circRNA_104849
1687	hsa_circRNA_100944
1688	hsa_circRNA_100389
1689	hsa_circRNA_100139
1690	hsa_circRNA_101516
1691	hsa_circRNA_100678
1692	hsa_circRNA_104593
1693	hsa_circRNA_102373
1694	hsa_circRNA_100079
1695	hsa_circRNA_100832
1696	hsa_circRNA_001498
1697	hsa_circRNA_101867
1698	hsa_circRNA_001259
1699	hsa_circRNA_102763
1700	hsa_circRNA_000941
1701	hsa_circRNA_400070
1702	hsa_circRNA_102804
1703	hsa_circRNA_104753
1704	hsa_circRNA_000598
1705	hsa_circRNA_102673
1706	hsa_circRNA_101877
1707	hsa_circRNA_104393
1708	hsa_circRNA_100172
1709	hsa_circRNA_100356
1710	hsa_circRNA_103778
1711	hsa_circRNA_100845
1712	hsa_circRNA_100684
1713	hsa_circRNA_102451
1714	hsa_circRNA_102641
1715	hsa_circRNA_103136
1716	hsa_circRNA_104995
1717	hsa_circRNA_001915
1718	hsa_circRNA_100878
1719	hsa_circRNA_103002
1720	hsa_circRNA_105053
1721	hsa_circRNA_101139
1722	hsa_circRNA_104232
1723	hsa_circRNA_102486
1724	hsa_circRNA_104139
1725	hsa_circRNA_102243
1726	hsa_circRNA_103426
1727	hsa_circRNA_101874
1728	hsa_circRNA_102574
1729	hsa_circRNA_100112
1730	hsa_circRNA_100031
1731	hsa_circRNA_103410
1732	hsa_circRNA_101849
1733	hsa_circRNA_102380
1734	hsa_circRNA_102013
1735	hsa_circRNA_100103
1736	hsa_circRNA_100964
1737	hsa_circRNA_104150
1738	hsa_circRNA_100829
1739	hsa_circRNA_102952
1740	hsa_circRNA_102902
1741	hsa_circRNA_100069
1742	hsa_circRNA_104729
1743	hsa_circRNA_102427
1744	hsa_circRNA_101885
1745	hsa_circRNA_103757
1746	hsa_circRNA_100262
1747	hsa_circRNA_104877
1748	hsa_circRNA_102581
1749	hsa_circRNA_102874
1750	hsa_circRNA_101888
1751	hsa_circRNA_400102
1752	hsa_circRNA_105009
1753	hsa_circRNA_101396
1754	hsa_circRNA_000178
1755	hsa_circRNA_104090
1756	hsa_circRNA_000671
1757	hsa_circRNA_001408
1758	hsa_circRNA_104743
1759	hsa_circRNA_102850
1760	hsa_circRNA_000662
1761	hsa_circRNA_102827
1762	hsa_circRNA_103564
1763	hsa_circRNA_101584
1764	hsa_circRNA_100353
1765	hsa_circRNA_103602
1766	hsa_circRNA_400048
1767	hsa_circRNA_103494
1768	hsa_circRNA_104255
1769	hsa_circRNA_101286
1770	hsa_circRNA_104641
1771	hsa_circRNA_100809
1772	hsa_circRNA_000629
1773	hsa_circRNA_100001
1774	hsa_circRNA_103801
1775	hsa_circRNA_001073
1776	hsa_circRNA_102110
1777	hsa_circRNA_101336
1778	hsa_circRNA_101334
1779	hsa_circRNA_101144
1780	hsa_circRNA_102767
1781	hsa_circRNA_001724
1782	hsa_circRNA_100421
1783	hsa_circRNA_100805
1784	hsa_circRNA_104828
1785	hsa_circRNA_101040
1786	hsa_circRNA_100742
1787	hsa_circRNA_101370
1788	hsa_circRNA_104134
1789	hsa_circRNA_102494
1790	hsa_circRNA_001350
1791	hsa_circRNA_101742
1792	hsa_circRNA_102917
1793	hsa_circRNA_001153
1794	hsa_circRNA_103062
1795	hsa_circRNA_102381
1796	hsa_circRNA_100177
1797	hsa_circRNA_100045
1798	hsa_circRNA_102441
1799	hsa_circRNA_104117
1800	hsa_circRNA_101722
1801	hsa_circRNA_104176
1802	hsa_circRNA_001205
1803	hsa_circRNA_100450
1804	hsa_circRNA_103941
1805	hsa_circRNA_104947
1806	hsa_circRNA_101350
1807	hsa_circRNA_103595
1808	hsa_circRNA_104457
1809	hsa_circRNA_102209
1810	hsa_circRNA_100334
1811	hsa_circRNA_100411
1812	hsa_circRNA_101788
1813	hsa_circRNA_103018
1814	hsa_circRNA_104543
1815	hsa_circRNA_103742
1816	hsa_circRNA_104746
1817	hsa_circRNA_103081
1818	hsa_circRNA_101535
1819	hsa_circRNA_103937
1820	hsa_circRNA_104425
1821	hsa_circRNA_000294
1822	hsa_circRNA_102765
1823	hsa_circRNA_400023
1824	hsa_circRNA_100818
1825	hsa_circRNA_101303
1826	hsa_circRNA_101320
1827	hsa_circRNA_100416
1828	hsa_circRNA_104035
1829	hsa_circRNA_104094
1830	hsa_circRNA_103240
1831	hsa_circRNA_100090
1832	hsa_circRNA_103885
1833	hsa_circRNA_103056
1834	hsa_circRNA_400103
1835	hsa_circRNA_102547
1836	hsa_circRNA_101058
1837	hsa_circRNA_104489
1838	hsa_circRNA_101467
1839	hsa_circRNA_100238
1840	hsa_circRNA_102630
1841	hsa_circRNA_100070
1842	hsa_circRNA_104135
1843	hsa_circRNA_102160
1844	hsa_circRNA_102824
1845	hsa_circRNA_100390
1846	hsa_circRNA_103339
1847	hsa_circRNA_400075
1848	hsa_circRNA_100675
1849	hsa_circRNA_101672
1850	hsa_circRNA_100685
1851	hsa_circRNA_100184
1852	hsa_circRNA_102154
1853	hsa_circRNA_103670
1854	hsa_circRNA_102601
1855	hsa_circRNA_101721
1856	hsa_circRNA_102545
1857	hsa_circRNA_102928
1858	hsa_circRNA_102520
1859	hsa_circRNA_100827
1860	hsa_circRNA_102452
1861	hsa_circRNA_100823
1862	hsa_circRNA_100647
1863	hsa_circRNA_103066
1864	hsa_circRNA_101542
1865	hsa_circRNA_100011
1866	hsa_circRNA_100510
1867	hsa_circRNA_102990
1868	hsa_circRNA_104148
1869	hsa_circRNA_103120
1870	hsa_circRNA_100579
1871	hsa_circRNA_101329
1872	hsa_circRNA_103387
1873	hsa_circRNA_101267
1874	hsa_circRNA_103441
1875	hsa_circRNA_103362
1876	hsa_circRNA_100549
1877	hsa_circRNA_001039
1878	hsa_circRNA_102954
1879	hsa_circRNA_102210
1880	hsa_circRNA_103562
1881	hsa_circRNA_103285
1882	hsa_circRNA_002010
1883	hsa_circRNA_103171
1884	hsa_circRNA_102137
1885	hsa_circRNA_103391
1886	hsa_circRNA_103676
1887	hsa_circRNA_104003
1888	hsa_circRNA_103273
1889	hsa_circRNA_101992
1890	hsa_circRNA_104759
1891	hsa_circRNA_103329
1892	hsa_circRNA_103541
1893	hsa_circRNA_100391
1894	hsa_circRNA_100476
1895	hsa_circRNA_104267
1896	hsa_circRNA_101952
1897	hsa_circRNA_104997
1898	hsa_circRNA_102100
1899	hsa_circRNA_101369
1900	hsa_circRNA_102113
1901	hsa_circRNA_101184
1902	hsa_circRNA_102355
1903	hsa_circRNA_102781
1904	hsa_circRNA_100120
1905	hsa_circRNA_102707
1906	hsa_circRNA_103043
1907	hsa_circRNA_103292
1908	hsa_circRNA_104429
1909	hsa_circRNA_102639
1910	hsa_circRNA_101053
1911	hsa_circRNA_102812
1912	hsa_circRNA_100894
1913	hsa_circRNA_101159
1914	hsa_circRNA_102984
1915	hsa_circRNA_100108
1916	hsa_circRNA_001486
1917	hsa_circRNA_103413
1918	hsa_circRNA_101381
1919	hsa_circRNA_100469
1920	hsa_circRNA_102061
1921	hsa_circRNA_105021
1922	hsa_circRNA_104382
1923	hsa_circRNA_103558
1924	hsa_circRNA_000855
1925	hsa_circRNA_104916
1926	hsa_circRNA_103299
1927	hsa_circRNA_101057
1928	hsa_circRNA_400034
1929	hsa_circRNA_103083
1930	hsa_circRNA_104801
1931	hsa_circRNA_104642
1932	hsa_circRNA_400057
1933	hsa_circRNA_100999
1934	hsa_circRNA_101429
1935	hsa_circRNA_100635
1936	hsa_circRNA_104209
1937	hsa_circRNA_103854
1938	hsa_circRNA_100091
1939	hsa_circRNA_103271
1940	hsa_circRNA_101658
1941	hsa_circRNA_002086
1942	hsa_circRNA_100403
1943	hsa_circRNA_104928
1944	hsa_circRNA_102916
1945	hsa_circRNA_100585
1946	hsa_circRNA_102734
1947	hsa_circRNA_102810
1948	hsa_circRNA_101975
1949	hsa_circRNA_100984
1950	hsa_circRNA_104061
1951	hsa_circRNA_102218
1952	hsa_circRNA_100008
1953	hsa_circRNA_104577
1954	hsa_circRNA_100835
1955	hsa_circRNA_102334
1956	hsa_circRNA_104831
1957	hsa_circRNA_103644
1958	hsa_circRNA_101308
1959	hsa_circRNA_104395
1960	hsa_circRNA_104710
1961	hsa_circRNA_100657
1962	hsa_circRNA_104610
1963	hsa_circRNA_104756
1964	hsa_circRNA_104469
1965	hsa_circRNA_102875
1966	hsa_circRNA_104252
1967	hsa_circRNA_104567
1968	hsa_circRNA_000956
1969	hsa_circRNA_100447
1970	hsa_circRNA_102762
1971	hsa_circRNA_104551
1972	hsa_circRNA_101697
1973	hsa_circRNA_100273
1974	hsa_circRNA_102570
1975	hsa_circRNA_105027
1976	hsa_circRNA_102550
1977	hsa_circRNA_100115
1978	hsa_circRNA_000508
1979	hsa_circRNA_100035
1980	hsa_circRNA_104036
1981	hsa_circRNA_100873
1982	hsa_circRNA_100175
1983	hsa_circRNA_103810
1984	hsa_circRNA_103153
1985	hsa_circRNA_103383
1986	hsa_circRNA_102362
1987	hsa_circRNA_101758
1988	hsa_circRNA_104618
1989	hsa_circRNA_103380
1990	hsa_circRNA_102560
1991	hsa_circRNA_101895
1992	hsa_circRNA_101866
1993	hsa_circRNA_102591
1994	hsa_circRNA_101796
1995	hsa_circRNA_100009
1996	hsa_circRNA_103920
1997	hsa_circRNA_103838
1998	hsa_circRNA_103546
[truncated: 436 more rows]

## Sheet: Table S2.4
Table S2.4 Details of circRNAs with dysregulated expression in our microarray
probeID	P-value	FDR	FC (abs)	Regulation	circRNA	Alias*	source	circRNA_type
ASCRP3004255	0.0350709	0.476351	3.49492	up	hsa_circRNA_102039	hsa_circ_0043138	circBase	sense overlapping
ASCRP3002022	0.000587155	0.336516	2.2146	up	hsa_circRNA_102110	hsa_circ_0044301	circBase	exonic
ASCRP3001816	0.0475635	0.478248	2.0215	down	hsa_circRNA_101947	hsa_circ_0041481	circBase	exonic
ASCRP3012990	0.0478138	0.478248	2.72015	down	hsa_circRNA_101001	hsa_circ_0025135	circBase	exonic
*Alias: the circRNA ID in circBase (http://www.circbase.org/) or other literatures.
