# Supplementary material for: Hsa_circ_0044301 Regulates Gastric Cancer Cell’s Proliferation, Migration, and Invasion by Modulating the Hsa-miR-188-5p/DAXX Axis and MAPK Pathway
Source: Cancers (Basel). 2022 Aug 29;14(17):4183. doi: 10.3390/cancers14174183 (PMC9454757; doi:10.3390/cancers14174183)
Supplement: Supplementary file 1 [file cancers-14-04183-s001.zip › Supplementary Table S3.xls]

## Sheet: Table S3.1
			Table S3.1 CircRNA-0044301 expression and patients' clinicopathological characteristics in our study
Number	Gender	Age	TNM	Tumor size (cm)	History of hypertension	Family history	Blood type	CircRNA-0044301 relative expression ( 2-ΔΔCT)
1	female	69	T3N3aM0	6	yes	yes	B	0.0895838
4	male	72	T3N3aM0	8	yes	no	O	2.43229
7	male	58	T3N0M0	4	yes	no	O	1.022
8	female	38	T3N3aM0	3.5	no	no	O	0.201141
9	male	76						1.24204
11	female	66	T3N3bM0	10	yes		O	0.423513
12	female	77	T3N3aM0	10	yes	no	A	0.443272
13	female	63	T3N0M0	6	yes	no	AB	4.62223
14	female	60	T3N1M0	6	no	no	A	0.668557
15	female	74	T2N1M0	2	no		A	2.50579
16	male	67	T3N3bM0	7.5	no	no	B	2.87914
17	female	64	T3N0M0	6	no	no	B	1.08131
18	male	72	T3N1M0	8			A	0.195267
20	female	87	T3N2M0	4	no	no	O	1.15477
21	female	52	T3N2M0	2.8			O	0.879247
22	male	74	T1N0M0	0.9	no	no		0.787346
23	male	74	t1n0m0	2	no	no	A	2.41507
24	male	76	T3N1M0	2.5			O	0.319899
25	male	47	T3N0M0	1.8	no	no	A	0.891306
26	female	66	T3N0M0	5.2	yes	no	A	1.22463
30	male	72	T3N3bM0	8	no	no	B	1.03048
31	male	70	T3N3bM0	7.5	yes		A	3.04106
35	male	62	T3N2M0	3.5	yes		O	0.332166
37	male	72	T3N2M0		yes		O	1.23065
39	female	63	T3N0M0	2.7	yes	no	O	1.34984
40	*							1.2058
42	female	51	T3N3aM0	5	no	yes	O	1.48664
43	male	59	T3N1M0	3.5	no	no	AB	0.28116
44	female	80	T3N2M0	6.5	no	no	O	2.62914
45								3.8459
47	female	60	T3N2M0	2	no	yes	O	0.492719
48	male	76	T2N1M0	3	yes	no	A	0.883249
54	male	61		3.5	no	no	A	0.891673
55	male	86	T3N0M0	4	no	no	B	7.39627
56	male	78	T3N3bM0	12	no	no	O	0.63549
59	male	58	T2N0M0	7	yes	no	A	0.226564
60	male	78	T3N0M0	5.5	no		A	0.932914
61	male	45	T1N1M0	3	no	no	A	0.0127366
63	female	74	T3N3aM1	5			B	1.90011
65	female	88	T3N3bM0	2	yes	no	B	1.84333
66	male	67	T3N0M0	6	no	no	O	9.81787
68	female	74	T4bN0M0	6.5	yes	no	AB	4.08866
69	male	70	T3N2M0	2	no	no	B	0.84434
71	male	75	T3N2M0	3	no	no	O	2.19836
73	male	64	T1N0M0	2.5	no	no	AB	0.399122
74	male	84	T4bN2MI	11	yes	no	A	0.450788
75	male	87	T3N0M0	5.5	yes	no	A	1.4244
76	male	58	T3N3bM0	4	yes	no	O	1.68477
79	female	61	T4bN3bM0	4.5	no	no		2.17295
80	male	70	T3N1M0	3	yes	no	A	0.595204
81	male	73	T3N0M0	7	no	no	A	1.10311
82	male	52	T4bN2M0	6	no	no	O	0.481778
83	male	74	T3N0M0	4	yes	no	B	0.133322
87	male	73	T3N2M0	3.5	yes	no	O	3.06454
88	male	74	T3N1M0	4	yes	no	B	0.101088
91	male	78	T3N2M0	7	yes	no		3.04403
92	male	57	T3N1M0	5	no	no	O	0.21124
94	male	60	T3N1M0	3	no	no		3.06905
95	male	51	T4aN3bM1	7	no	no	A	2.60739
96	female	74	T4aN1M0	2.2	yes	no	O	1.32104
102	male	76	T3N0M0	5	no	no	O	2.89618
* Spaces in the table indicate that the field information is missing.

## Sheet: Table S3.2
		Table S3.2 Basic information and relative expression results of circRNA-0044301 were obtained from 45 patients with survival time and survival status
id	futime(month)	fustat(0=alive,1=death)	age(1= <=65,2= >65)	gender(1=male; 2=female,)	stage(1=stageI,2=stageII,3=stageIII)	tumor size(1=<=4.5cm; 2=>4.5cm)	circRNA-0044301(relative expression, 2^-ΔΔCT)
1	4	0	2	2	3	2	0.0895838
4	12	1	2	1	3	2	2.43229
7	4	1	1	1	2	1	1.022
8	68	0	1	2	3	1	0.201141
11	10	0	2	2	3	2	0.423513
12	4	1	2	2	3	2	0.443272
13	17	1	1	2	2	2	4.62223
14	68	0	1	2	2	2	0.668557
16	7	1	2	1	3	2	2.87914
17	68	0	1	2	2	2	1.08131
21	79	0	1	2	3	1	0.879247
22	78	0	2	1	1	1	0.787346
23	69	0	2	1	1	1	2.41507
25	4	0	1	1	2	1	0.891306
26	28	1	2	2	2	2	1.22463
30	49	1	2	1	3	2	1.03048
31	7	1	2	1	3	2	3.04106
35	78	0	1	1	3	1	0.332166
37*	7	1	72	1	3		1.23065
39	78	0	1	2	2	1	1.34984
42	28	1	1	2	3	2	1.48664
43	1	0	1	1	2	1	0.28116
44	6	1	2	2	3	2	2.62914
54	65	0	1	1	2	1	0.891673
56	1	0	2	1	3	2	0.63549
60	10	1	2	1	2	2	0.932914
61	63	0	1	1	1	1	0.0127366
63	5	1	2	2	4	2	1.90011
65	8	1	2	2	3	1	1.84333
66	5	0	2	1	2	2	9.81787
68	34	1	2	2	3	2	4.08866
69	22	1	2	1	3	1	0.84434
71	12	1	2	1	3	1	2.19836
73	63	0	1	1	1	1	0.399122
75	0.25	1	2	1	2	2	1.4244
80	11	1	2	1	2	1	0.595204
81	18	1	2	1	2	2	1.10311
82	11	1	1	1	3	2	0.481778
83	38	1	2	1	2	1	0.133322
87	12	1	2	1	3	1	3.06454
88	61	0	2	1	2	1	0.101088
91	6	1	2	1	3	2	3.04403
92	60	0	1	1	2	2	0.21124
94	30	1	1	1	2	1	3.06905
95	26	1	1	1	4	2	2.60739
*The tumor size of this patient was not found in the case
