# Supplementary material for: Hsa_circ_0044301 Regulates Gastric Cancer Cell’s Proliferation, Migration, and Invasion by Modulating the Hsa-miR-188-5p/DAXX Axis and MAPK Pathway
Source: Cancers (Basel). 2022 Aug 29;14(17):4183. doi: 10.3390/cancers14174183 (PMC9454757; doi:10.3390/cancers14174183)
Supplement: Supplementary file 1 [file cancers-14-04183-s001.zip › Supplementary Table S4.xls]

## Sheet: S4.1
Table S4.1 The hsa_miRNA expression data of all patients in TCGA-STAD
miRNA_ID	TCGA-3M-AB46-01A	TCGA-3M-AB47-01A	TCGA-B7-5816-01A	TCGA-B7-5818-01A	TCGA-B7-A5TI-01A	TCGA-B7-A5TJ-01A	TCGA-B7-A5TK-01A	TCGA-B7-A5TN-01A	TCGA-BR-4183-01A	TCGA-BR-4184-01A	TCGA-BR-4187-01A	TCGA-BR-4188-01A	TCGA-BR-4191-01A	TCGA-BR-4201-01A	TCGA-BR-4253-01A	TCGA-BR-4255-01A	TCGA-BR-4256-01A	TCGA-BR-4257-01A	TCGA-BR-4267-01A	TCGA-BR-4279-01A	TCGA-BR-4280-01A	TCGA-BR-4292-01A	TCGA-BR-4294-01A	TCGA-BR-4357-01A	TCGA-BR-4361-01A	TCGA-BR-4362-01A	TCGA-BR-4363-01A	TCGA-BR-4366-01A	TCGA-BR-4367-01A	TCGA-BR-4368-01A	TCGA-BR-4369-01A	TCGA-BR-4370-01A	TCGA-BR-4371-01A	TCGA-BR-6452-01A	TCGA-BR-6453-01A	TCGA-BR-6453-11A	TCGA-BR-6454-01A	TCGA-BR-6454-11A	TCGA-BR-6455-01A	TCGA-BR-6456-01A	TCGA-BR-6457-01A	TCGA-BR-6457-11A	TCGA-BR-6458-01A	TCGA-BR-6458-11A	TCGA-BR-6563-01A	TCGA-BR-6564-01A	TCGA-BR-6564-11A	TCGA-BR-6565-01A	TCGA-BR-6566-01A
hsa-let-7a-1	13.4053	13.1245	13.1014	12.4601	12.8863	12.2642	12.54	12.0475	11.6616	11.7305	11.6842	11.9929	11.8137	12.0159	11.8043	11.7313	11.7102	11.7048	11.7205	11.9662	11.2888	12.4909	10.7491	11.4515	11.415	11.8262	12.2789	12.1329	12.2545	11.5598	11.5106	11.2594	11.5995	13.2763	12.8275	12.1918	12.6746	11.943	12.9174	12.3901	12.0157	12.3618	12.9217	12.1672	13.3725	12.7658	12.1739	12.2777	12.6037
hsa-let-7a-2	13.416	13.1018	13.0964	12.4688	12.8983	12.2524	12.5193	12.0617	11.6751	11.6967	11.6479	12.0065	11.8022	12.0018	11.8253	11.7307	11.719	11.7301	11.7529	11.9679	11.3159	12.4711	10.7014	11.425	11.4597	11.8603	12.2651	12.1302	12.2277	11.5411	11.5019	11.3355	11.5756	13.2622	12.8032	12.196	12.6613	11.9316	12.9247	12.3813	11.9989	12.3668	12.9376	12.1525	13.3887	12.7676	12.1695	12.2755	12.5903
hsa-let-7a-3	13.4214	13.1209	13.109	12.4645	12.9078	12.2818	12.5245	12.0763	11.6394	11.6998	11.6852	12.0046	11.7727	12.0078	11.813	11.7538	11.7068	11.7191	11.7364	11.9822	11.3308	12.481	10.7576	11.4936	11.4726	11.8608	12.306	12.1298	12.2826	11.5695	11.5015	11.2958	11.6319	13.2806	12.8312	12.1978	12.6759	11.9543	12.932	12.3865	12.0207	12.3707	12.9277	12.171	13.3785	12.7797	12.1752	12.2705	12.5997
hsa-let-7b	14.5385	12.9679	14.2637	13.0476	12.4262	12.3666	12.4385	13.1419	13.0917	13.4271	13.1593	12.9324	12.7149	13.6362	12.7016	13.5281	13.2706	13.3856	12.3908	13.4749	12.3388	13.6549	11.2867	12.9461	13.1041	13.1015	13.94	14.4617	14.2057	12.8862	12.6887	12.9022	13.1308	14.0653	13.1439	12.6435	13.9837	12.7971	13.2409	12.7249	12.7284	12.9924	13.0894	12.8169	12.8139	12.6057	12.8724	12.9784	13.1856
hsa-let-7c	11.168	11.9328	10.1732	7.92994	10.8655	10.2383	9.58806	10.59	11.0765	9.73849	11.4718	11.2319	9.39546	9.95846	8.19478	11.6618	10.4767	8.43317	7.92398	11.4783	6.93617	7.72698	9.05528	8.74789	9.847	8.91583	10.3735	9.00813	10.8064	9.69717	10.585	9.49421	7.77055	9.09481	12.661	9.97945	10.6184	10.1593	10.6512	10.628	11.1927	9.81836	10.6347	7.96426	12.6216	11.8018	10.8238	10.4871	9.42624
hsa-let-7d	10.1782	8.79075	10.4993	10.3451	8.63299	8.70736	8.37322	8.98884	9.80611	9.51889	8.48024	7.88912	10.0626	9.10567	9.58436	9.17141	9.17611	9.84263	9.13461	8.48872	9.17226	10.1697	8.71944	9.61887	9.76971	10.4967	9.87965	9.09495	8.64157	9.42958	8.62346	8.50921	9.94626	10.8305	9.39283	9.36132	9.67295	8.60212	10.1976	9.38262	8.95563	9.49833	10.3283	9.34128	8.13902	8.19116	9.36031	9.5607	10.1718
hsa-let-7e	10.3088	9.49633	10.2373	8.55613	9.16045	9.30022	10.0821	9.17181	9.1032	9.3258	9.13636	8.07747	8.59098	9.0076	8.04547	9.32523	9.22361	9.42769	10.0099	8.69599	7.67032	8.40825	7.31892	9.1003	8.38483	7.97047	9.25269	9.17276	9.08624	9.20985	10.3167	9.51477	7.44858	9.48031	8.99064	9.40162	9.17363	8.6247	9.23096	9.19684	9.25003	9.02485	10.2224	8.35666	10.5567	9.85267	9.30284	9.20871	9.80082
hsa-let-7f-1	12.5353	12.2762	11.6553	11.6435	12.6439	11.3507	12.398	10.6177	10.227	9.882	10.0574	10.4341	10.4795	10.187	10.5889	9.88185	9.89492	9.81822	10.1101	10.2065	9.81425	10.9291	9.83845	10.1644	9.84996	10.3398	10.4532	10.2317	10.277	9.81937	9.20601	9.35592	10.1815	11.7426	12.4264	11.0982	12.1111	11.2454	11.99	11.536	11.0434	11.0937	12.153	11.319	13.2224	12.0172	11.0246	11.3657	11.5652
hsa-let-7f-2	12.5563	12.2956	11.6654	11.655	12.6528	11.3878	12.3999	10.6334	10.2284	9.88978	10.0442	10.4509	10.4849	10.2295	10.5828	9.8364	9.96912	9.8591	10.0893	10.2723	9.90055	10.9395	9.89633	10.0339	9.76596	10.3915	10.4843	10.1898	10.3009	9.82664	9.19883	9.29967	10.1693	11.7469	12.431	11.1064	12.1135	11.2525	11.9921	11.5545	11.027	11.1228	12.1606	11.3539	13.2506	12.0275	11.0271	11.425	11.5866
hsa-let-7g	10.0214	9.22164	9.49633	10.2869	8.81461	8.9435	9.70804	8.76937	8.97378	9.28063	8.05082	8.08827	9.3839	8.93294	9.36842	8.23533	8.80572	9.39331	9.62429	8.24844	9.24674	10.0643	8.96823	9.2817	9.06067	9.44169	9.05551	9.86251	8.45691	9.20479	8.34414	8.34005	9.44662	10.5193	10.0764	9.47047	10.1948	9.19566	10.2088	8.52521	8.68848	10.0719	10.19	10.2854	9.08527	8.60008	9.03306	9.49916	10.3611
hsa-let-7i	9.21198	9.70255	9.7326	9.50752	8.84703	8.506	9.31387	8.67455	9.2563	8.61778	9.26336	8.43748	8.96657	9.4007	9.57076	8.59699	9.19347	8.87568	9.3654	8.49339	8.15454	8.93947	7.68583	8.96862	8.58284	9.1489	9.17237	8.58136	8.57559	8.7787	7.83188	8.63907	8.04769	9.3604	10.4425	8.92726	10.2666	9.31076	9.81513	8.57076	9.00683	9.13732	9.56595	9.24547	8.87312	8.60679	8.83729	9.7177	10.0724
hsa-mir-100	9.65494	12.6485	11.9285	10.6837	11.4026	11.689	11.5464	9.52575	12.645	11.2141	12.9218	12.7998	10.6431	11.6552	10.0539	12.7205	11.8619	9.6493	9.54551	12.631	8.57846	9.66072	8.49651	10.9035	12.511	10.7292	12.102	10.5214	11.7861	12.4857	10.9899	11.3349	8.89264	10.3596	12.8736	12.3784	11.8381	12.4828	12.2444	12.3448	12.9189	11.6714	13.0032	9.63692	12.5603	12.5931	12.7067	12.1025	10.642
hsa-mir-101-1	11.574	11.7881	11.4021	11.7155	11.4152	11.5282	11.0353	10.8308	12.2513	11.6926	11.9716	12.6739	11.8315	11.8026	12.0093	12.0914	11.6966	10.9218	12.8254	11.9923	11.6238	12.3655	14.2751	11.8981	11.8485	11.7663	12.1657	11.7239	12.6593	12.1685	11.9267	11.2384	12.3727	11.3608	12.9146	11.6225	12.3837	13.1317	12.6948	11.9317	12.249	11.7441	12.4088	11.7676	12.2218	11.993	12.1909	12.0607	11.1368
hsa-mir-101-2	11.5584	11.8346	11.4303	11.7237	11.4637	11.5681	11.074	10.8696	12.2639	11.7334	11.9902	12.6912	11.8548	11.804	12.012	12.0929	11.6929	10.929	12.8459	12.0023	11.6431	12.3835	14.2744	11.9382	11.8353	11.7663	12.1792	11.7448	12.6655	12.1632	11.9373	11.2432	12.3744	11.3628	12.9036	11.6617	12.3963	13.1485	12.7031	11.9462	12.2593	11.7393	12.4346	11.7923	12.2697	12.0009	12.2069	12.089	11.1327
hsa-mir-103a-1	13.9829	13.5663	12.342	12.2383	13.74	13.8409	13.0575	13.7123	12.8805	12.7164	12.2101	12.3588	13.292	12.7989	12.9347	12.153	12.2957	13.2268	12.6501	12.6429	12.3925	12.9531	10.4625	12.4645	12.0736	12.6107	12.911	13.2374	12.6959	12.2459	12.6439	11.7397	12.4563	12.8108	13.4217	12.0129	11.9536	11.6667	12.9532	11.9569	11.9164	11.5638	13.0429	11.7037	13.1651	11.9859	11.9287	12.4791	12.2075
hsa-mir-103a-2	13.9902	13.5694	12.336	12.2603	13.7331	13.8474	13.062	13.7076	12.8744	12.7365	12.2077	12.3839	13.2971	12.8086	12.9524	12.172	12.2728	13.2619	12.6426	12.6468	12.3672	12.9484	10.4144	12.437	12.0789	12.6116	12.9259	13.2513	12.7137	12.2424	12.6432	11.7168	12.4591	12.8126	13.4313	12.0297	11.9576	11.6884	12.9574	11.98	11.9052	11.5806	13.0484	11.689	13.1714	11.9884	11.9227	12.4881	12.2097
hsa-mir-103b-1	0	0	0	0	0	0	0	0	0	0	0	0	0	0	0	0	0	0	0	0	0	0	0	0	0	0	0	0	0	0	0	0	0	0	0	0	0	0	0	0	0	0	0	0	0	0	0	0	0
hsa-mir-103b-2	0	0	0	0	0	0	0	0	0	0	0	0	0	0	0	0	0	0	0	0	0	0	0	0	0	0	0	0	0	0	0	0	0	0	0	0	0	0	0	0	0	0	0	0	0	0	0	0	0
hsa-mir-105-1	0.386867	0.746801	0	0.760351	0	1.28273	0	5.89999	0.655751	2.27173	0.459696	0	0.675559	1.24259	0.726588	0.351701	0	0	1.06313	0	0	1.50806	3.05322	6.77591	3.66977	0.770352	0	5.62405	0.920445	1.61955	3.03038	1.39741	0	0	0	0.486129	0	0.221121	0.433392	6.11978	0.410474	0.341756	3.70602	0	0	0	0.365581	5.30961	0.310287
hsa-mir-105-2	0	0.929102	0.286513	0.760351	0.273647	1.38522	0.126884	5.80527	0	1.18672	0.807771	0.367374	0.675559	0	1.20754	0.634248	0.497633	0	0	0.828799	0	0.691319	3.05322	6.70942	2.96513	0	0.885202	5.52489	1.08125	1.41047	2.55797	0.627385	0	0.336305	0	0.263444	0	0.221121	0.433392	6.06141	0.410474	0.341756	3.68114	0.412258	0	0.219784	0	5.33298	0
hsa-mir-106a	4.71255	2.82835	3.47323	5.22612	3.80212	4.68477	2.85636	3.69848	4.71804	5.70192	3.93164	3.14243	4.97535	5.34414	6.69754	3.80478	4.66117	6.66615	6.32167	3.41989	7.01903	7.27895	4.38922	5.87645	6.47797	6.6712	5.85176	5.14551	5.24971	5.7894	7.00123	3.92256	7.07804	3.38552	3.38213	3.13968	4.51615	2.72938	4.50621	1.90973	2.79164	3.37232	2.66806	3.76226	0.848674	2.15567	3.56255	3.58674	3.64591
hsa-mir-106b	10.399	8.86676	9.55776	9.79015	9.5394	9.24847	8.0742	8.92744	8.71198	9.39581	7.74243	7.63083	9.08394	8.94698	9.43679	8.95093	8.37932	9.63318	8.9307	7.84537	9.2676	9.29192	6.49293	10.2197	9.40538	10.6735	9.80101	9.21313	8.34452	9.40509	9.73688	8.46763	9.38032	9.1802	9.63681	8.19227	10.6184	8.15685	9.51628	8.67732	7.84489	7.90989	9.20544	8.65776	7.67959	8.49706	8.59305	9.50131	9.43727
hsa-mir-107	7.0778	6.28258	5.8933	5.63149	6.11037	5.96439	6.19985	5.87074	6.10646	6.33577	5.11988	4.6645	5.82122	6.27629	6.20308	6.04166	5.72516	6.93831	5.96704	5.28666	5.7137	6.67857	3.60813	5.74985	6.70417	7.35145	5.78684	6.56011	5.70341	5.91365	5.36065	4.90074	7.23882	6.05809	6.67067	5.58134	5.98301	5.18771	6.14068	5.536	5.24892	5.17057	6.72633	5.67089	5.60438	4.92476	5.75664	6.01598	5.93613
hsa-mir-10a	16.3975	16.0012	15.287	15.1231	15.334	15.2115	14.3767	15.7369	15.4803	14.2888	14.8454	15.8891	14.4819	14.7914	13.3733	15.6155	13.5749	14.4678	14.5568	15.5961	15.4024	13.7317	11.1153	14.9037	14.6544	14.6271	14.0041	14.4117	14.9085	15.6498	15.2988	13.8252	14.9128	16.3122	14.8548	15.7224	15.7006	15.6479	14.7418	15.5882	15.4804	14.696	15.1775	13.5304	14.7784	15.6439	15.3723	14.9558	14.4449
hsa-mir-10b	13.0761	14.1591	14.8394	13.7451	14.1828	14.4429	12.7482	13.8568	14.5275	13.6523	14.6751	15.2774	14.6983	14.9481	14.9356	13.9437	14.8016	13.7549	13.2286	14.5649	13.9678	14.0025	12.5626	14.693	13.4223	14.375	15.0008	15.1365	14.3653	13.9693	15.5191	13.9653	14.1315	13.9932	15.1217	15.0372	14.5665	14.6452	13.7803	15.1234	14.3907	14.3844	14.072	14.0331	13.1103	14.1224	14.9335	14.4065	13.7162
hsa-mir-1-1	3.26475	4.05273	3.04435	2.26797	2.63726	5.58825	5.98112	3.43104	5.34714	3.40225	7.87056	6.34573	2.19638	4.06278	1.56762	7.69502	6.9703	2.08535	1.39736	6.68205	2.32823	3.06645	2.87326	2.98367	4.47141	0.770352	2.79268	2.91679	2.90151	5.85286	4.38413	4.57773	0.59822	3.27249	4.06266	6.7759	2.85301	7.72582	6.03672	6.44899	6.83356	6.37144	4.18452	4.47048	5.11418	7.70454	7.35835	7.09188	4.01052
hsa-mir-1178	0	0	0	0	0	0	0	0	0	0	0	0	0	0	0	0	0	0	0	0	0	0	0	0	0	0	0	0	0	0	0	0	0	0	0	0	0	0	0	0	0	0	0	0	0	0	0	0	0
hsa-mir-1179	0.386867	0	0	0	0.273647	0	0.338005	0	0	0	0.459696	0	0	0	0	0.870418	0	0	0	0	0	0	0	0	0.462865	0	0	0	0.290631	0	0.983867	0	0	0.336305	0.41223	0.486129	0	0	0.433392	0	0.219786	0	0	0.412258	0	0.497126	0.783247	0.282115	0
hsa-mir-1180	3.92099	2.13433	5.06669	3.37402	3.09068	2.82583	2.38453	3.06852	3.70975	3.71427	2.46023	1.96349	2.67241	3.20122	2.78502	2.98214	2.75842	3.80479	3.63684	2.16766	1.77109	3.26403	0.980694	4.44161	2.8935	3.91779	4.02205	2.46054	1.3574	2.57887	4.42847	2.42172	3.03455	4.75432	3.28757	3.48766	5.18092	2.96184	3.78553	2.49274	3.1267	3.47992	3.68114	3.95919	2.07155	2.42245	3.90568	3.20275	2.75679
hsa-mir-1181	0	0	1.21296	0.760351	0	0	0	0.262681	0	0	0.459696	0	0	0	0	0.351701	0	0	0	0	0	0.691319	0.572121	0	0.462865	0	0	0	0	0.500352	0	0	1.34571	0.608844	0.869361	0.263444	0.647008	0	0.433392	0.756464	0.219786	0.617859	0	0	0.485863	0	0.194339	0.720654	0.565507
hsa-mir-1182	0	0	0	0	0	0	0	0	0	0	0	0	0	0	0	0	0	0	0	0	0	0	0	0	0	0	0	0	0	0	0	0	0	0	0	0	0	0	0	0	0	0	0	0	0	0	0	0	0
hsa-mir-1183	0	0	0	0	0	0	0	0	0	0	0	0	0	0	0	0	0	0	0	0	0	0	0	0	0	0	0	0	0	0	0	0	0	0	0	0	0	0	0	0	0	0	0	0	0	0	0	0	0
hsa-mir-1184-1	0	0	0	0	0	0	0	0	0	0	0	0	0	0	0	0	0	0	0	0	0	0	0	0	0	0	0	0	0	0	0	0	0	0	0	0	0	0	0	0	0	0	0	0	0	0	0	0	0
hsa-mir-1184-2	0	0	0	0	0	0	0	0	0	0	0	0	0	0	0	0	0	0	0	0	0	0	0	0	0	0	0	0	0	0	0	0	0	0	0	0	0	0	0	0	0	0	0	0	0	0	0	0	0
hsa-mir-1184-3	0	0	0	0	0	0	0	0	0	0	0	0	0	0	0	0	0	0	0	0	0	0	0	0	0	0	0	0	0	0	0	0	0	0	0	0	0	0	0	0	0	0	0	0	0	0	0	0	0
hsa-mir-1185-1	1.15718	0	0.286513	0	0.876125	0.237715	0	0	0	0	1.08798	0.367374	0	0.751135	0.726588	0.351701	0	0	1.06313	0.828799	0	0.691319	0.572121	0	0	1.26985	0	0	0.532417	0.871148	0	1.06317	0	0	0.869361	0	0	0.221121	0.609383	0.479139	0.729655	0.341756	0.532378	0.994435	0.485863	0.41047	0.365581	0.517984	0.970717
hsa-mir-1185-2	0	0	0	0	0.273647	0	0.111221	0.677277	0.655751	0.712084	0	0	0	0	0	0	0	0	0	0.473115	0	0.691319	0	0	0.462865	0.770352	0	0	0	0	0.406994	0	0.59822	0	1.21597	0.486129	0.249311	0	0	0.25937	0.410474	0.341756	1.35732	0	0.485863	0.114074	0.194339	0.282115	1.13735
hsa-mir-1193	0.386867	0	0	0	0	0	0	0	0	0	0	0	0	0	0	0	0	0	0	0	0	0	0	0	0	0	0	0	0	0	0	0	0	0	0	0	0	0	0	0	0	0	0	0	0.263288	0	0	0	0
hsa-mir-1197	0.386867	0	0.286513	0	0.273647	0	0.111221	0	0	0	0.459696	0	0	0	0	0	0	0	0	0	0	0	0	0	0	0	0	0	0	0	0	0.627385	0	0	0.220789	0	0	0.221121	0	0.25937	0.410474	0	0.290608	0	0.485863	0	0.365581	0	0.310287
hsa-mir-1199	0	0	0	0.760351	0	0	0	0	0	0	0	0	0	0	0	0	0	0	0	0	0	0	0	0	0	0	0	0	0	0	0	0	0	0	0	0	0	0	0	0	0.219786	0	0	0	0	0	0	0	0
hsa-mir-1-2	3.31019	4.3045	2.74672	2.26797	2.6849	5.57205	6.16696	3.69848	5.07895	4.02822	7.91386	6.67541	3.39991	4.12058	0.726588	7.74414	6.91228	1.7794	1.89672	6.7719	1.77109	3.43778	2.7741	2.89072	4.8	0.770352	2.13359	2.75118	2.50758	6.07316	4.08492	5.07407	1.34571	3.42132	4.14588	6.99339	3.32979	7.896	6.10441	6.45061	7.03888	6.39912	4.31963	4.61379	5.21871	7.84694	7.52009	7.1302	4.09397
hsa-mir-1200	0	0	0	0	0	0	0	0	0	0	0	0	0	0	0	0	0	0	0	0	0	0	0	0	0	0	0	0	0	0	0	0	0	0	0	0	0	0	0	0	0	0	0	0	0	0	0	0	0
hsa-mir-1202	0	0	0	0	0	0	0	0	0	0	0	0	0	0	0	0	0	0	0	0	0	0	0	0	0	0	0	0	0	0	0	0	0	0	0	0	0	0	0	0	0	0	0	0	0	0	0	0	0
hsa-mir-1203	0	0	0	0	0	0	0	0	0	0	0	0	0	0	0	0	0	0	0	0	0	0	0	0	0	0	0	0	0	0	0	0	0	0	0	0	0	0	0	0	0	0	0	0	0	0	0	0	0
hsa-mir-1204	0	0	0	0	0	0	0	0	0	0	0	0	0	0	0	0	0	0	0	0	0	0	0	0	0	0	0	0	0	0	0	0	0	0	0	0	0	0	0	0	0	0	0	0	0	0	0	0	0
hsa-mir-1205	0	0	0	0	0	0	0	0	0	0	0	0	0	0	0	0	0	0	0	0	0	0	0	0	0	0	0	0	0	0	0	0	0	0	0	0	0	0	0	0	0	0	0	0	0	0	0	0	0
hsa-mir-1206	0	0	0	0	0	0	0	0	0	0	0	0	0	0	0	0	0	0	0	0	0	0	0	0	0	0	0	0	0	0	0	0	0	0	0	0	0	0	0	0	0	0	0	0	0	0	0	0	0
hsa-mir-1207	0	0	0	0	0	0	0	0	0	0	0	0	0	0	0	0	0	0	0	0	0	0	0	0	0	0	0	0	0	0	0	0	0	0	0	0	0	0	0	0	0	0	0	0	0	0	0	0	0
hsa-mir-1208	0	0	0	0	0	0	0	0	0	0	0	0	0	0	0	0	0	0	0	0	0	0	0	0	0	0	0	0	0	0	0	0	0	0	0	0	0	0	0	0	0	0	0	0	0	0	0	0	0
hsa-mir-122	2.3214	0.746801	0.730372	0	0	0	0.229065	0	0	0	0	0	0	2.35013	0	0.351701	0	0	0	0.828799	2.07639	2.40689	0	0	1.70914	0	0	0	0	0	0	0	0	0	0	0.263444	0	1.31658	0	0.25937	0	0	0	0.412258	0	0	0.194339	0	0
hsa-mir-1224	0.386867	0.746801	0.909778	0	0	2.50009	0	0	0	0	1.32251	1.11104	0.675559	0	0	0	0	0	0	0.473115	1.38336	1.15673	1.55916	0	1.86708	0.770352	0	0.863107	0	0	2.84649	0	1.34571	0	4.56412	3.00215	0.249311	1.2173	0.232909	0.373436	2.64753	2.39965	1.08119	2.21364	0.485863	0.578869	3.03738	0	0.310287
hsa-mir-1225	0.386867	0.538086	0	0	0	0	0.126884	0	0	0	0	0	0	0	0	0	0	0	0	0	0	0	0	0	0.462865	0.770352	0	0	0	0	0.406994	0	0.59822	0	0	0	0	0	0	0	0.219786	0	0	0	0	0.114074	0	0	0.310287
hsa-mir-1226	1.50858	0.293986	2.74672	2.16012	0.876125	0.922669	0.653323	1.76404	1.10492	2.06724	0.459696	0.367374	1.7608	1.24259	1.20754	0.634248	0	2.5523	1.89672	0.473115	0.851499	1.79037	0	0	1.70914	1.64018	0.885202	1.15603	0.532417	1.80213	1.39484	1.66859	0.59822	2.76031	1.10942	1.26447	1.70649	0.733401	1.71265	0.669814	0.729655	0.849514	1.4778	1.21603	0.485863	0.497126	1.28806	1.19903	1.42206
hsa-mir-1227	0	0.293986	0.286513	0	0.273647	0	0	0	0	0.712084	0	0	0	0.751135	0.726588	0	0	0	0.627355	0	0	0	0	0	0	0	0	0	0	0.500352	0.406994	0	0	0	0	0	0	0	0.232909	0.135506	0.219786	0.341756	0.290608	0.412258	0	0	0	0.282115	0.310287
hsa-mir-1228	1.15718	0	2.02703	2.16012	0.876125	0.779466	0.533935	0.847055	1.10492	1.54325	2.00073	0.367374	0	0	0	0	1.16072	2.08535	1.39736	0	0	1.79037	0	1.31075	1.53176	0	0.885202	1.39939	0.739437	0.871148	1.39484	0	0.59822	0.837988	1.72909	0.486129	1.0921	0.221121	1.46049	0.577625	0.990857	0.617859	1.22585	0.412258	1.00076	0.799516	0.518636	1.32874	1.95585
hsa-mir-1229	1.15718	0.538086	2.4313	0.429697	0.701841	0.779466	0.600484	0.998941	1.10492	0.712084	0.807771	0.367374	0.675559	0	0	1.07331	1.16072	2.90449	1.89672	0	0	1.50806	0	0	1.09412	0.770352	0	1.15603	0	0	0.983867	0.627385	0	1.85806	0.732472	0.486129	1.0921	0.412811	0.609383	0.479139	0.578873	0.341756	0.739388	0.412258	0.263288	0.114074	0.365581	0.282115	0.565507
hsa-mir-1231	0	0	0	0	0	0	0	0	0	0	0	0	0	0.751135	0	0	0	0	0	0	0	0	0	0	0.462865	0	0	0	0	0	0	0	0	0	0	0	0	0	0	0	0	0	0	0	0	0	0	0	0
hsa-mir-1233-1	0	0	0	0	0	0	0	0	0	0	0	0	0	0	0	0	0	0	0	0	0	0	0	0	0	0	0	0	0	0	0	0	0	0	0	0	0	0	0	0	0	0	0	0	0	0	0	0	0
hsa-mir-1233-2	0	0	0	0	0	0	0	0	0	0	0	0	0	0	0	0	0	0	0	0	0	0	0	0	0	0	0	0	0	0	0	0	0	0	0	0	0	0	0	0	0	0	0	0	0	0	0	0	0
hsa-mir-1234	0.386867	0	0	0.429697	0	0.441747	0	0	0	0	0	0.367374	0	0	0	0	0	0	0	0	0	1.15673	0	0	0	0	0	0	0	0	0.406994	0	0	0.837988	0	0.263444	0	0	0	0	0	0.341756	0	0.412258	0	0	0.194339	0.282115	0.565507
hsa-mir-1236	0	0	0	0	0	0	0.126884	0	0	0	0	0	0	0	0	0	0	0	0	0	0	0.691319	0	0	0	0	0	0	0	0	0	0	0	0	0	0	0	0	0	0	0	0	0	0	0	0	0	0	0
hsa-mir-1237	0	0	0.286513	0.429697	0	0	0.126884	0.262681	0	0.712084	0	0	0	0	0	0	0	0	0	0	0.851499	0	0	0	0.462865	1.26985	0	0	0	0	0.406994	0	0	0	0	0.263444	0	0	0	0.135506	0	0	0	0	0	0	0.194339	0	0
hsa-mir-1238	0	0	0	0	0	0	0	0.262681	0	0	0	0	0	0	0	0	0	0	0	0	0	0	0	0	0	0	0	0	0	0	0	0	0	0	0	0	0	0.221121	0	0	0	0	0	0	0	0	0	0	0
hsa-mir-124-1	0	0	0	0	0	0	0	0	0	0	0.459696	0	0	0.751135	0	0	0	0	0	0	0	0	0	0	0	0	0	0.863107	0	0	0.724074	0	0	0	0	0.263444	0	0	0	0.135506	0.219786	0	0	0.412258	0	0	0	0	0
hsa-mir-124-2	0	0	0	0	0	0	0	0	0	0	0.459696	0	0	0	0	0.351701	0	0	0	0	0	0	0	0	0	0	0	0	0	0	0.406994	0	0	0	0.220789	0	0.46182	0	0	0	0	0	0	0	0	0.114074	0.365581	0.282115	0
hsa-mir-1243	0	0.538086	0	0	0	0.237715	0	0	0	0	0	0	0	0	0	0	0	0	0	0	0	0	0	0	0	0	0	0	0	0	0	0	0	0	0	0	0	0	0	0	0.219786	0	0	0	0	0.114074	0	0	0
hsa-mir-124-3	0	0	0	0	0	0	0.111221	0	0	0	0	0	0	0	0	0	0	0	0	0	0	0	0	0	0	0	0	0	0	0	0.406994	0	0.59822	0	0.220789	0	0	0.221121	0	0	0	0.341756	0.290608	0	0.263288	0.318275	0.194339	0	0
hsa-mir-1244-1	0	0	0	0	0	0	0	0	0	0	0	0	0	0	0	0	0	0	0	0	0	0	0	0	0	0	0	0	0	0	0	0	0	0	0	0	0	0	0	0	0	0	0	0	0	0	0	0	0
hsa-mir-1244-2	0	0	0	0	0	0	0.126884	0	0	0	0	0	0	0	0	0	0	0	0	0	0	0	0	0	0	0	0	0	0	0	0	0	0	0	0	0	0	0	0	0	0	0	0	0	0	0	0	0	0
hsa-mir-1244-3	0	0	0	0	0	0	0	0	0	0	0	0	0	0	0	0	0	0	0	0	0	0	0	0	0	0	0	0	0	0	0	0	0	0	0	0	0	0	0	0	0	0	0	0	0	0	0	0	0
hsa-mir-1244-4	0	0	0	0	0	0	0	0	0	0	0	0	0	0	0	0	0	0	0	0	0	0	0	0	0	0	0	0	0	0	0	0	0	0	0	0	0	0	0	0	0	0	0	0	0	0	0	0	0
hsa-mir-1245a	1.15718	1.97757	2.69871	1.77764	2.18606	2.01618	1.32418	2.72067	1.95501	2.4508	3.08832	2.33915	0	3.49143	1.56762	2.28241	3.3308	2.33763	0.627355	2.68559	0.851499	1.79037	0	2.44417	1.53176	2.17901	2.95906	1.15603	1.87896	1.80213	0.406994	3.35909	1.01984	1.20951	1.93028	0.84909	1.32718	1.80098	0.766222	2.08739	2.30727	0.617859	2.76597	0	1.13833	1.57275	1.44911	1.44774	2.99252
hsa-mir-1245b	0	0	0	0	0	0	0	0.484822	0	0	0.459696	0	0	0	0	0	0	0	0	0	0	0	0	0	0	0	0	0	0	0	0	0	0	0.336305	0	0.263444	0	0	0	0.479139	0	0	0.290608	0	0	0.219784	0.365581	0	0
hsa-mir-1246	0	0	0	0.760351	0	0	0	0	0	0.712084	0	0	0	0.751135	0	0	0	0.856743	0	0	0.851499	0	0.572121	0	0.462865	1.26985	1.42977	0	0	0	0.406994	0	0	0	0	0	0	0	0	0	0	0	0	0	0	0	0	0	0
hsa-mir-1247	1.34355	2.87354	6.13795	4.59966	4.16331	3.5761	2.50085	5.12722	5.17399	4.23793	5.42721	2.93924	2.8016	5.46062	2.09545	5.06934	5.76941	3.62682	2.80571	7.38798	2.72915	2.95649	2.55264	4.76336	4.61194	2.38795	7.43417	4.9299	1.47788	4.13606	8.90033	6.37006	2.8412	4.99897	5.99641	5.85041	3.78946	5.92196	4.12673	4.09186	6.8398	4.30092	4.09316	4.23736	5.43445	4.29847	5.99056	4.66706	3.3727
hsa-mir-1248	2.3214	2.46479	1.86246	5.10045	2.81904	3.26272	2.01549	2.72067	1.95501	3.21664	2.35833	1.11104	0.675559	2.96923	2.78502	1.07331	1.95727	1.39061	2.80571	1.11391	1.77109	1.15673	1.29873	1.57254	1.09412	2.57041	2.38822	0.495159	1.22592	1.61955	1.71433	1.39741	0	0.608844	2.21355	0.84909	1.6206	1.99331	1.03648	0.756464	0.866159	0.849514	0.290608	1.40808	0.848674	1.57275	1.44911	2.15563	1.95585
hsa-mir-1249	1.91378	0.746801	1.94709	2.46215	0.701841	1.1724	0.633753	0.847055	0.655751	1.54325	0.807771	0	0	0.751135	1.85554	0	0.86694	0.856743	1.89672	0.473115	1.38336	0	0	0.990691	1.53176	1.26985	1.42977	0.863107	0	0.871148	0.406994	0	1.34571	1.20951	2.10682	0.84909	1.32718	0.581993	0.766222	0.838204	0.990857	0.341756	1.22585	1.57754	1.00076	1.35801	0.783247	1.65982	0.970717
hsa-mir-1250	0	0	0.286513	0	0	0	0.229065	0	0	0	0	0	0.675559	0	0	0	0	0	0	0	0	0	0	0.578763	0	0	0	0	0	0	0	0	0	0	0.220789	0	0	0.221121	0	0.25937	0	0	0	0	0	0	0	0	0
hsa-mir-1251	0	0	0	0	0	0	0	0	0	0	0.459696	0	0	0	0	0.870418	0	0	0.627355	0	0.851499	0	0.572121	0	0.462865	0	0	0	0	0	2.70943	1.89678	0	0.837988	0	1.00123	4.21284	0	6.33793	0.135506	0	1.04907	0	1.72917	0	0.219784	0.518636	0.282115	0.310287
hsa-mir-1252	0	0	0	0	0	0	0	0	0	0	0	0	0	0	0	0	0	0	0	0	0	0	0	0	0	0	0	0	0	0	0	0	0	0	0	0	0.46182	0	0	0	0	0	0.290608	0	0	0	0	0	0
hsa-mir-1253	0	0	0	0	0	0	0	0	0	0	0	0	0	0	0	0	0	0	0	0	0	0	0	0	0	0	0	0	0	0	0	0	0	0	0	0	0	0	0	0	0	0	0	0	0	0	0	0	0
hsa-mir-1254-1	0.943099	0.538086	1.34359	0	0.701841	0.237715	0.3514	1.48406	0	1.18672	0.807771	0.367374	0	0	0.726588	0.634248	0.86694	0.856743	0.627355	0	0	0	0	0	1.32947	0.770352	1.42977	0	1.3574	0.500352	0.406994	0	0.59822	1.50469	0.220789	0.263444	0.46182	0.221121	1.46049	0.25937	0	0.341756	1.96385	0	0.485863	0.114074	0	0.517984	0.782292
hsa-mir-1254-2	1.15718	0.538086	0.909778	0.429697	1.03161	0.922669	0.338005	1.67661	1.10492	1.54325	1.08798	0	0	0.751135	0	0.634248	0	0	1.06313	0	0	0	0	0.578763	1.09412	0	0.885202	0	0.739437	0.500352	0	0	1.01984	1.74961	0.220789	0.678994	1.0921	0.221121	1.36559	0	0.410474	0	0.920387	0.994435	0.263288	0	0	0	0.310287
hsa-mir-1255a	0.691626	0.929102	1.21296	2.04354	0.273647	0	0.611659	1.2618	0	0	0	0	0	1.24259	1.20754	0.351701	0	0	0	0	0.851499	0.691319	0	0.578763	1.53176	0.770352	0	0.495159	0.739437	0	0.724074	0	0.59822	1.03568	1.21597	0.678994	1.0921	0.733401	0.766222	0.577625	0.219786	0.849514	0	0	0.263288	0.114074	0	0.282115	1.13735
hsa-mir-1255b-1	0	0	0	0	0	0	0	0	0	0	0	0	0	0	0	0	0	0	0	0	0	0	0	0	0	0	0	0	0	0	0	0	0	0	0	0	0	0	0	0	0	0	0	0	0	0	0	0	0
hsa-mir-1255b-2	0	0	0	0	0	0	0	0	0	0	0	0	0	0	0	0	0	0	0	0	0	0	0	0	0	0	0	0	0	0	0	0	0	0	0	0	0	0	0	0	0	0	0	0	0	0	0	0	0
hsa-mir-1256	0.386867	0	0.525446	0	0	0	0	0	0	0	0	0.367374	0	0	0	0	0	0	0	0	0	0	0.572121	0	0.462865	0	0	0	0	0	0	0	0	0.336305	0	0.263444	0	0	0.907669	0	0	0	0	0	0	0	0	0	0
hsa-mir-1257	0	0	0	0	0	0	0	0	0	0	0	0	0	0	0	0.351701	0	0	0	0	0	0	0	0.990691	0	0.770352	0	0	0	0	0.724074	0	0	0	0	0	0	0	0	0	0.410474	0	0.290608	0	0	0	0	0.282115	0
hsa-mir-1258	1.15718	1.80168	0.286513	2.04354	0.701841	1.05293	0.214479	0.847055	0	0.712084	2.46023	1.85201	0	1.24259	1.56762	2.76497	1.61328	0.856743	0	0.473115	0	1.15673	0.572121	0.578763	1.09412	0.770352	1.82418	0.495159	2.12023	0.500352	0.406994	2.56141	0.59822	0.837988	1.86629	0.84909	2.19665	2.26594	1.03648	1.36493	1.65044	0.617859	0.739388	0	1.37945	1.86114	2.66344	2.08394	0.782292
hsa-mir-125a	8.91843	8.42859	9.9523	8.35374	8.08356	9.2829	8.40709	9.69415	9.15217	9.1145	8.47873	8.07747	8.52235	8.71573	7.33456	9.07501	8.72376	8.83526	9.25269	8.34114	6.82798	7.46615	6.93298	9.07014	8.33162	7.89121	8.53585	8.41652	8.60565	8.32474	10.0883	9.32071	7.13716	9.33365	8.77231	9.64631	9.47989	9.07413	8.7578	8.90599	9.21171	9.69492	9.70744	8.99449	7.75239	8.68646	9.5623	9.01031	9.42925
hsa-mir-125b-1	7.6592	8.90332	8.52482	7.23397	7.86962	8.52717	8.45347	8.13334	8.49904	7.32681	8.06099	7.53031	6.4129	7.36587	5.62788	8.4947	7.87878	6.14448	5.59668	7.87429	4.55597	5.21997	6.41279	6.54376	7.6707	5.61432	7.25377	6.22315	6.23491	8.00673	7.53758	7.2928	4.94501	7.32979	9.44955	9.02371	9.02796	8.51792	8.69149	8.58822	9.41909	8.41928	9.43579	7.08345	8.21292	9.01004	9.11038	8.79009	8.15778
hsa-mir-125b-2	7.73197	8.99308	8.48468	7.37633	7.96194	8.6227	8.43256	8.30532	8.4091	7.49446	8.2092	7.60956	6.19501	7.60737	5.5694	8.5908	7.97639	6.42877	5.66022	7.89796	4.69686	5.46052	6.39621	6.61813	7.68668	6.08831	7.51657	6.33714	6.45272	8.02751	7.77934	7.46726	5.0382	7.33214	9.53757	9.0226	9.02065	8.48828	8.72174	8.616	9.48551	8.39084	9.48155	7.16551	8.51011	9.07355	9.24367	8.79009	8.24822
hsa-mir-126	11.5269	12.0989	11.9823	12.6735	11.4366	11.6426	10.6915	11.421	12.6195	11.5516	11.0358	10.6199	13.6403	12.363	13.2259	11.3688	12.5633	11.9949	11.6913	10.5348	11.3943	12.374	11.0677	12.0434	11.2096	12.529	12.3146	11.8561	11.6896	12.3327	11.0154	11.8852	11.0555	12.4131	11.9547	11.8468	12.2826	11.0239	12.9558	11.8153	11.7269	12.5278	13.0086	12.4667	8.63814	10.6152	11.6469	12.2624	12.3535
hsa-mir-1260a	0	0	0	0	0	0	0	0	0	0	0	0	0	0	0	0	0	0	0	0	0	0	0	0	0	0	0	0	0	0	0	0	0	0	0	0	0	0	0	0	0	0	0	0	0	0	0	0	0
hsa-mir-1260b	0	0.293986	0	0	0	0.237715	0	0.262681	0	0	0	0	0	0	0	0	0	0	1.06313	0	0	0	0	0	0.462865	0	0	0.495159	0	0	0	0	0	0	0	0	0.249311	0	0	0	0	0	0	0	0	0	0	0.282115	0
hsa-mir-1261	0	0	0	0	0	0	0	0	0	0	0	0	0	0	0	0	0	0	0	0	0	0	0	0	0	0	0	0	0	0	0	0	0	0	0	0	0	0	0	0	0	0	0	0	0	0	0	0	0
hsa-mir-1262	1.65666	0.538086	0.730372	0.760351	0.503572	1.28273	0.324485	0.262681	0	0	1.85868	1.59933	1.7608	0.751135	1.56762	1.07331	1.16072	0	0	1.35186	0.851499	0.691319	0.572121	1.31075	2.00942	0	1.42977	0.863107	1.08125	1.16586	1.71433	0.627385	0	1.50469	0.732472	0.678994	0.249311	1.2173	1.6334	0.91556	0.410474	1.22434	0.739388	1.57754	0.263288	0.929849	1.59398	0.720654	2.20142
hsa-mir-1263	0	0	0	0	0	0	0	0	0	0	0	0	0	0	0	0	0	0	0	0	0	0	0	0	0	0	0	0	0	0	0	0	0	0	0	0	0	0	0	0	0	0	0	0	0	0	0	0	0
hsa-mir-1264	0	0	0	0	0	0	0	0	0	0	0	0	0	0	0	0	0	0	0	0	0	0	0	0	0	0	0	0	0	0	0	0	0	0.336305	0	0	0	0	0	0	0	0	0	0	0	0	0	0	0
hsa-mir-1265	0	0	0	0	0	0	0	0	0	0	0	0	0	0	0	0	0	0	0	0	0	0	0	0	0	0	0	0	0	0	0	0	0	0	0	0	0	0	0	0.135506	0	0	0	0	0	0	0.194339	0	0
hsa-mir-1266	2.22978	2.82835	5.48279	3.67766	5.27033	4.02019	2.93319	5.50255	4.86772	4.33236	2.46023	3.278	4.63741	4.6386	3.81705	3.48728	4.1609	5.34824	3.28032	4.17605	4.60448	5.97935	1.97094	5.52088	6.47797	5.73392	6.30243	4.45176	4.48702	5.86317	3.38566	3.92256	3.42802	5.87016	4.82202	4.25026	5.01409	4.00658	4.66409	2.18435	2.89101	3.73289	4.58406	4.9892	2.07155	2.01591	3.87765	3.30086	5.68342
hsa-mir-1267	0	0	0	0	0	0	0	0	0	0	0	0	0	0	0	0	0	0	0.627355	0	0	0.691319	0.572121	0	0	0	0.885202	0	0	0	0	0	0	0	0	0	0.249311	0	0	0	0	0	0	0	0	0	0	0	0
hsa-mir-1268a	0	0	0	0	0	0	0	0	0	0	0	0	0	0	0	0	0	0	0	0	0	0	0	0	0	0	0	0	0	0	0	0	0	0	0	0	0	0	0	0	0	0	0	0	0	0	0	0	0
hsa-mir-1268b	0	0	0.286513	0	0	0	0	0	0	0	0	0	0	0	0	0	0	0	0	0	0	0	0	0	0	0	0	0	0	0	0	0	0	0	0	0	0	0	0	0	0	0	0	0	0	0	0	0	0
hsa-mir-1269a	0	0	1.67667	0.760351	1.03161	0	0	0.262681	0.655751	0	0	0	0	1.6085	0.726588	6.32608	0.86694	0	2.42165	0.828799	0	1.15673	2.4277	1.79404	1.09412	1.26985	0	4.18571	0	0	9.33611	1.39741	0.59822	0.336305	0.41223	0	8.24053	0.412811	0.609383	0.669814	0.866159	0	4.78427	0	0	0	1.00676	3.0606	0.565507
hsa-mir-1269b	0	0.293986	0	0	0	0	0	0	0	0	0	0	0	0	0	0	0	0	0	0	0	0	0	0	0	0	0.885202	0	0	0	6.89461	0	4.20718	0	0.220789	0	5.99586	0	0.232909	0	0	0	0	0	0.485863	0.114074	0	0	0
hsa-mir-127	9.88257	10.5202	11.2012	9.61739	9.92727	9.00515	8.39397	9.76342	10.1575	9.71567	10.3026	8.74596	8.89779	10.3	8.77379	9.34986	9.56146	10.0902	8.65468	9.67657	8.11322	9.26622	8.3188	9.1981	10.3266	9.99935	10.8944	9.14381	9.20228	8.77597	9.21632	9.79332	8.28721	9.28591	11.2594	10.3394	8.6807	8.71561	9.74675	9.99428	10.0618	9.05343	10.6412	9.12586	10.7832	9.76916	9.70622	9.74954	10.4769
hsa-mir-1270	3.92099	0.538086	2.30871	1.62373	1.03161	0.237715	0.922766	1.37721	1.10492	2.06724	0.807771	0.367374	1.99497	0	1.56762	0.634248	0	1.7794	1.66854	0	0	2.02637	0	0	1.32947	0	0	0.495159	0	0	3.24396	1.39741	0.59822	2.14168	0.581218	1.00123	2.19665	0.412811	2.51865	1.18917	1.21194	1.87695	2.56302	1.86637	0.485863	0.729651	1.28806	2.9029	1.54579
hsa-mir-1271	1.91378	1.97757	2.88186	2.26797	0.701841	1.88239	0.96518	1.2618	2.15465	2.4508	0.459696	0.903046	1.99497	2.69263	2.3011	2.19813	1.61328	2.33763	1.39736	1.11391	0	1.50806	1.29873	2.56941	1.70914	2.17901	2.38822	2.46054	1.3574	1.80213	3.63311	2.56141	2.02966	1.74961	2.7274	2.43496	2.00656	2.26594	1.85919	1.87141	1.92506	2.07299	2.50748	1.72917	1.00076	1.65043	1.95754	1.55767	2.75679
hsa-mir-1272	0	0	0	0	0	0	0	0	0	0	0	0	0	0	0	0	0	0	0	0	0	0	0	0	0	0	0	0	0	0	0	0	0	0	0	0	0	0	0	0	0	0	0	0	0	0	0	0	0
hsa-mir-1273a	0	0	0	0	0	0	0	0	0	0	0	0	0	0	0	0	0	0	0	0	0	0	0	0	0	0	0	0	0	0	0	0	0	0	0	0	0	0	0	0	0	0	0	0	0	0	0	0	0
hsa-mir-1273c	0	0	0	0	0	0	0	0	0	0	0	0	0	0	0	0	0	0	0	0	0	0	0	0	0	0	0	0	0	0	0	0	0	0	0	0	0	0	0	0	0	0	0	0	0	0	0	0	0
hsa-mir-1273d	0	0	0	0	0	0	0	0	0	0	0	0	0	0	0	0	0	0	0	0	0	0	0	0	0	0	0	0	0	0	0	0	0	0	0	0	0	0	0	0	0	0	0	0	0	0	0	0	0
hsa-mir-1273e	0	0	0	0	0	0	0	0	0	0	0	0	0	0	0	0	0	0	0	0	0	0	0	0	0	0	0	0	0	0	0	0	0	0	0	0	0	0	0	0	0	0	0	0	0	0	0	0	0
hsa-mir-1273f	0	0	0	0	0	0	0	0	0	0	0	0	0	0	0	0	0	0	0	0	0	0	0	0	0	0	0	0	0	0	0	0	0	0	0	0	0	0	0	0	0	0	0	0	0	0	0	0	0
hsa-mir-1273g	0	0	0	0	0	0	0	0	0	0	0	0	0	0	0	0	0	0	0	0	0	0	0	0	0	0	0	0	0	0	0	0	0	0	0	0	0	0	0	0	0	0	0	0	0	0	0	0	0
hsa-mir-1273h	0	0.293986	0	0	0	0	0	0	0	0	0	0	0	0	0	0	0	0	0	0	0	0	0	0	0.462865	0	0	0	0	0	0	0.627385	0	0.608844	0	0	0.46182	0	0	0	0	0.341756	0	0	0	0	0.194339	0	0
hsa-mir-1275	0.386867	0.293986	0	0.429697	0	0	0	0.262681	0	0	0	0	0	0	0	0.351701	0	0	0	0	0.851499	0	3.2132	2.15542	0	1.26985	0	0	0.290631	0	0.406994	0	2.49176	0.336305	0.41223	0.678994	0.647008	0.221121	0.433392	0.135506	0	0	0.290608	0	0.678643	0.219784	0.194339	0.282115	0.310287
hsa-mir-1276	0.691626	0	0.286513	0.760351	0.273647	0	0	0.484822	0	0	0	0.367374	0	0.751135	1.56762	0	0	1.7794	0	0.473115	1.38336	0.691319	0	0	0.462865	0.770352	1.42977	0.495159	0.290631	0	0.724074	0	0.59822	0	0	0	0.958431	0	0.232909	0	0	0	0.290608	0	0	0.114074	0.194339	0	0.310287
hsa-mir-1277	0.943099	0.929102	1.06932	2.46215	1.03161	0.237715	0.533935	1.48406	1.10492	2.61008	0.459696	0.367374	1.48111	2.1426	2.91594	1.40946	1.40467	0.856743	1.89672	0.473115	0	2.02637	1.97094	1.31075	3.16089	2.17901	0	0.863107	0.739437	2.36334	1.39484	1.06317	2.20067	1.85806	0.581218	1.13884	2.77564	1.11068	2.51865	1.41907	0.410474	2.07299	2.32677	2.65358	0	0.578869	0.518636	1.65982	1.76534
hsa-mir-1278	0.386867	0	0	0.760351	0	0.441747	0	0	0	0	0	0	0	0.751135	0	0	0	0	0	0	0.851499	0	0	0	0	1.26985	0	0	0	0.500352	0.406994	0	0	0.336305	0.220789	0	0	0.221121	0	0	0.219786	0	0	0	0	0	0.194339	0	0.310287
hsa-mir-1279	0	0	0	0	0	0	0	0	0	0	0	0	0	0	0	0	0	0	0	0	0	0	0	0	0	0	0	0	0	0	0	0	0	0	0	0	0	0	0	0	0	0	0	0	0	0	0	0	0
hsa-mir-1281	0	0	0	0	0	0	0	0	0	0	0	0	0	0	0	0	0	0	0	0	0	0	0	0	0.462865	0	0	0	0	0	0	0	0	0	0	0	0	0	0	0	0	0	0	0	0	0	0	0	0
hsa-mir-128-1	7.08436	6.3075	6.44853	6.28583	5.52712	5.76021	4.71167	5.2306	5.30576	5.62938	5.25361	4.54413	5.9798	5.13569	6.19021	5.25809	4.95737	6.50803	5.56383	5.08699	5.52497	6.92473	4.89316	5.56667	6.22427	6.72992	6.17293	5.45927	5.37913	5.56775	6.39978	4.61027	6.10492	6.51679	6.0799	5.44202	6.0747	4.79014	6.31271	5.73317	5.05545	5.31318	6.18698	5.11845	4.92747	5.08722	5.44424	5.36358	6.02387
hsa-mir-1282	0	0	0	0	0	0	0	0	0	0	0	0	0	0	0	0	0	0	0	0	0	0	0	0	0	0	0	0	0	0	0	0	0	0	0	0	0	0	0	0	0	0	0	0	0	0	0	0	0
hsa-mir-128-2	6.74702	5.65171	5.93015	5.68111	4.59595	4.80057	4.42503	4.6984	4.8097	5.27247	4.66627	4.15544	5.35802	5.24368	6.0404	4.93257	4.51289	6.20916	4.95234	3.82736	4.22468	6.3274	4.3206	5.04797	5.87961	6.14696	5.69547	4.96815	5.10753	4.96637	6.04841	4.11627	5.66798	6.05809	5.65193	4.71386	5.5727	4.07906	5.65053	4.96953	4.29244	4.76528	5.51899	4.92781	4.87922	4.38624	4.89219	4.70339	5.62149
hsa-mir-1283-1	0	0	0	0	0	0	0	0	0	0	0	0	0	0	0	0	0	0	0	0	0	0	0	0	0	0	0	0	0	0.500352	0	0	0	0	0	0	0	0	0	0	0	0	0	0	0	0	0	0.282115	0
hsa-mir-1283-2	0	0	0	0	0	0.237715	0	0	0	0	0	0	0	0	0	0	0	0	0	0	0	0	0	0	0	0	0	0	0	0	0.724074	0	0	0	0	0	0	0	0	0	0	0	0	0	0	0	0	0.898329	0
hsa-mir-1284	0	0.293986	1.57396	1.02917	0.273647	0	0.533935	0	0	0	0	0	0.675559	0.751135	0.726588	0	0	0.856743	0	0	0	0.691319	0	0	0.812745	0.770352	1.42977	0	0.739437	0	0.406994	0	0	1.20951	0.41223	0.263444	0.647008	0	1.36559	0.577625	0.219786	0	0.532378	0.412258	0	0.114074	0.194339	0.282115	0.782292
hsa-mir-1285-1	0	0	0	0.429697	0	0.237715	0.126884	0.262681	0	0	0	0	0	0	0	0	0	0	0	0	0	0	0	0	0	0	0	0.495159	0	0	0	0	0	0	0	0	0.249311	0	0	0	0	0	0.290608	0	0	0	0	0	0
hsa-mir-1285-2	0	0	0	0	0	0	0	0	0	0	0	0	0	0	0	0	0	0	0	0	0	0	0	0	0	0	0	0	0	0	0	0	0	0	0	0	0	0	0	0	0	0	0	0	0	0	0	0	0
hsa-mir-1286	0	0	0.286513	0	0.273647	0	0	0	0	0	0	0	0	0	0	0	0	0	0	0	0	0	0	0	0	0	0	0	0	0	0.724074	0	0	0.608844	0	0	0	0	0	0.25937	0	0	0	0	0	0	0	0	0
hsa-mir-1287	5.69337	4.53295	4.90684	4.19752	3.09068	4.51432	3.84452	5.04234	4.71804	5.57248	3.82108	3.84199	4.09801	4.85837	3.88256	4.79588	4.05762	4.51699	5.24951	3.7039	2.72915	5.73483	1.29873	4.83995	4.07789	3.98362	5.2581	3.85924	4.44329	5.4358	5.44941	4.54444	3.62113	5.38164	4.80506	4.33862	4.46777	4.28921	4.64401	4.51489	4.056	4.37713	4.44317	4.04841	3.29415	3.77305	4.68135	4.64232	4.24766
hsa-mir-1288	0.943099	0.293986	1.06932	1.45141	0.876125	0.237715	0	0.262681	1.10492	1.18672	0	0	1.48111	1.24259	0	0	1.61328	0	0	0.828799	0	0.691319	0	0.990691	0.462865	1.26985	0.885202	1.78946	0.532417	0.500352	0.983867	0.627385	0.59822	0.336305	0.869361	0.486129	0.46182	0.581993	1.03648	0.756464	0.219786	0.849514	0.532378	0	0	0.866154	1.00676	0.720654	0.565507
hsa-mir-1289-1	0	0	0	0	0	0	0	0	0	0	0	0	0	0	0	0	0	0	0	0	0	0	0	0	0	0	0	0	0	0	0.406994	0	0	0	0.220789	0	0.249311	0	0	0	0	0	0	0	0	0	0	0	0
hsa-mir-1289-2	0	0	0	0	0	0	0	0	0	0	0	0	0	0	0	0	0	0	0	0	0	0	0	0	0	0	0	0	0	0	0	0	0	0	0	0	0	0	0	0	0	0	0	0	0	0	0	0	0
hsa-mir-1290	0	0	0	0	0	0	0	0	0	0	0	0	0	0	0	0	0	0	0	0	0	0	0	0	0	0.770352	0	0	0	0	0	0	0	0	0	0	0	0	0	0	0	0	0	0	0	0	0	0	0
hsa-mir-1291	1.50858	1.23642	0.525446	3.27408	0.503572	0.237715	0.533935	0.484822	0.655751	0	0	0	1.13385	1.24259	0.726588	0	0	0	1.66854	0	0	0	1.29873	0.990691	0.812745	0.770352	0	0	0	0.500352	0.406994	0	1.34571	0.837988	1.21597	1.26447	1.78756	0.412811	1.03648	0.135506	0	0	0.290608	1.21603	0	0	0.365581	0.720654	0.782292
hsa-mir-129-1	0	1.36858	0.525446	1.45141	0	0.441747	1.34306	0.262681	0	1.18672	1.70111	0.903046	0	0.751135	1.56762	2.36204	1.95727	0	0	1.73492	0	1.50806	1.55916	0.578763	1.86708	0.770352	0.885202	0	0.290631	1.61955	1.71433	1.66859	0	1.03568	1.65527	4.68043	1.43176	2.76497	1.03648	4.42515	1.86115	2.78252	0.290608	3.95919	2.26424	2.40014	3.90568	0.282115	0
hsa-mir-1292	0.691626	0	1.06932	0	0.273647	1.05293	0.622749	0.847055	0.655751	1.54325	0	0.367374	0.675559	1.6085	0	0	0.497633	1.39061	1.06313	0	0.851499	1.15673	0	0	0.812745	0.770352	1.42977	0.495159	0.532417	0.871148	1.39484	0.627385	1.34571	0.837988	0.869361	0.678994	0.249311	0	1.71265	0	0.219786	0.341756	1.08119	0.732515	0.485863	0.318275	0.194339	0.282115	0.970717
hsa-mir-129-2	0.943099	2.91737	1.21296	1.02917	0.503572	0	1.65848	0.484822	1.44695	0	1.52419	1.73119	0.675559	1.24259	0.726588	2.64275	1.7955	0	0.627355	1.73492	0.851499	0	1.29873	0.990691	1.09412	0	0	0.863107	0.290631	1.61955	1.97573	1.66859	0.59822	1.03568	2.05034	5.13989	1.0921	3.33773	0.232909	4.56976	1.92506	3.03862	0.739388	4.47048	2.4342	2.25848	4.30349	0.517984	0.565507
hsa-mir-1293	0	0	0.730372	0	0.273647	0.237715	0.695948	0.262681	0	0	0	0	0	0	0.726588	0	0	0.856743	3.43365	0	0	0	0	0.578763	0	0	0	0	1.08125	1.41047	0.406994	0	0	0.608844	0	0.263444	0.249311	0.581993	0	0	0	0	0.290608	0.412258	0	0.114074	0.365581	0	0
hsa-mir-1294	0.386867	0.929102	0.286513	0	0	0	0.111221	0.262681	0	0.712084	0	0.659931	0	0	0	0	0	0	0	0	0	0	0	0.990691	0	0	1.42977	0	0	0	0	0	0.59822	0	0.220789	0	0	0.412811	0.766222	0	0.410474	0.849514	0.532378	0.732515	0.263288	0.114074	0.194339	0.282115	0.565507
hsa-mir-1295a	0	0.929102	0	0.760351	0.701841	0.237715	0.111221	0.484822	0	0.712084	0	0.367374	1.48111	0	0	0.351701	0	0	0	0	0	0.691319	0	0	0.812745	0	0.885202	0.495159	0.290631	0	0.724074	0	0.59822	0.336305	0.869361	0.84909	0.958431	0.733401	0.433392	0.373436	0.410474	1.5216	0.532378	1.57754	0.263288	0	1.10675	0.517984	0.565507
hsa-mir-1295b	0.386867	0.538086	0.286513	0	0	0	0	0	0	0	0	0	0	0	0.726588	0	0	0	0.627355	0	0	0	0	0	0	0	0	0	0.290631	0	0	0	0	0.608844	0	0.678994	0.811106	0.221121	0.766222	0.373436	0	0.341756	0	0.412258	0	0	0.194339	0	0.565507
hsa-mir-1296	4.28193	2.05808	2.69871	3.89511	2.18606	2.30472	0.913765	2.48369	4.09695	2.88395	0.459696	0.659931	2.67241	2.96923	2.3011	1.6819	2.57113	2.90449	0.627355	1.35186	3.04254	2.70771	0.572121	2.307	2.6544	2.73237	3.58632	2.22814	1.08125	3.15001	3.5947	1.06317	3.35745	2.51736	3.6526	3.87019	1.32718	2.93084	4.00607	2.30425	2.89101	3.03862	3.1753	2.99025	2.00114	1.65043	3.18193	2.9029	3.77795
hsa-mir-1297	0	0	0	0	0	0	0	0	0	0	0	0	0	0	0	0	0	0	0	0	0	0	0	0	0	0	0	0	0	0	0	0	0	0	0	0	0	0	0	0	0	0	0	0	0	0	0	0	0
hsa-mir-1298	0	0	0	0	0	0.237715	0.111221	0	0	0	0	0	0	0	0	0	0	0	0	0	0	0	0	0	0.462865	0	0	0	0	0	0.724074	0	0	0	0	0.263444	0	0	0	0	0	0	0	0	0	0	0.365581	0	0
hsa-mir-1299	0	0	0	0	0	0	0	0	0	0	0	0	0	0	0	0	0	0	0	0	0	0	0	0	0	0	0	0	0	0	0	0	0	0	0	0	0	0	0	0	0	0	0	0	0	0	0	0	0
hsa-mir-1301	3.26475	2.52268	4.83092	4.67996	2.73101	3.48672	3.05888	3.63032	4.04761	3.48681	3.02322	1.85201	3.93858	3.87404	5.30847	2.98214	3.86716	4.29658	3.57224	2.7701	2.54257	3.92024	2.13978	4.19179	3.71203	3.13135	5.80881	3.59166	1.96394	3.3971	5.22894	3.0147	3.68016	4.49355	3.76215	3.00215	4.7766	2.26594	3.94173	2.84882	3.07129	2.60375	4.93921	3.16002	2.07155	2.07345	2.59622	4.06749	4.86169
hsa-mir-1302-1	0	0	0	0	0	0	0	0	0	0	0	0	0	0	0	0	0	0	0	0	0	0	0	0	0	0	0	0	0	0	0	0	0	0	0	0	0	0	0	0	0	0	0	0	0	0	0	0	0
hsa-mir-1302-10	0	0	0	0	0	0	0	0	0	0	0	0	0	0	0	0	0	0	0	0	0	0	0	0	0	0	0	0	0	0	0	0	0	0	0	0	0	0	0	0	0	0	0	0	0	0	0	0	0
hsa-mir-1302-11	0	0	0	0	0	0	0	0	0	0	0	0	0	0	0	0	0	0	0	0	0	0	0	0	0	0	0	0	0	0	0	0	0	0	0	0	0	0	0	0	0	0	0	0	0	0	0	0	0
hsa-mir-1302-2	0	0	0	0	0	0	0	0	0	0	0	0	0	0	0	0	0	0	0	0	0	0	0	0	0	0	0	0	0	0	0	0	0	0	0	0	0	0	0	0	0	0	0	0	0	0	0	0	0
hsa-mir-1302-3	0	0	0	0	0	0	0	0	0	0	0	0	0	0	0.726588	0	0	0	0	0	0	0	0	0	0	0	0	0	0	0	0	0	0	0	0	0	0	0	0	0	0	0	0	0	0	0	0	0	0
hsa-mir-1302-4	0	0	0	0	0	0	0	0	0	0	0	0	0	0	0	0	0	0	0	0	0	0	0	0	0	0	0	0	0	0	0	0	0	0	0	0	0	0	0	0	0	0	0	0	0	0	0	0	0
hsa-mir-1302-5	0	0	0	0	0	0	0	0	0	0	0	0	0	0	0	0	0	0	0	0	0	0	0	0	0	0	0	0	0	0	0	0	0	0	0	0	0	0	0	0	0	0	0	0	0	0	0	0	0
hsa-mir-1302-6	0	0	0	0	0	0	0	0	0	0	0	0	0	0	0	0	0	0	0	0	0	0	0	0	0	0	0	0	0	0	0	0	0	0	0	0	0	0	0	0	0	0	0	0	0	0	0	0	0
hsa-mir-1302-7	0	0	0	0	0	0	0	0	0	0	0	0	0	0	0	0	0	0	0	0	0	0	0	0	0	0	0	0	0	0	0	0	0	0	0	0	0	0	0	0	0	0	0	0	0	0	0	0	0
hsa-mir-1302-8	0	0	0	0	0	0	0	0	0	0	0	0	0	0	0	0	0	0	0	0	0	0	0	0	0	0	0	0	0	0	0	0	0	0	0	0	0	0	0	0	0	0	0	0	0	0	0	0	0
hsa-mir-1302-9	0	0	0	0	0	0	0	0	0	0	0	0	0	0	0	0	0	0	0	0	0	0	0	0	0	0	0	0	0	0	0	0	0	0	0	0	0	0	0	0	0	0	0	0	0	0	0	0	0
hsa-mir-1303	0	0	0.286513	0	0	0.237715	0	0	0	0	0	0	0	0	0	0	0	0	0	0	0	0	0.572121	0	0	0	0.885202	0	0	0	0	0	0	0	0	0	0	0	0	0	0	0	0	0	0	0.114074	0	0.282115	0
hsa-mir-1304	3.83033	3.74752	0.909778	2.16012	0.876125	1.1724	0.664097	0.677277	0	0	0.459696	0	0.675559	0	0.726588	0	0.497633	0.856743	0	0	0	1.50806	0	0.578763	2.00942	0	0	0.495159	0	0	0.406994	0.627385	0.59822	0.837988	0.581218	0.84909	0	0.581993	1.36559	1.05884	0.219786	0.341756	0.532378	0.732515	0.485863	0.41047	0.194339	0.898329	0.970717
hsa-mir-1305	0	0	0	0.429697	0.273647	0.237715	0	0.484822	0	0	0	0	0	0	0	0	0	1.39061	0.627355	0.473115	0	0.691319	0	0.578763	0	0	1.42977	0	0	0	0	0	0	0	0.220789	0	0.958431	0	0	0	0	0	0.920387	0	0	0	0	0	0.310287
hsa-mir-1306	3.21783	2.13433	4.80847	4.94663	1.80996	1.95083	2.01042	2.43123	3.35148	3.40225	2.46023	1.29279	2.37309	2.53152	4.11836	2.93084	3.07281	4.35492	1.66854	1.89403	3.17692	4.18692	1.29873	4.23024	3.62624	4.04659	4.62741	3.43662	1.58908	3.00854	4.31494	3.0147	3.62113	5.02247	2.86475	2.92813	3.70851	2.45213	4.58205	2.70371	3.20602	3.70359	3.31125	3.26302	1.48641	1.65043	3.0625	3.36275	3.92194
hsa-mir-1307	11.2989	10.1959	11.5968	11.378	10.5752	10.8809	9.23976	10.9997	10.169	10.5949	8.88361	8.43022	9.85872	10.4839	10.2007	9.51465	9.77456	11.2893	10.2997	8.09921	10.7636	11.4029	8.12617	10.9579	10.6621	11.7012	10.8834	10.8277	9.04721	10.6999	10.9869	9.07183	9.79259	11.7783	10.5693	9.24848	10.3432	8.6168	10.9517	10.1542	9.28432	9.66293	10.3889	9.82491	7.35378	8.09328	8.94421	10.501	10.7998
hsa-mir-130a	7.00021	7.47737	6.3587	6.01879	6.14058	6.82414	6.10854	6.73937	6.05744	5.86877	5.66984	5.49443	5.517	6.02708	5.01911	5.36826	5.48094	5.68028	3.9734	5.35666	3.87523	5.21997	3.60813	6.05841	5.89803	5.03368	6.69334	5.05955	5.21546	5.83201	6.42188	5.67576	4.49708	5.63128	7.46723	6.50387	6.54877	6.75713	6.69095	5.52061	6.2518	6.16122	6.97435	6.31691	4.52502	6.09565	6.3404	6.73623	6.79933
hsa-mir-130b	5.27906	5.04855	5.41755	6.64714	5.76734	5.42942	3.65587	4.47046	5.00331	4.9239	3.08832	2.06696	5.37888	5.10738	5.44483	4.08846	4.09288	5.81107	4.43961	3.47128	5.77855	6.17616	2.96604	5.15177	5.08364	6.20331	6.40693	5.68273	3.24498	4.16968	7.11753	4.11627	5.16759	6.35501	5.5333	4.69166	4.90931	4.22676	5.96164	3.81737	4.20504	5.26385	5.51899	5.64251	2.67936	3.11304	4.64023	5.60676	5.75568
hsa-mir-132	5.57736	6.53902	7.74213	6.71065	5.92443	5.5666	7.01552	5.90961	6.92886	6.53755	7.50678	6.18251	6.90503	6.49966	7.92239	7.19189	7.54826	6.82936	5.40598	6.60362	5.36523	7.16615	6.11143	6.77591	6.98399	8.69288	6.57015	5.55033	6.45272	7.07133	6.56284	5.72116	5.9214	7.23994	8.07536	6.98657	6.33955	5.93764	7.43357	6.56607	7.01154	6.79953	7.47904	6.10449	6.62795	6.34527	7.22007	6.61113	6.90131
hsa-mir-1321	0	0	0	0	0	0	0	0	0	0	0	0	0	0	0	0	0	0	0	0	0	0	0	0	0	0	0	0	0	0	0	0	0	0	0	0	0	0	0	0	0	0	0	0	0	0	0	0	0
hsa-mir-1322	0	0	0	0	0	0	0	0	0	0	0	0	0	0	0	0	0	0	0	0	0	0	0	0	0	0	0	0	0	0	0	0	0	0	0	0.263444	0	0	0	0	0	0	0.290608	0	0	0	0	0	0.310287
hsa-mir-1323	0	0	0	0	0	0	0	0	0	0	0.459696	0	0	0	0	0	0	0	0	0	0	0	0	0	0	0	0	0	0	0	0	0	0	0	0	0	0	0	0	0	0	0	0	0	0.485863	0	0	0	0
hsa-mir-1324	0	0	0	0	0	0	0	0	0	0	0	0	0	0	0	0	0	0	0	0	0	0	0	0	0	0	0	0	0	0	0	0	0	0	0	0	0	0	0	0	0	0	0	0	0	0	0	0	0
hsa-mir-133a-1	2.83815	2.82835	2.96539	1.62373	1.52594	4.49152	5.58299	3.82585	5.05417	4.18829	6.6394	5.62733	3.47931	4.37923	2.3011	6.49896	6.53046	1.39061	2.09369	5.28666	2.54257	2.40689	1.55916	3.23123	4.42135	0.770352	2.95906	3.43662	1.3574	6.24071	4.49254	5.32994	1.61136	3.19189	3.07753	7.75198	3.12668	7.68576	6.24101	6.31443	6.60877	7.19123	4.41327	4.57428	3.9649	6.78916	8.11223	7.0431	3.26878
hsa-mir-133a-2	2.22978	3.22695	2.8382	1.45141	2.37217	4.56978	5.55403	3.4835	5.12725	3.78276	6.62301	5.53109	3.22666	3.87404	1.20754	6.2909	6.56224	2.5523	1.06313	4.85516	2.07639	2.83746	1.97094	3.07099	4.4466	0.770352	3.2434	2.75118	1.96394	6.04627	4.2669	5.2701	1.83562	3.23275	2.95981	7.50706	3.06297	7.44645	6.23095	6.17588	6.39691	7.08731	4.09316	4.81367	3.78801	6.62328	7.86251	6.77942	3.33889
hsa-mir-133b	1.15718	0.929102	1.67667	0.760351	0.503572	1.95083	3.69603	0.998941	2.48633	3.11404	5.23935	3.92696	2.19638	2.35013	1.20754	4.70718	5.28149	0.856743	1.39736	3.90417	1.38336	1.15673	1.29873	2.15542	3.94247	0	2.13359	1.95097	0.739437	5.35041	2.77959	4.11627	1.34571	2.22505	1.86629	6.42197	1.70649	6.36911	5.15035	5.02294	5.05545	5.44296	3.06422	3.3119	3.10568	5.51861	7.07332	5.40829	1.95585
hsa-mir-134	8.37204	8.06694	10.7945	9.40715	8.26003	7.24624	6.6326	8.44662	9.48319	9.02897	9.6205	7.62236	8.26664	10.1588	8.50407	8.24324	9.05174	9.52935	7.89786	8.98166	8.17877	8.80911	8.80356	8.73959	9.47605	9.10335	10.5975	8.84556	8.0279	7.92788	9.24605	9.824	7.51898	8.93376	9.42858	8.142	7.59271	7.21835	8.48618	8.73615	8.61833	7.90185	9.38325	7.63756	7.67818	7.57233	7.62076	8.38572	9.41055
hsa-mir-1343	1.65666	1.09093	0.909778	1.45141	0.701841	0.237715	0	0.484822	0	0	0.459696	0	0	0	0	0	0	0	0	0	0	0	0.572121	1.79404	0	0.770352	0.885202	0	0	0	0	0	0	1.36464	0.220789	0.263444	0.647008	0.412811	2.05438	0.577625	0.866159	0.849514	2.12013	0.732515	0	0.219784	0	0.282115	0.565507
hsa-mir-135a-1	0.386867	0.293986	0	0.429697	0	0.779466	0.338005	0.262681	0	0.712084	0.807771	0.659931	1.48111	0	0	1.25116	0.497633	0	2.09369	0	0	0	4.28502	0.578763	0	0	1.82418	0.495159	0.532417	0.500352	1.97573	0.627385	3.73686	1.74961	1.10942	1.38002	4.71576	1.2173	5.107	0.479139	1.21194	0.849514	1.08119	3.16002	0.485863	0.497126	1.00676	0.720654	0
hsa-mir-135a-2	0	0.293986	0.286513	0	0.701841	0.922669	0.545636	0.484822	0	0	0.807771	0.367374	1.13385	0	0.726588	1.25116	0	0	1.06313	0	0	1.15673	4.21113	0.578763	0.462865	0	0.885202	0.495159	0.920445	0	1.97573	0	3.84399	0.608844	1.10942	1.38002	4.82541	1.80098	5.88673	0.135506	0.729655	1.38061	0.290608	2.99025	0.678643	0.799516	1.20025	0.898329	0
hsa-mir-135b	6.52411	3.97191	5.618	7.53048	6.7762	7.25134	6.0716	6.80009	3.70975	7.57875	4.72885	3.6882	6.72127	6.63472	6.87701	5.29913	5.50731	7.13425	9.79678	3.7039	6.09945	6.94646	0.572121	7.82375	2.81812	5.3899	6.33307	7.10177	5.08873	5.39374	6.96028	7.22086	8.30607	5.50353	4.04831	3.17211	7.31189	3.45132	4.22461	3.95198	3.52756	3.67368	6.00345	4.57428	4.48688	4.58726	2.52572	6.03986	4.03184
hsa-mir-136	5.19676	5.75797	6.22526	5.37828	6.64385	6.07968	4.2918	6.3484	6.177	5.94547	5.58215	4.79079	5.60813	6.26352	5.23513	5.25809	5.34134	5.95002	4.87411	5.07042	4.90485	5.21997	5.75625	5.04797	6.48408	6.08831	7.15434	5.34764	5.10753	5.04094	5.67784	6.02861	4.46387	5.36336	6.026	5.23505	4.65225	4.72837	5.83009	5.23018	5.1454	5.20234	5.96273	5.56399	3.98328	4.09819	4.69747	5.47285	5.90758
hsa-mir-137	0	0	0	0	1.29984	0.237715	0.338005	0	0.655751	0	0.459696	0.659931	0	0	0	0.351701	2.23482	0	0	0.473115	0	0	1.29873	0	0.462865	0	1.42977	0.495159	0	0	0	0	0	0	0.41223	0.263444	0	0.995543	0	0.373436	0.729655	0.617859	0.532378	0.994435	0.263288	0.318275	1.37083	0.282115	0
hsa-mir-138-1	0	0	1.06932	0.429697	1.29984	0.779466	0.338005	0.262681	0	0	0	0	0.675559	1.24259	0	0	0.497633	0	0.627355	0.828799	0.851499	0	0	1.31075	1.70914	0	0.885202	0	0.532417	0.500352	1.39484	0	0	0.336305	0.99438	1.13884	1.0921	1.40946	0.433392	0.25937	1.10563	1.76794	1.22585	3.26302	0.263288	0.41047	1.59398	1.32874	0.310287
hsa-mir-138-2	0	0.293986	1.06932	0	0.876125	0	0.126884	0	0.655751	0	0.459696	0	0	0.751135	0	0	0	0	0	0	0	0.691319	0	0.578763	2.00942	1.26985	0.885202	0.495159	0.532417	0.500352	0.406994	0	1.01984	0.837988	1.21597	1.00123	0.249311	1.31658	0.232909	0	0.729655	1.04907	0.532378	1.86637	0.485863	0.114074	1.00676	0.898329	0
hsa-mir-139	4.21182	5.8903	4.64074	4.51462	5.2625	5.95608	5.85737	4.8757	5.62459	4.82991	6.53818	5.81738	5.47886	5.34414	4.76494	6.08923	6.51754	4.75223	5.58035	5.07042	3.51814	3.92024	4.00791	3.8406	3.94247	5.36542	5.6717	4.80866	3.91265	6.24859	5.70513	5.87639	3.94371	4.75432	6.6939	6.9473	4.5858	6.83664	5.94942	5.71165	6.58423	6.84384	5.08861	6.26822	5.52505	5.84201	7.07795	6.59511	4.86169
hsa-mir-140	9.54044	10.6253	9.38318	9.29449	10.147	10.1283	9.46417	9.20245	9.82087	8.88839	9.37356	9.47591	9.56656	9.27272	9.67612	9.06538	9.00161	9.43616	8.90634	9.36802	8.70621	9.79856	7.10606	9.0807	8.85919	9.53796	9.42079	8.46246	8.94247	8.8646	8.8523	8.15391	8.79254	9.1127	10.5282	10.024	9.87485	9.74346	9.78479	8.83061	9.63452	9.43065	9.85205	9.17043	10.4103	9.38504	10.2474	9.28611	9.1847
hsa-mir-141	10.3043	9.79648	10.6282	11.9363	10.9033	11.1869	9.80027	11.4702	10.0147	10.7717	8.3436	9.41837	10.967	9.8696	10.8296	8.42341	9.19753	10.4569	11.1431	9.16353	12.0657	11.7505	11.9923	10.4423	10.4452	10.9811	11.4308	10.8944	10.3898	10.2573	11.3977	9.45331	11.7714	11.0857	10.1107	9.80594	12.2266	8.89798	11.3376	9.15109	9.14701	10.8096	10.4875	11.8623	8.41768	8.72287	9.54792	10.31	11.6257
hsa-mir-142	10.1527	11.0362	12.3089	13.8222	10.3229	9.97425	11.1454	9.71898	12.2181	11.7012	10.3863	9.51131	12.5334	12.3203	14.1475	10.535	11.9132	12.2983	11.53	9.83208	11.8921	12.9285	8.73106	12.5315	12.5741	12.964	12.5299	10.7811	10.9321	11.9232	12.2048	11.9017	11.5032	12.9073	13.0392	11.4696	13.9554	11.5026	13.4873	10.5813	11.1629	12.4781	12.7995	12.7858	7.63669	9.75755	10.9095	12.6473	13.2277
hsa-mir-143	16.6588	16.9628	16.436	15.8958	16.221	16.5943	18.3997	16.1146	17.2695	16.7183	18.1807	18.0088	16.5003	17.7505	16.8266	18.1082	18.2905	16.2818	15.474	17.9905	16.171	16.0922	13.7784	16.8677	17.5457	16.5744	16.5445	15.3036	17.5105	18.5455	16.3256	18.2019	15.3526	16.1492	17.164	18.1942	16.595	18.7164	17.6883	18.4958	18.5463	17.28	17.1791	16.0576	19.1936	18.8014	18.4228	18.0962	16.8487
hsa-mir-144	7.79725	4.82521	8.02731	5.61115	5.85845	5.62537	2.9385	3.58302	5.92708	5.85292	6.75418	5.6935	7.75487	7.03113	6.63239	3.41444	7.73277	5.98738	8.43385	7.47238	5.15332	6.54247	3.60813	7.12611	5.37419	5.03368	4.16514	6.80166	5.1625	4.64642	5.67784	4.79147	6.68288	5.83741	6.85096	7.09202	5.11177	8.35742	5.95351	4.79116	5.99317	8.5392	5.1891	7.00388	3.20299	3.12669	9.29723	4.3067	5.06151
hsa-mir-145	11.6522	11.4634	11.8078	11.4957	10.4535	12.1667	12.2162	11.9422	12.5471	11.9774	13.6017	12.2022	11.3881	12.4938	10.6151	13.3375	13.5929	10.5843	10.066	12.5017	9.86242	10.9512	9.56388	11.8695	12.4045	10.4661	11.4414	10.7622	10.4437	13.696	12.0758	12.9208	9.69936	11.3792	11.5678	14.6431	12.4266	14.3981	13.2714	13.3152	14.067	13.9341	12.4009	12.5167	10.7356	13.3637	14.553	14.2675	12.9026
hsa-mir-1468	2.83815	2.87354	2.64905	3.27408	1.62695	2.07869	1.53248	1.58355	2.62736	1.82891	2.35833	2.254	2.67241	0	2.48105	1.6819	1.61328	1.7794	0	2.68559	2.32823	4.23481	3.05322	2.68465	2.56501	3.98362	2.38822	2.91679	1.47788	1.96418	5.79256	1.89678	3.28324	2.91895	3.57464	3.07255	2.07274	2.69289	2.83432	2.72536	1.79428	1.9783	2.12013	2.40598	2.07155	1.82809	2.87672	1.7552	2.12411
hsa-mir-1469	0	0	0	0	0	0	0	0	0	0	0	0	0	0	0	0	0	0	0	0	0	0	0	0	0	0	0	0	0	0	0	0	0	0	0	0	0	0	0	0	0	0	0	0	0	0	0	0	0
hsa-mir-146a	9.39578	9.85222	8.32484	10.904	6.78715	6.99797	7.42405	7.18376	7.26741	6.60531	5.30928	6.65894	8.75552	6.36266	8.44566	5.40632	6.18328	7.58174	7.4448	6.30394	8.27931	11.6673	4.93966	8.24348	8.07657	8.93883	9.63573	7.57431	6.65157	6.93623	7.54263	7.7561	7.97589	9.25028	8.3732	7.87651	8.90278	8.31453	8.80378	7.35738	6.42481	7.93846	7.72712	10.1267	8.07083	5.98005	7.40451	7.48874	8.71163
hsa-mir-146b	7.80322	8.9283	9.8049	10.3474	10.4028	9.18418	10.8005	9.37075	9.65161	8.61074	9.94495	8.48379	9.95735	9.99465	11.5967	8.51553	10.0249	10.5682	8.29563	8.58226	8.99256	9.55975	6.61257	10.9359	9.19523	8.84232	9.66763	8.53114	9.13114	9.21489	8.99736	8.84281	9.01948	9.91355	10.5074	7.95198	9.94057	7.82083	9.71402	8.43982	8.41077	8.4057	10.004	8.73707	9.09533	7.79444	7.55369	9.77181	10.9151
hsa-mir-1470	0	0	0	0	0	0	0	0	0	0	0	0	0	0	0	0	0	0	0	0	0	0	0	0	0	0	0	0	0	0	0	0	0	0	0	0	0	0	0	0	0	0	0	0	0	0	0	0	0
hsa-mir-1471	0	0	0	0	0	0	0	0	0	0	0	0	0	0	0	0	0	0	0	0	0	0	0	0	0	0	0	0	0	0	0	0	0	0	0	0	0	0	0	0	0	0	0	0	0	0	0	0	0
hsa-mir-147a	0	0	0	0	0	0	0	0	0	0	0	0	0	0	0	0	0	0	0	0	0	0	0	0	0	0	0	0	0	0	0	0	0	0	0	0	0	0	0	0	0	0	0	0	0	0	0	0	0
hsa-mir-147b	4.13814	3.5667	4.57578	3.46749	1.72135	1.81054	3.75995	1.92444	1.10492	2.27173	0	0.367374	3.02973	0.751135	3.34569	0	1.40467	2.08535	1.06313	1.11391	2.32823	4.90177	0	2.307	4.42135	4.2205	4.4709	0.863107	1.3574	0	1.39484	1.06317	2.73386	3.94846	1.65527	1.84977	3.21725	0.733401	3.61034	2.30425	0.866159	2.66584	1.35732	3.49234	0	0.219784	2.33274	2.08394	5.32598
hsa-mir-148a	14.7815	15.0691	15.4978	15.9245	14.839	14.7658	13.5717	13.8942	16.1315	15.0914	13.7477	14.3828	15.8765	14.6709	15.8776	14.1812	13.9569	15.3592	16.9529	15.3866	16.4601	15.732	17.6343	16.3411	14.7603	16.3952	16.1915	15.1829	14.7059	13.8295	15.7412	15.4262	16.4729	15.682	15.3794	16.0133	15.9842	15.8037	17.3569	14.0891	14.6791	17.7934	15.9135	18.1133	14.5666	13.4505	15.8482	15.7199	15.8433
hsa-mir-148b	6.94366	6.24438	8.08097	7.72992	6.88217	6.19704	6.45322	6.96368	8.12676	8.04399	6.0508	6.25003	7.54484	7.18805	8.0311	6.85258	6.89741	8.19446	9.01515	6.52676	7.30244	8.20686	7.23751	7.05292	7.60213	7.79363	8.17909	7.79518	7.47193	7.45216	8.45548	7.19964	8.17627	8.24643	6.9333	6.83279	8.16952	6.55341	7.9287	6.43428	6.67996	7.92742	7.91358	8.09741	5.96497	6.13334	6.72171	7.29402	7.72574
hsa-mir-149	4.84195	3.67279	4.67836	3.89511	3.51639	3.43986	3.26113	3.03376	3.26777	4.95392	3.21032	2.33915	2.8016	4.28126	2.09545	3.45132	4.22585	4.56721	2.42165	4.01221	2.07639	3.16862	3.2132	4.37453	3.71203	4.64347	4.67602	4.60526	2.50758	3.45278	6.69124	3.63691	2.02966	4.90097	3.7969	6.01141	3.74955	5.76822	3.12249	4.28643	4.19211	4.73664	4.62378	4.94341	2.58623	4.07724	6.71974	3.78058	5.39342
hsa-mir-150	7.80719	9.95895	9.07478	9.67118	8.94566	9.28993	9.64672	6.27961	9.47622	8.38974	8.67825	7.63294	8.98878	8.33426	9.6184	8.71636	8.77078	7.56948	7.67373	7.37455	8.19865	8.86343	4.7954	8.59792	8.8331	9.4136	9.18712	6.68018	7.78823	9.15844	8.87451	8.39244	8.7791	9.74504	11.8776	10.5184	11.2057	10.2293	10.1125	8.2675	9.97036	10.0003	10.655	10.0895	9.01275	8.77826	10.0235	9.84918	10.113
hsa-mir-151a	11.5158	10.8944	11.3939	11.0902	9.98133	10.6252	10.1244	10.5138	10.5906	10.9117	10.4414	10.3189	11.1725	10.9216	11.0739	10.3947	10.4009	11.8453	11.0727	10.3529	10.7854	12.117	8.59785	11.4217	11.2798	11.5238	12.1523	10.6538	10.913	10.8684	10.7	10.0661	12.0799	11.7763	11.8261	10.4782	11.1087	9.89471	11.4328	10.8356	10.405	10.1935	11.0596	10.4914	11.4086	10.1484	10.3285	11.1431	11.0958
hsa-mir-151b	0.943099	0.538086	1.67667	2.04354	1.17195	1.88239	0.832066	0.998941	2.15465	0.712084	1.08798	0.903046	1.7608	2.35013	1.85554	1.6819	0.86694	1.39061	2.26697	1.11391	2.07639	2.02637	0.572121	1.31075	1.86708	1.64018	3.2434	0.863107	1.22592	1.80213	0.983867	1.39741	3.42802	2.30386	2.31293	2.07226	2.31075	0.995543	1.71265	0.988978	1.21194	1.76794	1.22585	2.49332	1.26392	1.31094	2.1573	1.65982	1.65973
hsa-mir-152	7.92689	8.54141	9.01109	7.53318	7.24798	6.67785	6.71215	7.26655	7.77917	7.66746	7.58499	6.88815	6.91934	8.11363	7.41424	7.44142	7.07538	7.56948	6.36045	7.33348	6.0652	7.47115	6.59088	7.67838	8.24972	7.41845	8.06963	7.77104	7.09005	6.90663	7.75124	7.06525	6.3427	8.4012	8.34045	7.6201	7.16033	7.58108	7.85091	7.80134	7.48027	7.70891	8.58304	7.41518	8.81273	7.90604	7.63129	7.97088	8.46259
hsa-mir-153-1	1.91378	0.538086	0.525446	0	0.701841	2.50009	0.243505	1.37721	1.10492	2.7535	1.85868	1.85201	3.47931	2.35013	1.56762	1.07331	0.497633	1.39061	1.06313	2.16766	2.32823	3.26403	4.82047	0.990691	1.32947	1.93461	3.58632	2.91679	1.58908	2.24215	1.71433	1.89678	1.83562	1.63234	1.72909	3.10651	2.56184	2.36204	0.907669	1.79158	1.65044	2.78252	1.4778	4.84721	1.13833	1.10562	2.45159	0.898329	2.20142
hsa-mir-153-2	5.19676	3.69813	4.36123	4.44739	3.34906	5.36817	2.69715	5.3971	5.48327	5.61066	3.82108	4.6645	7.41455	5.52625	4.79927	4.30541	4.51289	4.35492	5.36842	4.83569	6.98279	8.67883	9.49451	5.32163	5.47579	6.5569	7.90605	8.49557	4.03554	5.42191	5.37205	6.07598	6.61644	6.16224	4.671	6.33871	6.82084	5.3547	4.43789	4.5876	4.86492	6.87045	4.8189	7.88169	0.263288	3.95245	5.28795	4.44186	5.63548
hsa-mir-1537	0.691626	0.293986	1.34359	2.46215	0.273647	0.441747	0.214479	0	0	0	0	0	0.675559	0.751135	0.726588	0.634248	1.16072	0	0.627355	0	0	1.15673	0	0	0.462865	1.26985	1.42977	0.495159	0.290631	0	0.724074	0.627385	0	1.95892	0.581218	0.486129	1.52927	0.412811	0.433392	0.373436	0.219786	0	0.532378	0.412258	0	0	0.194339	0.517984	0.565507
hsa-mir-1538	0	0	0.525446	0.429697	0.273647	0.237715	0.338005	0	0	0.712084	0	0	0	0	0	0	0	0	0	0	0	0.691319	0	0.578763	0.812745	0.770352	0	0.863107	0	0	0.406994	0.627385	0	0.336305	0	0.678994	0	0	0.433392	0.135506	0.578873	0	0.290608	0.732515	0.263288	0.114074	0.518636	0.282115	0.310287
hsa-mir-1539	0	0	0	0	0.273647	0	0	0	0	0	0	0	0	0	0	0	0	0	0	0	0	0	0	0	0	0	0	0	0	0	0	0.627385	0	0	0	0	0	0	0.766222	0	0	0	0	0	0	0	0	0	0
hsa-mir-154	2.83815	3.59396	4.46533	2.78621	3.73582	3.09139	2.34023	3.82585	3.35148	3.31243	3.82108	2.254	2.19638	3.87404	2.91594	2.93084	2.84367	3.62682	2.09369	2.7701	1.38336	3.26403	4.05091	3.07099	3.48716	3.01022	4.52498	2.56406	1.78865	2.10985	3.14112	2.80578	1.01984	3.01578	3.67144	3.90918	2.73534	2.99219	2.90352	2.54236	2.98396	2.60375	3.95467	3.40493	2.48668	2.54955	3.47171	2.86063	4.01052
hsa-mir-155	7.50653	8.82207	9.63034	9.92086	9.11227	7.8673	10.3419	7.98657	9.08955	9.03425	8.25953	7.79053	9.33003	9.23886	10.8543	7.90566	9.62078	9.44961	7.65825	8.09717	9.19223	10.0137	5.46979	9.92825	9.60499	10.3008	9.95299	8.34201	9.40633	10.6273	8.60184	9.2656	8.1634	10.1645	10.9194	9.79427	10.6412	10.5468	10.3364	8.03052	8.90353	10.1699	10.3266	10.3686	8.30347	8.31411	9.68009	10.0661	10.2254
hsa-mir-1587	0	0	0	0	0	0	0	0	0	0	0	0	0	0	0	0	0	0	0	0	0	0	0	0	0	0	0	0	0	0	0	0	0	0	0.220789	0	0	0	0	0	0	0	0	0	0	0	0	0	0
hsa-mir-15a	8.57532	7.17291	6.76643	8.36441	7.94369	8.26519	7.29258	7.15978	6.32931	6.61474	6.02609	5.54907	7.28243	6.67385	8.17204	5.51483	6.38872	7.35755	6.99297	6.01455	7.33874	7.85891	5.07079	7.32573	6.91783	7.6182	7.60709	7.32451	6.13765	6.4806	6.24099	6.28191	7.4055	6.96776	7.48466	6.05553	6.99522	6.18759	7.49651	5.85354	6.18158	6.55078	7.54604	7.38409	5.40748	5.06611	6.67565	6.98279	7.33779
hsa-mir-15b	9.32698	7.16384	8.67117	9.60716	7.62445	7.35915	6.97343	7.06829	6.94916	7.03548	6.60644	6.02438	8.35875	7.32956	8.5627	6.23912	7.05765	8.44665	8.22647	6.56274	7.58827	8.88235	5.37144	8.43052	7.90276	8.5399	8.68879	9.02523	6.68324	7.48924	7.31648	7.44939	8.30841	9.15783	8.54208	7.54934	8.16669	7.0786	8.9647	7.38909	7.12984	8.16495	8.64145	8.03692	6.85201	6.59531	7.79573	8.42161	8.66889
hsa-mir-16-1	9.56583	8.23221	8.963	10.2053	7.59826	8.01447	7.32176	7.4606	8.41641	8.82281	6.96819	6.55599	9.45682	8.72973	10.1122	7.30451	8.48593	9.60191	9.55285	7.19514	9.63612	9.84366	6.6826	9.43359	8.73019	9.60617	9.88483	9.7654	7.68406	8.10123	8.16078	8.48966	9.30262	8.98473	8.88459	7.61421	8.85009	7.73707	8.88354	6.69918	7.00231	8.51621	8.63903	9.08865	6.78549	6.46432	8.08338	8.23565	8.84031
hsa-mir-16-2	9.54698	8.18369	9.0894	10.2627	7.53305	8.00645	7.40203	7.57683	8.51047	8.93616	7.08444	6.46419	9.42082	8.70868	10.1959	7.38058	8.43704	9.55446	9.55807	7.24028	9.54895	9.87044	6.91564	9.38009	8.76071	9.57447	9.95422	9.77014	7.7135	8.25598	8.1706	8.54542	9.26817	9.07528	8.89114	7.56774	8.89651	7.76919	8.95251	6.73163	7.099	8.54746	8.69448	9.0719	6.92514	6.46567	8.18766	8.33259	8.76273
hsa-mir-17	10.7442	9.50309	9.4151	11.7977	10.4163	11.3593	9.1822	9.89603	9.05094	9.56823	7.75	7.63715	8.79485	8.89618	9.73826	7.98326	9.17611	10.2486	9.72523	7.73406	10.9657	10.6316	7.52739	9.24227	9.52576	9.92275	9.39924	8.9603	8.93854	9.19462	10.0661	7.56181	10.2652	9.94194	10.0564	8.36702	8.9259	8.06257	10.9144	7.85877	8.08763	8.38854	9.22386	8.60604	8.42274	7.12813	8.13609	10.1447	10.0938
hsa-mir-181a-1	9.85025	9.2668	8.67969	9.15042	9.22733	10.3261	9.62928	9.33907	9.55117	8.96039	8.32852	7.89441	9.16723	9.46068	9.86825	8.03884	8.51383	8.7617	8.33267	8.41189	7.71519	8.20386	7.4532	8.69389	8.22622	8.57769	9.22232	7.73544	8.46331	8.04799	10.8837	8.35212	7.44433	8.6693	9.47626	7.97514	9.8789	7.57483	9.73315	8.27623	8.36397	7.90828	10.3291	7.69626	8.15532	7.65357	7.91258	8.4908	9.05663
hsa-mir-181a-2	10.499	10.3278	9.70477	10.243	9.68121	10.9833	9.87722	10.4975	11.9584	9.52889	9.60042	9.38997	10.2369	10.3217	10.1601	9.82897	9.85119	9.59285	9.32308	10.107	9.50331	8.88798	8.46307	9.7379	9.48446	9.66127	10.8434	8.35109	10.2065	9.42001	11.3716	9.2592	9.37698	9.38553	10.8049	9.56355	10.2981	8.99437	10.9256	9.595	9.51274	9.03664	11.1447	8.76914	9.03604	9.02539	9.32474	9.48009	9.73694
hsa-mir-181b-1	7.81509	6.7597	6.67633	6.95615	6.54082	7.90012	7.63037	7.22093	8.11782	6.03243	5.53622	4.975	7.06158	7.61241	8.08427	6.34089	6.32344	6.19326	5.99195	5.82015	5.90013	5.84694	5.63432	6.41617	5.98676	6.54604	7.53645	5.62405	6.62572	6.14253	9.80941	6.38894	5.71108	6.91852	6.73704	6.01141	8.03177	5.40632	7.76171	6.16998	5.89285	5.88273	8.8037	5.36994	5.56221	5.16868	5.64882	6.47765	6.46505
hsa-mir-181b-2	7.6939	6.60416	6.20393	6.68655	6.56648	8.00343	7.63646	7.30896	8.10883	5.97504	5.41458	5.17354	6.61979	7.27334	7.28696	6.11819	5.74746	5.85215	5.44258	5.57205	5.57452	5.75139	5.46979	5.86428	5.5707	5.79019	7.14574	5.02368	6.4564	5.83201	9.74073	5.49588	5.79358	6.61279	6.60111	5.85041	7.82888	5.07171	7.24483	6.00943	5.78504	5.64912	8.56615	5.3349	5.36606	5.26752	5.52778	6.55591	6.32957
hsa-mir-181c	6.29468	6.91368	5.13142	6.19992	5.70517	7.31763	6.41324	6.53706	5.73781	6.55724	5.53622	5.80247	5.29358	6.25063	5.28443	6.00492	5.21904	5.06341	4.43961	5.67427	5.44731	5.35612	6.09097	5.68212	5.5707	6.01149	5.15898	5.63598	6.70501	5.05899	7.01219	5.3874	5.90911	5.79029	5.628	6.11929	6.34625	5.88199	5.78037	5.80354	5.53151	5.45179	5.92083	5.45942	5.75638	5.94964	5.95747	5.94189	5.72982
hsa-mir-181d	5.09658	4.03294	3.00541	3.92837	3.43515	5.89225	4.99155	5.06833	3.70975	4.50448	3.37592	3.09425	2.5305	3.5765	2.78502	3.62277	3.14176	2.5523	1.06313	3.90417	3.41312	2.95649	4.71747	3.93673	2.56501	3.77635	2.60458	3.97647	5.23269	2.24215	5.59271	3.50468	3.28324	3.52366	2.99015	3.46167	4.25621	2.76497	2.96955	3.46529	3.01366	3.37232	3.57708	2.57568	4.00143	3.67423	3.39468	3.66252	3.1951
hsa-mir-182	13.4667	12.8424	14.1541	14.3548	14.7261	15.2786	13.0337	15.0324	13.7645	14.9322	12.8767	13.322	14.8806	14.6449	13.922	12.0495	13.5447	15.8192	14.5625	14.2988	15.2177	14.0893	15.0852	13.655	14.2489	15.4521	15.8577	15.0765	13.8202	14.741	13.5488	15.1931	13.4529	15.4631	13.5006	13.1919	11.6855	12.4251	13.4377	12.9477	12.6977	13.0233	13.0564	13.6683	11.7837	10.4375	12.5888	13.8514	13.8817
hsa-mir-1825	0	0	0	0	0	0	0	0	0	0	0	0	0	0	0	0	0	0	0	0	0	0	0	0	0.462865	0	0	0	0	0	0	0	0	0	0	0	0	0	0	0	0	0	0	0	0	0	0	0	0
hsa-mir-1827	0	0	0	0	0	0	0	0	0	0	0	0	0	0	0	0	0	0	0	0	0	0	0	0	0	0	0	0	0	0	0	0	0.59822	0	0.220789	0	0	0	0	0	0	0	0	0	0	0	0	0	0
hsa-mir-183	12.1211	11.6134	13.3144	12.787	12.6023	13.4992	10.7737	12.8451	12.5147	13.8953	10.7977	11.0965	13.5539	13.4442	12.7598	10.8439	12.4515	15.2317	13.4395	12.1055	13.6589	12.708	12.9398	12.6068	13.4727	15.0091	14.7182	13.4616	12.5444	13.6908	12.5558	14.3984	11.7932	14.5472	12.7972	11.435	9.67362	10.1969	12.696	12.3722	11.1244	11.0926	11.7765	11.721	10.338	8.26518	10.5096	12.6992	12.8998
hsa-mir-184	0	1.09093	0	0.760351	0.273647	0.237715	0	0.847055	0.655751	0	0.459696	0.367374	2.37309	1.24259	1.20754	0.634248	0	0	0	0	0.851499	0	0	0	0	0	0.885202	3.89939	0	0.500352	3.24396	0.627385	0	0.608844	1.21597	0	9.21635	0.870418	0.433392	0	0.219786	0	0.532378	0.732515	1.37945	0.219784	0.657	0.517984	0.310287
hsa-mir-185	6.43974	5.91753	6.78379	6.68655	6.35454	5.72645	5.96074	5.65327	5.05417	5.93045	5.63758	4.71316	5.72677	5.29479	6.82797	5.53215	5.86427	6.55855	5.8356	5.86887	5.3368	6.55195	3.96359	5.59641	5.85153	6.16125	6.23913	5.83537	5.76982	5.19582	5.80943	4.61027	5.60845	6.13555	6.02966	4.80972	5.75509	4.43994	5.9205	4.8903	4.76369	4.92613	5.78146	5.68023	4.47394	4.5216	4.89219	5.66319	6.46112
hsa-mir-186	8.49273	8.08026	8.90467	8.5548	8.06567	7.8189	7.42427	8.02358	8.83343	8.69535	8.13796	7.52804	8.89598	8.67773	9.1826	7.79524	8.20099	9.01561	8.41095	7.73406	8.78461	9.62971	6.22843	8.58685	8.78318	8.9757	10.011	9.3758	8.24932	8.03437	8.75662	8.06866	9.01518	8.92755	8.48396	8.30897	8.57191	8.2151	8.91844	8.14185	7.89062	8.79239	8.98618	8.88974	7.17744	7.00415	7.89783	8.17872	8.96262
hsa-mir-187	2.3214	0	0.525446	0.760351	0.876125	2.19613	2.47111	1.48406	0.655751	1.18672	2.13003	1.73119	5.59036	4.33108	0.726588	4.36461	3.86716	1.39061	2.26697	0.828799	0	0.691319	1.97094	3.44246	0	0	2.13359	2.34901	0.290631	4.9276	1.71433	1.89678	0	0	0.41223	2.3805	4.4304	2.72938	0.609383	2.08739	2.30727	0.849514	1.35732	2.72749	0	1.72414	2.75873	4.06749	0.782292
hsa-mir-188	4.88764	2.34153	3.11921	3.89511	2.73101	2.58868	2.24156	2.3768	2.87377	2.61008	0.807771	0.903046	2.92017	1.24259	3.60054	1.25116	2.35585	3.3104	3.75796	0.473115	1.38336	3.16862	0.572121	3.23123	2.00942	3.53422	2.60458	3.32315	2.38966	1.16586	3.08681	1.39741	4.89605	3.99671	3.77963	1.38002	3.60047	1.49673	3.52508	2.21527	2.48741	1.65002	2.81254	2.40598	1.92712	1.79427	1.78718	4.01063	2.27479
hsa-mir-18a	6.08844	4.61508	4.72704	5.8381	5.1311	6.05268	4.68733	4.90484	3.88855	4.65824	2.35833	1.85201	4.37212	3.5765	5.07622	2.82241	3.90732	5.2594	3.92248	2.39757	5.27819	5.41966	2.55264	4.76336	4.931	5.52869	4.97695	4.01352	3.95479	4.6701	6.43824	2.56141	5.39602	4.62215	6.46999	3.46167	4.82541	3.7818	6.20034	2.92562	4.01253	3.64314	4.52935	4.67111	2.20283	2.58954	3.79013	5.98188	5.71672
hsa-mir-18b	2.13194	0	0	1.45141	0.273647	0	0.413983	0.262681	0.655751	0	0	0	1.13385	0	1.20754	0	0	0.856743	0.627355	0	0	1.79037	0.572121	0.578763	0.462865	0.770352	0.885202	0.863107	0	0.500352	1.85094	0.627385	0.59822	0	1.31518	0	1.86431	0.581993	1.15472	0.25937	1.10563	0.617859	0.532378	0.732515	0.263288	0.318275	1.00676	0.720654	1.28672
hsa-mir-1908	0	0	0	0.760351	0	0	0	0	0	0	0	0	0	0	0	0	0	0	0	0	0	0	0	0	0	0	0	0	0	0	0.406994	0	0	0	0	0	0	0	0	0.135506	0	0	0	0	0	0	0	0	0
hsa-mir-1909	0	0.293986	0.286513	0	0	0	0	0	0	0	0	0	0	0	0.726588	0	0	0	0	0.473115	0	0	0	0	0	0	0.885202	0	0	0	0	0	0	0	0	0	0.249311	0	0	0	0	0	0.290608	0	0	0	0	0	0
hsa-mir-190a	2.22978	1.48964	2.30871	2.63326	4.35219	3.5761	1.78426	3.34859	3.83137	2.27173	1.85868	2.8258	3.13155	2.69263	2.48105	2.10861	1.61328	2.5523	1.66854	2.5001	3.41312	4.28116	0.572121	1.31075	3.90652	3.13135	1.82418	3.43662	3.13932	3.15001	2.47583	2.09375	3.62113	3.61921	3.10552	2.80946	3.53154	3.61629	2.76164	1.87141	1.98626	3.03862	2.9851	4.07697	2.26424	1.53228	2.95929	2.77217	3.80297
hsa-mir-190b	0	0	0	0.429697	0.273647	0	0.243505	0.262681	0	0	0	0	0	0	0	0.351701	0	0	0.627355	0	0	0.691319	0.572121	0	0	0.770352	1.42977	0.495159	0.290631	0	0.406994	0	0	0.837988	0.581218	0	0	0.221121	0.433392	0.135506	0.219786	0.341756	0.532378	0.412258	0	0.114074	0	0.282115	0.310287
hsa-mir-191	10.8989	9.84231	10.1336	10.1697	8.31026	9.25863	8.15822	9.31891	8.94375	9.52889	7.86128	7.1927	9.50978	9.33661	10.0907	7.67372	9.10127	10.4503	9.85479	8.08279	10.0227	10.9818	9.09434	10.0548	9.90508	10.2532	10.1357	10.9875	7.84675	9.54296	9.42224	9.12347	10.3073	11.3838	10.2635	9.40034	9.99573	8.35961	10.2992	8.15637	8.56917	10.1699	9.71512	9.9304	7.60588	7.87097	8.87544	9.61813	10.784
hsa-mir-1910	0	0	0	0	0	0.237715	0	0	0	0.712084	0	0	0	0	0	0	0.497633	0	0	0	0	0	0	0.578763	0	0	0	0	0	0	0.406994	0	0	0	0.220789	0	0	0.221121	0	0.669814	0	0	0	0	0	0	0	0.282115	0
hsa-mir-1911	0.386867	0	0	0	0	0.237715	0	0	0	0	0	0	3.69424	0	0	0	0	0	0.627355	0	0	0	0	0	0	0	0	0	0	0	4.16574	0	0	1.63234	0	0	6.06253	0	0	0	0	0	0	0	0	0.114074	0	0	0
hsa-mir-1912	0	0	0	0	0	0	0	0	0	0	0	0	0	0	0	0	0	0	0	0	0	0	0	0	0	0	0	0	0	0	0	0	0	0	0	0	0	0	0	0	0	0	0	0	0	0	0	0	0
hsa-mir-1913	0	0	0	0	0	0	0	0	0	0	0	0	0	0	0	0.351701	0	0	0	0	0	0.691319	0	0	0	0	0	0.495159	0	0	0	0	0	0	0.220789	0	0.249311	0	0	0	0	0	0	0	0	0.114074	0	0	0
hsa-mir-1914	0.386867	0	0	0	0	0	0	0	0	0.712084	0	0	0	0	0	0	0	0	0	0	0	0	0	0	0	0	0	0	0	0.500352	0.406994	0	0	0.837988	0	0	0.249311	0	0.433392	0	0	0	0.532378	0	0	0	0	0.282115	0
hsa-mir-1915	0	0	0	0	0	0	0	0	0	0	0	0	0	0	0	0	0.497633	0	0	0	0	0	0	0	0	0	0	0	0	0	0	0	0	0	0	0	0	0	0	0	0	0	0	0	0	0	0	0	0
hsa-mir-192	16.011	15.5674	15.3185	15.716	15.2177	15.6135	12.2886	15.4553	14.7383	15.2902	13.8548	14.3005	14.9659	13.8057	15.3302	12.8913	13.4305	15.9119	15.7458	13.086	17.0782	16.6852	13.9744	14.3518	15.4532	15.785	14.9443	17.2585	15.3352	11.962	17.1998	12.2359	17.3374	16.1488	14.9938	14.9229	15.826	12.5129	15.3804	13.6511	12.9197	16.3962	14.4782	15.5198	12.8841	12.5891	14.8382	14.854	16.1754
hsa-mir-193a	8.08558	5.70894	8.39337	7.81016	5.93924	7.22048	6.64511	7.4606	6.70844	6.16665	6.41035	5.70156	6.83884	7.06096	7.14068	6.68851	6.78874	6.48209	7.81304	6.51456	4.09487	6.03452	5.11198	7.80477	6.80522	7.41248	7.86471	6.98071	4.86394	6.69781	6.41639	6.6538	5.18806	7.35545	6.76363	7.33157	7.70523	7.27035	7.13583	7.27814	7.13153	7.10982	7.62154	6.86341	6.36958	6.3569	7.51895	7.16101	7.51668
hsa-mir-193b	5.44102	4.01288	6.56692	7.76945	4.66883	5.70183	5.59295	6.00241	5.1033	6.2046	4.3047	2.99278	5.35802	6.01189	4.41253	4.34515	5.78026	6.52083	3.9734	4.17605	3.51814	4.84117	4.09266	7.81429	4.5666	6.04271	7.02895	5.33305	3.60392	6.34739	6.24099	5.76518	3.68016	5.53654	4.75292	6.17235	5.61218	5.5712	5.78037	5.44435	5.47392	6.59932	6.17811	6.19194	3.00133	3.7379	6.03248	6.97042	7.32057
hsa-mir-194-1	13.8846	12.9671	12.2959	12.1913	13.4189	13.3522	10.5232	12.84	12.2219	12.7544	11.9419	12.5229	12.8909	11.7086	12.7287	10.7835	11.1288	13.7087	13.5226	11.2028	14.4066	14.3284	10.7693	11.6467	13.1444	12.9095	12.3368	14.7366	13.4386	10.1055	14.6122	9.93655	14.5573	13.0582	13.4888	12.7751	12.7794	10.2968	12.0452	11.6409	11.0755	13.283	12.0411	12.0818	10.9715	11.0104	12.8907	12.3896	13.1875
hsa-mir-194-2	14.0548	13.1807	12.4165	12.3032	13.6537	13.6768	10.7862	13.0949	12.4024	12.898	12.047	12.6006	13.0118	11.824	12.8776	10.9421	11.2158	13.8329	13.6094	11.3362	14.544	14.4893	10.9007	11.7627	13.229	13.0333	12.4677	14.8713	13.5462	10.1249	14.7028	9.99239	14.6104	13.2337	13.495	12.8259	12.9183	10.5138	12.2233	11.7678	11.1746	13.3293	12.217	12.2994	11.0311	11.0705	12.9416	12.5284	13.2475
hsa-mir-195	5.60497	6.92982	6.19962	4.27712	4.96738	5.55566	4.93843	3.99801	5.5732	4.46333	5.93169	5.55798	5.05526	5.41515	4.76494	5.62384	5.15377	4.10592	4.36529	5.2131	3.51814	4.71178	3.66459	4.5057	5.25062	4.10692	5.01524	4.21781	3.80159	5.16281	5.2903	4.70371	4.08145	4.78211	7.78537	6.33513	5.50839	7.37627	5.67052	5.1201	6.37419	6.05502	5.81043	6.32884	7.18142	6.70064	6.68377	5.71156	4.41927
hsa-mir-196a-1	9.68004	6.27418	8.5978	2.26797	3.66632	4.87291	4.82506	5.11064	7.66108	7.06328	2.88348	5.99844	1.7608	6.42133	3.03596	5.58288	3.07281	4.56721	1.06313	2.99745	5.91943	5.96523	0.572121	6.80167	6.75558	5.06443	5.38049	6.26983	6.31393	6.76534	8.0516	4.20417	5.69685	8.63255	4.76174	3.80964	7.90352	0.581993	2.17122	3.97023	5.71897	3.0848	5.72779	1.21603	2.67936	2.89099	3.03738	6.54927	6.2084
hsa-mir-196a-2	9.81176	6.41458	8.83073	2.16012	3.78036	5.31723	4.90249	5.19171	7.96673	7.3095	3.42714	6.31453	1.13385	6.73989	4.06292	5.90211	2.92416	4.87691	2.42165	2.84993	6.09945	5.95096	0	6.91811	6.92683	4.86925	5.64752	6.52846	6.54526	7.12373	8.25152	3.81499	5.88423	8.83852	4.87989	3.90918	8.03696	0.581993	2.33046	3.99717	5.66851	3.40908	5.75189	1.99164	3.20299	2.58954	2.81893	6.74207	6.2903
hsa-mir-196b	10.5725	9.29459	11.1354	5.48272	5.65223	9.16765	4.5486	8.60596	9.52097	10.3538	4.1302	5.02726	4.41314	9.88948	3.88256	6.12961	7.74667	11.817	3.5046	5.5363	8.35923	10.5588	2.55264	8.53212	9.99178	9.56106	7.26176	9.34525	7.92964	8.60219	12.5376	8.71398	11.5494	12.1445	8.37751	6.90451	9.64229	3.23994	4.62365	9.15009	6.44947	5.17057	10.8142	3.92818	4.95567	4.07019	2.95929	10.0568	10.2455
hsa-mir-197	9.43669	7.49374	9.4011	9.21922	7.63662	8.04316	7.01332	7.63452	8.45003	8.10879	6.94201	5.77217	7.83252	8.09573	7.6814	6.8422	7.89634	8.66124	7.68523	6.70906	7.7041	8.66797	6.0278	8.74624	8.15333	8.54536	8.40137	8.73622	6.16483	7.43843	8.42571	7.20497	8.08639	9.06188	8.27649	8.25322	8.25129	7.67177	9.12359	7.14494	7.75433	8.84952	9.22117	8.39827	6.16741	6.30079	8.22012	8.45218	9.33484
hsa-mir-1972-1	0	0	0	0	0	0	0	0	0	0	0	0	0	0	0	0	0	0	0	0	0	0	0	0	0	0	0	0	0	0	0	0	0	0	0	0	0	0	0	0	0	0	0	0	0	0	0	0	0
hsa-mir-1972-2	0	0	0	0	0	0	0	0	0	0	0	0	0	0	0	0	0	0	0	0	0	0	0	0	0	0	0	0	0	0	0	0	0	0	0	0	0	0	0	0	0	0	0	0	0	0	0	0	0
hsa-mir-1973	0	0	0	0	0	0	0	0	0	0	0	0	0	0	0	0	0	0	0	0	0	0	0	0	0	0	0	0	0	0	0	0	0	0	0	0	0	0	0	0	0	0	0	0	0	0	0	0	0
hsa-mir-1976	3.51813	2.68359	4.0719	4.51462	3.15974	3.68057	2.78168	2.88569	2.75582	3.48681	2.46023	1.96349	3.31589	3.49143	3.43574	2.19813	2.75842	4.41099	3.9734	2.5001	3.51814	2.70771	1.29873	3.68321	3.16089	4.16482	1.82418	2.75118	1.87896	2.76635	2.38873	3.0147	2.61788	3.73751	3.6526	3.38073	3.40879	2.49515	3.03268	2.44135	3.42076	3.44494	3.06422	3.53413	1.76661	1.82809	3.35456	2.98391	3.6733
hsa-mir-198	0	0	0	1.45141	0.273647	0	0	0	0	0	0	0	0	0	0	0	0	0	0	0	0	0	0	0	0	0	0	0	0	0	0	0	0	0	0	0	0	0	0	0	0	0	0	0	0	0	0	0	0.565507
hsa-mir-199a-1	10.6891	10.9969	11.5723	10.135	10.6989	10.3287	9.78464	11.1176	10.886	10.9916	10.0569	9.60455	9.95735	10.9206	10.1617	10.6768	10.1973	10.6085	9.27569	10.0169	8.85647	9.68139	7.4731	9.94929	10.5065	10.4617	11.1868	9.55219	10.5366	10.0037	10.3078	10.5988	9.12149	10.5419	10.7861	9.2279	10.0983	9.47255	10.2128	10.2938	10.2661	9.50365	10.992	8.9421	9.9174	10.0881	9.38448	10.4203	11.2221
hsa-mir-199a-2	11.4485	11.6623	12.407	10.9571	11.3422	10.9876	10.5835	11.6356	11.6829	11.809	10.726	10.4365	10.8411	11.7916	11.1056	11.4589	11.0271	11.3781	9.99231	10.7396	9.80649	10.6372	8.16583	10.7425	11.3338	11.3455	11.9516	10.2885	11.3873	10.8981	11.1625	11.443	9.99575	11.4242	11.5449	9.85919	10.8822	10.1526	10.9145	10.9847	10.8936	10.2946	11.6198	9.68699	10.6208	10.7764	10.0701	11.1577	11.9702
hsa-mir-199b	11.897	12.0385	12.837	11.4373	11.6122	11.251	10.9772	11.7503	12.0064	12.2932	11.1145	10.829	11.2321	12.2014	11.5894	11.8051	11.3993	11.8639	10.4095	11.0315	10.2833	11.13	8.49651	11.1029	11.729	11.8698	12.3382	10.6405	11.8757	11.2879	11.6222	11.8904	10.5039	11.8908	12.0734	10.2078	11.3239	10.4428	11.1996	11.2471	11.1371	10.7338	11.7973	10.1999	10.9735	11.0866	10.3685	11.5272	12.3785
hsa-mir-19a	5.83224	3.86407	4.69069	7.42957	6.25152	7.35758	5.26364	6.10225	5.26316	5.553	4.64479	3.65537	5.13098	4.78876	6.30217	3.33773	4.58893	6.33043	5.20759	3.5209	7.15553	6.86511	5.13215	5.88852	5.46347	5.73392	5.54656	5.14551	4.99087	4.96637	6.63084	3.43372	6.43983	4.79581	5.77467	3.5383	4.8633	4.0505	6.26092	3.28755	3.66492	4.22046	4.72464	5.35835	2.67936	2.20799	3.61443	5.83678	5.54199
hsa-mir-19b-1	7.34671	6.0115	5.88795	8.92698	7.21996	8.36498	6.18205	6.85588	6.04493	6.39167	5.00656	4.86445	5.8059	5.88423	6.66998	4.75221	5.65614	6.75548	6.5817	5.00217	7.74795	7.47614	5.90428	6.36525	5.75378	6.33526	6.31783	6.32245	5.71571	6.20061	6.96028	4.40301	7.16326	6.54545	7.31074	6.11095	6.23864	6.0537	7.4909	4.70118	5.32196	5.90221	6.4002	6.94313	5.18735	4.13918	5.48661	6.87543	6.98021
hsa-mir-19b-2	7.20053	5.89578	5.72972	8.54679	7.15167	8.20779	6.20228	6.81808	5.81357	5.94547	4.66627	4.52608	5.83638	5.52625	6.50298	4.56299	5.48094	6.77698	6.27169	4.9668	7.41551	7.35677	5.66232	6.15151	5.58214	6.23068	5.87277	6.15016	5.6142	5.5803	6.79651	4.57773	7.08897	6.35038	7.14364	5.91889	5.9787	6.0537	7.2859	4.65117	5.37441	5.93409	6.20017	6.87566	5.22645	4.11198	5.57218	6.8965	6.66932
hsa-mir-200a	12.422	10.9472	11.4741	11.7101	11.6698	10.9787	9.45449	11.5134	10.8983	11.0269	9.13443	10.3851	10.4915	10.5159	11.2706	9.10353	9.54007	11.6545	10.9277	9.54933	12.1036	12.2444	5.57664	11.6339	11.6788	12.2221	11.8022	11.7137	10.3199	9.41213	9.87197	9.78622	11.8393	12.3248	11.2817	9.93615	11.0104	9.05673	10.8021	8.48255	9.74378	10.6715	10.6387	11.7471	8.06653	7.81672	9.57272	9.79444	10.9498
hsa-mir-200b	11.621	10.4419	10.7102	11.2134	11.344	10.9914	9.47558	10.888	10.1109	10.6624	8.90748	9.77946	9.85593	9.74076	10.4761	8.09089	8.44559	11.1361	10.3226	9.29235	11.4962	12.0773	5.53181	11.2461	11.3925	11.7257	11.3185	11.5057	9.33733	9.11596	9.6847	9.00914	12.1732	12.2924	10.9219	10.3476	10.1225	8.84804	10.424	8.42997	9.3385	10.6889	10.5117	11.7088	8.9673	7.67173	9.69095	9.66148	11.0027
hsa-mir-200c	12.3539	12.5419	13.259	13.5796	13.3774	13.6544	12.1774	13.7709	12.8097	13.1424	11.2472	12.132	13.8256	11.8974	12.3931	11.1619	11.4851	13.0247	13.571	12.0594	14.0454	13.4675	13.5381	12.4347	12.9375	13.2202	13.1268	13.0082	12.2926	12.8102	13.7682	11.7537	13.7672	13.774	12.6809	12.9054	13.605	11.3471	13.2394	12.1845	11.4808	13.0726	12.7006	13.8138	12.4125	11.0844	12.4027	12.5475	13.6726
hsa-mir-202	0	0.746801	1.21296	0.429697	1.89343	0.779466	0.243505	0	0.655751	0	0.459696	0.903046	0	0.751135	0	0	0	0.856743	0	0.828799	0	0	0	0	0	0	0	0.495159	0.290631	0	0.406994	0	0	0.837988	1.86629	0.84909	1.21442	2.76497	0	0.838204	1.4036	0.617859	1.4778	1.99164	0.848674	0.578869	1.28806	0.898329	0.782292
hsa-mir-203a	13.4013	12.4767	13.6911	12.8701	13.4305	14.2346	11.5495	13.3084	14.4723	15.106	12.7161	14.3152	13.1426	13.9969	14.5718	11.608	12.043	10.3309	15.279	12.6237	14.3579	14.1695	8.32319	13.5847	14.9689	15.1813	14.2987	15.6804	13.0188	12.1836	12.3171	13.6502	14.6444	14.1542	11.9696	11.9512	10.0599	12.0437	12.7112	11.7447	11.1775	12.4988	10.7472	13.6485	10.7901	10.1225	11.4353	13.4262	14.7012
hsa-mir-203b	5.79277	6.26573	8.02	7.32106	6.36554	7.4298	1.36963	8.62286	8.81327	8.48533	6.27008	7.31072	7.22023	7.48067	3.52049	6.08923	5.79104	4.41099	8.75813	6.59206	7.79574	8.34692	2.87326	8.14629	9.2174	9.81272	8.87729	8.28823	7.12737	7.08461	8.04449	7.69293	6.85285	8.45723	6.07283	6.04244	4.29831	6.98172	3.4109	4.21172	4.95187	6.1063	5.11672	7.7941	3.2644	2.92265	5.96748	5.96701	7.72737
hsa-mir-204	1.50858	2.20676	3.04435	0.760351	1.80996	1.05293	2.81008	0.998941	2.98281	0.712084	1.85868	1.45419	1.99497	2.35013	0	1.25116	1.16072	0	1.06313	2.5001	0	1.79037	1.7797	1.57254	1.86708	0	3.10822	1.60757	0.290631	0.871148	1.20394	0	3.42802	2.22505	2.40589	4.05542	2.46658	3.9145	2.96955	2.63676	3.23152	4.17848	5.34773	6.61345	1.8491	3.6835	4.30349	2.15563	0
hsa-mir-205	1.65666	1.09093	2.4313	3.05067	0.701841	1.48091	4.99892	0.677277	3.35148	1.18672	0	0	0	4.28126	0	1.80098	0	0	0	0	0	0	0	0	0	0	0	0.495159	0.290631	0.500352	2.77959	0	0	1.03568	1.21597	0.486129	0.647008	0.581993	4.40247	0.25937	0	1.38061	0	1.21603	0	0.219784	0.518636	0.282115	1.28672
hsa-mir-2052	0	0	0	0	0	0	0	0	0	0	0	0	0	0	0	0	0	0	0	0	0	0	0	0	0	0	0	0	0	0	0	0	0	0	0	0	0	0	0	0	0	0	0	0	0	0	0	0	0
hsa-mir-2053	0	0	0	0	0	0	0	0	0	0	0	0	0	0	0	0	0	0	0	0	0	0	0	0	0	0	0	0	0	0	0	0	0	0	0	0	0	0	0	0	0	0	0	0	0	0	0	0	0
hsa-mir-2054	0	0	0	0	0	0	0	0	0	0	0	0	0	0	0	0	0	0	0	0	0	0	0	0	0	0	0	0	0	0	0	0	0	0	0	0	0	0	0	0	0	0	0	0	0	0	0	0	0
hsa-mir-206	0	0.293986	0.730372	0.429697	0	0.237715	0	0.847055	0.655751	1.54325	0	0.903046	1.13385	0	1.20754	0.351701	0.497633	0	1.06313	0.828799	0.851499	1.79037	0	0.990691	0	0	0.885202	0	0	0	1.56341	0	0.59822	0	0.220789	1.00123	0	0.995543	0	0.135506	0	0.849514	0.532378	1.40808	0	1.15976	3.33408	0	0
hsa-mir-208a	0	0	0	0.429697	0	0	0	0	0	0	0	0	0	0	0	0	0	0	0	0	0	0	0	0	0	0	0	0	0	0	0	0	0	0	0	0	0	0	0	0	0	0	0	0	0	0	0	0	0
hsa-mir-208b	0	0	0	0	0	0	0	0	0	0	0	0	0	0	0	0	0	0	0	0	0	0	0	0	0	0	0	0	0	0	0	0	0	0	0	0	0	0	0	0	0	0	0	0	0	0	0	0.282115	0
hsa-mir-20a	9.40759	8.40473	7.39389	10.4465	9.56747	10.7893	8.21407	8.93864	7.5503	8.20865	6.55555	6.4403	7.23174	7.31106	8.3848	6.49896	7.39075	8.64087	8.26785	6.43267	9.55359	9.0919	7.02212	7.76604	7.81339	8.38711	7.48281	7.48809	7.61839	7.76145	8.64828	6.1772	8.81576	7.86134	8.7246	6.88263	7.36898	6.79636	9.25143	6.10335	6.55928	6.85054	7.57503	7.20809	6.26078	5.67549	6.82808	8.48037	8.33547
hsa-mir-20b	5.70192	1.97757	4.2656	2.78621	2.7757	2.40571	2.38519	3.13562	2.75582	2.7535	3.78226	2.70267	2.92017	2.1426	2.64103	3.68602	4.02149	1.7794	6.59802	2.03732	1.38336	1.79037	2.55264	5.28558	1.86708	2.73237	4.2317	2.99297	1.78865	3.00854	5.89093	2.56141	2.20067	1.74961	2.69092	3.00215	5.89885	3.36117	2.42762	2.36067	3.1267	4.13525	1.78857	3.10562	0.848674	2.80868	3.91949	3.53392	1.54579
hsa-mir-21	17.7813	18.277	17.7805	18.2054	18.4899	18.1589	18.4701	18.5451	17.9737	18.3281	18.0976	17.7447	18.3657	18.225	18.5086	18.2135	18.1708	18.2162	18.039	18.1574	17.8703	18.1492	15.5563	18.5303	18.318	17.8093	17.931	17.6704	18.5093	17.5428	17.395	18.0644	18.0832	17.1257	17.1497	15.5286	18.0909	16.1612	17.1771	17.7234	17.5197	16.1663	18.2393	16.6372	16.4991	17.2604	15.7497	17.8191	17.8455
hsa-mir-210	9.50546	6.62743	11.6218	12.0098	8.17188	7.42379	7.76586	10.2881	8.38695	11.9142	6.35851	5.38855	6.91934	10.0431	8.58501	6.20713	8.43361	11.984	9.88087	6.21629	11.1628	10.316	5.22894	10.3547	10.229	11.4944	11.4165	9.59483	6.13307	8.72882	10.64	9.02583	11.0177	11.1446	5.11146	6.96128	9.31834	5.74167	9.79507	7.04305	6.01903	9.23206	8.27853	9.20157	1.48641	3.6835	6.45154	9.30052	11.8919
hsa-mir-211	0	0	0	0.429697	0.273647	0	0	0.484822	0	0	0	0	0	0	0	0	0	0	0.627355	0	3.95222	0	0	0	0	0	0	0	0	0	0	0	0	1.50469	2.05034	0	0	0	0.433392	0	0	0	0.290608	0.412258	0	0	0	0	0
hsa-mir-2110	2.5658	0.929102	2.54428	1.45141	1.80996	1.65512	1.11713	0.484822	1.72323	1.54325	1.32251	0.659931	0.675559	1.24259	0	2.28241	1.7955	2.33763	1.66854	1.35186	0.851499	1.79037	1.29873	1.79404	1.09412	2.17901	1.82418	2.22814	0.290631	1.16586	2.63569	0.627385	2.02966	2.05319	0.99438	0.84909	1.52927	0.995543	1.26401	0.838204	1.31095	1.65002	0.532378	1.40808	1.48641	0.497126	1.28806	1.7552	1.54579
hsa-mir-2113	0	0	0	0	0	0	0	0	0	0	0	0	0	0	0	0	0	0	0	0	0	0	0	0	0	0	0	0	0	0	0	0	0	0	0	0	0	0	0	0	0	0	0	0	0	0	0	0	0
hsa-mir-2114	0	0.929102	0.909778	0.429697	0	0.237715	0.111221	0	0	0	0	0	0.675559	0	0	0.870418	0	0	0.627355	0	0	0	0	0	0.462865	0	0	1.39939	0	0.500352	0.983867	0	0	0	0.869361	0.263444	1.0921	0.221121	1.03648	0.135506	0	0.341756	0	1.21603	0	0.866154	0.518636	0	0.310287
hsa-mir-2115	1.50858	0	1.06932	0.429697	0	0	0.126884	0.677277	0	0	0	0.367374	0	0.751135	1.56762	0	0.86694	0.856743	1.06313	0	0	1.15673	0	0	0	2.57041	0	0.495159	0.290631	0	0	0	0	0	0.581218	0	0.46182	0	0	0	0.219786	0	0	0	0	0	0	0.282115	1.42206
hsa-mir-2116	0.943099	0.746801	1.21296	1.62373	0	0.237715	0.426694	0.484822	0.655751	1.54325	0.807771	0.367374	0.675559	0.751135	2.09545	1.55211	0.497633	1.39061	0	0.828799	0.851499	1.15673	0	0.990691	1.86708	1.26985	0.885202	0	0.290631	0	0	1.06317	0.59822	1.50469	0.869361	0	0.811106	0.221121	1.71265	0.479139	1.49066	1.04907	0.290608	0.412258	0	0.318275	0.518636	0.517984	2.12411
hsa-mir-2117	0	0	0	0	0	0	0	0	0	0	0	0	0	0	0	0	0	0	0	0	0	0	0	0	0	0	0	0	0	0	0	0	0	0	0	0	0	0	0	0	0	0	0	0	0	0	0	0	0
hsa-mir-212	2.40755	2.46479	4.28199	2.26797	2.31276	2.01618	3.32257	1.84647	2.75582	3.00358	3.42714	2.16351	2.37309	3.08988	4.49862	2.57753	3.38868	2.33763	2.26697	2.28719	1.77109	2.95649	2.96604	2.56941	3.62624	5.61432	3.58632	2.66065	2.81265	3.3971	2.55797	2.56141	2.73386	2.96818	4.21174	2.92813	2.6512	2.10862	3.78553	2.61373	3.44276	2.94157	3.63005	2.21364	3.35187	2.70326	3.15882	2.67794	3.61798
hsa-mir-214	6.01487	5.76997	5.94566	4.94663	5.54013	4.93336	4.997	6.04667	5.07895	4.82991	4.48474	3.40192	3.75932	5.29479	4.00527	4.82428	5.08541	4.66268	4.02259	4.20669	1.77109	3.59283	1.7797	4.5057	5.13113	4.42391	5.12437	3.73165	4.09327	4.6701	4.42847	4.70371	2.8412	5.45255	6.32278	4.79938	5.06376	4.84936	5.27309	5.33597	5.66384	3.99717	7.0661	4.74415	5.25698	5.27979	4.7755	5.7234	6.64876
hsa-mir-215	10.6527	9.97686	10.1901	9.81092	13.2335	10.198	5.84116	9.16027	8.99509	10.5179	8.57414	8.6822	9.30709	9.56845	10.4959	6.22321	9.47141	12.4791	9.67228	6.26806	11.9766	11.6384	7.35797	8.8548	11.8628	10.539	8.63447	13.5107	9.48706	6.24071	13.0038	7.53663	13.1116	9.71291	14.1924	12.0587	11.2509	6.22641	6.85278	6.57205	8.32527	12.4118	7.55462	8.79515	9.9411	7.54398	12.1019	10.0216	11.7131
hsa-mir-216a	0.691626	2.13433	2.24328	0	1.03161	1.65512	1.13273	0.847055	2.33	0	1.70111	2.56805	1.13385	1.90013	0	2.28241	0	0	0	2.5001	0	1.15673	0	0.578763	1.70914	0.770352	0.885202	0.863107	0.290631	1.16586	1.56341	1.39741	1.34571	1.03568	0.99438	1.13884	1.78756	0	1.46049	1.57025	1.57276	0.341756	1.78857	1.40808	1.58598	2.96887	1.84623	0.517984	0.310287
hsa-mir-216b	0	0.293986	1.34359	0	0.876125	0.237715	0.126884	0	0	0	0.459696	0.367374	1.13385	0	0	0.351701	0.86694	0	0	0.828799	0	0	0	0	0.812745	0	0	0.863107	0.532417	0.871148	0.406994	0	0	0.336305	0.220789	0	1.86431	0	0	0	0.219786	0.341756	0	0.732515	0	0.318275	0.194339	0.282115	0
hsa-mir-217	5.61406	7.59841	6.63228	3.22139	7.07105	6.38192	5.64737	5.47042	7.5679	3.64236	6.39113	7.11334	5.74295	6.02708	2.91594	5.85472	5.08541	4.70815	5.14233	6.61509	1.77109	3.92024	2.55264	4.62593	6.323	3.24309	5.2581	4.85022	4.47259	5.09443	6.3886	3.81499	2.73386	5.13453	5.92752	4.17225	6.27424	3.833	6.45204	5.55728	5.78934	4.13525	6.22621	4.89611	4.91795	7.56168	6.21158	4.13998	3.50055
hsa-mir-218-1	2.5658	4.21954	4.45091	3.89511	4.8677	3.36659	4.13688	2.72067	4.95059	3.91071	5.22495	4.92079	3.47931	4.33108	2.48105	4.08846	4.19374	1.7794	1.66854	4.29491	1.38336	2.40689	2.87326	3.23123	4.89477	2.87797	5.19278	3.89939	2.85776	3.74811	4.89147	3.0147	2.02966	2.7033	6.24313	4.91885	4.7865	5.65895	5.35566	4.04098	5.21736	4.73664	6.84869	3.797	4.17136	5.19808	5.72159	4.27486	3.23241
hsa-mir-218-2	2.22978	4.3045	4.31421	4.11326	4.77169	3.43986	4.10916	3.03376	4.71804	3.40225	4.68743	4.69712	3.31589	4.28126	1.85554	3.55661	4.02149	1.7794	2.80571	3.86628	1.77109	2.22914	2.7741	3.88946	4.4958	2.73237	4.62741	3.59166	2.85776	3.74811	4.82666	2.56141	2.02966	3.27249	6.10091	4.93784	4.53974	5.56617	5.107	3.80726	4.93645	4.51844	6.71412	3.6527	4.27943	5.02295	5.63632	4.32236	2.94836
hsa-mir-219a-1	3.11915	1.36858	1.67667	1.91671	2.6849	2.30472	0.600484	1.67661	1.72323	0	1.32251	0.903046	1.7608	1.90013	1.56762	1.07331	2.10271	2.5523	2.56134	1.35186	1.77109	3.59283	0.980694	0.990691	1.86708	2.38795	1.42977	1.39939	1.22592	2.10985	2.09058	1.66859	1.34571	2.86798	2.16117	1.26447	2.00656	1.11068	2.22628	0.838204	0.866159	1.87695	1.22585	2.10691	1.48641	1.04938	1.44911	2.00851	2.3446
hsa-mir-219a-2	0.691626	0	0	0	0	0.441747	0	0	0	0	0	2.8258	0	0.751135	0	0	0	0	0	0.473115	0	0	0	0	0	0	0.885202	0.495159	0	0.871148	0.406994	0	0	0	0.220789	0	0.249311	0.870418	0	0.25937	0.219786	0	0	0.994435	0	0	0	0	0
hsa-mir-219b	0.386867	0.746801	0.525446	0.429697	0.701841	0.441747	0.413983	0.262681	1.10492	0.712084	0.459696	0.367374	0.675559	0.751135	0.726588	0.351701	0.86694	2.5523	0	0.473115	0.851499	0.691319	0	0.990691	1.09412	1.26985	0	0	0.920445	0	0.724074	0.627385	0.59822	0.608844	0.220789	0.263444	0	0.221121	0.609383	0	0.410474	0.849514	0.532378	0.732515	0	0.219784	0.518636	0.517984	0.565507
hsa-mir-22	15.6248	16.7627	17.1182	16.3527	16.1672	16.0319	15.6185	16.2115	16.2115	16.4097	16.5167	16.0843	16.3277	16.3042	16.2213	16.2204	16.0724	16.2597	15.2365	16.1428	15.2187	16.0141	15.3303	16.0386	16.2308	16.6869	16.0893	16.0672	15.6312	15.7159	15.9394	15.844	14.6034	16.1718	16.3145	15.772	15.6497	15.4866	15.8547	15.9415	15.8623	16.1152	16.051	16.0041	14.9515	16.1804	16.1447	15.7029	16.3894
hsa-mir-221	8.93575	7.961	8.87932	7.86487	7.88499	7.47843	8.81281	8.51201	6.77059	7.00713	6.71864	5.90378	7.4593	7.45281	8.36774	6.55086	7.30316	7.88865	7.90115	5.7068	7.4223	8.23951	3.2132	7.96439	7.27574	8.89031	8.70058	7.62007	7.27188	7.98329	7.37996	7.19428	9.25124	8.49025	8.33011	8.17237	10.0237	7.59227	7.80418	6.97579	6.86037	8.00001	7.95179	8.20644	8.00714	7.2954	7.80134	8.27842	8.62485
hsa-mir-222	7.57095	6.39146	8.32682	7.11624	6.31345	6.04095	6.86635	7.4655	5.78374	6.43487	4.84643	4.50781	6.29715	6.42133	8.14893	4.99635	6.56224	6.82936	7.16711	4.2661	7.03682	7.56313	2.87326	7.2529	6.22427	7.8826	8.4719	7.19745	5.86681	6.87641	6.50188	6.6381	8.14518	8.09813	6.83014	6.33155	8.6893	6.07513	6.83296	5.26385	5.64023	6.8472	6.81478	7.31983	5.71299	5.65914	5.78333	7.18262	8.07418
hsa-mir-223	9.66427	7.33518	10.7303	10.7837	8.09572	7.58456	8.25	7.54479	7.47297	7.66293	8.45578	7.85339	8.37442	10.2254	9.91987	5.54073	9.89866	9.32381	8.84614	7.6163	8.42147	9.10162	5.00671	8.42846	6.78062	10.102	7.53645	6.30761	7.48277	7.60436	6.33136	9.57371	6.57815	9.36328	10.1716	8.67558	10.2938	8.15517	7.95236	6.23178	8.36685	7.51804	7.6855	7.88976	7.03273	6.14848	8.3107	8.0923	10.9461
hsa-mir-224	3.16934	2.57833	5.48986	4.11326	4.39578	3.85143	2.98349	6.2344	4.19086	3.48681	6.23458	2.70267	3.88127	4.12058	3.24965	4.08846	3.49792	4.66268	3.28032	3.86628	5.3368	5.14676	0.980694	6.01503	5.69178	3.8488	4.4709	6.78568	2.90151	2.36334	3.24396	3.43372	8.44657	3.82027	3.18637	4.26536	3.40879	3.16199	3.92518	5.79845	3.58803	3.89719	4.31963	2.65358	1.92712	2.28308	3.68082	7.37884	4.68455
hsa-mir-2276	0	0	0.730372	0	0.503572	0	0.111221	0.262681	0	0.712084	0	0	0	0	0	0	0	0.856743	0	0	0	0.691319	0	0.578763	0	0	0	0	0	0	0	0	0	0	0.220789	0	0	0	0.232909	0	0	0.341756	0	0	0	0.114074	0.194339	0.517984	0.310287
hsa-mir-2277	1.50858	0.929102	2.24328	2.16012	1.03161	0.620465	0.413983	1.58355	0.655751	0.712084	0.807771	0.367374	0.675559	0.751135	1.85554	0	0.497633	1.39061	1.66854	0.473115	0	0.691319	0.572121	0.578763	0.462865	1.26985	0	0	0.532417	0.871148	1.39484	1.66859	1.34571	1.36464	0.220789	0.678994	1.0921	0.221121	2.05438	0.577625	0.990857	0.849514	1.96385	1.57754	0	0.219784	0.657	0.898329	1.28672
hsa-mir-2278	0.386867	0	0	0.760351	0.273647	0	0.126884	0	0	0	0	0	0	0.751135	0	0	0	0	0	0	0	0	0	0.578763	0	0.770352	0	0	0.290631	0.500352	0.724074	0	0	0.336305	0.220789	0	0	0	0.232909	0	0	0.341756	0	0	0	0	0	0	0.310287
hsa-mir-2355	4.60727	5.18925	4.70291	6.1444	4.8364	5.03144	4.80332	6.21514	5.60766	5.34222	5.48879	5.53109	6.25265	6.057	5.5694	5.71006	6.08166	5.56144	5.09713	5.69604	5.18557	5.81579	3.91786	6.83946	5.67051	6.60998	6.89162	6.06449	5.26654	5.25966	6.90249	5.67576	4.65254	4.40694	6.81327	5.66917	5.94376	5.71462	5.39223	5.16038	5.5869	5.05931	5.47623	5.06243	3.35187	5.61137	5.96748	5.10754	6.08634
hsa-mir-2392	0	0	0	0	0	0	0	0	0	0	0	0	0	0	0	0	0	0	0	0	0	0	0	0	0	0	0	0	0	0	0	0	0	0	0	0	0	0	0	0	0	0	0	0	0	0	0	0	0
hsa-mir-23a	11.2876	11.0563	12.659	12.3786	10.287	10.9374	11.1598	11.2314	11.7457	12.4251	11.0504	10.8972	11.8886	12.1442	12.3297	12.0277	11.4198	12.2951	11.6808	11.2594	10.8604	12.0859	8.83926	12.1277	12.4295	12.1915	11.6887	11.5395	12.4939	12.0035	12.0405	11.896	12.5965	12.4783	11.2835	11.2995	11.5531	11.0016	11.7029	11.8172	11.1404	11.2438	12.2642	11.1844	10.8262	11.2691	10.9083	11.6739	12.4873
hsa-mir-23b	10.0291	10.6374	10.5971	9.70276	8.87361	9.7016	9.523	9.90897	10.6045	10.8066	10.4871	10.3954	10.7565	10.8804	9.90419	11.1338	10.3832	10.6167	9.73079	10.3378	9.04403	10.0552	9.48866	10.4662	10.9227	10.4552	10.5848	10.0408	10.1693	11.3922	11.8366	11.7037	10.9801	11.3424	10.3349	11.0268	10.2925	10.6204	10.7219	10.4242	10.4895	10.5011	10.3975	10.0732	10.3622	10.7749	10.5508	10.3904	10.0157
hsa-mir-23c	0.691626	0	0.730372	0	0.273647	0.237715	0.97211	0.262681	0.655751	0.712084	1.52419	0.903046	0	2.53152	1.56762	1.25116	0.86694	0.856743	0.627355	1.11391	0	0.691319	1.55916	1.31075	1.70914	0.770352	2.13359	1.39939	1.58908	2.67565	1.97573	2.09375	1.61136	0.336305	0.869361	0.263444	0.811106	0.995543	0.766222	0.25937	0.219786	0	0.739388	0.412258	0.678643	0.219784	1.00676	0.517984	0.782292
hsa-mir-24-1	10.1271	10.6429	10.6461	9.76851	9.53575	9.53081	10.0131	9.81423	9.1609	10.032	8.71993	8.66272	9.34468	10.1912	9.49947	9.14633	9.46302	10.1502	9.85139	9.30036	8.2026	9.54439	8.55928	9.87994	10.0115	9.95183	9.81464	9.54113	9.88694	9.94118	9.73191	10.3572	9.78083	10.6481	10.2822	9.67488	9.6796	9.56946	9.88309	9.50107	9.51987	9.45008	10.2078	9.9112	10.2144	9.63764	9.74674	9.80563	10.5732
hsa-mir-24-2	10.174	10.6444	10.6503	9.79072	9.51613	9.55196	10.0128	9.76805	9.1782	10.0205	8.78151	8.54892	9.32601	10.2628	9.3727	9.06612	9.47476	10.1948	9.9073	9.32064	8.30888	9.55975	8.48871	9.92239	10.0811	9.94254	9.85347	9.49275	9.90854	9.93019	9.74238	10.3554	9.79008	10.6441	10.3271	9.58177	9.65922	9.53734	9.87745	9.42375	9.49113	9.41492	10.1902	9.91762	10.2344	9.60326	9.66325	9.80144	10.5944
hsa-mir-2467	0	0	0	0	0	0	0.126884	0	0	0	0	0	0	0	0	0	0	0	0	0	0	0	0.572121	0	0	0	0	0	0	0	0	0	0	0	0	0	0	0	0	0	0	0	0.290608	0	0.263288	0	0	0	0
hsa-mir-25	13.9547	12.4699	12.878	13.3073	13.5685	13.1691	12.5243	12.9865	13.3322	13.2272	12.9146	12.9999	13.7231	12.7736	13.4228	13.4919	12.8103	13.516	12.8752	12.891	13.3536	13.5087	12.1847	13.8059	12.8695	13.9284	13.5384	13.2654	12.6869	13.1302	13.5063	11.9601	13.2464	12.749	13.7314	12.9199	14.7307	12.8456	13.3861	13.0971	12.5665	12.176	13.1688	12.2652	11.469	13.1844	13.2006	13.3483	12.9848
hsa-mir-2681	0	0	0	0	0	0	0	0	0	0	0	0.367374	0	0	0	0	0	0	0	0	0	0	0	0	0	0	0	0	0	0	0	0.627385	0	0	0.220789	0	0	0	0.232909	0	0	0	0	0	0	0.114074	0	0	0
hsa-mir-2682	0	0	0	0	0	0	0	0	0	0	0	0	0	0	0	0	0	0	0	0	0	0	0	0	0	0	0	0	0	0	0	0	0	0	0	0	0	0	0	0	0	0	0	0.412258	0	0	0	0	0
hsa-mir-26a-1	10.4814	10.2736	9.50639	9.41303	9.58366	10.0272	10.1331	9.6159	9.60972	9.30121	8.91199	9.07169	9.15216	9.36976	9.55452	9.01546	9.20258	8.89792	10.1734	9.17229	8.81842	9.61169	9.39268	9.09118	9.18402	9.3495	9.36072	10.5016	9.73541	9.36393	10.1803	8.9705	9.27177	9.57522	11.1218	10.6649	11.0619	10.7895	10.1038	9.16031	9.58808	10.4581	10.4327	11.638	10.9442	10.1494	10.547	9.9123	10.3487
hsa-mir-26a-2	10.4752	10.289	9.51421	9.4385	9.60548	10.0895	10.1567	9.66783	9.54895	9.26874	8.89047	9.09177	9.19982	9.45788	9.55075	9.0429	9.2404	8.87318	10.2076	9.15275	8.7767	9.69108	9.36951	9.13617	9.12757	9.23082	9.30772	10.506	9.62679	9.36302	10.1558	8.96579	9.27177	9.62163	11.1115	10.6548	11.0667	10.8086	10.0985	9.2327	9.5924	10.436	10.4436	11.6694	10.9407	10.1384	10.5615	9.96532	10.3734
hsa-mir-26b	10.0007	9.60668	9.72438	9.93013	9.63345	10.0795	9.23367	9.25716	9.25358	9.3514	8.3302	8.38087	9.61791	9.57104	9.32047	8.21269	9.32252	9.29057	9.86494	8.54527	8.87637	9.89393	9.30992	9.0555	8.84501	9.35573	9.97015	10.3774	8.34253	9.315	9.18031	9.34509	9.00512	10.4941	10.6681	10.6644	10.4764	10.7282	10.26	8.95376	9.56852	10.9076	10.8888	12.2303	8.47806	9.1791	10.4033	9.8091	10.8907
hsa-mir-27a	11.1429	10.3787	11.3684	11.4377	10.0091	10.8155	10.999	10.4423	9.83093	10.8851	9.46679	9.48878	10.293	10.773	11.0805	9.74513	10.2303	10.636	10.395	9.82284	9.45948	10.7584	7.9528	10.6573	10.9725	10.8249	10.3845	10.0413	11.3582	10.652	9.72859	10.6739	10.8101	11.1688	10.746	10.4627	10.6956	10.5576	10.6044	10.4474	10.3881	10.1551	11.5684	11.4306	9.81691	10.2341	10.138	10.7191	12.1048
hsa-mir-27b	11.2363	11.4769	10.6666	10.2276	10.1353	10.7731	10.0812	10.5224	10.0464	10.521	10.1413	10.1458	10.4323	10.819	9.50468	10.2735	10.2318	10.2687	9.24104	9.99951	8.76874	9.94251	10.7043	9.83932	10.0675	9.58511	10.9001	9.88892	9.7793	11.1357	10.6204	11.0742	10.4046	11.7811	11.1485	11.5106	10.6654	11.4415	11.2923	10.4363	10.8702	10.822	11.04	11.3949	10.7837	10.8492	11.0842	10.6367	10.6258
hsa-mir-28	12.7746	11.6836	13.2997	13.2341	12.3606	12.8482	12.1891	13.2708	12.8997	12.3267	13.5863	13.2588	12.8445	12.5118	11.7982	13.3221	13.3207	12.5555	11.8035	13.0032	12.2181	12.2524	9.69588	12.2676	12.6401	11.8501	12.9469	13.0839	12.1898	13.239	12.5302	12.6982	12.1196	12.7155	12.8605	13.3848	12.4261	13.4967	12.3983	12.9562	13.2256	12.6011	12.3379	12.4666	11.1687	13.2565	13.5297	13.0272	12.4457
hsa-mir-2861	0	0	0	0	0	0	0	0	0	0	0	0	0	0	0	0	0	0	0	0	0	0	0	0	0	0	0	0	0	0	0	0	0	0	0	0	0	0	0	0	0	0	0	0	0	0	0	0	0
hsa-mir-2909	0	0	0	0	0	0	0	0	0	0	0	0	0	0	0	0	0	0	0	0	0	0	0	0	0	0.770352	0	0	0	0	0	0	0	0	0	0	0	0	0	0	0	0	0	0	0	0	0	0	0
hsa-mir-296	4.41267	2.05808	3.3543	5.18543	0.876125	1.28273	1.63239	0.998941	2.75582	2.06724	0.807771	0	2.5305	2.1426	1.20754	2.10861	0.86694	0.856743	1.39736	1.55607	0	0	0.980694	2.68465	2.25784	1.64018	1.42977	0.863107	0.739437	0.871148	6.07655	1.06317	1.34571	1.20951	3.47088	2.3805	2.60721	2.26594	4.47245	1.05884	1.65044	2.47094	2.38956	1.86637	1.00076	0.729651	2.52572	2.4113	1.65973
hsa-mir-297	0	0	0	0	0	0	0	0	0	0	0	0	0	0	0	0	0	0	0	0	0	0	0	0	0	0	0	0	0	0	0	0	0	0	0	0	0	0	0	0	0	0	0	0	0	0	0	0	0
hsa-mir-298	0	0	0	0	0	0	0	0	0	0	0	0	0	0	0	0	0	0	0	0	0	0	0	0	0	0	0	0	0	0	0	0	0	0	0	0	0	0	0	0	0	0	0	0	0	0	0	0	0
hsa-mir-299	2.83815	2.63192	4.09062	3.05067	1.80996	2.1386	1.27582	3.10246	2.62736	2.7535	3.6591	1.73119	1.48111	3.49143	1.85554	2.28241	2.4675	3.88617	1.89672	2.5001	2.07639	2.70771	2.4277	2.15542	3.43765	3.53422	3.48082	1.60757	2.76607	1.61955	2.47583	2.68877	1.83562	3.23275	3.18637	3.5383	1.32718	2.05211	2.51865	2.70371	2.10139	2.47094	3.1022	2.92891	2.00114	2.15567	3.08719	1.92892	4.26577
hsa-mir-29a	12.2418	13.1574	12.7828	12.0466	12.7364	12.9396	12.6324	10.6214	12.1816	12.7051	12.2791	12.1286	12.2362	12.3341	12.9704	11.5667	12.3618	12.2475	12.2493	12.4462	12.9311	13.5294	12.2139	13.1108	12.2087	13.2789	12.0844	12.1859	12.4155	12.3822	11.3835	12.3537	13.7841	12.4332	14.0866	13.8929	13.5502	14.2144	12.5927	12.38	12.9207	13.2939	13.2498	14.5442	12.8811	12.9795	14.1259	12.7027	13.8305
hsa-mir-29b-1	7.71939	8.30516	8.45879	8.37349	8.88577	9.06379	8.94675	7.45075	8.58802	9.23246	7.60459	6.98711	8.78316	8.35849	9.83658	7.87545	8.58983	8.67848	9.32798	7.31602	9.20998	10.3599	8.96542	9.45302	8.72891	10.0673	8.24502	8.28065	8.51351	8.91255	7.72259	8.58074	10.0749	8.85333	8.87191	9.20556	9.5567	9.31452	8.74431	8.24239	8.19685	9.80592	9.11136	10.5925	6.19921	7.34297	8.71786	9.00061	10.1616
hsa-mir-29b-2	7.79526	8.37656	8.49174	8.43553	8.90601	9.15183	8.9983	7.72445	8.69205	9.10785	7.83544	7.17254	8.88326	8.43452	9.78183	8.02514	8.73078	8.68986	9.44873	7.31953	9.23523	10.3906	9.0219	9.45404	8.79674	9.9692	8.36106	8.31073	8.52229	8.88499	7.87658	8.43621	10.0762	8.97724	8.94876	9.37401	9.64739	9.48194	8.86523	8.41631	8.39322	9.93916	9.2287	10.6663	6.43112	7.4796	8.84228	9.06019	10.1661
hsa-mir-29c	10.7252	10.9839	9.55523	9.66811	10.6371	10.6513	10.7974	9.12097	10.326	9.34999	10.4285	10.7517	10.4903	10.2603	10.685	10.2397	10.2529	8.99513	10.3833	10.4589	9.02633	10.9979	12.8654	11.0588	9.6854	10.921	10.1669	9.61832	10.59	10.6159	9.94391	9.79686	9.63742	10.2673	12.1953	12.9428	12.1825	13.5732	10.896	10.5976	11.41	12.5495	10.9067	14.1456	10.5837	11.3897	12.7895	11.2087	10.4297
hsa-mir-300	0	0	0	0	0	0	0	0	0	0	0	0	0	0	0	0	0	0	0	0	0	0	0	0	0	0	0	0	0	0	0	0	0	0	0	0	0	0	0	0	0	0	0	0	0	0	0	0	0
hsa-mir-301a	4.97488	3.95098	4.28199	4.49256	3.71302	4.11272	3.27841	4.03363	4.32116	4.50448	1.85868	1.73119	4.19529	4.00257	4.89761	3.65474	3.54958	5.06341	5.90282	2.28719	3.41312	4.77793	2.4277	4.26769	4.51979	4.32578	4.4709	4.45176	3.49391	3.95509	5.08398	3.97348	3.62113	5.02247	3.3118	2.68015	4.40493	2.72938	4.95232	3.06796	3.32924	3.44494	4.74879	3.72665	1.92712	2.25848	2.5614	3.97144	4.30132
hsa-mir-301b	1.50858	0.929102	1.57396	1.91671	1.89343	1.48091	0.338005	0.998941	1.10492	1.18672	1.08798	0.659931	1.13385	2.1426	2.3011	0.634248	1.40467	3.3104	2.09369	0	1.38336	3.16862	0	2.307	1.86708	3.44355	2.95906	1.95097	0.532417	1.96418	4.59337	0.627385	1.34571	2.96818	1.65527	1.00123	1.70649	0.412811	2.72388	0.838204	1.4036	0.849514	2.56302	1.40808	0	0.318275	0.89933	1.7552	1.86374
hsa-mir-302a	0	0	0	0	0	0	4.47819	0	0	0	0	0	0	0	2.91594	0	0	0	0	0	0	0	0	0	0	0	0	0	0.290631	0	0	0	0	0	0	0	0	0	1.03648	0	0	0	0	0	0	0	0	0	0
hsa-mir-302b	0	0	0	0	0	0	4.51525	0	0	0	0	0	0	0	2.3011	0	0	0	0	0	0	0	0	0	0.812745	0.770352	0	0	0	0	0	0	0	0	0	0	0	0	1.26401	0	0	0	0.290608	0	0	0	0	0	0
hsa-mir-302c	0	0	0	0	0	0	1.31053	0	0	0	0	0	0	0	0	0	0	0	0	0	0	0	0	0	0	0	0	0	0	0	0	0	0	0	0	0	0	0	0.766222	0	0	0	0	0	0	0	0	0	0
hsa-mir-302d	0	0	0	0	0.273647	0	2.72262	0	0	0	0	0	0	0	0.726588	0	0	0	0	0	0	0	0	0	0	0	0	0	0	0	0	0	0	0	0	0	0	0	0.433392	0	0	0	0	0	0	0	0	0	0
hsa-mir-302e	0	0	0	0	0	0	0	0	0	0	0	0	0	0	0	0	0	0	0	0	0	0	0	0	0	0	0	0	0	0	0	0	0	0	0	0	0	0	0	0	0	0	0	0	0	0	0	0	0
hsa-mir-302f	0	0	0	0	0	0	0	0	0	0	0	0	0	0	0	0	0	0	0	0	0	0	0	0	0	0	0	0	0	0	0	0	0	0	0	0	0	0	0	0	0	0	0	0	0	0	0	0	0
hsa-mir-3064	0.691626	0.293986	0.730372	1.45141	0.273647	0.779466	0.3514	0.262681	0.655751	0	0.459696	0	0	0	0	0	0	0.856743	0	0.473115	0	0.691319	0	0.578763	0.812745	0.770352	0.885202	0.495159	0.532417	0.500352	0	0	0	0.608844	0.220789	0.263444	1.0921	0.870418	0.907669	0.577625	0.729655	0.617859	0.532378	0.412258	0.263288	0.41047	0.365581	0.282115	0.782292
hsa-mir-3065	5.5108	3.81858	4.10911	1.45141	4.49266	5.52231	2.9522	5.78451	4.40192	3.00358	4.72885	4.22421	3.93858	4.00257	3.14676	3.41444	3.44433	2.5523	5.77948	4.53119	3.04254	4.28116	6.64801	2.89072	4.76028	1.93461	6.4772	3.54181	2.50758	2.93224	3.9696	4.32673	4.12459	3.34882	4.75292	4.25026	5.26117	3.99163	3.72946	3.6689	3.42076	3.97282	4.64966	5.48095	4.18731	2.50841	3.69695	3.56057	3.61798
hsa-mir-3074	1.79094	2.91737	3.63504	4.69936	2.7757	1.95083	1.51594	1.58355	4.14467	3.71427	1.52419	1.96349	4.49184	2.96923	4.45622	2.4375	3.69432	4.75223	1.89672	2.03732	4.16123	5.0958	1.29873	3.50652	5.11547	4.51578	4.67602	2.46054	1.96394	2.57887	3.51468	3.0147	2.73386	2.96818	3.42719	3.35271	2.31075	2.83362	3.82173	2.72536	2.30727	3.61194	3.65582	3.21244	0.263288	1.68776	2.93229	4.48425	3.23241
hsa-mir-30a	13.8161	13.1151	14.0627	15.1309	14.5915	13.5998	14.1006	15.5672	14.8328	14.2802	15.1102	15.6688	15.0946	13.8642	13.6086	15.107	14.6634	12.5944	16.0346	14.4715	11.5378	13.5397	12.4081	13.2458	12.5514	12.7826	13.8741	14.2038	14.6476	14.337	13.5442	13.7478	11.0084	12.8221	14.2957	14.7097	15.1529	15.4308	13.2717	14.1716	14.6434	14.0369	13.6129	14.1474	12.6988	14.7766	14.7823	13.6289	12.0612
hsa-mir-30b	9.86031	9.01783	7.65518	9.28729	9.12689	9.54264	8.38284	8.25998	7.98323	8.51583	7.90936	7.42225	8.72122	8.4402	8.33008	7.43222	8.29102	8.95089	9.20953	7.41448	7.58223	9.87422	7.58338	8.74458	7.95208	8.40824	9.66312	10.2561	7.57346	8.85172	8.68416	8.70082	9.31431	8.59583	10.5944	9.58779	8.58756	10.1031	8.67736	7.76457	8.69766	8.64702	8.94627	10.3246	7.21486	8.71809	9.09714	9.36526	8.77385
hsa-mir-30c-1	8.65673	8.04489	7.57932	8.47967	8.48189	8.94822	7.95198	9.25244	8.40666	8.01936	7.69619	7.48898	8.48195	7.53482	7.96837	7.62007	8.35048	7.92761	8.16482	7.37455	7.90629	8.45196	6.36247	7.83938	7.83745	7.77516	8.60339	9.25628	7.33106	8.01369	9.45745	7.92083	8.67049	7.9559	8.50775	8.4586	8.08084	8.63435	7.95236	6.96218	7.96377	8.05325	9.39286	8.6707	6.76969	7.62499	8.21732	7.99306	8.08825
hsa-mir-30c-2	8.7688	8.16336	7.69549	8.52521	8.60075	8.99049	8.03113	9.38202	8.48984	8.10879	8.03232	7.63083	8.48676	7.42441	8.00192	7.69886	8.18883	7.89849	8.31303	7.49739	7.91112	8.53799	6.50844	7.91803	7.84933	7.79822	8.69174	9.24561	7.44816	8.15887	9.50805	8.16764	8.59582	7.98609	8.55037	8.63254	8.11658	8.70534	7.95746	7.1904	8.03972	8.11992	9.36383	8.67187	6.997	7.8526	8.22082	8.08658	8.03513
hsa-mir-30d	12.7652	12.1109	12.0817	12.3512	13.0969	12.7478	11.7361	12.064	12.3665	12.5826	12.7714	12.4755	13.2964	12.1553	11.6367	12.6904	12.4405	13.0492	13.9115	12.5767	12.0762	13.1887	10.1166	12.6431	11.9771	11.9174	13.1571	13.098	12.5592	12.8828	12.2575	12.4709	13.3196	13.0417	12.4643	12.4735	11.6658	12.282	11.4845	11.6653	12.1624	12.034	11.0022	12.0981	11.5429	11.4926	12.0693	12.2143	11.4331
hsa-mir-30e	13.3128	12.8526	13.5763	13.9294	13.0899	13.252	12.0621	13.81	13.8434	13.3259	13.3037	13.5829	14.0748	13.5205	14.078	13.1395	13.38	13.2787	13.2156	13.2464	14.1788	13.984	12.2936	13.6676	13.2872	13.8503	14.2472	14.4479	13.5303	13.6122	14.188	13.4628	13.8813	13.8265	14.2518	13.6369	13.9323	14.0027	13.8642	12.7186	13.2881	13.814	14.7461	13.9909	12.8289	12.8937	13.4463	13.367	13.4891
hsa-mir-31	2.13194	6.02659	6.00608	6.28583	2.86112	2.71212	6.75329	5.26846	2.48633	6.19206	0.807771	2.88363	4.63741	3.73293	7.60583	3.45132	4.25727	5.95002	7.16163	3.7039	4.50577	4.95992	1.55916	2.56941	4.98369	3.44355	5.6717	7.30222	5.01098	7.7476	4.11237	6.54858	7.01065	5.85715	4.21174	5.86536	5.16584	4.38382	8.53402	1.41907	2.04497	6.44852	5.49062	7.91568	3.17128	2.62845	5.14828	5.22049	5.97517
hsa-mir-3115	0.386867	0	0	0	0	0	0	0	0.655751	0	0	0	0	0	0	0	0	0	0	0	0	0.691319	0	0.578763	0	0	0	0	0.290631	0	0.406994	0	0	0.336305	0	0	0	0	0	0	0	0	0.290608	0	0	0	0	0	0
hsa-mir-3116-1	0.386867	0	0	0.760351	0	0	0	0	0	0	0	0	0	0	0	0	0	0	0	0	0	0	0	0	0	0	0	0	0.290631	0	0.406994	0	0	0.608844	0	0	0	0	0	0	0	0	0	0.412258	0	0	0	0	0
hsa-mir-3116-2	0	0	0.286513	0.760351	0.273647	0.441747	0	0.262681	0	0	0	0	0	0	0	0	0	0	0	0	0	0	0	0	0	0	0	0	0.290631	0	0	0	0.59822	0	0	0	0	0	0.232909	0	0	0	0	0.412258	0	0	0	0	0.310287
hsa-mir-3117	1.34355	0	0.286513	0	1.29984	0.620465	0.600484	0.677277	0	1.18672	0	0	1.13385	0	0	0.351701	0	1.39061	0	0	0	1.15673	0	0	1.86708	0.770352	1.42977	0	0.532417	0.500352	0	0.627385	0.59822	0.608844	0	0	0.249311	0.412811	0.232909	0.577625	0.410474	0	0.532378	0	0	0.497126	0	0	0.310287
hsa-mir-3118-1	0	0	0	0	0	0	0	0	0	0	0	0	0	0	0	0	0	0	0	0	0	0	0	0	0	0	0	0	0	0	0	0	0	0	0	0	0	0	0	0	0	0	0	0	0	0	0	0	0
hsa-mir-3118-2	0	0	0	0	0	0	0	0	0	0	0	0	0	0	0	0	0	0	0	0	0	0	0	0	0	0	0	0	0	0	0	0	0	0	0	0	0	0	0	0	0	0	0	0	0	0	0	0	0
hsa-mir-3118-3	0	0	0	0	0	0	0	0	0	0	0	0	0	0	0	0	0	0	0	0	0	0	0	0	0	0	0	0	0	0	0	0	0	0	0	0	0	0	0	0	0	0	0	0	0	0	0	0	0
hsa-mir-3118-4	0	0	0	0	0	0	0	0	0	0	0	0	0	0	0	0	0	0	0	0	0	0	0	0	0	0	0	0	0	0	0	0	0	0	0	0	0	0	0	0	0	0	0	0	0	0	0	0	0
hsa-mir-3119-1	0	0	0	0	0	0	0	0	0	0	0	0	0	0	0	0	0	0	0	0	0	0	0	0	0	0	0	0	0	0	0	0	0	0	0	0	0	0	0	0	0	0	0	0	0	0	0	0	0
hsa-mir-3119-2	0	0	0	0	0	0	0	0	0	0	0	0	0	0	0	0	0	0	0	0	0	0	0	0	0	0	0	0	0	0	0	0	0	0	0	0	0	0	0	0	0	0	0	0	0	0	0	0	0
hsa-mir-3120	0	0	0	0	0	0	0	0	0	0	0	0	0	0	0	0	0	0	0	0	0	0	0	0	0	0	0	0	0	0	0	0	0	0	0	0	0	0.221121	0	0	0	0	0	0	0	0	0	0	0
hsa-mir-3121	0	0	0	0	0	0	0	0	0	0	0	0	0	0	0	0	0	0	0	0	0	0	0	0	0	0	0	0	0	0	0	0	0	0	0	0	0	0	0	0	0	0	0	0	0	0	0	0	0
hsa-mir-3122	0	0	0	0	0	0	0	0	0	0	0	0	0	0	0	0	0	0	0	0	0	0	0	0	0	0	0	0	0	0	0	0	0	0	0.220789	0	0	0	0	0	0	0	0	0	0	0	0	0	0
hsa-mir-3123	0	0	0	0	0	0	0	0	0	0	0	0	0	0	0	0	0	0	0	0	0	0	0	0	0	0	0	0	0	0	0	0	0	0	0	0	0	0	0	0	0	0	0	0	0	0	0	0	0
hsa-mir-3124	0	0.538086	0	1.02917	0	0	0	0	0	0	0	0.367374	0	0	0	0	0	0	0	0	0	0	0	0	0	0	0	0	0	0	0	0	0	0.608844	0.41223	0	0.647008	0	0.232909	0.135506	0	0.341756	0	0	0	0	0.365581	0	0
hsa-mir-3125	0	0	0	0	0	0	0	0	0	0.712084	0	0	0	0	0	0	0	0	0	0	0	0	0	0	0	0	0	0	0	0	0	0	0	0	0	0	0	0	0	0	0	0	0.290608	0	0	0	0	0	0
hsa-mir-3126	0	0.293986	0	0.429697	0.503572	0	0.229065	0.677277	0	0.712084	0	0	0	0.751135	0	0	0	0	0	0	0	0	0	0.578763	0	0	0	0	0	0	0	0.627385	0	0	0	0	0.249311	0	0	0.135506	0	0	0	0	0.678643	0	0.194339	0.282115	0.565507
hsa-mir-3127	4.16312	2.34153	3.32297	1.77764	1.97234	3.06075	1.4137	2.99815	1.72323	4.33236	2.13003	1.73119	1.13385	2.69263	1.56762	2.19813	1.61328	3.9632	2.6887	3.1938	2.89433	3.73283	0.980694	3.50652	3.43765	3.77635	3.10822	1.95097	3.06433	1.80213	4.05694	1.89678	3.12229	3.70883	3.21234	1.92781	2.13603	1.65686	2.5621	1.87141	1.57276	2.32466	2.50748	1.99164	1.00076	0.929849	1.78718	2.86063	3.70018
hsa-mir-3128	0	0	0	0.760351	0	0	0	0	0	0	0	0	0	0	0	0	0	0	0	0	0	1.15673	0	0	0	0	0	0	0	0	0	0	0	0	0	0	0.249311	0	0.232909	0	0	0.341756	0	0	0	0	0.194339	0	0
hsa-mir-3129	0	0.293986	1.06932	0.429697	0	0.441747	0.600484	0.677277	0.655751	0.712084	0.459696	0	0.675559	0	0.726588	0	0	0	0	0	0	0.691319	0.572121	0.578763	1.09412	1.93461	0.885202	0.495159	0	0.500352	0.406994	0	0.59822	0.837988	0.869361	0.263444	0.647008	0.581993	0	0.577625	0.410474	0.341756	0.739388	0.412258	0	0.114074	0	0.517984	0.310287
hsa-mir-3130-1	1.50858	0.293986	3.15523	2.16012	1.41731	0.922669	0.947649	1.37721	2.48633	2.4508	2.24869	2.16351	1.7608	2.69263	3.03596	1.25116	1.16072	2.5523	2.26697	1.35186	3.87523	1.15673	1.55916	3.07099	3.94247	2.17901	4.02205	1.78946	2.85776	2.10985	2.19696	1.66859	2.20067	2.05319	1.40801	1.13884	3.60047	1.73072	1.92723	0.756464	1.86115	2.24555	2.12013	2.21364	1.37945	0.799516	2.06088	1.65982	3.1951
hsa-mir-3130-2	1.65666	0.929102	3.41499	2.85701	1.17195	1.05293	1.19198	0.998941	1.44695	1.54325	2.00073	1.85201	1.99497	2.35013	2.91594	0.870418	0.86694	3.18736	2.91395	1.89403	2.07639	1.50806	0.572121	2.68465	3.86967	2.57041	3.2434	0	2.90151	1.61955	2.19696	1.39741	1.83562	1.74961	1.65527	1.48701	3.57786	1.73072	1.54953	1.25017	1.86115	2.47094	1.78857	2.40598	1.8491	1.21193	2.01014	1.44774	3.03538
hsa-mir-3131	4.62536	1.09093	0.525446	0	1.17195	1.95083	0.111221	1.2618	2.33	1.82891	0.459696	0	1.7608	0	0.726588	1.25116	0.497633	3.05285	0	0	1.38336	1.79037	0.572121	0.578763	2.13897	0	0	3.32315	1.08125	0	4.63181	0	1.61136	3.79321	2.36016	1.38002	2.515	0.995543	3.12249	2.7677	1.65044	0.849514	0.532378	2.10691	0.263288	0.318275	0.89933	2.46872	2.04243
hsa-mir-3132	0	0	0	0	0	0	0	0	0	0	0	0	0	0.751135	0	0	0	0	0	0	0	0	0	0	0	0	0	0	0	0	0	0	0	0	0	0.263444	0	0	0	0.135506	0	0	0.290608	0	0	0.114074	0	0	0
hsa-mir-3133	0	0	0	0	0	0	0	0.262681	0.655751	0	0	0	0	0	0	0	0	0	0	0.473115	0	0	0	0.578763	0.462865	0	0	0	0	0	0	0	0	0	0.220789	0	0	0	0	0	0.219786	0	0	0.412258	0	0	0	0	0
hsa-mir-3134	0	0	0	0	0	0	0	0	0	0	0	0	0	0	0	0	0	0	0	0	0	0	0	0	0	0	0	0	0	0	0	0	0	0	0	0	0	0	0	0	0	0	0	0	0	0	0	0	0
hsa-mir-3135a	0	0	0	0	0	0	0	0	0	0	0	0	0	0	0	0	0	0	0	0	0	0	0	0	0	0	0	0	0	0	0	0	0	0	0	0	0	0	0	0	0	0	0	0	0	0	0	0	0
hsa-mir-3135b	0	0	0	0	0	0	0	0	0	0	0	0	0	0	0	0	0	0	0	0	0	0	0	0	0	0	0	0	0	0	0	0	0	0	0	0	0	0	0	0	0	0	0	0	0	0	0	0	0
hsa-mir-3136	0.943099	0.293986	0.525446	0.429697	0.503572	0.922669	0.243505	0.677277	1.72323	1.54325	0.459696	0	1.7608	1.24259	0	0	0	0	1.06313	0	0	1.15673	0	0.578763	1.86708	1.64018	0.885202	0.495159	0.920445	1.41047	1.20394	0	0	0.837988	0.581218	0	0.811106	0.412811	0.433392	0	0.410474	0.341756	1.08119	1.57754	0	0.219784	1.10675	0.282115	1.86374
hsa-mir-3137	0	0.293986	1.06932	0	0.273647	0	0	0.484822	0	0	0	0	0	0.751135	0	0	0	0	0.627355	0	0	0	0	0	0	0	0	0.495159	0.532417	0	0	0	0	0	0	0	0.249311	0	0	0.135506	0	0	0	0.732515	0	0	0	0	0.310287
hsa-mir-3138	0.386867	0	0.909778	0.429697	0	0	0	0.262681	0	0	0.459696	0	0	0	0.726588	0	0	0	0.627355	0	0	0.691319	0	0	1.32947	0.770352	0.885202	0.863107	0	1.41047	0.406994	0	0	0.336305	0.220789	0.263444	0	0	0.232909	0.25937	0	0	0.532378	0.412258	0	0	0.194339	0	0
hsa-mir-3139	0	0	0	0	0	0	0	0.484822	0	0	0	0	0	0	0	0	0	0	0	0	0	0	0	0	0	0	0	0	0	0	0.406994	0	0	0	0	0	0	0	0.609383	0	0	0.341756	0	0	0	0	0	0	0.310287
hsa-mir-3140	0.386867	0	0.730372	0.429697	0	0.237715	0.243505	0.262681	1.10492	0	0	0	0.675559	0	0.726588	0.634248	0.86694	0	0	0	0	0.691319	0	0	0.462865	0	0	0	0	0	1.20394	0	0	0.336305	0	0	0	0	0.232909	0	0.219786	0.341756	0.290608	0	0	0.114074	0	0	0.782292
hsa-mir-3141	0	0	0	0	0	0	0	0	0	0	0	0	0	0	0	0	0	0	0	0	0	0	0	0	0	0	0	0	0	0	0	0	0	0	0	0	0	0	0	0	0	0	0	0	0	0	0	0	0
hsa-mir-3142	0	0	0	0	0	0	0	0	0	0	0	0	0	0	0	0	0	0	0	0	0	0	0	0	0	0	0	0	0	0	0	0	0	0	0	0	0	0	0	0	0	0	0	0	0	0	0	0	0
hsa-mir-3143	0	0	0.525446	0	0	0	0	0	0	0	0	0	0.675559	0	1.20754	0	0	0	0	0	0	0	0	0	0	1.26985	0	0	0	0	0	0	0	0	0	0	0	0	0.433392	0.135506	0	0	0	0	0	0	0	0.282115	0.565507
hsa-mir-3144	0	0	0	0	0	0	0	0	0	0	0	0	0	0	0	0	0	0	0	0	0	0	0	0	2.56501	0	0	0	0	0	0	0	0	0	0	0.263444	1.21442	0	0	0.135506	0	0	0	0	0	0.114074	0	0	0
hsa-mir-3145	0.386867	0	0.525446	0.429697	0.273647	0.237715	0.126884	0.262681	0.655751	0	0	0	0	0	0.726588	0.351701	0	0	0	0	0.851499	0	0	0	0	0	0	0	0.290631	0	0.724074	0	0.59822	0.608844	0.220789	0.263444	0	0	0.232909	0	0.219786	0	0	0	0	0	0	0.282115	0
hsa-mir-3146	0	0	0.286513	0	0.273647	0	0	0	0	0	0	0	0	0	0	0	0	0	0	0	0	0	0	0	0	0	0	0	0	0	0.406994	0	0	0	0	0	0	0	0	0	0.219786	0	0	0	0	0	0	0	0
hsa-mir-3147	0	0	0	0	0	0	0	0	0	0	0	0	0	0	0	0	0	0	0	0	0	0	0	0	0	0	0	0	0	0	0	0	0	0	0	0	0	0	0	0	0	0	0	0	0	0	0	0	0
hsa-mir-3148	0	0	0	0	0	0	0	0	0	0	0	0	0	0	0	0	0	0	0	0	0	0	0	0	0	0	0	0	0	0	0	0	0	0	0	0	0	0	0	0	0	0	0	0	0	0	0	0	0
hsa-mir-3149	0	0	0.286513	0	0.273647	0	0	0	0	0	0	0	0	0	0.726588	0	0	0	0	0	0	0	0	0	0	0	0	0	0.290631	0	0.406994	0	0	0	0	0	0.249311	0.221121	0	0	0.219786	0	0	0.412258	0	0	0	0	0
hsa-mir-3150a	0.943099	0.293986	0.525446	0.760351	0	0.441747	0	0.677277	0	0.712084	0	0	0	0.751135	0	0.351701	0	0	0	0	0	0.691319	0	0.578763	1.53176	0	0	0	0	0	0	0	0.59822	0	0	0.263444	0.249311	0	0.232909	0.25937	0	0.341756	0.739388	0	0	0	0.365581	0	0.565507
hsa-mir-3150b	2.63886	0	1.86246	0.760351	0.503572	0.779466	0.533935	1.92444	0	0.712084	3.08832	0.903046	1.48111	0.751135	1.20754	1.07331	1.7955	0.856743	0	0.828799	0.851499	0.691319	0	1.79404	0.462865	2.73237	0.885202	4.33952	0.920445	0.500352	3.93927	1.06317	2.8412	2.05319	3.38213	1.26447	2.73534	0.733401	0.232909	0.988978	1.4036	1.04907	0.290608	0.732515	0.848674	0.219784	1.10675	3.02276	3.03538
hsa-mir-3151	0	0	0	0	0	0	0	0	0	0	0	0	0	0	0	0	0	0	0	0	0	0	0	0	0	0	0	0	0	0	0	0	0	0	0	0	0	0	0	0	0	0	0	0	0	0	0	0	0
hsa-mir-3152	0	0	0	0	0	0.237715	0	0	0	0	0	0	0	1.24259	0	0	0	0	0	0	0	0	0	0	0	0	0	0	0	0.871148	0	0	0	0	0.220789	0.486129	0	0.221121	0	0	0	0	0	0.732515	0	0.114074	0	0.282115	0.310287
hsa-mir-3153	0	0	0.525446	0	0	0	0	0	0	0	0	0	0	0	0	0	0	0	0.627355	0	0	0	0	0	0	0	0	0	0	0	0	0	0	0	0	0	0	0	0.232909	0	0	0	0	0	0	0	0	0	0
hsa-mir-3154	0	0.293986	0.286513	0.429697	0	0	0.111221	0	0	0	0	0.367374	0	0	0	0	0	0	0.627355	0.473115	0	0	0	0	0	0	0	0	0	0	0	0	0	0	0	0	0	0	0	0.135506	0	0	0	0	0.678643	0	0	0.282115	0.565507
hsa-mir-3155a	0.691626	0	0.286513	0	0.273647	0	0	0	0	0	0	0	0	0	0	0	0	0	0	0	0	0	0.572121	0	0.462865	0.770352	0	0	0	0	0	0	0	0	0	0	0	0	0.232909	0.25937	0	0	0.290608	0	0	0	0	0.282115	0
hsa-mir-3155b	0	0	0	0	0	0	0	0	0	0	0	0	0	0	0	0	0	0	0	0	0	0	0	0	0	0	0	0	0	0	0	0	0	0	0	0	0	0	0	0	0	0	0	0	0	0	0	0.282115	0
hsa-mir-3156-1	0	0	0	0	0	0	0	0	0	0	0	0	0	0	0	0	0	0	0	0	0	0	0	0	0	0	0	0	0	0	0	0	0	0	0	0	0	0	0	0	0	0	0	0	0	0	0	0	0
hsa-mir-3156-2	0	0	0	0	0	0	0	0	0	0	0	0	0	0	0	0	0	0	0	0	0	0	0	0	0	0	0	0	0	0	0	0	0	0	0	0	0	0	0	0	0	0	0	0	0	0	0	0	0
hsa-mir-3156-3	0	0	0	0	0	0	0	0	0	0	0	0	0	0	0	0	0	0	0	0	0	0	0	0	0	0	0	0	0	0	0	0	0	0	0	0	0	0	0	0	0	0	0	0	0	0	0	0	0
hsa-mir-3157	0	0	0.525446	0.760351	0.273647	0.441747	0.243505	0.262681	0	0	0	0.659931	0.675559	0	0.726588	0	0	0	0	0	0	1.15673	0.572121	0.990691	0.462865	0	0	0.495159	0	0.500352	0.406994	0	0	0	0.732472	0.84909	1.6206	0.412811	0.907669	0.373436	0.219786	0.849514	1.08119	1.99164	0.263288	0.497126	1.00676	0.720654	0.970717
hsa-mir-3158-1	0.386867	0	0.286513	1.02917	0.273647	0.441747	0	0	0	0	0	0	0	0.751135	0.726588	0	0.497633	0	0	0	0	0	0	0.578763	0.462865	0	1.42977	0.495159	0.290631	0	0	0	0.59822	0.608844	0.41223	0	0	0.221121	0.609383	0.135506	0	0	0	0	0	0	0.194339	0	0.782292
hsa-mir-3158-2	0	0.293986	0	0	0	0.237715	0	0.262681	0	0	0	0	0	0	0.726588	0.351701	0.497633	0	0	0	0	0	0	0	0.462865	0.770352	0	0	0	0	0.406994	0	0	0.608844	0.41223	0	0.249311	0	0	0	0.219786	0	0.290608	0.412258	0	0.219784	0.194339	0	0.310287
hsa-mir-3159	0	0	0	0	0	0	0	0	0	0	0	0	0	0.751135	0	0	0	0	0	0	0	0	0	0	0	0	0	0	0	0	0.406994	0	0	0	0	0	0	0	0	0	0	0	0	0	0.263288	0	0	0	0
hsa-mir-3160-1	0.386867	0	0	0	0	0	0	0	0	0	0	0	0	0.751135	0	0	0	0	0	0	0	0	0	0	0.462865	0	0	0	0	0	0	0	0	0	0.220789	0	0	0	0	0.135506	0	0.341756	0	0	0	0	0	0	0
hsa-mir-3160-2	0	0	0.286513	0	0	0	0	0	0	0	0	0	0	0	0	0	0	0	0	0	0	0	0	0	0	0	0	0	0	0	0	0	0	0.608844	0	0.263444	0	0	0	0	0	0	0	0	0	0	0	0	0
hsa-mir-3161	0.691626	0.293986	0	0	0	0	0.338005	0	0.655751	2.06724	0	0	0	0	0	0	0	0	0	0	0	0	0	0	0	0	0	0.495159	0	0	0.406994	0	0	0	0.41223	0	0	0	0	0	0	0	0	0	0	0	0	0	0
hsa-mir-3162	0	0	0	0	0	0	0	0.262681	0	0	0	0	0	0	0	0	0	0	0	0	0	0	0	0	0	0	0	0	0	0	0	0	0	0	0	0	0	0	0	0	0	0	0	0	0	0	0	0	0
hsa-mir-3163	0	0	0	0	0	0	0	0	0	0	0	0	0	0	0	0.351701	0	0	0	0	0	0	0	0	0	0	0	0	0	0	0	0	0	0	0.220789	0	0.249311	0	0	0	0	0	0	0	0	0.114074	0	0	0
hsa-mir-3164	0	0.293986	0	0	0	0.441747	0	0	0.655751	0	0	0	0	0	0	0	0	0	0	0	0	0	0	0	0	0	0	0	0	0	0	0	0	0	0	0	0	0	0	0	0	0	0	0	0	0	0	0	0.310287
hsa-mir-3165	0	0	0.286513	0	0	0	0	0	0	0	0	0	0	0	0	0	0	0	0	0	0	0	0	0	0	0	0	0	0	0	0	0	0	0	0	0.263444	0	0	0	0	0	0	0	0	0	0	0	0.282115	0.310287
hsa-mir-3166	0	0.293986	0.286513	0	0	0	0	0.262681	0	0	0	0	0	0	0	0	0	0	0	0	0	0	0	0	0	0	0	0.863107	0	0	0	0	0	0	0	0	0	0	0	0	0	0	0	0	0	0	0	0	0
hsa-mir-3167	0	0	0	0	0	0	0	0	0	0	0	0	0	0	0	0	0	0	0	0	0	0	0	0	0	0	0	0	0	0	0	0	0	0	0	0	0	0	0	0	0	0	0	0	0	0	0	0	0
hsa-mir-3168	0	0	0	0	0	0	0	0	0	0	0	0	0	0	0	0	0	0	0	0	0	0	0	0	0	0	0	0	0	0	0	0	0	0	0	0	0	0	0	0	0	0	0	0	0	0	0	0	0
hsa-mir-3169	0	0	0	0	0	0	0	0	0	0	0	0	0	0	0	0	0	0	0	0	0	0	0	0	0	0	0	0	0	0	0	0	0	0	0	0	0	0	0	0	0	0	0	0	0	0	0	0	0
hsa-mir-3170	1.34355	0.538086	1.94709	2.55024	0.876125	2.1386	0.126884	1.67661	2.48633	2.88395	0.807771	0.367374	2.67241	3.20122	0	0.870418	1.40467	2.5523	1.06313	1.11391	0.851499	2.02637	0.572121	1.98601	2.00942	2.17901	3.48082	1.60757	0.532417	0	2.55797	2.42172	2.20067	2.30386	0.869361	0.678994	2.8902	0.733401	1.85919	0.577625	0.866159	1.22434	1.08119	2.31301	0	0.41047	0.194339	0.720654	2.59432
hsa-mir-3171	0	0	0	0	0	0	0	0	0	0	0	0	0	0	0	0	0	0	0	0	0	0	0	0	0	0	0	0	0	0	0	0	0	0	0	0	0.249311	0	0	0	0	0	0	0	0	0	0	0	0
hsa-mir-3173	0.943099	0.293986	1.34359	1.62373	0.273647	0	0.533935	0.677277	0	0	0	0	0	0	1.20754	0	0	0.856743	0	0	1.38336	1.50806	0	0.578763	0.812745	1.26985	0	0	0.290631	0	0	0	0	1.50469	0.732472	0.84909	1.43176	0.870418	0.766222	0	0.219786	0.341756	1.22585	1.40808	0	0.114074	0.518636	0.282115	1.86374
hsa-mir-3174	0	0	0.525446	0	0.273647	0	0.413983	0	0	0	0	0.367374	0	0	1.20754	0	0	0	1.39736	0.473115	0	0.691319	0	1.31075	0.812745	0	0.885202	0	0.739437	0.500352	1.20394	0.627385	0.59822	0.837988	0.869361	0.263444	1.43176	0	0.232909	0.135506	0.410474	0.341756	1.08119	0	0.263288	0.114074	0.194339	0.720654	1.54579
hsa-mir-3175	0	0	0	0	0	0	0	0	0	0	0	0	0	0	0	0	0	0	0.627355	0	0	0	0	0	0	0	0	0	0	0	0	0	0	0	0	0	0.46182	0	0.433392	0	0	0	0	0	0	0	0	0	0.310287
hsa-mir-3176	0.386867	0	0.525446	0	0.273647	0.441747	0.111221	0.262681	0.655751	1.18672	0	0	0.675559	0	0	0	0	1.39061	1.06313	0	0.851499	1.15673	0	0	0.462865	1.26985	1.42977	0.495159	0.290631	0.871148	0.724074	0	0	0.837988	0.41223	0.486129	0.811106	0	0.232909	0.135506	0.578873	0	1.35732	0	0	0.219784	0	0.282115	0.565507
hsa-mir-3177	0.386867	0.293986	0.286513	0	0	0	0	0	0	0	0	0	0	0	0	0	0	0	0	0	0	0	0	0.990691	0	0	0.885202	0	0	0	0	0	0	0.336305	0.41223	0	0	0.221121	0	0.135506	0	0	0	0	0	0	0	0.282115	0.782292
hsa-mir-3178	0	0	0	0	0	0	0.126884	0	0.655751	0	0	0.367374	0	0	0	0	0	0	0	0	0.851499	0	0	0.990691	1.09412	0.770352	0	0	0	0	0	0	0	0.608844	0.220789	0.263444	0.46182	0	0.232909	0	0	0	0	0	0	0	0	0	0
hsa-mir-3179-1	0	0	0	0	0	0	0	0	0	0	0	0	0	0	0	0	0	0	0	0	0	0	0	0	0	0	0	0	0	0	0	0	0	0	0	0	0	0	0	0	0	0	0	0	0	0	0	0	0
hsa-mir-3179-2	0	0	0	0	0	0	0	0	0	0	0	0	0	0	0	0	0	0	0	0	0	0	0	0	0	0	0	0	0	0	0	0	0	0	0	0	0	0	0	0	0	0	0	0	0	0	0	0	0
hsa-mir-3179-3	0	0	0	0	0	0	0	0	0	0	0	0	0	0	0	0	0	0	0	0	0	0	0	0	0	0	0	0	0	0	0	0	0	0	0	0	0	0	0	0	0	0	0	0	0	0	0	0	0
hsa-mir-3179-4	0	0	0	0	0	0	0	0	0	0	0	0	0	0	0	0	0	0	0	0	0	0	0	0	0	0	0	0	0	0	0	0	0	0	0	0	0	0	0	0	0	0	0	0	0	0	0	0	0
hsa-mir-3180-1	0	0	0	0	0	0	0	0	0	0	0	0	0	0	0	0	0	0	0	0	0	0	0	0.990691	0	0	0	0	0	0	0	0	0	0	0	0	0	0	0	0	0	0	0	0	0	0	0	0	0
hsa-mir-3180-2	0	0	0	0	0	0	0	0	0	0	0	0	0	0	0	0	0	0	0	0	0	0	0	1.79404	0	0	0	0	0	0	0	0	0	0	0	0	0	0	0	0	0	0	0	0	0	0	0	0	0
hsa-mir-3180-3	0	0	0	0	0	0	0	0	0	0	0	0	0	0	0	0	0	0	0	0	0	0	0	0.578763	0	0	0.885202	0	0	0	0	0	0	0	0	0	0	0	0	0.135506	0	0	0	0	0	0	0	0	0
hsa-mir-3180-4	0	0	0	0	0	0	0	0	0	0	0	0	0	0	0	0	0	0	0	0	0	0	0	0	0	0	0	0	0	0	0	0.627385	0	0.608844	0	0	0	0	0	0	0	0	0	0	0	0	0.365581	0	0
hsa-mir-3180-5	0	0	0	0	0	0	0	0	0	0	0	0	0	0	0	0	0	0	0	0	0	0	0	0	0	0	0	0	0	0	0	0	0	0	0	0	0	0	0	0	0	0	0	0	0	0	0	0	0
hsa-mir-3181	0	0	0	0	0	0	0.111221	0	0	0	0	0	0	0	0	0	0	0	0	0	0	0	0	0	0	0	0	0	0	0	0	0	0	0	0	0	0	0	0	0	0	0	0	0	0	0	0	0	0
hsa-mir-3182	0	0	0	0	0	0	0	0	0	0	0	0	0	0	0	0	0	0	0	0	0	0	0	0	0	0	0	0	0	0	0	0	0	0	0	0	0	0	0	0	0	0	0	0	0	0	0	0	0
hsa-mir-3183	0	0.293986	0	0	0	0	0	0	0	0	0	0	0.675559	0	0.726588	0	0	0	0	0	0	0	0	0	0	0	0	0	0	0	0.406994	0	0	0	0	0	0	0	0.232909	0	0	0	0	0	0	0	0.194339	0	0
hsa-mir-3184	0	0	0	0	0	0	0	0	0	0	0	0	0	0	0	0	0	0	0	0	0	0	0	0	0	0	0	0	0	0	0	0	0	0	0	0	0	0	0	0.135506	0	0	0	0	0	0	0	0	0
hsa-mir-3185	0	0	0	0	0	0	0	0	0	0	0	0	0	0	0	0	0	0	0	0	0	0	0	0	0	0	0	0	0	0	0	0	0	0	0	0	0	0	0	0	0	0	0	0	0	0	0	0	0
hsa-mir-3186	0	0	0	0	0	0	0	0	0	0	0	0	0	0	0	0	0	0	0	0	0	0	0	0	0	0	0	0	0	0	0	0	0	0	0	0	0.46182	0	0	0	0	0	0	0	0	0	0	0	0.310287
hsa-mir-3187	0	0.293986	1.57396	0.429697	0	0	0.126884	0.677277	0.655751	0.712084	0	0	0	1.24259	1.20754	0	0	0	0	0	0.851499	0.691319	0	0	0	1.26985	0	0	0	0	0	0	0.59822	1.03568	0.41223	0.486129	1.78756	0.221121	0.609383	0	0	0.617859	0.739388	0.732515	0	0	0.365581	0	0
hsa-mir-3188	0	0	0	0	0	0	0	0	0.655751	0	0	0	0	0	0	0	0	0	0.627355	0	0	0.691319	0	0.990691	0	0	0	0	0	0.871148	0	0	0	0.336305	0.220789	0.486129	0.249311	0.581993	0	0.135506	0.219786	0.341756	0	0	0	0	0.657	0.517984	0.782292
hsa-mir-3189	0.386867	0.293986	0.730372	0	0.503572	0	0.126884	0	0	0.712084	0.459696	0.367374	1.13385	0	0	0	0.86694	2.08535	0	0.473115	1.38336	1.79037	0	0	1.09412	0.770352	0	1.39939	0	1.16586	0	0	1.34571	1.36464	1.10942	0	0.647008	0	0	0	0.578873	0.849514	0.290608	0	0	0	0	0.282115	0.565507
hsa-mir-3190	0.386867	0	1.06932	0	0	0	0.229065	0.262681	0.655751	0.712084	0	0	0.675559	0	0	0	0.497633	0	0	0	0	0	0	0	0.462865	0	0	0.495159	0.532417	0	0	0.627385	0	1.03568	0	0	0.249311	0	0.609383	0	0	0.341756	0.532378	0.412258	0	0	0.365581	0.517984	0.310287
hsa-mir-3191	0	0	1.34359	0	0	0.441747	0.533935	0.262681	0.655751	0	0.459696	0	0	0	0	0.351701	0.497633	0.856743	0.627355	0	0.851499	0.691319	0.572121	0	0	0	0	0.863107	0	0	0	0	0	0.837988	0.220789	0	0.46182	0	0.433392	0.25937	0	0.617859	0.532378	0.732515	0.263288	0	0	0.517984	0.310287
hsa-mir-3192	0	0	0.286513	0.429697	0	0.237715	0	0	0	0	0	0	0	0	0	0	0	0	0	0	0	1.15673	0.572121	0	0	0	0	0	0	0	0.406994	0	0	0.336305	0	0	0.249311	0.221121	0	0	0	0	0	0.412258	0	0	0	0	0
hsa-mir-3193	0.386867	0	0.909778	0.429697	0	0.237715	0.214479	0.262681	0.655751	0.712084	0	0.659931	0.675559	0.751135	0	0	0	0	0	0	0	0.691319	0	0	0.462865	0	0	0.495159	0	0	0.724074	0	0	0.608844	0.220789	0	0.46182	0.581993	0.232909	0.25937	0	0.341756	0	0.994435	0	0.114074	0.657	0	0.782292
hsa-mir-3194	1.34355	0.293986	0	1.25569	0	0.620465	0.426694	0.484822	0	0.712084	0.459696	0	0	0	1.20754	0	0.497633	1.39061	0.627355	0	0	0.691319	0.572121	0.990691	0.462865	0.770352	1.42977	1.60757	0.290631	0	2.38873	0	1.01984	1.20951	0.581218	0	1.70649	0.221121	2.33046	0	0.219786	0	1.22585	1.21603	0.485863	0.318275	0.194339	1.19903	0.970717
hsa-mir-3195	0	0.293986	0	0	0	0	0	0	0	0	0	0	0	0	0	0	0	0	0	0	0	0	0	0	0	0	0	0	0	0	0	0	0	0	0	0.486129	0	0	0.232909	0	0	0	0	0	0	0.219784	0	0	0
hsa-mir-3196	0	0	0.286513	0	0.273647	0.237715	0.111221	0	0	0	0	0	0	0	0	0	0	1.39061	0	0	0	0.691319	0	0	0	0	1.42977	0.495159	0	0	0	0	0	1.03568	0	0.263444	0	0	0	0	0	0	0	0	0	0	0	0	2.20142
hsa-mir-3197	0	0	0.525446	0	0	0	0	0.262681	0	0	0	0	0	0	0	0	0	0	0	0	0	0	0	0	0	0	0	0	0	0	0	0	0.59822	0.336305	0	0	0	0	0	0	0.219786	0	0	0	0	0	0	0	0
hsa-mir-3198-1	0	0	0	0.429697	0	0	0.126884	0	0	0	0	0	0.675559	0	0	0	0	0	0	0	0	0	0	0	0	0.770352	0	0	0	0	0	0	0	0	0	0	0	0	0	0	0	0	0	0	0	0	0	0	0
hsa-mir-3198-2	0	0	0	0	0.273647	0	0	0	0	0	0	0	0	0	0	0	0	0.856743	0	0	0	0	0	0	0	0	0	0	0	0	0	0	0.59822	0	0	0	0	0	0	0	0.219786	0.341756	0	0	0	0	0	0	0
hsa-mir-3199-1	0	0.538086	0.525446	0.760351	0.273647	0.237715	0.439294	0	0.655751	0	0	0.367374	0.675559	0.751135	0	0.351701	0	0	0	0.473115	0.851499	0	0	0	0	0	0	0.495159	0.290631	0	0	0	0	0	0.41223	0.486129	0.249311	0.733401	0.766222	0.373436	0.410474	0.341756	0.532378	0.412258	0.485863	0.114074	0.518636	0.720654	0
hsa-mir-3199-2	0.386867	0.538086	0.909778	0.429697	0	0.779466	0.426694	0.262681	1.44695	0.712084	0.459696	1.11104	0.675559	0	0	0.634248	0.86694	0.856743	0	1.11391	0	0	0.980694	0.578763	0	1.26985	0	0.863107	1.58908	0.871148	0.724074	1.06317	0	0.608844	1.57746	1.26447	1.21442	1.2173	1.03648	0.373436	0.866159	1.04907	1.08119	0.412258	1.00076	0.656229	1.44911	0.898329	0.782292
hsa-mir-32	6.49981	4.47548	5.13142	5.82932	5.2625	4.87291	4.65664	4.45741	4.44067	4.82991	4.1302	3.3205	5.59036	5.70691	6.0404	3.62277	4.02149	5.2594	5.32986	3.74624	5.69141	6.69578	5.37144	5.87645	5.46347	6.84066	5.99276	5.22664	4.51546	5.12903	6.4651	4.81957	6.59359	5.78343	6.09743	4.69166	6.0666	5.75057	5.88245	4.24207	4.46361	5.11601	6.09578	6.62317	3.9649	4.602	4.9539	5.48682	5.27324
hsa-mir-3200	1.91378	0.929102	2.96539	1.02917	1.62695	1.65512	0.765612	1.58355	1.95501	3.31243	1.08798	0.659931	2.8016	2.35013	1.20754	0.870418	2.35585	2.5523	2.26697	0.473115	0.851499	2.70771	1.29873	2.89072	2.13897	3.98362	3.36699	3.19999	0.739437	2.24215	3.51468	2.42172	1.61136	4.83615	1.65527	1.48701	2.6512	1.31658	1.15472	2.08739	1.31095	1.22434	3.24487	1.72917	1.00076	0.41047	1.72561	2.00851	3.11745
hsa-mir-3201	0	0	0	0	0	0	0	0	0	0	0	0	0	0	0	0	0	0	0	0	0	0	0	0	0	0	0	0	0	0	0	0	0	0	0	0	0	0	0	0	0	0	0	0	0	0	0	0	0
hsa-mir-3202-1	0	0	0	0	0	0	0	0	0	0	0	0	0	0	0	0	0.497633	0	0	0	0	0	0	0	0	0	0	0	0	0	0	0	0.59822	0	0	0	0	0	0.232909	0	0	0	0.290608	0	0	0.114074	0	0	0
hsa-mir-3202-2	0	0	0.286513	0.760351	0	0	0	0.262681	0	0	0	0	0	0.751135	0	0	0	0	0	0	0	0.691319	0	0	0.462865	0	0	0	0	0	0	0	0	0	0.220789	0	0	0	0	0	0	0	0	0	0	0	0	0	0
hsa-mir-320a	8.90554	8.56657	10.2004	9.5089	8.29115	9.94387	9.63953	9.81262	9.05563	9.53635	9.56512	8.7547	8.69027	9.17551	9.33955	9.94382	9.99963	10.8784	9.51683	9.78906	9.05061	9.91705	7.95563	10.5545	9.37612	9.87584	10.2515	10.668	10.0885	10.3362	9.42635	9.35832	9.98189	10.8584	10.5663	9.74223	9.27287	9.33057	10.5099	9.05873	10.1873	9.44511	10.8622	9.5364	9.68837	9.30059	9.23782	9.87695	10.2718
hsa-mir-320b-1	3.11915	1.70497	2.79319	2.04354	0.876125	2.50009	1.82706	2.19998	2.15465	2.61008	1.85868	1.29279	1.48111	2.69263	2.78502	2.70515	2.10271	3.80479	3.10873	1.89403	2.32823	3.66453	2.55264	5.02628	2.81812	3.44355	3.48082	4.69922	2.66816	3.5064	3.67051	2.26704	3.55959	3.61921	2.16117	2.26498	2.13603	1.57902	2.93691	1.70708	2.04497	2.16185	4.84154	1.86637	1.26392	1.21193	1.66129	2.62841	2.80712
hsa-mir-320b-2	3.43851	1.97757	3.6093	2.92449	0.701841	2.25145	2.03968	2.67628	3.08418	3.56668	2.00073	0.659931	2.5305	4.00257	3.67638	3.55661	2.92416	4.99168	3.81491	2.03732	2.89433	4.45298	2.29091	5.9703	3.71203	4.47057	3.68463	5.07716	3.37481	4.35644	4.59337	3.28039	4.87094	4.40694	3.15992	2.32389	3.21725	1.86798	3.69084	1.52159	2.92266	3.0848	5.49062	3.16002	1.92712	1.61211	1.84623	3.36275	3.58951
hsa-mir-320c-1	1.91378	0.746801	0.525446	0	0.876125	0.779466	0.633753	0.998941	0	0	0	0.367374	0	0	0.726588	0.870418	0.86694	1.39061	0.627355	0.473115	0	1.15673	0	0.990691	0	0	2.13359	1.60757	0.532417	0.871148	1.20394	1.06317	1.83562	0.608844	0.581218	1.00123	1.0921	0.221121	0.232909	0	0	0	2.12013	0.412258	0.485863	0.41047	0.518636	1.32874	0.782292
hsa-mir-320c-2	0.691626	0	0.286513	0.429697	0.273647	0	0.510245	0.262681	0.655751	0	0.459696	0	0	0	0	1.25116	0.86694	0.856743	0.627355	0	0	0.691319	0.572121	1.98601	1.53176	1.26985	0	1.39939	0.290631	1.16586	0.724074	0	1.83562	1.50469	0.41223	0.84909	0.647008	0.221121	0.609383	0.135506	0.219786	0.617859	2.38956	0	0	0.497126	0.365581	0.720654	1.13735
hsa-mir-320d-1	0.691626	0.293986	0.286513	0.429697	0.273647	0.779466	0.111221	0	1.95501	0.712084	0	0	1.13385	0	0	1.07331	0.497633	1.39061	1.89672	0	0	2.40689	0.980694	2.307	0.462865	1.64018	0	1.39939	1.22592	1.41047	1.71433	0	1.34571	1.63234	0.99438	0	0.958431	0.221121	0.433392	0.479139	0.990857	0.341756	2.19235	0.412258	0.263288	0.318275	0.194339	0.282115	0.782292
hsa-mir-320d-2	0.943099	0	0.525446	0.760351	0	0	0	0.484822	0	0.712084	0	0.367374	0.675559	1.24259	0.726588	1.40946	0	1.7794	0	0.473115	0.851499	0.691319	1.29873	2.15542	1.32947	0.770352	1.42977	1.78946	1.78865	1.16586	1.71433	0	0.59822	1.03568	0.41223	0.486129	0.647008	0.221121	0.609383	0.479139	0.219786	0	1.4778	0.412258	0.678643	0.219784	0.194339	0.517984	0.782292
hsa-mir-320e	0	0	0.286513	0.429697	0	0	0.126884	0.262681	0	1.82891	0	0	1.48111	0	0	0	0	0	0	0.473115	0	0	0.572121	1.31075	0.462865	0	0	0	1.08125	0	0.406994	0	0	0	0	0	0.46182	0.221121	0.609383	0	0.410474	0	0.290608	0	0	0.114074	0.194339	0	0.310287
hsa-mir-323a	2.70839	2.40448	3.95415	2.71176	1.62695	1.81054	1.02322	1.99841	2.33	2.06724	2.88348	0.903046	2.8016	2.83755	1.20754	2.4375	2.66781	3.05285	1.89672	1.55607	0.851499	2.70771	3.42414	2.89072	2.56501	2.17901	3.2434	1.39939	1.47788	1.96418	2.29603	3.28039	1.34571	2.76031	3.77963	2.92813	2.25483	1.73072	2.17122	2.2752	2.44444	3.0848	2.9014	3.16002	0.485863	1.40359	1.84623	2.46872	3.3727
hsa-mir-323b	1.34355	2.05808	5.41011	3.99267	1.80996	1.05293	1.04811	2.13587	4.04761	3.11404	1.70111	1.11104	3.02973	3.20122	2.3011	2.36204	3.07281	2.90449	2.91395	0.828799	2.72915	2.56513	4.09266	3.23123	3.16089	2.87797	4.41471	1.60757	2.32687	2.85168	2.09058	4.40301	3.12229	3.73751	2.99015	1.76727	1.52927	0.733401	3.12249	2.18435	2.30727	2.78252	3.891	2.10691	0	1.26229	1.59398	2.77217	3.9446
hsa-mir-324	6.08844	5.06812	6.22949	5.73849	5.19007	4.9668	4.52989	4.9798	5.07895	5.75403	3.96669	3.36178	5.27145	5.16345	5.18408	4.6607	4.83779	5.74716	5.42439	3.47128	4.60448	5.37761	2.55264	4.8646	5.23621	5.77168	5.28969	6.13343	3.91265	4.84677	5.79256	4.81957	5.0382	6.58544	5.55376	5.55699	6.14944	4.75517	5.97778	4.83662	4.76369	5.5943	6.00846	6.30489	3.00133	4.06311	5.05122	5.93172	6.18003
hsa-mir-325	0	0	0	0	0	0	0	0	0	0	0	0	0	0	0	0	0	0	0	0	0	0	0	0	0	0	0	0	0	0	0	0	0	0	0	0	0	0	0	0	0	0	0	0	0	0	0	0	0
hsa-mir-326	2.5658	2.63192	4.57578	4.47015	2.04715	1.81054	1.01483	2.19998	2.87377	2.27173	2.00073	0.903046	2.5305	2.35013	3.67638	2.50921	2.66781	3.62682	2.56134	2.39757	3.17692	3.92024	0.572121	4.11168	4.58945	3.24309	4.16514	5.02368	1.69231	3.916	3.29276	3.57231	3.12229	4.87539	4.1988	4.48777	3.38294	4.39522	4.76979	3.1975	4.11199	4.30092	3.97529	4.84721	1.13833	2.04496	5.15413	3.33214	4.31877
hsa-mir-328	3.39699	3.62072	6.06408	6.19992	3.28867	3.72032	3.00653	3.84602	5.00331	3.91071	4.3047	2.93924	3.22666	4.22967	4.17175	4.51153	4.70739	4.61573	4.02259	3.66028	3.51814	2.95649	1.7797	4.56707	3.94247	4.2741	4.85558	3.54181	2.32687	4.26608	5.15168	4.40301	4.16647	5.44387	4.56412	5.28038	5.70901	4.48332	5.54079	5.02294	5.43054	6.10069	5.31575	4.7966	2.53731	3.78171	5.4055	5.25353	4.81326
hsa-mir-329-1	0.943099	1.36858	1.06932	0.429697	0.876125	0.779466	0.600484	0.677277	0.655751	0	0.459696	0	0.675559	0.751135	0.726588	0	0.86694	0	0	1.35186	0	0	0.572121	0.578763	0	0	1.42977	0.495159	0.739437	0	0.983867	0	0	0.608844	1.31518	0.486129	0.46182	0.581993	0.232909	0.25937	0.578873	0.617859	0.290608	0.994435	0.485863	0.497126	0.365581	0.517984	0.782292
hsa-mir-329-2	0.386867	1.48964	1.46337	0	0.701841	0.922669	0.822479	0.998941	0.655751	0	0.459696	0.903046	0	0	0	0	0.497633	0.856743	0.627355	0.473115	0	0	0.572121	0.578763	1.09412	0.770352	0	0.495159	0	0.871148	0.406994	1.06317	0	0.837988	1.72909	0.486129	0.647008	0.412811	0.232909	0.838204	0.729655	0.341756	0.532378	0.412258	0.678643	0.318275	0.518636	0.720654	1.28672
hsa-mir-330	5.00282	3.86407	6.80095	5.41394	4.72688	4.45664	5.11652	5.05106	5.69037	4.86193	4.24885	4.15544	3.75932	4.78876	5.42298	4.61267	4.81686	6.38744	5.11991	4.2661	4.69686	5.37761	2.55264	6.09012	5.96071	5.94694	5.19278	3.97647	5.30777	5.00414	4.63181	4.73356	4.81936	6.25937	5.68939	5.7194	5.08796	5.3547	5.15745	5.57527	5.29802	5.28378	6.45994	6.29884	4.26448	4.53702	5.92702	5.47985	6.24993
hsa-mir-331	4.98892	3.35993	5.68113	5.67132	3.37833	3.95504	4.13688	4.33427	4.74925	4.37735	2.80819	2.33915	4.49184	4.89195	5.28443	3.77599	4.25727	5.22853	5.20759	2.92557	4.50577	5.06962	2.96604	4.68248	5.22166	5.4839	5.89347	4.9299	3.65593	4.38535	5.53303	5.20767	5.22817	5.6838	3.91232	4.47483	6.05437	3.833	5.54621	3.80726	4.38625	4.60021	5.04051	5.36994	1.8491	2.99888	4.35523	5.06162	5.40163
hsa-mir-335	7.97882	6.27839	7.33818	8.18341	7.6168	8.31635	5.13443	5.65327	6.16548	7.03548	5.33634	5.12641	5.59036	6.22451	7.78781	5.10449	5.08541	7.76502	7.12269	6.59206	7.4223	6.75446	8.40832	6.47338	7.05548	6.3726	7.01011	6.68018	6.29355	6.0096	7.69336	5.29033	6.89706	7.64378	7.13348	5.32432	5.87122	4.58639	8.43232	6.46032	5.70992	4.66244	7.0661	4.81367	4.07182	3.88976	4.68943	6.81583	7.31406
hsa-mir-337	5.12229	5.80538	7.07693	5.08578	5.40443	4.97504	3.36413	5.83081	5.42649	4.76367	5.48879	4.05833	4.56646	5.66867	3.24965	4.61267	4.45987	4.61573	4.24611	5.39708	2.07639	3.86044	3.2132	5.04797	5.87031	3.8488	6.88129	5.37636	3.37481	4.16968	5.31413	5.11999	3.55959	5.2385	6.56628	6.60234	4.07431	5.43974	5.65053	5.40801	6.21392	5.62588	6.49605	5.60379	4.5984	5.19808	6.16306	4.76198	6.11159
hsa-mir-338	10.9451	8.6436	7.7016	11.3613	12.5578	11.6725	8.49129	11.3231	9.99531	10.6261	9.91666	10.1313	9.25727	10.8709	8.82051	8.18968	9.91229	10.145	8.47198	9.66351	10.7556	11.736	9.94273	10.5729	9.69925	8.1568	7.53645	12.1521	10.6189	10.6628	8.90916	9.68196	10.6435	9.64736	9.79181	10.3456	11.2566	10.0393	8.01331	8.30527	9.58159	9.72758	8.07391	9.51764	8.5797	7.73717	10.2824	9.37185	10.9306
hsa-mir-339	5.79277	4.96749	4.90684	7.10173	5.42562	5.85255	5.09896	5.52775	4.19086	4.33236	4.03433	2.56805	5.62569	4.00257	5.07622	3.62277	4.1609	5.76878	4.24611	3.41989	3.7077	5.1215	4.71747	5.28558	4.51979	6.01149	5.22581	5.44578	3.57719	4.29684	5.80102	4.7628	4.81936	5.78343	6.12161	6.71117	6.53416	6.28887	6.42287	4.52726	5.17856	5.94039	7.08282	7.70086	3.86932	4.4636	6.58754	5.90597	5.54199
hsa-mir-33a	6.39298	2.73348	4.10911	7.54395	4.07667	4.95851	2.53528	3.03376	5.05417	5.77099	2.46023	2.16351	5.53569	5.58901	5.15786	2.4375	4.05762	6.22489	5.34927	2.7701	4.69686	6.75446	4.42235	5.88852	5.83251	6.59952	5.2581	6.13343	4.41338	5.37944	6.37733	3.19715	5.9813	6.68818	4.85537	4.72483	5.40941	5.15455	6.6361	4.13293	3.80739	5.036	6.06725	7.28047	1.48641	2.62845	5.01951	6.50878	5.14214
hsa-mir-33b	3.31019	1.60132	3.29095	3.37402	1.41731	1.81054	0.664097	0.484822	1.10492	3.40225	0.807771	0	1.7608	2.1426	3.24965	0.351701	2.57113	2.90449	2.42165	0	3.29985	4.64245	0.980694	3.7376	4.25982	5.41398	3.86318	3.43662	1.08125	2.57887	3.19346	1.89678	4.3594	4.11071	2.21355	1.48701	3.30247	2.21538	3.61034	1.12548	0.410474	2.53888	3.40541	3.69015	0	0.866154	1.52336	2.81708	3.3727
hsa-mir-340	4.72938	4.16605	4.0719	4.51462	4.58343	3.63969	4.28028	3.97987	3.77184	2.61008	4.27704	3.98095	4.0468	4.12058	5.01911	3.29779	4.02149	4.17231	4.40293	3.47128	3.04254	4.23481	4.24855	3.50652	3.97753	4.2205	3.77667	3.54181	3.27855	3.45278	4.21721	2.68877	3.68016	4.37079	5.68939	4.17225	4.84448	4.03601	4.27771	3.95198	3.72	3.81738	4.87484	4.26245	5.04587	4.02716	3.77501	3.78058	4.61562
hsa-mir-342	6.17081	7.86636	7.08395	7.92994	7.17271	6.96111	8.57546	6.8484	7.34094	6.53755	5.93169	5.57563	7.23174	6.35063	8.95411	6.32608	6.83632	7.32143	6.45306	5.86887	6.31884	7.05048	4.76989	7.07949	6.94908	6.59952	7.56899	6.26983	5.82766	6.96045	7.3572	6.48858	5.3783	7.25737	8.49326	7.33873	8.31163	6.77688	7.65791	5.9184	6.67532	7.48182	7.85916	8.34497	6.29429	6.3983	7.17759	7.15227	8.09206
hsa-mir-345	4.71255	3.59396	4.46533	4.44739	2.6849	3.77798	2.3589	3.43104	4.23561	4.28591	3.02322	1.45419	2.8016	4.00257	3.24965	2.50921	3.0004	4.51699	2.6887	2.16766	4.39981	4.67753	2.29091	4.40846	4.25982	5.20906	5.71887	4.33952	2.0442	3.08101	5.46013	3.69875	4.16647	4.79581	4.97399	4.33862	5.72967	2.86676	4.75114	2.96254	3.85738	4.50151	4.33567	5.87168	0.678643	2.15567	3.72868	4.97511	5.74281
hsa-mir-346	0	0	0.286513	0	0.273647	0.441747	0	0.262681	0.655751	0	0	0	0	0	0	0.351701	0	0	0	0.473115	0	0	0	0	0.812745	0.770352	0	0	0	0	0.406994	0	0	0.336305	0.220789	0	0	0	0.232909	0.479139	0.410474	0	0	0.412258	0	0	0.365581	0.282115	0.565507
hsa-mir-34a	9.4895	6.85573	7.38254	9.10023	7.34198	7.36229	7.55794	7.39364	6.66001	6.82423	7.05217	6.8668	7.55404	7.57155	7.65352	5.85472	6.84668	7.42037	8.63108	6.50843	6.5593	8.06835	6.31916	8.38012	6.52614	7.43619	9.14241	6.89396	6.86272	6.87641	5.71412	7.51101	8.17113	7.67562	8.07536	7.42367	8.25486	7.49495	8.31975	6.16008	7.45884	7.03534	7.98139	8.39118	6.36608	6.76317	7.40696	7.02168	7.69599
hsa-mir-34b	2.22978	0.538086	1.57396	0.760351	0.701841	1.48091	1.3762	0.677277	1.44695	0.712084	0.459696	0.367374	1.99497	0.751135	1.85554	1.55211	1.16072	1.7794	0	0.473115	0.851499	0.691319	0	0.990691	0.462865	0	1.42977	1.15603	1.22592	0.871148	0.406994	1.06317	0.59822	0	0.869361	0.486129	1.93719	0.412811	1.26401	0.988978	0.990857	1.22434	1.69223	1.21603	0.678643	0.866154	0.365581	1.92892	1.86374
hsa-mir-34c	3.94999	1.8923	1.57396	1.91671	2.73101	2.25145	2.26581	1.84647	2.62736	2.4508	1.85868	1.59933	2.8016	2.69263	1.56762	2.36204	1.61328	2.5523	1.39736	3.82736	1.38336	1.79037	0.572121	2.44417	1.86708	0	3.36699	2.22814	2.90151	2.10985	1.71433	0.627385	1.61136	2.22505	3.83083	3.13968	3.48369	1.11068	3.20704	2.74668	3.09926	2.16185	3.4938	2.49332	2.48668	2.93822	1.20025	1.65982	2.20142
hsa-mir-3529	0	0.293986	0	0	0	0	0	0	0	0	0	0	0	0	0	0	0	0	0	0	0	0	0	0	0	0	0	0	0	0	0	0	0	0.336305	0	0	0	0	0	0	0	0	0	0	0	0	0.365581	0	0
hsa-mir-3591	0.386867	0	0	0	0	0	0	0	0	0	0	0	0	0	0	0	0	0	0	0	0	0	0	0	0	0	0	0.495159	0	0	0	0	0	0	0	0	0	0	0	0	0	0	0	0	0	0.114074	0	0	0.310287
hsa-mir-3605	1.65666	1.09093	2.17473	1.45141	1.03161	1.1724	0.913765	1.58355	2.62736	2.7535	1.52419	0.903046	3.02973	1.90013	2.3011	2.19813	2.35585	2.90449	2.91395	1.89403	2.07639	2.02637	0.572121	2.68465	2.73858	3.13135	3.2434	1.78946	1.3574	1.80213	2.47583	2.56141	2.49176	2.30386	1.10942	1.13884	1.32718	1.31658	1.92723	1.52159	1.79428	1.65002	1.69223	1.72917	0.848674	0.656229	2.01014	1.92892	1.86374
hsa-mir-3606	0	0	0	0	0	0.237715	0	0.484822	0	0	0.807771	0	0	0	0	0	0	0	0	0	0	0	0	0	0	0.770352	0	0	0	0	0	0	0	0	0	0	0	0.221121	0	0	0	0	0	0	0.263288	0	0	0	0
hsa-mir-3607	5.08355	6.5495	7.48162	8.85206	4.58343	4.61266	3.35319	4.65332	6.95586	6.688	4.1302	4.63112	6.91934	6.8465	7.42528	5.93503	6.66537	6.31581	7.82695	3.66028	8.89599	7.92244	9.6503	7.67141	7.35788	7.6641	8.26898	6.68593	6.29765	6.92643	6.1644	6.94283	8.84023	7.39649	6.66363	6.94964	7.58139	5.13428	7.5501	6.28194	6.04443	7.16997	7.34883	7.34353	0.263288	4.7593	5.8389	6.71266	7.36535
hsa-mir-3609	0.386867	0.293986	0.286513	1.02917	0.876125	0.237715	0	0.262681	0	0	0	0	0	0	0	0	0	0	0	0	0	0	0.572121	0.990691	0	0	0	0	0	0	0	0	0.59822	0	0.581218	0.263444	1.21442	0	0	0.135506	0	0.341756	0	0.412258	0	0	0	0	0.782292
hsa-mir-361	8.72961	8.65497	8.27864	8.22415	8.27373	8.16161	8.47816	8.85897	7.62369	7.39404	7.45526	7.24052	7.72667	7.49713	7.93015	7.33444	7.1897	7.57562	7.43121	7.22164	6.92667	7.76417	7.01671	7.62887	7.38751	7.56005	8.40858	7.29847	7.24028	7.13229	7.60434	6.8505	8.03926	8.09952	8.84726	8.50786	9.23408	8.16186	8.26903	8.22207	8.08676	8.30322	8.88494	8.48073	8.17445	7.90207	8.43372	8.18623	8.48595
hsa-mir-3610	0.386867	1.23642	0.909778	1.45141	0.701841	0.620465	0.522139	0.262681	0.655751	0	0	0.367374	0.675559	0	0	0.870418	0.497633	0.856743	0	1.35186	0.851499	1.50806	0	1.31075	1.32947	0	0.885202	0	1.3574	1.16586	1.56341	1.66859	1.34571	1.36464	1.40801	0.678994	1.43176	0	1.78778	0.988978	0.866159	0.849514	1.22585	0.994435	0.678643	0.578869	1.44911	1.32874	1.13735
hsa-mir-3611	0.386867	0	0	0.429697	0	0	0	0	0.655751	0	0	0	0	0	0	0	0	0	0	0	0	0.691319	0	0	0	0	0	0	0	0	0	0	0	0	0.220789	0	0.647008	0	0.433392	0	0	0	0.532378	0	0	0	0	0.282115	0.782292
hsa-mir-3612	0	0	0	0	0	0	0	0	0	0	0	0	0	0	0	0	0	0	0	0	0	0	0	0	0	0	0	0	0	0	0	0	0	0	0	0	0	0	0	0	0	0	0	0	0	0	0	0	0
hsa-mir-3613	3.8914	2.46479	3.70961	6.27294	3.92623	4.18554	3.0731	3.43104	3.83137	3.78276	2.46023	2.63693	4.3299	4.37923	5.25999	2.10861	2.4675	3.62682	3.35902	2.5001	4.74093	4.98814	2.7741	4.70995	4.3157	5.12404	5.76454	4.9869	2.81265	3.74811	4.77608	3.0147	4.16647	4.44221	5.00404	2.32389	4.3526	3.473	5.09965	3.34461	3.73791	3.37232	5.18025	4.74415	2.4342	2.25848	2.78914	4.33785	3.85174
hsa-mir-3614	2.77473	2.27572	3.08226	2.71176	0.701841	1.28273	3.25365	2.13587	2.98281	1.82891	2.95504	2.33915	2.19638	2.69263	3.88256	1.55211	1.95727	2.08535	3.63684	2.16766	3.04254	3.16862	0	2.307	2.56501	3.53422	2.79268	1.95097	2.56312	2.67565	0.406994	3.0147	3.28324	2.58204	2.45022	2.20356	3.80901	2.40779	1.54953	1.47124	1.65044	2.94157	2.19235	3.16002	1.26392	2.40014	3.18193	2.3515	2.4112
hsa-mir-3615	3.51813	2.05808	2.88186	4.08404	2.63726	2.3561	1.63239	2.5343	1.44695	1.54325	1.52419	1.11104	1.99497	2.35013	2.09545	1.80098	1.16072	2.90449	0.627355	0.473115	1.77109	1.79037	0.980694	2.44417	0.812745	1.93461	1.42977	1.95097	1.08125	0.500352	2.29603	1.66859	2.20067	4.06619	1.72909	2.00184	2.99632	1.86798	3.85704	1.41907	2.35446	3.0848	3.0252	3.72665	1.13833	1.21193	2.6959	3.36275	2.59432
hsa-mir-3616	0	0.293986	0	0	0	0	0	0	0	0	0	0	0.675559	0	0	0.351701	0	0	0	0	0	0	0	0.990691	0	0	0	0	0	0	0.983867	0	0	0	0.581218	0	0	0.412811	0	0	0	0	0	0.732515	0.485863	0	0.194339	0	0
hsa-mir-3617	0.386867	0.293986	0	0	0	0	0.111221	0	0	0	0	0	0	0	0	0	0.497633	0.856743	0	0	0	0	0	0.578763	0	0	0	0	0	0	0	0	0	0	0	0	0	0	0	0	0.219786	0	0.290608	0.732515	0	0	0	0	0
hsa-mir-3618	0.386867	0.293986	0.909778	0.429697	0	0.237715	0	0	0	0	0	0	0	0	0	0	0	0	0	0	0.851499	1.50806	0	0	1.09412	0.770352	0.885202	0	0.290631	0	0	0	0	0.336305	0.220789	0	0.249311	0	0.232909	0.373436	0	0	0	0.412258	0	0	0	0	1.42206
hsa-mir-3619	0.386867	0	1.77255	1.25569	0	0.620465	0.126884	0.484822	0	0.712084	0	0.659931	0.675559	0.751135	0	0	0.497633	0	0.627355	0	0	1.15673	0	0.578763	0.462865	1.26985	0	0	0.290631	0.871148	0	0	0.59822	1.74961	0	0.263444	1.32718	0.412811	0.766222	0.25937	0.219786	0	0	0	0	0	0	0	1.76534
hsa-mir-362	5.54921	4.47548	2.96539	5.22612	5.30885	5.25091	4.779	4.97064	4.40192	4.69425	2.88348	3.40192	6.61101	3.49143	4.61882	3.17086	2.92416	3.9632	4.84706	3.78737	3.51814	4.90177	2.7741	4.65448	3.33323	4.2741	4.81274	4.42451	4.16682	3.55809	3.08681	2.80578	5.73911	3.87292	5.15228	3.88982	5.22525	3.71057	3.92518	3.11791	4.13919	3.64314	4.62378	4.18586	2.84931	3.86554	3.03738	5.14324	3.77795
hsa-mir-3620	0.386867	0	0.286513	0	0	0	0.3514	0.262681	0	0	0	0.367374	0	0	0	0.351701	0	0	0	0	0	0	0	0	0	0	0	0	0.290631	0	0	0	0	0.608844	0	0	0	0	0.433392	0	0.578873	0	0.920387	0	0.263288	0	0.365581	0	0.565507
hsa-mir-3621	0	0	0	0	0	0	0	0	0	0	0	0	0	0	0	0	0	0	0	0	0	0	0	0	0	0	0	0	0	0	0	0	0	0	0	0	0	0	0	0	0	0	0	0	0	0	0	0	0
hsa-mir-3622a	0	0.293986	0.286513	0	0	0	0	0	0	0	0	0	0	0	0	0	0.497633	0	0.627355	0	0	0	0	0	0	0	0	0	0.290631	0	0.406994	0	0	0.336305	0.732472	0	0	0	0.433392	0	0.578873	0	0	0	0.263288	0.219784	0.194339	0	0
hsa-mir-3622b	0	0	0	0	0	0	0	0	0	0	0.459696	0	0	0	0	0	0	0	0	0	0	0	0	0	0	0	0	0	0	0	0	0	0	0	0	0	0	0	0	0	0	0	0	0	0	0	0	0	0
hsa-mir-363	4.51325	2.20676	3.00541	1.77764	1.97234	1.95083	2.31652	1.92444	2.33	2.27173	3.70134	3.14243	2.67241	2.96923	2.64103	2.50921	3.44433	1.7794	5.42439	3.41989	0.851499	2.02637	2.29091	5.83963	2.00942	2.38795	1.82418	3.19999	1.3574	2.93224	4.82666	2.68877	1.61136	1.36464	4.00439	3.03778	4.33922	1.86798	2.22628	2.38807	3.28121	3.51407	1.87887	3.89648	0.848674	2.98395	4.19409	3.61244	1.28672
hsa-mir-3646	0.386867	0	0	0	0	0.441747	0	0	0	0	0	0.367374	0	0	0	0	0	0	0	0	0.851499	0	0	0	0	0	0	0	0	0	0.724074	0	0	0.336305	0	0	0.46182	0	0	0	0	0	0.290608	0	0	0	0	0.517984	0.310287
hsa-mir-3648-1	0	0	0	0	0	0	0	0	0	0	0	0	0	0	0	0	0	0	0	0	0	0	0	0	0	0	0	0	0	0	0	0	0	0	0	0	0	0	0	0	0	0	0	0	0	0	0	0	0
hsa-mir-3648-2	0	0	0	0	0	0	0	0	0	0	0	0	0	0	0	0	0	0	0	0	0	0	0	0	0	0	0	0	0	0	0	0	0	0	0	0	0	0	0	0	0	0	0	0	0	0	0	0	0
hsa-mir-3649	0	0	0	0	0	0	0	0	0	0	0	0.367374	0	0	0	0	0	0	0	0	0	0	0	0	0	0	0	0	0	0	0	0	0	0	0	0	0	0	0	0	0	0	0	0.412258	0	0	0	0	0
hsa-mir-3650	0	0	0	0	0	0	0	0	0	0	0	0	0	0	0	0	0	0	0	0	0	0	0	0	0	0	0	0	0	0	0	0	0	0	0	0	0	0.221121	0	0	0	0.341756	0.739388	0	0	0	0	0	0
hsa-mir-3651	2.8989	3.4221	1.21296	1.45141	2.73101	2.19613	0.973867	0.998941	1.10492	1.54325	0.807771	0.367374	0.675559	2.35013	1.56762	0	0.497633	0.856743	1.06313	0	0	0.691319	0.572121	0.990691	1.53176	2.38795	0.885202	0.495159	0	1.41047	0.724074	0	0.59822	1.74961	1.57746	0.84909	1.0921	1.31658	0.609383	0.135506	0.219786	0.849514	0	1.86637	0	0.318275	0.89933	1.92892	1.42206
hsa-mir-3652	1.15718	0.929102	0.909778	2.78621	2.2508	1.28273	0.229065	0.484822	1.10492	0.712084	0.807771	0.659931	0.675559	0.751135	2.09545	0.634248	1.16072	2.33763	1.66854	1.35186	3.51814	1.79037	0.980694	1.79404	2.81812	2.57041	2.13359	1.15603	0	1.41047	0.983867	1.89678	1.83562	2.37859	0.732472	1.00123	2.25483	0	1.78778	0.91556	0.729655	1.65002	1.4778	1.72917	0.678643	0.578869	1.37083	0.898329	2.75679
hsa-mir-3653	3.26475	3.95098	3.47323	5.59052	3.78036	3.39143	2.17461	2.96163	3.26777	2.4508	1.70111	1.45419	2.37309	3.30458	2.64103	2.4375	2.35585	3.05285	2.6887	2.03732	3.87523	3.35352	5.13215	3.56785	3.03338	3.53422	4.09537	3.26288	1.96394	2.47512	2.70943	3.63691	3.12229	3.73751	4.64263	2.76763	4.16812	2.36204	3.26077	2.24554	2.30727	3.17296	3.5221	3.4493	1.26392	1.35801	2.37345	3.30086	3.3727
hsa-mir-3654	0.386867	0.746801	0	0.429697	1.41731	0.441747	0	0.677277	0	0	0	0.367374	0	0	0	0	0	0.856743	0	0	2.72915	2.22914	0	0	0.462865	0.770352	0	0	0.290631	0	0.724074	0	0	1.20951	0.220789	0	0	0	0.766222	0	0	0	0	0	0	0.114074	0	0	0.970717
hsa-mir-3655	0	0.538086	0.525446	2.04354	0.273647	0	0	0	1.10492	0	0.807771	0.367374	0.675559	0	0.726588	0	0	0	0	0	0	0	0	0	0	0.770352	0	0.495159	0.532417	0.500352	0.406994	0	0.59822	0.608844	0.41223	0.486129	0.647008	0.221121	0.433392	0	0	0.341756	0	0	0	0.318275	0.194339	0.282115	0
hsa-mir-3656	0	0	0.286513	0.429697	0.273647	0	0.126884	0	0	0	0	0	0	0	0	0	0	0	0	0.473115	0	0	0	0	0	0	0	0	0	0	0.406994	0	0	0.336305	0	0	0	0	0	0	0	0	0	0	0	0	0.365581	0	0
hsa-mir-3657	0.386867	0	0	0	0	0	0	0	0	0	0	0	0	0	0	0	0	0	0	0	0	0	0	0	0.462865	0.770352	0	0	0	0	0	0	0	0	0	0	0.249311	0	0	0	0	0	0	0	0	0	0	0	0
hsa-mir-3658	0	0	0	0	0	0	0	0	0	0	0	0	0	0	0	0	0	0	0	0	0	0	0	0	0	0	0	0	0	0	0	0	0	0.336305	0	0	0	0	0	0	0	0	0	0	0	0	0	0	0
hsa-mir-3659	0	0	0.286513	0	0	0	0	0	0	0	0	0	0	0	0	0	0	0	0	0	0	0	0	0	0	0	0	0	0	0	0	0	0	0	0	0	0	0	0	0	0	0	0	0	0	0	0	0	0
hsa-mir-365a	5.46131	4.35318	5.74753	4.81056	4.36687	5.38682	4.8881	5.89031	4.95059	4.98332	5.94053	4.72902	4.63741	5.60934	4.45622	5.3969	5.41283	4.95443	5.7651	5.46203	2.54257	4.36963	3.42414	6.15151	5.26488	5.91355	6.17293	4.24921	4.01577	5.88358	5.01294	5.40606	3.20501	4.9385	4.89601	6.3705	4.7465	6.62537	4.7227	4.82664	5.44696	5.5456	5.03069	5.98149	4.56217	4.83611	6.89428	5.39354	6.09649
hsa-mir-365b	5.49121	4.35318	5.71169	4.81056	4.33736	5.41131	4.88361	5.91439	4.97719	4.98332	5.94932	4.71316	4.56646	5.58901	4.41253	5.41568	5.44046	4.95443	5.8493	5.46203	2.54257	4.36963	3.35719	6.13133	5.26488	5.89656	6.15589	4.21781	4.03554	5.88358	4.9983	5.40606	3.28324	4.963	4.88797	6.35292	4.76664	6.62052	4.7227	4.80648	5.43603	5.5456	5.00084	6.00397	4.57435	4.83195	6.89603	5.35599	6.06581
hsa-mir-3660	0	0	0	0	0	0	0	0	0	0	0	0	0	0.751135	0	0	0	0	0	0	0	0	0	0	0	0	0	0	0	0	1.39484	0	0	0	0	0	0	0	0	0	0	0	0	0	0	0	0	0	0
hsa-mir-3661	0	0	0	0	0	0	0	0	0	0	0	0	0	0	0	0	0	0	0	0	0	0	0	0	0	0	0	0	0	0	0	0	0	0	0	0	0	0	0	0.135506	0	0	0	0	0	0.114074	0	0	0
hsa-mir-3662	0.691626	0.293986	0	1.25569	1.03161	1.1724	0.913765	1.13635	0	0	0	0	0.675559	0.751135	0	0	0	0	0.627355	0	1.38336	1.50806	0	1.31075	0.462865	0.770352	0.885202	0	0.739437	0	0.724074	0	0.59822	0.336305	0.41223	0.263444	0.46182	0	0.766222	0.988978	0	0	0.290608	0	0	0.219784	0	0.720654	0.565507
hsa-mir-3663	0.386867	0	0	0	0	0	0	0	0	0	0	0	0	0	0	0	0	0	0	0	0	0	0	0	0	0	0	0	0	0	0.406994	0	0	0	0	0	0	0.221121	0	0	0	0	0	0	0	0	0	0	0
hsa-mir-3664	1.15718	0.293986	0.909778	0	0.273647	0.620465	0.126884	0.847055	1.10492	1.18672	0	0	1.99497	1.6085	0	0	0.497633	0	1.39736	0	0.851499	2.02637	0.572121	0.990691	1.09412	0	1.42977	0.863107	0	0	1.20394	0	1.34571	1.50469	0.581218	0	1.21442	0	1.03648	0.135506	0.219786	1.04907	0.290608	0.732515	0	0.114074	0.194339	0	0.782292
hsa-mir-3665	0	0	0	0	0	0	0	0	0	0	0	0	0	0	0	0	0	0	0	0	0	0	0	0	0	0	0	0	0	0	0	0	0	0	0	0	0	0	0	0	0	0	0	0	0	0	0	0	0
hsa-mir-3666	0	0	0	0	0	0	0	0	0	0	0	0	0	0	0	0	0	0	0	0	0	0	0	0	0	0	0	0	0	0	0	0	0	0	0	0	0	0	0	0	0	0	0	0	0	0	0	0	0
hsa-mir-3667	0.691626	0	0.286513	0	0.273647	0	0.338005	1.13635	0	0	0	0.367374	0	0.751135	0.726588	0	0	0	0	0	0.851499	2.95649	0	2.44417	3.22065	0	0	0	0.290631	0	0	0.627385	0	0	0.581218	0.486129	0	0	0.433392	0.135506	0.219786	0	0	0.412258	0	0.114074	0.365581	0	1.65973
hsa-mir-3668	0	0	0	0	0	0	0	0	0	0	0	0	0	0	0	0	0	0	0	0	0	0	0	0	0	0	0	0	0	0	0	0	0	0	0	0	0	0	0	0	0	0	0	0	0	0	0	0	0
hsa-mir-367	0	0	0	0	0	0	0.126884	0	0	0	0	0	0	0	0	0	0	0	0	0	0	0	0	0	0	0	0	0	0	0	0	0	0	0	0	0	0	0	0	0	0	0	0	0	0	0	0	0	0
hsa-mir-3670-1	0	0	0	0	0	0	0	0	0	0	0	0	0	0	0	0	0	0	0	0	0	0	0	0	0	0	0	0	0	0	0	0	0	0	0	0	0	0	0	0	0	0	0	0	0	0	0	0	0
hsa-mir-3670-2	0	0	0	0	0	0	0	0	0	0	0	0	0	0	0	0	0	0	0	0	0	0	0	0	0	0	0	0	0	0	0	0	0	0	0	0	0	0	0	0	0	0	0	0	0	0	0	0	0
hsa-mir-3670-3	0	0	0	0	0	0	0	0	0	0	0	0	0	0	0	0	0	0	0	0	0	0	0	0	0	0	0	0	0	0	0	0	0	0	0	0	0	0	0	0	0	0	0	0	0	0	0	0	0
hsa-mir-3670-4	0	0	0	0	0	0	0	0	0	0	0	0	0	0	0	0	0	0	0	0	0	0	0	0	0	0	0	0	0	0	0	0	0	0	0	0	0	0	0	0	0	0	0	0	0	0	0	0	0
hsa-mir-3671	0	0	0	0	0	0	0	0	0	0	0	0	0	0	0	0	0	0	0	0	0	0	0	0	0	0	0	0	0	0	0	0	0	0	0	0	0	0	0	0	0	0	0	0	0	0	0	0	0
hsa-mir-3672	0	0	0	0	0	0	0	0	0	0	0	0	0	0	0	0	0	0	0	0	0	0	0	0	0	0	0	0	0	0	0	0	0	0	0	0	0	0	0	0	0	0	0	0	0	0	0	0	0
hsa-mir-3674	0	0	0	0	0	0	0	0	0	0	0	0	0	0	0	0	0	0	0	0	0	0	0	0	0	0	0	0	0	0	0	0	0	0	0	0	0	0	0	0	0	0	0	0	0	0	0	0	0
hsa-mir-3675	0	0	0	0	0	0	0	0	0	0	0	0	0	0	0	0	0	0	0	0	0	0	0	0	0	0	0	0	0	0	0	0	0	0	0	0	0	0	0	0	0	0	0	0	0	0	0	0	0
hsa-mir-3677	3.21783	2.52268	3.38496	3.638	3.09068	2.40571	1.49195	2.26136	3.57692	3.40225	2.64467	1.29279	2.37309	3.20122	4.00527	1.55211	3.3308	4.41099	3.19707	2.03732	2.32823	3.79804	0	4.02685	3.09854	5.20906	4.67602	2.75118	1.87896	3.55809	3.19346	2.42172	2.94111	4.3337	4.39299	2.53809	3.38294	2.86676	4.83323	3.31636	3.64608	2.32466	3.82438	2.40598	1.13833	2.4874	2.90477	4.4129	3.92194
hsa-mir-3678	1.15718	0	0.525446	0	0.273647	0.237715	0.243505	0	1.10492	0	0	0.367374	0	0	0.726588	0	0	0	2.09369	0	0	1.15673	0.980694	1.57254	0	1.26985	0	0.495159	0.532417	1.41047	0.406994	0.627385	0	0.608844	0.581218	1.13884	0	0.221121	0	0	0	0.617859	0.290608	1.21603	0	0.114074	0.657	0.517984	0.782292
hsa-mir-3679	1.34355	0	0.286513	0	0	0.441747	0.126884	0	0	0.712084	0	0	0	0	0	0	0	0	0.627355	0	0	1.15673	0	0	0	0	0	0.495159	0.290631	0	0	0	0.59822	0	0.41223	0.263444	0	0	0.433392	0	0	0	0	0.994435	0	0	0	0	0.970717
hsa-mir-3680-1	0.386867	0	0	0	0	0.620465	0	0	0	0	0	0	0.675559	0.751135	0.726588	0	0.497633	1.39061	0	0	0	0	0	0	0	0.770352	0	0	0	0.500352	0.406994	0	0	0.608844	0.220789	0.486129	0.647008	0	1.26401	0	0.219786	0.341756	0.290608	0	0	0	0.194339	0.898329	0.310287
hsa-mir-3680-2	0.386867	0.538086	0.730372	0.429697	0	0	0.243505	0.262681	0	0	0	0	0	0	0	0	0	0	0	0	0	0.691319	0	0.578763	0.462865	0	0	0	0	0	0.406994	0	0	0.336305	0.220789	0	0.249311	0	0	0.135506	0	0	0.290608	0	0	0.114074	0.194339	0.282115	0.565507
hsa-mir-3681	0	0	0	0	0	0	0	0	0	0	0	0.659931	0	0	0.726588	0	0	0	0	0	0	0	0	0	0	0	0	0	0	0	0	0	0	0	0.220789	0	0	0	0	0	0	0	0	0	0	0	0	0	0
hsa-mir-3682	1.34355	0	1.57396	0.429697	0.503572	0.922669	0.510245	0.998941	1.44695	0	0.459696	0.659931	0	0.751135	1.20754	0.351701	1.40467	0.856743	0	0.828799	0	1.15673	0	1.31075	1.53176	0.770352	0.885202	1.95097	1.69231	0.500352	1.39484	0.627385	0	0.608844	0.99438	0.263444	1.21442	0.221121	1.26401	0.25937	0.729655	1.22434	0.920387	1.21603	0.485863	0.219784	0.657	0.720654	1.65973
hsa-mir-3683	0	0	0	0	0	0	0	0	0	0	0	0	0	0	0	0	0	0	0	0	0	0	0	0	0	0	0	0	0	0	0	0	0	0	0	0	0	0	0	0	0	0	0	0	0	0	0	0	0
hsa-mir-3684	0	0.538086	0.730372	0.760351	0.503572	0	0.229065	0.484822	0	0	0	0.367374	0.675559	0	0	0	0.497633	0.856743	0	0	0	0	0	0	0.812745	0	0.885202	0.495159	0	0.871148	0	0	0	0.336305	0.41223	0	0.249311	0	0.433392	0.25937	0.219786	0.341756	0.290608	0	0	0.114074	0	0	0.565507
hsa-mir-3685	0.386867	0	0	0	0	0	0.243505	0	0	0	0	0	0	0	0	0	0.497633	0	0	0	0	0	0	0	0	0	0	0	0	0	0	0	0	0	0	0	0	0	0	0	0	0	0	0	0	0	0	0	0
hsa-mir-3686	0	0	0	0	0	0	0	0	0	0	0	0	0	0	0	0	0	0	0	0	0	0	0	0	0	0	0	0	0	0	0	0	0	0	0.220789	0	0	0	0	0	0	0	0	0	0	0	0	0	0
hsa-mir-3687-1	0	0	0	0	0	0	0	0	0	0	0	0	0	0	0	0	0	0	0	0	0	0	0	0	0	0	0	0	0	0	0	0	0	0	0	0	0	0	0	0	0	0	0	0	0	0	0	0	0
hsa-mir-3687-2	0	0	0	0	0	0	0	0	0	0	0	0	0	0	0	0	0	0	0	0	0	0	0	0	0	0	0	0	0	0	0	0	0	0	0	0	0	0	0	0	0	0	0	0	0	0	0	0	0
hsa-mir-3688-1	0.386867	0	0.525446	0	0	0	0	0.262681	0	0	0	0	0.675559	0.751135	0	0.351701	0	0.856743	0	0	0	0	0	0	1.09412	0	0	0.495159	0	0	0	0	0	0	0	0	0	0	0.232909	0	0	0	0.532378	0	0	0	0	0	0
hsa-mir-3688-2	0	0	0.286513	0	0	0	0	0	0	0	0.459696	0	0	0	0	0	0	0	0	0	0	1.15673	0	0	0.462865	0	0	0	0	0	0	0	0	0	0.220789	0.263444	0	0	0	0.25937	0	0	0	0	0	0	0	0	0.310287
hsa-mir-3689a	0	0	0	0	0	0	0	0	0	0	0	0	0	0	0	0	0	0	0	0	0	0	0	0	0	0	0	0	0.290631	0	0	0	0	0	0	0	0	0	0	1.30869	0	0	0	0	0	0	0	0	0.310287
hsa-mir-3689b	0	0	0	0	0	0	0	0	0	0	0	0	0	0	0	0	0	0	0	0	0	0	0	0	0	0	0	0	0	0	0	0	0	0	0	0	0	0	0	1.61732	0	0	0	0	0	0	0	0	0.310287
hsa-mir-3689c	0	0	0	0	0	0	0	0	0	0	0	0	0	0	0	0	0	0	0	0	0	0	0	0	0	0	0	0	0	0	0	0	0	0	0	0	0	0	0	0	0	0	0	0	0	0	0	0	0
hsa-mir-3689d-1	0	0	0	0	0	0	0	0	0	0	0	0	0	0	0	0	0	0	0	0	0	0	0	0	0	0	0	0	0	0	0	0	0	0	0	0	0	0	0	0	0	0	0	0	0	0	0	0	0
hsa-mir-3689d-2	0	0	0	0	0	0	0	0	0	0	0	0	0	0	0	0	0	0	0	0	0	0	0	0	0	0	0	0	0	0	0	0	0	0	0	0	0	0	0	0	0	0	0	0	0	0	0	0	0
hsa-mir-3689e	0	0	0	0	0	0	0	0	0	0	0	0	0	0	0	0	0	0	0	0	0	0	0	0.578763	0	0	0	0	0	0	0	0	0	0	0	0	0	0	0	1.61732	0	0	0	0	0	0	0	0	0.310287
hsa-mir-3689f	0	0	0	0	0	0	0	0	0	0	0	0	0	0	0	0	0	0	0	0	0	0	0	0	0	0	0	0	0	0	0	0	0	0	0	0	0	0	0.232909	1.61732	0	0	0	0	0	0	0	0	1.28672
hsa-mir-369	4.51325	4.66735	4.77414	3.42151	4.50598	4.38424	3.12469	4.80531	3.83137	3.91071	4.55552	3.14243	1.7608	4.55721	3.03596	2.82241	3.0004	3.71854	3.10873	3.97709	3.04254	4.18692	4.66308	3.15333	4.28803	4.04659	4.72305	3.13423	3.27855	3.33918	3.33996	4.24619	2.73386	3.58806	5.84691	4.15612	2.8902	3.473	3.65115	3.31636	4.39756	3.61194	4.51534	4.18586	4.24937	3.46442	3.59734	3.68692	5.16162
hsa-mir-3690-1	0.943099	0.538086	1.34359	1.02917	1.03161	0	0.426694	0.998941	1.95501	0.712084	0	0.367374	1.7608	1.24259	2.09545	0.351701	0.497633	0	0.627355	0.828799	0	0	0.572121	0.578763	0.462865	0	1.42977	0	0	0	0.724074	0	0	0.608844	0.869361	0	1.0921	0.221121	1.26401	0.988978	0.219786	0.617859	1.87887	0.412258	0.485863	0.219784	0.194339	0	0.782292
hsa-mir-3690-2	0	0	0	0	0	0	0	0	0	0	0	0	0	0	0	0	0	0	0	0	0	0	0	0	0	0	0	0	0	0	0	0	0	0	0	0	0	0	0	0	0	0	0	0	0	0	0	0	0
hsa-mir-3691	0.691626	0.293986	0.525446	0.760351	0.701841	0.237715	0.522139	0.847055	1.10492	0.712084	0	0	0	0	0.726588	0.351701	0.497633	1.7794	0.627355	0.473115	0	0	0	1.98601	0.812745	1.26985	0	0	0.920445	0	0.406994	0.627385	0	0.608844	0.41223	0.486129	0	0.733401	0.609383	0.135506	0.219786	0	0.290608	0	0.485863	0	0.365581	0.898329	0
hsa-mir-3692	0	0	0	0	0	0	0	0	0	0	0	0	0	0	0	0	0	0	0	0	0	0	0	0	0	0	0	0	0	0	0	0	0	0	0	0	0	0	0	0	0.219786	0	0	0	0	0	0	0	0
hsa-mir-370	3.79879	3.7716	5.202	3.75385	3.75826	2.63101	2.20294	3.86592	4.19086	3.00358	4.88358	3.58738	3.47931	4.12058	2.78502	3.45132	3.69432	3.80479	3.10873	3.97709	1.38336	2.83746	2.13978	3.15333	4.25982	3.53422	4.72305	2.91679	2.71795	2.57887	3.38566	4.24619	2.02966	3.97279	4.42666	3.10651	2.25483	2.05211	3.69084	3.56469	3.50682	3.29585	4.05493	2.21364	2.67936	2.80868	2.59622	3.2362	4.21075
hsa-mir-3713	0	0	0	0	0	0	0	0	0	0	0	0	0	0	0	0	0	0	0	0	0	0	0	0	0	0	0	0	0	0	0	0	0	0	0	0	0	0	0	0	0	0	0	0	0	0	0	0	0
hsa-mir-3714	0	0	0	0	0	0	0	0	0	0	0	0	0	0	0	0	0	0	0	0	0	0	0	0	0	0	0	0	0	0	0	0	0	0	0	0	0	0	0	0	0	0	0	0	0	0	0	0	0
hsa-mir-371a	0	0	0	0	0	0	0	0	0	0	0.459696	0	0	0	0	0	0	0	0	0	0	0	0	0.990691	0	0	0	0	0	0	7.3076	0	0.59822	0	0	0	0	0	0.433392	0	0	0	0	0	0	0	0	0	0
hsa-mir-371b	0	0	0.730372	0.429697	0	0.237715	0.126884	0	0	0	0	0	0	0	0	0	0	0	0	0	0	0	0	0	0	0	0	0	0	0	0	0.627385	0	0.336305	0	0	0.46182	0	0.232909	0	0	0	0	0.412258	0	0	0	0	0.782292
hsa-mir-372	0	0	0	0	0	0.237715	0	0	0.655751	0	2.64467	1.73119	0.675559	0	0	0.351701	1.40467	1.7794	1.89672	0.828799	0	0.691319	0	2.44417	0	0	1.42977	0.863107	0.532417	1.61955	10.1697	2.26704	0	0	1.40801	0	0	0	1.15472	0.135506	0.729655	0	1.08119	0	0	0.497126	0	0.720654	0.310287
hsa-mir-373	0	0	0	0	0	0	0.126884	0	0	0	0	0	0	0	0	0	0	0	0	0	0	0	0	0.578763	0	0	0	0	0	0	7.49129	0	0.59822	0	0.220789	0	0	0	0.232909	0	0	0	0.290608	0	0.263288	0	0	0.282115	0
hsa-mir-374a	9.19694	9.54254	8.72384	9.4167	10.1331	9.78423	8.80611	9.71075	9.47038	8.94366	10.1113	10.3732	9.68748	9.73845	10.0994	9.07943	9.33361	8.79105	8.51128	9.65103	9.12316	10.2263	7.44516	9.41075	9.33699	9.42549	10.0438	8.99661	10.1746	9.54856	9.72081	8.98453	9.26214	9.304	10.2893	8.81687	10.5109	10.7313	10.2806	9.76922	10.1394	9.07933	10.3571	9.03417	9.08101	9.75755	9.13612	10.1505	9.1406
hsa-mir-374b	6.54327	6.85292	6.24629	6.71542	5.30885	5.48817	5.81015	5.66468	5.64132	5.66611	6.60644	5.95863	6.1713	5.98102	6.50298	5.4973	5.74746	5.34824	5.02655	5.69604	5.05202	6.93925	5.04975	6.25769	6.56124	6.20331	6.22286	5.59989	5.968	6.05529	6.47571	4.20417	6.36985	6.58544	7.80043	7.15422	7.03519	7.47494	6.8396	6.07201	5.92837	6.77156	7.24653	6.98517	5.88902	6.3083	7.2436	6.46006	7.30314
hsa-mir-374c	0.386867	0	0	0	0	0	0	0	0.655751	0	0	0	0	0	0	0	0	0	0	0	0	0	0	3.07099	4.67739	3.91779	0	0	1.08125	1.41047	3.55525	0.627385	4.62275	0	0.41223	0	0	0	0	0	0	0	0	0	0	0	0	0	0.310287
hsa-mir-375	15.6204	13.1253	13.9998	8.39298	14.3862	15.412	5.84449	12.8498	14.3827	14.5762	13.3365	15.3844	13.6041	12.5062	9.99492	12.1913	11.8592	13.7711	15.3521	14.6857	15.5285	14.5591	18.8823	10.1699	13.5391	13.1787	14.542	13.8212	11.5593	13.6763	12.9082	14.4447	14.8633	16.2831	16.5433	16.8094	14.3948	14.3939	12.0265	11.7889	15.0164	15.8691	13.3625	16.6874	11.8189	13.6783	15.9481	10.8504	15.6856
hsa-mir-376a-1	1.79094	2.20676	2.30871	1.45141	1.72135	1.88239	1.02322	1.67661	1.44695	1.82891	1.08798	0.903046	0.675559	2.35013	1.20754	0	1.16072	0	0	1.73492	0.851499	0	1.7797	1.31075	1.86708	0	1.82418	0.863107	0.739437	0.500352	1.39484	1.89678	1.01984	1.50469	3.6526	2.26498	1.52927	1.73072	1.26401	1.18917	1.98626	1.87695	2.76597	2.21364	0.848674	1.57275	1.59398	2.15563	2.70464
hsa-mir-376a-2	1.65666	0.538086	1.57396	0.760351	0.701841	0.237715	0	0.998941	0	0.712084	0.807771	0.659931	0.675559	1.90013	0.726588	0.634248	0.86694	0	0.627355	0	0	0.691319	0.572121	0	0.812745	0.770352	1.42977	0.863107	0.739437	0.500352	0.406994	0	0.59822	1.03568	3.04899	1.48701	0.958431	1.11068	0.232909	0.577625	0.410474	0.849514	1.22585	1.57754	0.485863	0.578869	0.657	0.898329	1.54579
hsa-mir-376b	2.48884	2.34153	2.02703	1.62373	2.2508	1.95083	1.32418	1.76404	1.44695	2.27173	2.24869	0.367374	1.13385	2.83755	2.3011	1.40946	1.61328	2.33763	1.66854	1.73492	1.77109	2.22914	0.572121	2.15542	2.13897	1.64018	2.95906	1.15603	1.58908	1.16586	2.19696	1.06317	1.34571	1.50469	3.04899	1.92781	1.32718	1.65686	2.33046	1.52159	2.208	0.849514	2.85765	2.86484	1.37945	1.31094	1.44911	2.28912	2.94836
hsa-mir-376c	4.08684	4.1105	3.70961	3.10985	3.80212	2.89694	2.10199	3.4575	2.48633	3.48681	3.37592	1.45419	2.37309	4.33108	2.91594	2.57753	2.66781	3.18736	3.28032	3.13127	1.77109	3.51739	3.13542	3.15333	4.3157	3.61953	4.09537	3.381	2.38966	2.24215	3.55525	2.26704	2.8412	2.64394	5.17227	4.0727	2.07274	3.7818	3.1794	2.12043	3.52756	2.07299	4.05493	4.07697	3.58636	2.98395	3.45283	3.1685	4.35306
hsa-mir-377	2.70839	3.51059	3.3543	2.26797	3.12562	2.67213	1.74523	2.63049	2.87377	0.712084	3.26766	1.11104	1.99497	3.08988	2.09545	1.6819	2.4675	2.90449	1.06313	2.84993	0	2.02637	2.7741	1.57254	3.03338	2.38795	3.9448	1.78946	1.69231	2.10985	2.29603	1.06317	1.61136	2.22505	4.53354	3.10651	1.43176	1.57902	2.33046	2.12043	2.79164	2.07299	3.75454	3.26302	2.48668	2.15567	2.5614	2.00851	3.11745
hsa-mir-378a	9.15241	11.3321	10.0125	10.7469	10.8561	9.40647	7.92702	8.8793	8.99834	8.72611	9.50007	9.12886	9.74383	8.71573	10.8906	8.96694	9.3132	10.5667	8.81158	9.03494	11.2267	11.5444	6.45342	9.30215	10.1954	10.835	10.9743	9.45874	8.08948	9.33087	9.15908	8.20274	9.824	10.9632	11.0191	10.6506	8.70503	9.23981	10.2213	8.32046	8.70792	10.6407	8.6366	10.2137	9.65508	8.48088	10.177	9.84003	10.1787
hsa-mir-378b	0	0	0.525446	0.429697	0	0	0	0	0	0	0	0	0	0	0	0	0	0	0	0	0	0	0	0	0	0	0	0	0	0	0.406994	0.627385	0	0.336305	0.220789	0	0	0	0.232909	0	0	0	0	0	0	0	0.657	0	0
hsa-mir-378c	3.11915	3.86407	3.4444	4.19752	4.68063	3.75901	3.11843	2.5343	3.35148	3.11404	4.19074	4.00721	4.37212	2.1426	4.06292	3.33773	3.2705	4.03632	3.69867	3.31127	5.15332	5.28965	1.29873	3.23123	4.3157	3.77635	5.2581	4.04964	3.02531	3.87582	2.77959	3.0147	4.32282	4.37079	3.74446	3.87019	3.18768	3.28966	3.33779	2.33274	2.56969	4.19962	2.50748	4.18586	3.40737	2.68492	3.81989	3.26889	3.3727
hsa-mir-378d-1	0.691626	0.746801	0	1.02917	0.503572	0.441747	0.214479	0	0.655751	0	0.807771	0.903046	0	0.751135	0.726588	0.634248	0.497633	0	0.627355	0.473115	0.851499	1.15673	0	0.578763	1.09412	1.64018	0	0	0	0.500352	0.406994	0.627385	1.01984	0.608844	0	0.678994	0.249311	0	0.609383	0.25937	0.410474	0	0.532378	0	0	0.41047	0.365581	0	0.565507
hsa-mir-378d-2	0	0.293986	1.46337	1.25569	0	0.620465	0.57787	0.262681	0.655751	0.712084	1.32251	0.367374	1.13385	0	1.20754	0.634248	1.16072	0.856743	0.627355	0	0.851499	1.50806	0	1.31075	0.812745	1.64018	0	0	0	0	0.406994	0	0.59822	0.837988	0.41223	0.678994	1.21442	0.581993	0.609383	0.373436	0.410474	0	0.290608	0.412258	0.263288	0.318275	1.10675	0.720654	0.565507
hsa-mir-378e	0	0	0	0	0	0	0	0	0	0	0	0	0	0	0	0	0	0	0	0	0	0	0	0	0	0	0	0	0	0	0	0	0	0	0	0	0	0	0	0	0.219786	0.341756	0	0	0	0	0	0	0
hsa-mir-378f	0	0	0	0.429697	0	0.441747	0	0	0	0	1.08798	0.659931	0	0	1.56762	0	0	0	1.06313	0	1.77109	1.79037	0.572121	1.31075	0	2.17901	2.13359	0.863107	0.739437	0.500352	0.406994	0.627385	1.61136	0.336305	0.41223	0.486129	0.249311	0	0	0.135506	0	0	0	0	0	0	0	0.282115	0.565507
hsa-mir-378g	0	0	0	0	0.273647	0	0	0	0	0	0	0	0	0	0	0	0	0	0	0	0	0	0	0.578763	0	0	0	0	0	0	0	0	0	0	0	0	0	0	0	0.135506	0	0.341756	0	0	0	0.114074	0.657	0	0
hsa-mir-378h	0	0.293986	0	0	0	0	0	0	0	0	0	0	0	0	0	0	0	0	0	0	0	0	0	0	0	0	0	0	0	0	0	0	0	0	0	0	0.249311	0	0	0	0	0	0	0	0	0	0	0	0
hsa-mir-378i	0	0.746801	0	0	0	0	0	0	0	0	0.459696	0	0	0	0	0	0	0.856743	0	0	0.851499	0.691319	0	0	1.53176	1.64018	0	0	0	0	0.406994	0	1.01984	0.608844	0.581218	0.263444	0.46182	0	0.433392	0	0	1.04907	0	0.412258	0	0	0	0	0
hsa-mir-378j	0	0	0	0	0	0	0	0	0	0	0	0	0	0	0	0	0	0	0	0	0	0	0	0	0	0.770352	0	0	0	0	0	0	0	0	0	0	0	0	0	0	0	0	0	0	0	0	0	0	0
hsa-mir-379	9.80533	10.2579	10.9392	9.31742	9.84808	8.66023	8.06565	9.89331	9.70231	9.41212	10.611	9.68959	8.93699	10.5393	9.03376	9.40612	9.6886	9.96707	8.34963	10.3951	8.02687	9.32133	9.41239	9.40446	10.0009	9.69973	10.7892	8.86343	9.52121	8.6713	9.32735	9.86165	8.00792	9.25958	11.0137	10.0381	7.9917	9.05493	9.31035	9.72155	9.52986	8.81654	9.80928	8.70655	9.95601	9.52325	9.90331	9.05434	10.2976
hsa-mir-380	0.386867	1.8923	1.67667	1.25569	1.41731	0.620465	0	1.2618	0.655751	0	1.08798	0.903046	0.675559	0	0.726588	0.634248	0.497633	1.7794	0.627355	1.55607	0	0	0	0.578763	2.25784	0.770352	0	0.863107	0	0.500352	0	0.627385	0	0	1.99156	1.84977	0.46182	0	0.232909	1.36493	1.10563	0.849514	1.08119	0	1.67912	0.866154	0.783247	0.517984	1.13735
hsa-mir-381	5.87823	6.23576	5.82225	5.23943	5.88928	5.27113	4.86727	6.11893	5.28462	5.38691	6.09899	5.23037	4.37212	6.02708	5.13116	5.21585	4.89882	6.16092	4.40293	5.54832	4.86558	5.71808	4.51739	5.00427	5.68119	5.41398	5.99276	4.50476	5.66585	4.82583	5.3259	4.81957	4.20718	4.68239	6.31979	6.60234	4.31208	5.47777	5.24003	5.56029	5.51603	5.31318	5.65937	4.68972	6.30529	5.46318	6.2311	5.1255	5.95857
hsa-mir-382	5.10949	5.05837	6.58023	4.9138	5.12248	3.79669	3.86915	5.11896	4.86772	4.42098	4.80829	3.55215	4.28641	5.24368	4.00527	4.28513	4.43261	4.83654	2.80571	4.43092	3.17692	4.13738	4.13324	4.26769	5.17711	4.60215	6.33307	3.93844	4.36733	3.65623	4.33837	5.1645	3.12229	4.91359	5.31095	3.92829	3.43419	2.83362	4.46102	4.9046	4.75492	3.54744	5.28305	3.35916	4.26448	3.87366	3.63131	4.48425	5.79362
hsa-mir-383	0	0.293986	0.525446	0	2.11828	0.441747	0.70641	0.484822	0.655751	0	1.32251	0.903046	0.675559	0	0	1.07331	0	0	0	0.473115	0	1.79037	0	0	0	0	0.885202	0	0	0.500352	0.724074	0.627385	0.59822	0	0.732472	1.38002	0.46182	1.65686	0.232909	0.479139	2.79164	0	0.290608	0.412258	0.848674	0.729651	2.01014	0.720654	0
hsa-mir-384	0	0	0	0	0	0	0	0	0	0	0	0	0	0	0	0	0	0	0	0	0	0	0	0	0	0	0	0	0	0	0	0	0	0	0	0	0	0	0	0	0	0	0	0	0	0	0	0	0
hsa-mir-3907	0	0	0	0	0	0	0	0	0	0	0	0	0	0	0	0	0	0	0	0	0	0	0	0	0	0	0	0	0	0	0	0	0	0	0	0	0	0	0	0	0	0	0	0	0	0	0	0	0
hsa-mir-3908	0	0	0	0	0	0	0	0	0	0	0	0	0	0	0	0	0	0	0	0	0	0	0	0	0	0	0	0	0	0	0	0	0	0	0	0	0	0	0	0	0	0	0	0	0	0	0	0	0
hsa-mir-3909	0.386867	0.293986	0.525446	1.02917	0.273647	0.237715	0.522139	0.262681	0.655751	0	0.459696	0.367374	0.675559	0	0	0.634248	0.497633	0	1.39736	0	0.851499	0	0	0.990691	0	1.26985	0.885202	0.495159	0.290631	0	0	1.06317	0.59822	0.336305	0.581218	0	0.46182	0.412811	0.766222	0.479139	0.219786	0.617859	0.532378	0.732515	0.678643	0.219784	1.10675	0.282115	1.28672
hsa-mir-3910-1	0.386867	0	0.909778	0	0	0	0	0	0	0	0	0	0.675559	0.751135	0	0.351701	0	0	0	0.828799	0	0	0	0	0	0	0	0	0	0	0.406994	0	0	0	0.220789	0	0.249311	0.221121	0.433392	0	0.729655	0	0	0.732515	0	0.114074	0	0.517984	0
hsa-mir-3910-2	0	0	0.286513	0.429697	0	0	0.111221	0	0	0	0	0	0	0	0.726588	0	0	0	0	0	0	0	0	0	0.462865	0	0	0	0.290631	0	0	0	0	0	0	0.263444	0.249311	0.581993	0	0.135506	0.219786	0	0.290608	0	0	0	0	0.517984	0
hsa-mir-3911	0.386867	0	0	0	0	0	0.111221	0.262681	0	0.712084	0	0	0	0	0.726588	0	0	0	0	0	0.851499	0	0	0	0	0	0	0	0	0	0	0	0	0	0	0	0	0	0	0	0	0	0	0	0	0.114074	0	0	0
hsa-mir-3912	0	0.293986	1.06932	0.429697	1.03161	0.237715	0.510245	0.677277	0	0.712084	0.459696	0.659931	0.675559	0	0.726588	0.870418	0	1.39061	1.66854	0.473115	0	0	0.572121	0	0	0	0	0	0.739437	0.500352	0	0	1.01984	0.837988	0.732472	0.678994	0.647008	0.581993	1.15472	0.479139	0.578873	0.849514	0.739388	0.412258	0.263288	0.41047	0.518636	0.517984	0.310287
hsa-mir-3913-1	1.79094	0.293986	1.21296	0.760351	1.17195	1.57064	0.956441	1.2618	1.10492	0	1.08798	0.903046	0.675559	0.751135	1.20754	0.870418	0	0	0.627355	0	1.77109	1.15673	0.572121	1.31075	0.462865	0	0.885202	0.495159	0.739437	0.500352	1.56341	0.627385	0.59822	0.336305	1.31518	1.00123	1.21442	0	0.609383	0.669814	0.866159	0.617859	1.35732	0.732515	0.678643	0.318275	0.194339	1.65982	0.565507
hsa-mir-3913-2	1.79094	1.09093	1.46337	1.45141	1.17195	1.28273	0.755571	1.48406	1.44695	0.712084	0	0	1.48111	0	0	0.870418	0.497633	0	0.627355	1.11391	2.32823	0.691319	0.980694	0.578763	0.462865	0	1.42977	0	0.532417	0.500352	2.09058	0.627385	1.01984	1.36464	1.40801	1.26447	1.6206	0.995543	0.433392	0.577625	0.866159	0.617859	1.08119	1.21603	0.678643	0.578869	0.518636	1.19903	0.782292
hsa-mir-3914-1	0	0	0	0	0	0	0	0	0	0	0	0	0	0	0	0	0	0	0	0	0	0	0	0	0	0	0	0	0	0	0	0	0	0	0	0.263444	0	0.221121	0	0	0	0	0	0	0	0.114074	0	0	0
hsa-mir-3914-2	0	0	0	0	0	0	0	0	0	0	0	0	0	0	0	0	0	0	0	0	0	0	0	0	0	0	0	0	0	0	0	0	0	0	0	0	0	0	0.232909	0	0	0.617859	0	0	0	0	0.194339	0	0
hsa-mir-3915	0	0	0	0	0	0	0	0	0	0	0	0	0	0	0	0	0	0	0	0	0	0	0	0	0	0	0	0	0	0	0	0	0	0	0	0	0	0	0	0	0	0	0	0	0	0	0	0	0
hsa-mir-3916	0	0	0	0	0	0	0	0	0	0	0	0	0	0	0	0	0	0	0	0	0	0.691319	0	0	0	0	0	0	0	0.500352	0	0	0	0	0	0	0	0	0.232909	0	0	0	0	0	0	0	0	0	0
hsa-mir-3917	1.50858	0.929102	0	2.16012	0.876125	0.620465	0	0.262681	0.655751	0	0	0.659931	0.675559	0.751135	0.726588	1.40946	0	0.856743	0	0	0	0.691319	0	1.57254	1.09412	1.26985	1.42977	0	0	0.871148	0.406994	2.09375	0	1.20951	1.65527	1.13884	1.32718	0	2.37986	1.12548	0.578873	0.617859	1.22585	1.57754	0.263288	0.656229	0.89933	1.19903	0.565507
hsa-mir-3918	0	0	0	0	0	0	0	0	0	0	0	0	0	0	0	0	0	0	0	0	0	0	0	0	0	0	0	0	0	0	0	0	0	0	0	0	0	0.221121	0	0	0	0	0	0.412258	0.263288	0	0	0	0
hsa-mir-3919	0	0	0	0	0	0	0	0	0	0	0	0	0	0	0	0	0	0	0	0	0	0	0	0	0	0	0	0.495159	0	0	0	0	0	0	0	0.263444	0	0	0	0	0	0	0	0	0	0	0	0	0
hsa-mir-3920	0	0.293986	0	0.429697	0.503572	0.441747	0.126884	0.262681	0	0	0	0	1.7608	0.751135	0	0.351701	0	0	0	0	0	0	0	0	0	0	0	0	0.532417	0	0.406994	0	0.59822	0.608844	0.41223	0.263444	0.46182	0	0	0.135506	0	0.341756	0.290608	0.732515	0.263288	0	0	0	0
hsa-mir-3921	0	0	0	0	0	0	0	0	0	0	0	0	0	0	0	0	0	0	0.627355	0	0	0	0	0	0	0	0	0.495159	0	0	0	0	0	0	0	0	0	0	0	0	0.410474	0	0	0	0	0	0	0	0
hsa-mir-3922	1.50858	0.538086	1.77255	1.62373	0.876125	1.05293	0.765612	0	0	0.712084	0.807771	0.903046	1.13385	0.751135	2.78502	0.351701	0	0.856743	0	0	0.851499	0.691319	0	1.98601	0.462865	0.770352	0	0	0.532417	0.871148	0	1.06317	0	0.336305	0.41223	0.486129	0.46182	0.733401	0.433392	0.756464	0.578873	0	0.920387	0	0.263288	0.219784	0.89933	0.898329	0.782292
hsa-mir-3923	0	0	0	0	0.273647	0.237715	0.111221	0	1.44695	0	0	0	0	0	0	0.351701	0	0	0	0	0	0	0	0	0	0	1.42977	0	0	0.871148	0	0	0	0	0	0	0	0	0.609383	0.135506	0	0	0	0	0	0.219784	0	0	0
hsa-mir-3924	0	0	0	0	0	0	0	0	0	0	0	0	0	0	0	0	0	0	0	0	0	0	0	0	0	0	0	0	0	0	0	0	0	0	0	0	0	0	0	0	0	0	0	0	0	0	0	0	0
hsa-mir-3925	0	0	0	0	0	0	0	0	0	0	0	0	0	0	0	0	0	0	0	0	0	0	0	0.578763	0	0	0	0	0	0	0	0	0	0	0	0	0.249311	0	0.232909	0	0	0	0	0	0	0	0	0	0
hsa-mir-3926-1	0	1.09093	0.286513	0	0	0.441747	0.126884	0.262681	0	0	0.459696	0.659931	0	0.751135	0	0.634248	0	0	0	0	0	0.691319	0	0.578763	0.462865	0	1.42977	0.495159	0	0.871148	0	0	0	0.837988	1.57746	0.486129	0.46182	0.733401	0.232909	0.577625	1.65044	0.341756	1.4778	0	1.13833	0.799516	0.657	0.898329	0
hsa-mir-3926-2	0	0.746801	0.909778	0	0.701841	0.237715	0	0.262681	1.10492	0.712084	1.32251	0.659931	1.13385	0.751135	0	1.07331	0.86694	0.856743	0	0.828799	0	0	0	0.578763	1.09412	0	0	0.495159	0.290631	0.500352	0	0	0	0.608844	1.49522	0.486129	0.811106	1.2173	0.609383	0.577625	1.21194	0.849514	1.35732	0	1.00076	1.35801	0.783247	0.517984	0.782292
hsa-mir-3927	0	0	0	0	0	0	0	0	0	0	0	0	0	0	0	0	0	0	0	0	0	0	0	0	0	0	0	0	0	0	0	0	0	0	0	0	0	0	0	0	0	0	0	0	0	0	0	0	0
hsa-mir-3928	1.65666	0.293986	2.4313	2.85701	0.876125	0.620465	0.695948	1.13635	0	0	0.459696	0.367374	1.13385	0.751135	1.56762	1.6819	1.61328	1.39061	0.627355	0.828799	2.72915	0.691319	0	2.44417	0.812745	2.17901	1.42977	2.46054	0.290631	2.24215	1.39484	0.627385	0.59822	2.22505	0.732472	0.678994	1.78756	0.412811	2.47386	0.91556	0.410474	1.04907	1.69223	0.732515	0	0.318275	0.89933	2.46872	2.47486
hsa-mir-3929	0	0	0	0	0	0	0	0	0	0	0	0	0	0	0	0	0	0	0	0	0	0	0	0	0	0	0	0	0	0	0	0	0	0	0	0	0	0	0	0	0	0	0	0	0	0	0	0	0
hsa-mir-3934	3.55634	1.48964	2.8382	2.04354	3.05486	2.30472	1.88621	2.48369	2.62736	1.54325	1.08798	1.29279	1.48111	1.6085	1.56762	1.40946	1.7955	3.18736	0.627355	0.828799	1.38336	3.35352	0	1.57254	1.32947	1.26985	1.82418	1.95097	2.12023	0.871148	2.55797	1.06317	2.61788	2.22505	2.26409	1.67976	2.36459	1.49673	1.9922	1.36493	1.10563	1.65002	1.96385	2.31301	1.00076	0.656229	1.37083	2.4113	2.3446
hsa-mir-3935	0	0	0	0	0	0	0	0	0	0	0	0	0	0	0	0	0	0	0	0	0	0	0	0	0	0	0	0	0	0	0	0	0	0	0	0	0	0	0	0	0	0	0	0	0	0	0	0	0
hsa-mir-3936	0	0.293986	0	0.429697	0.273647	0.237715	0.324485	0.484822	0	0	0	0.367374	0	0	0	0	0	0	0	0	0	0	0.980694	0.578763	0	0	0	0	0	0	0	0	0	0.336305	0	0	0	0	0.232909	0.135506	0	0	0	0	0	0.114074	0.194339	0	0
hsa-mir-3937	0	1.60132	0	0	0	0	0	0.262681	0	0	0	0	0	0	0	0	0	0	0	0	0	0	0	0	0.462865	0	0	0	0	0	0	0	0	0	0	0	0	0	0	0	0	0	0	0	0	0	0	0	0
hsa-mir-3938	0.386867	0	0	0	0	0	0	0	0	0	0	0	0	0	0	0	0	0	0	0	0	0	0	0	0.462865	0	0	0	0	0	0	0	0	0	0	0	0	0	0	0	0	0	0	0	0	0	0	0	0
hsa-mir-3939	0	0	0	0	0	0	0	0	0	0	0	0	0	0	0	0	0	0	0	0	0	1.15673	0	0	0	0	0	0	0	0	0	0	0	0.336305	0	0	0	0	0.232909	0.135506	0	0	0	0	0	0	0	0	0
hsa-mir-3940	0.691626	0.538086	1.57396	2.46215	0.273647	0	0.96518	0	1.44695	2.61008	0.459696	0.367374	0.675559	0	2.09545	0.351701	0	0.856743	0	0.473115	1.38336	2.02637	0	1.31075	1.53176	2.87797	0.885202	0.495159	0.739437	0	0.724074	1.06317	0	1.74961	0.99438	0.486129	1.0921	0.221121	1.71265	0.669814	0.990857	0.341756	0.920387	1.40808	0	0	0.518636	0.517984	2.20142
hsa-mir-3941	1.15718	0.293986	0.730372	1.77764	1.41731	0.620465	0.126884	1.13635	1.72323	0	0.807771	0.367374	1.7608	0.751135	0	0.351701	0	0	0.627355	0	0.851499	0	0	0.990691	0	0	0.885202	0.495159	0.532417	1.80213	0.724074	0	0	1.03568	0.581218	0	0	0.221121	0.766222	0.838204	0.578873	0.849514	0.290608	0	0.263288	0.318275	0.365581	0.720654	0.782292
hsa-mir-3942	0.386867	0.538086	0	0	0.701841	0.620465	0.243505	0.484822	0.655751	0	0	0	0	0	0.726588	0.870418	0	1.39061	0.627355	0	0	1.50806	0.572121	0	0	0	0	0	1.3574	0	0.406994	0	0.59822	0.336305	0	0.263444	0.811106	0	0.433392	0.25937	0.219786	0	0.532378	0.732515	0	0	0.365581	0.282115	0.565507
hsa-mir-3943	0	0.538086	0.525446	0	0	0	0.111221	0.262681	0.655751	0	0	0	0	0	0	0	0	0	0	0	0	0	0	0.578763	0	0	0	0	0	0	0.406994	0	0	0	0	0	0	0	0	0.135506	0	0	0.290608	0.412258	0	0.497126	0	0.517984	0
hsa-mir-3944	1.15718	0	1.06932	0.429697	0.273647	1.05293	0.126884	0.484822	0	0.712084	0.459696	0	0.675559	0	0.726588	0.634248	0	1.39061	0	0.473115	1.38336	1.15673	0	0	0.462865	0	0	0.495159	0	0.500352	0.406994	0	0.59822	0.837988	0	0	0.647008	0	0.609383	0	0.410474	0.341756	0.290608	0.412258	0	0.114074	0.365581	0.282115	0.782292
hsa-mir-3945	0	0	0	0	0	0	0	0	0	0	0	0	0	0	0	0	0	0	0	0	0	0	0	0	0	0	0	0	0	0	0	0	0	0	0	0	0.249311	0	0.232909	0	0	0	0	0	0	0	0	0	0
hsa-mir-3960	0	0.293986	0	0	0	0	0	0	0	0	0	0	0	0	0	0	0	0	0	0	0	0	0	0	0	0	0	0	0	0	0	0	0	0	0	0	0	0	0	0	0	0	0	0	0	0	0	0	0
hsa-mir-3972	0	0	0	0	0	0	0	0	0	0	0	0	0	0	0	0	0	0	0	0	0	0	0	0	0	0	0	0	0	0	0	0	0	0	0	0	0	0	0	0	0	0	0	0	0	0	0	0	0
hsa-mir-3973	0	0	0	0	0	0	0	0	0	0	0	0	0	0	0	0	0	0	0	0	0	0	0	0	0	0	0	0	0	0	0	0	0	0	0	0	0	0	0	0	0	0	0	0	0	0	0	0	0
hsa-mir-3974	0	0	0	0	0	0	0	0	0	0	0	0	0	0	0	0	0	0	0	0	0	0	0	0	0	0	0	0	0	0	0	0	0	0	0	0	0	0	0	0	0	0	0	0	0	0	0	0	0
hsa-mir-3975	0	0	0	0	0	0	0	0	0	0	0	0	0	0	0	0	0	0	0	0	0	0	0	0	0	0	0	0	0	0	0	0	0	0	0	0	0	0	0	0	0	0	0	0	0	0	0	0	0
hsa-mir-3976	0	0	0	0	0	0	0	0	0	0	0	0	0	0	0	0	0	0	0	0	0	0	0	0	0	0	0	0	0	0	0	0	0	0	0	0	0	0	0	0	0	0	0	0	0	0	0	0	0
hsa-mir-3977	0	0	0	0	0	0	0	0	0	0	0	0	0	0	0	0	0	0	0	0	0	0	0	0	0	0	0	0	0	0	0	0	0	0	0	0	0	0	0	0	0	0	0	0	0	0	0	0	0
hsa-mir-3978	0	0	0	0	0	0	0	0	0	0	0	0	0	0	0	0	0	0	0	0	0	0	0	0	0	0	0	0	0	0	0	0	0	0	0	0	0	0	0	0	0	0	0	0	0	0	0	0	0
hsa-mir-409	5.35691	5.90125	7.1679	5.67132	5.59727	4.86406	3.95675	5.97061	6.24425	5.22403	6.35851	4.89289	5.33686	6.23763	5.52906	5.40632	5.60821	6.33043	4.84706	5.68519	4.65141	5.86227	4.69053	4.93612	6.04578	5.15294	6.99103	5.22664	5.24122	5.17941	5.24142	5.97963	4.46387	5.83077	6.54855	5.42866	4.28441	3.74662	5.65555	5.88273	5.76771	4.95128	6.69249	5.01894	4.62205	4.95186	4.35523	5.34069	6.60676
hsa-mir-410	4.13814	5.24191	4.2153	2.16012	4.02208	2.89694	2.78265	3.23077	3.26777	3.11404	5.00656	3.98095	2.8016	4.33108	1.85554	3.41444	3.78332	4.35492	2.80571	4.79593	1.77109	3.16862	3.2132	2.44417	3.43765	2.57041	3.86318	3.13423	2.98521	3.08101	3.29276	2.80578	2.20067	2.30386	4.91985	3.94716	1.78756	3.13504	3.36257	3.7237	3.99775	2.94157	4.03543	2.49332	4.5499	3.85737	3.41432	3.02276	3.40574
hsa-mir-411	4.18768	4.16605	4.75078	3.1667	3.31918	2.71212	2.20957	3.6534	3.35148	2.88395	3.47662	2.99278	2.67241	4.00257	2.3011	2.50921	2.84367	3.52886	1.89672	3.7039	2.07639	1.79037	3.2132	3.15333	3.27804	2.73237	4.52498	3.06533	2.76607	2.10985	2.29603	2.68877	2.35354	3.10652	4.6234	4.0727	2.6512	3.16199	3.56834	3.33055	3.01366	3.17296	4.4579	3.95919	5.19525	3.25657	3.37476	2.46872	4.558
hsa-mir-412	3.35425	0	4.23226	0.760351	4.77169	1.05293	1.28425	2.3768	1.72323	0	3.93164	1.73119	0.675559	4.00257	3.24965	0.870418	2.75842	3.3104	1.06313	3.94109	2.32823	3.16862	0.980694	0.578763	3.86967	2.73237	1.82418	2.46054	0.739437	0.500352	2.47583	2.09375	2.20067	0	1.99156	1.13884	1.86431	2.79971	0.766222	3.34461	1.21194	0	1.78857	1.57754	2.48668	1.31094	0.657	0.282115	1.54579
hsa-mir-421	2.3214	2.68359	2.02703	1.62373	1.17195	1.81054	1.63128	1.84647	1.10492	0.712084	1.52419	0.903046	1.48111	2.53152	2.48105	1.25116	1.16072	2.33763	1.06313	1.73492	1.38336	3.59283	0	2.79136	3.22065	2.17901	3.2434	1.78946	2.32687	1.61955	3.03038	0	2.35354	1.95892	2.36016	0.84909	2.31075	1.2173	1.71265	1.47124	0.729655	0.617859	1.87887	1.57754	2.13868	1.04938	0.365581	1.92892	3.30426
hsa-mir-422a	0	0	0	0	0	0	0	0	0	0	0	0	0	0	0	0	0	0	0	0	0	0	0	0	0	0	0	0	0	0	0	0	0	0	0	0	0	0	0	0	0	0	0	0	0	0	0	0	0
hsa-mir-423	8.55068	6.36797	7.98665	8.6809	7.02088	7.21004	7.03481	7.14357	7.06529	6.91094	6.13024	5.29574	6.48201	6.53197	7.2687	5.84089	6.43753	7.23864	7.56588	6.14687	6.5219	7.32393	5.00671	6.81438	7.07585	7.35145	7.52322	6.56011	5.91563	6.46037	7.73809	6.35094	7.60906	8.32293	7.41367	6.83785	8.08285	6.26731	7.616	6.36184	6.85012	7.23797	7.37039	7.76369	6.82679	5.96303	6.57887	7.52979	7.89817
hsa-mir-424	7.23038	6.37976	7.42373	8.38252	5.09629	5.68686	5.362	6.44085	7.11405	7.04944	4.98962	4.89289	7.1792	7.34177	8.46984	6.09507	6.70578	8.16215	6.80896	5.82015	6.64296	7.91143	5.28404	7.37375	7.46678	8.04174	8.7722	8.09435	5.36357	6.17601	6.86265	7.07111	8.78584	7.8646	8.37104	5.76263	7.4568	5.91008	8.01722	6.31622	6.98368	7.16191	8.26708	8.02781	5.22645	5.67781	5.26107	7.21234	9.10898
hsa-mir-425	10.3901	8.94758	7.783	7.72756	8.19777	8.51944	7.34245	8.0379	7.07763	8.42767	8.0094	6.97052	8.63065	9.75793	7.99082	5.54926	8.28531	8.67562	8.97667	8.23364	8.61444	9.05569	7.24215	10.1668	8.98622	9.43729	8.3536	10.0408	7.38407	8.60833	7.86856	7.77057	8.72056	8.12958	10.2061	8.54548	8.23602	8.36686	7.93181	5.96691	6.3365	7.90346	7.48983	9.26033	5.74566	5.74353	8.05706	8.50802	8.22873
hsa-mir-4251	0	0	0	0	0	0	0	0	0	0	0	0	0	0	0	0	0	0	0	0	0	0	0	0	0	0	0	0	0	0	0	0	0	0	0	0	0	0	0	0	0	0	0	0	0	0	0	0	0
hsa-mir-4252	0	0	0	0	0	0	0	0	0	0	0	0	0	0	0	0	0	0	0	0	0	0	0	0	0	0	0	0	0	0	0	0	0	0	0	0	0	0	0	0	0	0	0	0	0	0	0	0	0
hsa-mir-4253	0	0	0	0	0	0	0	0	0	0	0	0	0	0	0	0	0	0	0	0	0	0	0	0	0	0	0	0	0	0	0	0	0	0	0	0	0	0	0	0	0	0	0	0	0	0	0	0	0
hsa-mir-4254	0	0	0	0	0	0	0	0	0	0	0	0	0	0.751135	0	0	0	0	0	0	0	0	0	0	0	0	0	0	0	0	0	0	0	0	0	0	0	0	0	0	0	0	0	0	0	0	0	0	0
hsa-mir-4255	0	0	0	0	0	0	0	0	0	0	0	0	0	0	0	0	0	0	0	0	0	0	0	0	0	0	0	0	0	0	0	0	0	0	0	0	0	0	0	0	0	0	0	0	0	0	0	0	0
hsa-mir-4256	0	0	0	0	0	0	0	0	0	0	0	0	0	0	0	0	0	0	0	0	0	0	0	0	0	0	0	0	0	0	0	0	0	0	0	0	0	0	0	0	0	0	0	0	0	0	0	0	0
hsa-mir-4257	0	0	0	0	0	0	0	0	0	0	0	0	0	0	0	0	0	0	0	0	0	0	0	0	0	0	0	0	0	0	0	0	0	0	0	0	0	0	0	0	0	0	0	0	0	0	0	0	0
hsa-mir-4258	0	0	0	0	0	0	0	0	0	0	0	0	0	0	0	0	0	0	0	0	0	0	0	0	0	0	0	0	0	0	0	0	0	0	0	0	0	0	0	0	0	0	0	0	0	0	0	0	0
hsa-mir-4259	0	0	0	0	0	0	0	0	0	0	0	0	0	0	0	0	0	0	0	0	0	0	0	0	0	0	0	0	0	0	0	0	0	0	0	0	0	0	0	0	0	0	0	0	0	0	0	0	0
hsa-mir-4260	0	0	0	0	0.273647	0	0	0	0	0	0	0	0	0	0	0	0	0	0	0	0	0	0	0	0	0	0	0	0	0	0	0	0	0	0	0	0	0	0	0	0	0.341756	0	0	0	0	0	0	0
hsa-mir-4261	0	0	0	0	0	0	0	0	0	0	0	0	0	0	0	0	0	0	0	0	0	0	0	0	0	0	0	0	0	0	0	0	0	0	0	0	0	0	0	0	0	0	0	0	0	0	0	0	0
hsa-mir-4262	0	0	0	0	0	0	0	0	0	0	0	0	0	0	0	0	0	0	0	0	0	0	0	0	0	0	0	0	0	0	0	0	0	0	0	0	0	0	0	0	0	0	0	0	0	0	0	0	0
hsa-mir-4263	0	0	0	0	0	0	0	0	0	0	0	0	0	0	0	0	0	0	0	0	0	0	0	0	0	0	0	0	0	0	0	0	0	0	0	0	0	0	0	0	0	0	0	0	0	0	0	0	0.310287
hsa-mir-4264	0	0	0	0	0	0	0	0	0	0	0	0	0	0	0	0	0	0	0	0	0	0	0	0	0	0	0	0	0	0	0	0	0	0	0	0	0	0	0	0	0	0	0	0	0	0	0	0	0
hsa-mir-4265	0	0	0	0	0	0	0	0	0	0	0	0	0	0	0	0	0	0	0	0	0	0	0	0	0	0	0	0	0	0	0	0	0	0	0	0	0	0	0	0	0	0	0	0	0	0	0	0	0
hsa-mir-4266	0	0	0	0	0	0	0	0	0	0	0	0	0	0	0	0	0	0	0	0	0	0	0	0	0	0	0	0	0	0	0	0	0	0	0	0	0	0	0	0	0	0	0	0	0	0	0	0	0
hsa-mir-4267	0	0	0	0	0	0	0	0	0	0	0	0	0	0	0	0	0	0	0	0	0	0	0	0	0	0	0	0	0	0	0	0	0	0	0	0	0	0	0	0	0	0	0	0	0	0	0	0	0
hsa-mir-4268	0	0	0	0	0	0	0	0	0	0	0	0	0	0	0	0	0	0	0	0	0	0	0	0	0	0	0	0	0	0	0	0	0	0	0	0	0	0	0	0	0	0	0	0	0	0	0	0	0
hsa-mir-4269	0	0	0	0	0	0	0	0	0	0	0	0	0	0	0	0	0	0	0	0	0	0	0	0	0	0	0	0	0	0	0	0	0	0	0	0	0	0	0	0	0	0	0	0	0	0	0	0	0
hsa-mir-4270	0	0	0	0	0	0	0	0	0	0	0	0	0	0	0	0	0	0	0	0	0	0	0	0	0	0	0	0	0	0	0	0	0	0	0	0	0	0	0	0	0	0	0	0	0	0	0	0	0
hsa-mir-4271	0	0	0	0	0	0	0	0	0	0	0	0	0	0	0	0	0	0	0	0	0	0	0	0	0	0	0	0	0	0	0	0	0	0	0	0	0	0	0	0	0	0	0	0	0	0	0	0	0
hsa-mir-4272	0	0	0	0	0	0	0	0	0	0	0	0	0	0	0	0	0	0	0	0	0	0	0	0	0	0	0	0	0	0	0	0	0	0	0	0	0	0	0	0	0	0	0	0	0	0	0	0	0
hsa-mir-4273	0	0	0	0	0	0	0	0	0	0	0	0	0	0	0	0	0	0	0	0	0	0	0	0	0	0	0	0	0	0	0	0	0	0	0	0	0	0	0	0	0	0	0	0	0	0	0	0	0
hsa-mir-4274	0	0	0	0	0	0	0	0	0	0	0	0	0	0	0	0	0	0	0	0	0	0	0	0	0	0	0	0	0	0	0	0	0	0	0	0	0	0	0	0	0	0	0	0	0	0	0	0	0
hsa-mir-4275	0	0	0	0	0	0	0	0	0	0	0	0	0	0	0	0	0	0	0	0	0	0	0	0	0	0	0	0	0	0	0	0	0	0	0	0	0	0	0	0	0	0	0	0	0	0	0	0	0
hsa-mir-4276	0	0	0	0	0	0	0	0	0	0	0	0	0	0	0	0	0	0	0	0	0	0	0	0	0	0	0	0	0	0	0	0	0	0	0	0	0	0	0	0	0	0	0	0	0	0	0	0	0
hsa-mir-4277	0	0	0	0	0	0	0	0	0	0	0	0	0	0	0	0	0	0	0	0	0	0	0	0	0	0	0	0	0	0	0	0	0	0	0	0	0	0	0	0	0	0	0	0	0	0	0	0	0
hsa-mir-4278	0	0	0	0	0	0	0	0	0	0	0	0	0	0	0	0	0	0	0	0	0	0	0	0	0	0	0	0	0	0	0	0	0	0	0	0	0	0	0	0	0	0	0	0	0	0	0	0	0
hsa-mir-4279	0	0	0	0	0	0	0	0	0	0	0	0	0	0	0	0	0	0	0	0	0	0	0	0	0	0	0	0	0	0	0	0	0	0	0	0	0	0	0	0	0	0	0	0	0	0	0	0	0
hsa-mir-4280	0	0	0	0	0	0	0	0	0	0	0	0	0	0	0	0	0	0	0	0	0	0	0	0	0	0	0	0	0	0	0	0	0	0	0	0	0	0	0	0	0	0	0	0	0	0	0	0	0
hsa-mir-4281	0	0	0	0	0	0	0	0	0	0	0	0	0	0	0	0	0	0	0	0	0	0	0	0	0	0	0	0	0	0	0	0	0	0	0	0	0	0	0	0	0	0	0	0	0	0	0	0	0
hsa-mir-4282	0	0	0	0	0	0	0	0	0	0	0	0	0	0	0	0	0	0	0	0	0	0	0	0	0	0	0	0	0	0	0	0	0	0	0	0	0	0	0	0	0	0	0	0	0	0	0	0	0
hsa-mir-4283-1	0	0	0	0	0	0	0	0	0	0	0	0	0	0	0	0	0	0	0	0	0	0	0	0	0	0	0	0	0	0	0	0	0	0	0	0	0	0	0	0	0	0	0	0	0	0	0	0	0
hsa-mir-4283-2	0	0	0	0	0	0	0	0	0	0	0	0	0	0	0	0	0	0	0	0	0	0	0	0	0	0	0	0	0	0	0	0	0	0	0	0	0	0	0	0	0	0	0	0	0	0	0	0	0
hsa-mir-4284	0	0	0	0.429697	0	0	0	0	0	0	0	0	0	0	0	0	0	0	0	0	0	0	0	0	0	0	0	0	0	0	0	0	0	0	0	0	0	0	0	0	0	0	0	0	0	0	0	0	0
hsa-mir-4285	0	0	0	0	0	0	0	0	0	0	0	0	0	0	0	0	0	0	0	0	0	0	0	0	0	0	0	0	0	0	0	0	0	0	0	0	0	0	0	0	0	0	0	0	0	0	0	0	0
hsa-mir-4286	0	0	0	0	0	0.237715	0.126884	0	0	0	0	0	0.675559	0	0	0	0	0	0.627355	0	0	0	0	0	0	0	0	0.495159	0	0	0.406994	0	0.59822	0	0	0	0	0	0	0	0	0	0.290608	0.732515	0	0	0	0	0
hsa-mir-4287	0	0	0	0	0	0	0	0	0	0	0	0	0	0	0	0	0	0	0	0	0	0	0	0	0	0	0	0	0	0	0	0	0	0	0	0	0	0	0	0	0	0	0	0	0	0	0	0	0
hsa-mir-4288	0	0	0	0	0	0	0	0	0	0	0	0	0	0	0	0	0	0	0	0	0	0	0	0	0	0	0	0	0	0	0	0	0	0	0	0	0	0	0	0	0	0	0	0	0	0	0	0	0
hsa-mir-4289	0	0	0	0	0	0	0	0	0	0	0	0	0	0	0	0	0	0	0	0	0	0	0	0	0	0	0	0	0	0	0	0	0	0	0	0	0	0	0	0	0	0	0	0	0	0	0	0	0
hsa-mir-429	10.0754	8.24516	8.80686	8.49917	8.58515	8.05	6.4576	7.7621	8.42126	8.38699	6.43559	6.68357	7.16726	7.45281	8.18508	5.85472	6.38161	9.44122	8.01186	6.76161	9.00164	10.3913	3.48811	8.84555	9.6647	9.86933	9.37183	9.01156	6.84602	6.86619	7.27154	6.30197	9.57366	10.5815	9.26022	8.21482	7.45059	7.11353	8.48124	6.13604	6.936	8.57098	9.25	10.5036	5.56221	4.26182	7.85803	7.3235	9.4212
hsa-mir-4290	0	0	0	0	0	0	0	0	0	0	0	0	0	0	0	0	0	0	0	0	0	0	0	0	0	0	0	0	0	0	0	0	0	0	0	0	0	0	0	0	0	0	0	0	0	0	0	0	0
hsa-mir-4291	0	0	0	0	0	0	0	0	0	0	0	0	0	0	0	0	0	0	0	0	0	0	0	0	0	0	0	0	0	0	0	0	0	0	0	0	0	0	0	0	0	0	0	0	0	0	0	0	0
hsa-mir-4292	0	0	0	0	0	0	0	0	0	0	0	0	0	0	0	0	0	0	0	0	0	0	0	0	0	0	0	0	0	0	0	0	0	0	0	0	0	0	0	0	0	0	0	0	0	0	0	0	0
hsa-mir-4293	0	0	0	0	0	0	0	0	0	0	0	0	0	0	0	0	0	0	0	0	0	0	0	0	0	0	0	0	0	0	0	0	0	0	0	0	0	0	0	0	0	0	0	0	0	0	0	0	0
hsa-mir-4294	0	0	0	0	0	0	0	0	0	0	0	0	0	0	0	0	0	0	0	0	0	0	0	0	0	0	0	0	0	0	0	0	0	0	0	0	0	0	0	0	0	0	0	0	0	0	0	0	0
hsa-mir-4295	0	0	0	0	0	0	0	0	0	0	0	0	0	0	0	0	0	0	0	0	0	0	0	0	0	0	0	0	0	0	0	0	0	0	0	0	0	0	0	0	0	0	0	0	0	0	0	0	0
hsa-mir-4296	0	0	0	0	0	0	0	0	0	0	0	0	0	0	0	0	0	0	0	0	0	0	0	0	0	0	0	0	0	0	0	0	0	0	0	0	0	0	0	0	0	0	0	0	0	0	0	0	0
hsa-mir-4297	0	0	0	0	0	0	0	0	0	0	0	0	0	0	0	0	0	0	0	0	0	0	0	0	0	0	0	0	0	0	0	0	0	0	0	0	0	0	0	0	0	0	0	0	0	0	0	0	0
hsa-mir-4298	0	0	0	0	0	0	0	0	0	0	0	0	0	0	0	0	0	0	0	0	0	0	0	0	0	0	0	0	0	0	0	0	0	0	0	0	0	0	0	0	0	0	0	0	0	0	0	0	0
hsa-mir-4299	0	0	0	0	0	0	0	0	0	0	0	0	0	0	0	0	0	0	0	0	0	0	0	0	0	0	0	0	0	0	0	0	0	0	0	0	0	0	0	0	0	0	0	0	0	0	0	0	0
hsa-mir-4300	0	0	0	0	0	0	0	0	0	0	0	0	0	0	0	0	0	0	0	0	0	0	0	0	0	0	0	0	0	0	0	0	0	0	0	0	0	0	0	0	0	0	0	0	0	0	0	0	0
hsa-mir-4301	0	0	0	0	0	0	0	0	0	0	0	0	0	0	0	0	0	0	0	0	0	0	0	0	0	0	0	0	0	0	0	0	0	0	0	0	0	0	0	0	0	0	0	0	0	0	0	0	0
hsa-mir-4302	0	0	0	0	0	0	0	0	0	0	0	0	0	0	0	0	0	0	0	0	0	0	0	0	0	0	0	0	0	0	0	0	0	0	0	0	0	0	0	0	0	0	0	0	0	0	0	0	0
hsa-mir-4303	0	0	0	0	0	0	0	0	0	0	0	0	0	0	0	0	0	0	0	0	0	0	0	0	0	0	0	0	0	0	0	0	0	0	0	0	0	0	0	0	0	0	0	0	0	0	0	0	0
hsa-mir-4304	0	0	0	0	0	0	0	0	0	0	0	0	0	0	0	0	0	0	0	0	0	0	0	0	0	0	0	0	0	0	0	0	0	0	0	0	0	0	0	0	0	0	0	0	0	0	0	0	0
hsa-mir-4305	0	0	0	0	0	0	0	0	0	0	0	0	0	0	0	0	0	0	0	0	0	0	0	0	0	0	0	0	0	0	0	0	0	0	0	0	0	0	0	0	0	0	0	0	0	0	0	0	0
hsa-mir-4306	0.386867	0.293986	0	0	0	0	0	0	0	0.712084	0	0	0	0	0	0	0	0	0.627355	0.473115	0	0	0	0	0	0	0	0	0.532417	0	0	0	0	0	0.41223	0	0	0	0.433392	0	0	0.341756	0	0	0	0	0	0	0
hsa-mir-4307	0	0	0	0	0	0	0	0	0	0	0	0	0	0	0	0	0	0	0	0	0	0	0	0	0	0	0	0	0	0	0	0	0	0	0	0	0	0	0	0	0	0	0	0	0	0	0	0	0
hsa-mir-4308	0	0	0	0	0	0	0	0	0	0	0	0	0	0	0	0	0	0	0	0	0	0	0	0	0	0	0	0	0	0	0	0	0	0	0	0	0	0	0	0	0	0	0	0	0	0	0	0	0
hsa-mir-4309	0	0	0	0	0	0	0	0	0	0	0	0	0	0	0	0	0	0	0	0	0	0	0	0	0	0	0	0	0	0	0	0	0	0	0	0	0	0	0	0	0	0	0	0	0	0.114074	0	0	0
hsa-mir-431	3.79879	3.51059	4.53534	3.05067	4.29194	2.99744	2.01042	4.72043	3.83137	3.21664	5.0884	3.36178	3.13155	4.47097	3.14676	3.74662	3.86716	3.42376	2.80571	4.17605	2.32823	3.59283	2.4277	3.30513	3.86967	3.3468	4.5771	3.68648	1.87896	2.85168	3.24396	3.86978	2.49176	2.76031	4.83043	3.58721	2.36459	2.69289	3.36257	3.99717	4.35178	3.0848	4.31963	1.86637	3.70185	3.2812	3.35456	2.86063	3.61798
hsa-mir-4310	0	0	0	0	0	0	0	0	0	0	0	0	0	0	0	0	0	0	0	0	0	0	0	0	0	0	0	0	0	0	0	0	0	0	0	0	0	0	0	0	0	0	0	0	0	0	0	0	0
hsa-mir-4311	0	0	0	0	0	0	0	0	0	0	0	0	0	0	0	0	0	0	0	0	0	0	0	0	0	0	0	0	0	0	0	0	0	0	0	0	0	0	0	0	0	0	0	0	0	0	0	0	0
hsa-mir-4312	0	0	0	0	0	0	0	0	0	0	0	0	0	0	0	0	0	0	0	0	0	0	0	0	0	0	0	0	0	0	0	0	0	0	0	0	0	0	0	0	0	0	0	0	0	0	0	0	0
hsa-mir-4313	0	0	0	0	0	0	0	0	0	0	0	0	0	0	0	0	0	0	0	0	0	0	0	0	0	0	0	0	0	0	0	0	0	0	0	0	0	0	0	0	0	0	0	0	0	0	0	0	0
hsa-mir-4314	0	0	0	0	0	0	0	0	0	0	0	0	0	0	0	0	0	0	0	0	0	0	0	0	0	0	0	0	0	0	0	0	0	0	0	0	0	0	0	0	0	0	0	0	0	0	0	0	0
hsa-mir-4315-1	0	0.293986	0	0.429697	0	0	0	0	0	0	0	0	0	0	0.726588	0	0	0	0	0	0	0	0	0	0	0	0	0	0	0	0	0	0	0	0	0	0	0	0	0	0	0	0	0	0	0	0	0	0
hsa-mir-4315-2	0	0	0	0	0	0	0	0	0	0	0	0	0	0	0	0	0	0	0	0	0	0	0	0	0	0	0	0	0	0	0	0	0	0	0	0	0	0	0	0	0	0	0	0	0	0	0	0	0
hsa-mir-4316	0	0	0	0	0	0	0	0	0	0	0	0	0	0	0	0	0	0	0	0	0	0	0	0	0	0	0	0	0	0	0	0	0	0	0	0	0	0	0	0	0	0	0	0	0	0	0	0	0
hsa-mir-4317	0	0	0	0	0	0	0	0	0	0	0	0	0	0	0	0	0	0	0	0	0	0	0	0	0	0	0	0	0	0	0	0	0	0	0	0	0	0	0	0	0	0	0	0	0	0	0	0	0
hsa-mir-4318	0	0	0	0	0	0	0	0	0	0	0	0	0	0	0	0	0	0	0	0	0	0	0	0	0	0	0	0	0	0	0	0	0	0	0	0	0	0	0	0	0	0	0	0	0	0	0	0	0
hsa-mir-4319	0	0	0	0	0	0	0	0	0	0	0	0	0	0	0	0	0	0	0	0	0	0	0	0	0	0	0	0	0	0	0	0	0	0	0	0	0	0	0	0	0	0	0	0	0	0	0	0	0
hsa-mir-432	2.9572	3.79528	4.47961	2.16012	3.80212	3.06075	2.89253	3.32002	3.35148	1.54325	4.09895	2.06696	2.37309	3.30458	0.726588	3.03169	2.92416	3.42376	1.89672	3.1938	2.32823	2.22914	1.55916	2.15542	3.03338	1.93461	3.86318	2.56406	1.22592	2.36334	2.70943	2.68877	1.34571	2.44965	4.13234	3.03778	1.86431	2.31479	2.83432	3.06796	3.35267	2.60375	3.40541	2.31301	2.67936	2.80868	3.37476	1.7552	3.46963
hsa-mir-4320	0	0	0	0	0	0	0	0	0	0	0	0	0	0	0	0	0	0	0	0	0	0	0	0	0	0	0	0	0	0	0	0	0	0	0	0	0	0	0	0	0	0	0	0	0	0	0	0	0
hsa-mir-4321	0	0	0	0	0	0	0	0	0	0	0	0	0	0	0	0	0	0	0	0	0	0	0	0	0	0	0	0	0	0	0	0	0	0	0	0	0	0	0	0	0	0	0	0	0	0	0	0	0
hsa-mir-4322	0	0	0	0.429697	0	0	0	0	0	0	0	0	0	0	0	0	0	0	0	0	0	0	0	0	0	0	0	0	0	0	0	0	0	0	0	0	0	0	0	0	0	0	0	0	0	0	0	0	0
hsa-mir-4323	0	0	0	0	0	0	0	0	0	0	0	0	0	0	0	0	0	0	0	0	0	0	0	0	0	0	0	0	0	0	0	0	0	0	0	0	0	0	0	0	0	0	0	0	0	0	0	0	0
hsa-mir-4324	0	0	0	0	0	0	0	0	0	0	0	0	0	0	0	0	0	0	0	0	0	0	0	0	0	0	0	0	0	0	0	0	0	0	0	0	0	0	0	0	0	0	0	0	0	0	0	0	0
hsa-mir-4325	0	0	0	0	0	0	0	0	0	0	0	0	0	0	0	0	0	0	0	0	0	0	0	0	0	0	0	0	0	0	0	0	0	0	0	0	0	0	0	0	0	0	0	0	0	0	0	0	0
hsa-mir-4326	5.0166	2.78169	4.31421	3.32492	4.04051	4.8817	3.40708	4.18386	0	2.4508	2.13003	1.96349	3.69424	4.06278	2.78502	2.50921	2.4675	3.42376	0.627355	1.35186	0	1.79037	1.97094	1.79404	2.00942	3.3468	2.60458	3.13423	1.78865	1.80213	2.55797	1.39741	1.83562	0	0	0.263444	0	0	2.64526	1.79158	2.40015	1.76794	3.1753	2.65358	1.8491	1.79427	2.66344	3.0606	4.57262
hsa-mir-4327	0	0	0	0	0	0	0	0	0	0	0	0	0	0	0	0	0	0	0	0	0	0	0	0	0	0	0	0	0	0	0	0	0	0	0	0	0	0	0	0	0	0	0	0	0	0	0	0	0
hsa-mir-4328	0	0	0	0	0	0	0	0	0	0	0	0	0.675559	0	0	0	0	0	0	0	0	0	0	0	0	0	0	0	0	0	0	0	0	0	0	0	0	0	0	0	0	0	0	0	0	0	0	0	0
hsa-mir-4329	0	0	0	0	0	0	0	0	0	0	0	0	0	0	0	0	0	0	0	0	0	0	0	0	0	0	0	0	0	0	0	0	0	0	0	0	0	0	0	0	0	0	0	0	0	0	0	0	0
hsa-mir-433	1.50858	2.13433	2.17473	1.02917	1.03161	1.1724	0.611659	1.2618	1.95501	1.18672	1.70111	1.11104	1.48111	1.90013	0	2.64275	0.86694	1.39061	0.627355	1.35186	1.38336	0.691319	0.572121	1.98601	1.70914	0.770352	2.79268	0.495159	0.290631	1.41047	0.724074	0	0.59822	0.837988	2.31293	0.84909	0.46182	0.221121	1.36559	1.36493	2.72139	1.22434	2.50748	0.994435	1.26392	1.72414	1.66129	1.7552	1.13735
hsa-mir-4330	0	0	0	0	0	0	0	0	0	0	0	0	0	0	0	0	0	0	0	0	0	0	0	0	0	0	0	0	0	0	0	0	0	0	0	0	0	0	0	0	0	0	0	0	0	0	0	0	0
hsa-mir-4417	0	0	0	0.429697	0	0	0	0	0	0	0	0	0	0	0	0	0.497633	0	0	0	0	0	0	0	0	0	0	0	0	0	0	0	0	0	0	0	0	0	0	0	0	0	0	0	0	0	0	0	0
hsa-mir-4418	0	0	0	0	0	0	0	0	0	0	0	0	0	0	0	0	0	0	0	0	0	0	0	0	0	0	0	0	0	0	0	0	0	0	0	0	0	0	0	0	0	0	0	0	0	0	0	0	0
hsa-mir-4419a	0	0	0	0	0	0	0	0	0	0	0	0	0	0	0	0	0	0	0	0	0	0	0	0	0	0	0	0	0	0	0	0	0	0	0	0	0	0	0	0	0	0	0	0	0	0	0	0	0
hsa-mir-4419b	0.386867	0	0	0	0	0	0.126884	0	0	0	0	0	0	0	0	0	0	0	0	0	0	0	0	0	0	0	0	0.495159	0	0	0	0	0	0	0	0.486129	0	0	0.232909	0	0	0	0	0	0	0.114074	0	0	0
hsa-mir-4420	0	0	0	0	0	0	0	0	0	0	0	0	0	0	0	0	0.497633	0	0	0	0	0	0	0	0	0	0	0	0	0	0	0	0	0	0	0	0	0	0.232909	0	0	0	0	0	0	0	0	0	0
hsa-mir-4421	0	0	0	0	0	0	0	0	0	0	0	0	0	0	0	0	0	0	0	0	0	0	0	0	0	0	0	0	0	0	0	0	0	0	0.220789	0	0	0	0	0	0	0	0	0	0	0	0	0	0
hsa-mir-4422	0	0	0	0	0	0	0	0	0	0	0	0	0	0	0	0	0	0	0	0	0	0	0	0	0	0	0	0	0	0	0	0	0	0	0.220789	0	0	0	0.232909	0	0	0	0	0	0	0	0	0	0
hsa-mir-4423	0.691626	0	0.525446	0.429697	0.503572	0	0.111221	0	0	0	0	0	0.675559	0	1.85554	0	0	0	0	0	0	0.691319	0	0	0.812745	0.770352	0	0.495159	0.532417	0.500352	0	0	0	0.608844	0.99438	0.263444	0	0.221121	0.433392	0.135506	0.219786	0.341756	0.290608	0.412258	0	0	0.365581	0.282115	0.310287
hsa-mir-4424	0	0	0	0	0.876125	0.237715	0.126884	0	0	0	0	0.367374	0	1.24259	0	0.351701	0	0	0	0	0	0	0	0	0	0	0	0	0	0.500352	0	0	0	0	0.581218	0.263444	0	0.733401	0	0	0	0.341756	0	0	0	0.114074	0.657	0.720654	0
hsa-mir-4425	0	0	0	0	0	0	0.111221	0	0	0	0	0	0	0	0	0	0	0	0	0	0	0	0	0	0.462865	0	0	0	0	0	0	0	0	0	0	0	0	0	0	0	0	0	0.290608	0	0	0	0	0	0.310287
hsa-mir-4426	0	0	0	0	0	0	0	0	0	0	0	0	0	0	0	0	0	0	0	0.473115	0	0	0	0	0	0	0	0.495159	0.290631	0	0	0	0	0	0	0	0	0	0	0	0	0	0	0	0	0	0	0.282115	0
hsa-mir-4427	0	0	0	0	0	0	0	0	0	0	0	0	0	0	0	0	0	0	0	0	0	0	0	0	0	0	0	0	0	0	0	0	0	0	0	0	0	0	0	0	0	0	0	0	0	0	0	0	0.310287
hsa-mir-4428	0	0	0	0	0	0	0	0	0	0	0	0	0	0	0	0	0	0	0	0	0	0	0	0	0	0	0	0	0	0	0	0	0	0	0	0	0	0	0	0	0	0	0	0	0	0	0	0	0
hsa-mir-4429	0	0	0	0	0.273647	0	0	0	0	0	0	0	0	0	0	0	0	0	0	0	0	0.691319	0	1.79404	0.462865	0.770352	0	0.495159	0.532417	0	0.724074	0	0.59822	0	0	0	0	0	0	0	0	0	0	0	0	0	0	0	0
hsa-mir-4430	0	0	0	0	0	0	0	0	0	0	0	0	0	0	0	0	0	0	0	0	0.851499	0	0	0	0	0	0	0	0	0	0	0	0	0	0	0.263444	0	0	0.232909	0	0	0	0.290608	0	0	0	0	0	0.565507
hsa-mir-4431	0	0	0	0	0	0.237715	0	0.677277	0	0	0	0	0	0	0	0	0	0	0	0	0	0	0	0	0	0	0	0	0.290631	0	0	0	0	0.608844	0	0	0.249311	0.581993	0	0	0	0	0	0	0	0	0	0	0
hsa-mir-4432	0	0	0	0	0	0	0	0	0	0	0	0	0	0	0	0	0	0	0	0	0	0	0	0	0	0	0	0	0	0	0	0	0	0	0	0	0	0	0	0	0	0	0	0	0	0	0	0	0
hsa-mir-4433a	0	0	0.525446	0	0	0	0.111221	0	0	0	0	0	0	0	0	0	0	0	0	0	0	0	0	0	0	0	0	0	0	0	0	0	0	0	0	0	0.46182	0.221121	0	0	0	0	0.290608	0	0	0	0	0.282115	0
hsa-mir-4433b	0	0	0.730372	0	0.273647	0	0	0	0	0	0	0	0	0	0	0	0	0	0.627355	0	0	0	0	0	0	0	0	0	0	0	0	0	0.59822	0	0	0.263444	0	0	0	0	0	0.341756	0	0.412258	0	0	0	0	0
hsa-mir-4434	0	0	0.286513	0	0.273647	0	0	0.262681	0.655751	0	0	0	0.675559	0	0	0	0.497633	0	0	0.828799	0	0	0	0	0	0.770352	0	0	0	0.871148	1.20394	0	0	0.336305	0.41223	0	0	0.221121	0.766222	0.135506	0	0	0.739388	0	0	0.41047	0	0.517984	0.310287
hsa-mir-4435-1	0	0	0.286513	0	0	0	0.229065	0	0	0	0	0	0	0	0	0	0	0	0	0.473115	0	0	0	0	0	0	0	0	0	0.500352	0	0	0	0	0	0	0.249311	0	0	0.135506	0	0	0.532378	0	0	0	0	0	0
hsa-mir-4435-2	0	0	0	0	0	0	0.243505	0	0	0	0	0	0	0	0	0	0	0	0	0	0	0	0	0	0	0	0	0	0	0.500352	0	0	0	0	0	0	0	0	0	0	0	0	0.290608	0	0.263288	0	0.194339	0	0
hsa-mir-4436a	0	0	0	0	0	0	0	0	0	0	0	0	0	0	0	0	0	0	0	0	0	0	0	0	0	0	0	0	0	0	0	0	0	0	0	0	0	0	0	0	0	0	0	0	0	0	0	0	0
hsa-mir-4436b-1	0	0	0	0	0	0	0	0	0	0	0	0	0	0	0	0	0	0	0	0	0	0	0	0	0	0	0	0	0	0	0.406994	0	0	0	0	0	0.249311	0	0	0	0	0	0	0	0.263288	0	0	0	0.565507
hsa-mir-4436b-2	0	0	0	0	0	0	0.126884	0	0	0	0	0	0	0	0	0	0	0	0	0	0	0	0	0	0	0	0	0	0	0	0	0	0	0	0	0	0	0	0.232909	0	0	0	0	0	0	0	0	0	0.310287
hsa-mir-4437	0	0	0	0	0	0	0	0	0	0	0	0	0	0	0	0.351701	0	0	0	0	0	0	0	0	0	0	0	0	0	0	0	0	0	0	0	0	0	0	0	0	0	0	0	0	0	0	0	0	0
hsa-mir-4438	0	0	0	0	0	0	0	0	0	0	0	0	0	0	0	0	0	0	0	0	0	0	0	0	0	0	0	0	0	0	0	0	0	0	0	0	0	0	0	0	0	0	0	0	0	0	0	0	0
hsa-mir-4439	0	0	0	0	0	0	0	0	0	0	0	0	0	0	0	0	0	0	0	0	0	0	0	0	0	0	0	0	0	0	0	0	0	0	0	0	0	0	0	0	0	0	0	0	0	0	0	0	0
hsa-mir-4440	0	0	0	0	0	0	0	0	0	0	0	0	0	0	0	0	0	0	0	0	0	0	0	0	0	0	0	0	0	0	0	0	0	0	0	0	0	0	0	0	0	0	0	0	0	0	0	0	0
hsa-mir-4441	0	0	0	0	0	0	0	0	0	0	0	0	0	0	0	0	0	0	0	0	0	0	0	0	0	0	0	0	0	0	0	0	0	0	0	0	0	0	0	0	0	0	0	0	0	0	0	0	0
hsa-mir-4442	0	0.293986	1.21296	0.760351	0	0	0	0	0	0	0.459696	0.367374	0	0	1.20754	0.634248	0	0.856743	0	0	0.851499	0.691319	0.980694	0.578763	1.53176	0.770352	0	0.495159	0.532417	0.500352	0.983867	1.06317	1.01984	0.336305	0.732472	0.263444	0.647008	0.221121	0	0.135506	0.219786	0	0	0	0	0	0	0.720654	0.782292
hsa-mir-4443	0.386867	0	0.525446	0	0.503572	0	0	0.484822	0.655751	0	0	0	0	0	0.726588	0.351701	0.497633	0	1.06313	1.11391	0	0	0	0.990691	0.462865	0	0	0	0	1.16586	0.983867	0	0.59822	0.336305	0.220789	0	0.249311	0	0.433392	0.479139	0	0	0.290608	0.412258	0.485863	0	0.783247	0	0.782292
hsa-mir-4444-1	0.691626	0.293986	0.286513	1.62373	0.876125	0.237715	0.3514	0.677277	1.10492	0	0.459696	0.367374	1.48111	0	0.726588	0.634248	0.86694	0.856743	0	0.473115	1.77109	1.15673	0.572121	0	0.462865	0	1.42977	1.60757	0	0	0.406994	1.66859	1.01984	1.50469	0.581218	0.486129	1.93719	0	1.03648	0.373436	0	0.617859	0.290608	0.412258	0	0.114074	0.518636	0	1.42206
hsa-mir-4444-2	0.386867	0.929102	0.286513	2.36833	1.03161	0.922669	0.533935	0.677277	0.655751	0	0	0.659931	0.675559	0.751135	1.20754	0	0.497633	1.39061	1.06313	0.473115	2.32823	0.691319	0.980694	1.31075	1.09412	0	0.885202	0.863107	0.739437	0.500352	0.724074	0.627385	1.01984	1.85806	1.10942	0.486129	1.43176	0.412811	0.766222	0.373436	1.10563	0.849514	0.290608	0.994435	0.263288	0.497126	0.657	0.898329	0.782292
hsa-mir-4445	0	0	0	0	0	0	0	0	0	0	0	0	0	0	0	0	0	0	0	0	0	0	0	0	0	0	0	0	0	0	0	0	0	0	0	0	0	0	0	0	0	0	0	0	0	0	0.194339	0	0
hsa-mir-4446	0.386867	0	0.286513	0	0	0	0	0.262681	0	0.712084	0	0	0	0.751135	0	0	0.497633	0	0	0	0	0	0	0	0	0	0	0	0	0	0.724074	0	0	0	0.869361	0.263444	0	0.221121	0.609383	0	0.410474	0.617859	0.290608	0.412258	0	0	0.365581	0	0
hsa-mir-4447	0	0	0	0	0	0	0	0	0	0	0	0	0	0	0	0	0	0	0	0	0	0	0	0	0	0	0	0	0	0	0	0	0	0	0	0	0	0	0	0	0	0	0	0	0	0	0	0	0
hsa-mir-4448	0	0	0	0	0	0	0	0	0	0	0	0	0	0	0	0	0	0	0	0	0	0	0	0	0	0	0	0	0	0	0	0	0	0	0	0	0	0	0	0	0	0	0	0	0	0	0	0	0
hsa-mir-4449	0	2.05808	0.909778	0.760351	1.72135	1.1724	0	0	0.655751	1.82891	0	0.367374	0	2.96923	0	0.634248	0.497633	1.39061	1.06313	0.473115	1.38336	1.15673	0	0.578763	0.462865	1.64018	0.885202	0	0.290631	0.500352	0.724074	0	0	2.14168	0.581218	0.84909	0.46182	0	0.433392	0.135506	0	1.04907	0.920387	0	0.485863	0.318275	0.194339	1.0565	1.76534
hsa-mir-4450	0	0	0	0	0	0	0	0	0	0	0	0	0	0	0	0	0	0	0	0	0	0	0	0	0	0	0	0	0	0	0	0	0	0	0	0	0	0	0	0	0	0	0	0	0	0	0	0	0
hsa-mir-4451	0	0	0	0	0	0	0	0	0	0	0	0	0	0	0	0.351701	0	0	0	0	0	0	0	0.578763	0	0	0	0	0	0	0	0	0	0	0.220789	0	0	0	0	0	0	0	0	0	0	0	0	0	0
hsa-mir-4452	0	0	0	0	0	0	0	0	0	0	0	0	0	0	0	0	0	0	0	0	0	0	0	0	0	0	0	0	0	0	0	0	0	0	0	0	0	0	0	0	0	0	0	0	0	0	0	0	0
hsa-mir-4453	0	0	0.525446	0.760351	0.273647	0	0.111221	0.262681	1.10492	0.712084	0.459696	0.367374	0.675559	0	1.56762	0	0	0	0	0.828799	0	0	0	1.31075	0	0	0	0	0	0.500352	0	1.06317	0	0	0.99438	0.678994	1.43176	0	0.232909	0.25937	0.219786	0.849514	0.739388	0.732515	0	0.114074	0.194339	0.720654	0
hsa-mir-4454	0.386867	0	0.286513	0	0	0	0	0	0	0	0	0	0.675559	0	0.726588	0	0	0.856743	0.627355	0.473115	0.851499	0	0.980694	0.578763	0.812745	1.64018	0.885202	0.495159	0.532417	0	1.20394	0	1.01984	0.608844	0	0	0	0	0	0	0	0	0	0	0	0	0.194339	0	0.310287
hsa-mir-4455	0	0	0	0	0	0	0	0	0	0	0	0	0	0	0	0	0	0	0	0	0	0	0	0	0	0	0	0	0	0	0	0	0	0	0	0	0	0	0	0	0	0	0	0	0	0	0	0	0
hsa-mir-4456	0	0	0	0	0	0	0	0	0	0	0	0	0	0	0	0	0	0	0	0	0	0	0	0	0	0	0	0	0	0	0	0	0	0	0	0	0	0	0	0	0	0	0	0	0	0	0	0	0
hsa-mir-4457	0	0	0	0.429697	0	0	0	0	0	0	0	0.367374	0	0	0	0	0	0	0	0	0	0	0	0	0	0	0	0	0	0	0	0	0	0	0	0	0.958431	0	0	0	0	0	0	0.412258	0	0	0	0	0
hsa-mir-4458	0	0	0	0	0	0	0	0	0	0	0	0	0	0	0	0	0	0	0	0	0	0	0	0	0.462865	0	0	0	0	0	0	0	0	0	0	0	0	0	0	0	0	0.341756	0	0	0	0	0	0	0
hsa-mir-4459	0	0	0	0	0	0	0	0	0	0	0	0	0	0	0	0	0	0	0	0	0	0	0	0	0	0	0	0	0	0	0	0	0	0	0	0	0	0	0	0	0	0	0	0	0	0	0	0	0
hsa-mir-4460	0	0	0	0	0	0	0	0	0	0	0	0	0	0	0	0	0	0	0	0	0	0	0	0	0	0	0	0	0	0	0	0	0	0	0	0	0	0	0	0	0	0	0	0	0	0	0	0	0
hsa-mir-4461	2.48884	1.23642	0.525446	0.429697	0.876125	0.620465	0	1.13635	1.44695	1.18672	0	0	0.675559	0	0	0	0	1.39061	1.39736	1.35186	0.851499	0.691319	0.572121	1.57254	0.812745	1.64018	1.42977	0	1.22592	0	0.983867	0	0.59822	0.608844	2.16117	0.678994	1.0921	0.221121	0.766222	0.373436	0.219786	0.341756	0.532378	0.412258	0.848674	0.866154	0.365581	1.0565	0.782292
hsa-mir-4462	0	0	0	0	0	0	0	0	0	0	0	0	0	0	0	0	0	0	0	0	0	0	0	0	0	0	0	0	0	0	0	0	0	0	0	0	0	0	0	0	0	0	0	0	0	0	0	0	0
hsa-mir-4463	0	0	0	0	0	0	0	0	0	0	0	0	0	0	0	0	0	0	0	0	0	0	0	0	0	0	0	0	0	0	0	0	0	0	0	0	0	0	0	0	0	0	0	0	0	0	0	0	0
hsa-mir-4464	0	0	0	0	0	0	0	0	0	0	0	0	0	0	0	0	0	0	0	0	0	0	0	0	0	0	0	0	0	0	0	0	0	0	0.220789	0	0	0	0	0	0	0	0	0	0	0	0	0	0
hsa-mir-4465	0	0	0	0	0	0	0	0	0	0	0	0	0	0	0	0.351701	0	0	0	0	0	0	0	0.578763	0	0	0	0	0	0	0	0	0	0	0	0	0	0	0	0	0	0	0	0	0	0	0	0.720654	0
hsa-mir-4466	0	0	0.730372	0	0	0	0	0	0	0	0	0	0	0	0	0	0	0	0	0	0	0	0	0	0.462865	0	0	0	0	0	0	0	0	0.336305	0	0	0.249311	0	0	0	0	0	0	0	0	0.114074	0	0	0
hsa-mir-4467	0	0	0	0	0	0	0	0	0	0	0	0	0	0	0	0	0	0	0	0	0	0	0	0	0	0	0	0	0	0	0	0	0	0	0	0	0	0	0	0	0	0	0	0	0	0	0.194339	0	0
hsa-mir-4468	0	0	0	0	0	0	0	0	0	0	0	0	0	0	0	0	0	0	0	0	0	0	0	0	0	0	0	0	0	0	0	0	0	0	0	0	0	0	0	0	0	0	0	0	0	0	0	0	0
hsa-mir-4469	0	0	0.286513	0	0	0.237715	0.111221	0	0	0	0	0	0	0	0	0	0	0	0.627355	0	0.851499	0	0	0	0	0	0	0	0	0	0	0.627385	0	0	0.220789	0	0	0	0	0.135506	0.219786	0.341756	0	0	0	0.219784	0	0	0.310287
hsa-mir-4470	0	0	0.730372	0	0.273647	0	0.229065	0.484822	0	0	0.459696	0	0	0	0	0	0	0	0	0.473115	0	0	0	0	0	0	0	0	0.290631	0	0.406994	0	0	0.336305	0.220789	0	0	0	0.433392	0.135506	0	0	0	0	0	0.114074	0	0.282115	0
hsa-mir-4471	0	0	0	0	0	0	0.126884	0	0	0.712084	0	0	0	0	0	0	0	0	0	0	0	0	0	0	0	0	0	0	0	0	0	0	0	0	0	0	0	0	0	0	0	0	0	0	0	0	0	0	0
hsa-mir-4472-1	0	0	0	0	0	0	0	0	0	0	0	0	0	0	0	0	0	0	0	0	0	0	0	0	0	0	0	0	0	0	0	0	0	0	0	0	0	0	0	0	0	0	0	0	0	0	0	0	0
hsa-mir-4472-2	0	0	0	0	0	0	0	0	0	0	0	0	0	0	0	0	0	0	0	0	0	0	0	0	0	0	0	0	0	0	0	0	0	0	0	0	0	0	0	0	0	0	0	0	0	0	0	0	0
hsa-mir-4473	0.386867	0.746801	2.17473	3.22139	0.273647	0.620465	0.3514	0.998941	0.655751	0.712084	0	0	1.48111	1.6085	2.3011	0.351701	0.497633	1.39061	0	0	1.38336	1.79037	0	1.57254	1.09412	1.64018	2.13359	0.863107	0.739437	0	1.20394	0	1.01984	2.22505	0.220789	0.263444	1.32718	0	3.2869	1.36493	0.410474	0.341756	1.08119	0.412258	0.678643	0	0.783247	0.720654	1.13735
hsa-mir-4474	0	0	0.286513	1.02917	0	0.237715	0.126884	0.484822	0	0	0	0	0	0	0	0	0	0.856743	0	0	0	0	0	0	0	0.770352	0	0	0	0	0	0	0	0	0	0	0	0	0.433392	0	0.219786	0.341756	0	0	0	0	0.194339	0.282115	0
hsa-mir-4475	0	0	0	0	0	0	0	0	0	0	0	0	0	0	0	0	0	0	0	0	0	0	0	0	0	0	0	0	0	0	0	0	0	0	0	0	0	0	0	0	0	0	0	0	0	0	0	0	0
hsa-mir-4476	0	0	0	0	0.273647	0	0	0	0	0	0	0	0	0	0	0	0	0	0	0	0	0	0	0	0	0	0	0	0	0	0	0	0	0	0	0	0	0	0	0	0	0	0	0	0	0	0	0	0
hsa-mir-4477a	0	0	0	0	0	0	0	0	0	0	0	0	0	0	0	0	0	0	0	0	0	0	0	0	0	0	0	0	0	0	0	0	0	0	0	0	0	0	0	0	0	0	0	0	0	0	0	0	0
hsa-mir-4477b	0	0	0	0	0	0	0	0	0	0	0	0	0	0	0	0	0	0	0	0	0	0	0	0	0	0	0	0	0	0	0	0	0	0	0	0	0	0	0	0	0	0	0	0	0	0	0	0	0
hsa-mir-4478	0	0	0	0	0	0	0.111221	0	0	0	0	0	0	0	0	0	0	0	0.627355	0	0	0	0	0	0	0	0	0	0.290631	0	0	0	0	0.336305	0	0	0.46182	0	0	0.135506	0	0	0	0.412258	0	0	0	0	0
hsa-mir-4479	0	0.293986	0.909778	0.429697	0	0.441747	0.126884	0.262681	0	0	0	0	0	0	0	0	0	0	0	0	0	0	0	0.578763	0	0.770352	0.885202	0.495159	0.290631	0	0	0	0.59822	1.03568	0	0	0.647008	0	0.232909	0.373436	0.219786	0.341756	0	0.412258	0.263288	0.114074	0.194339	0.517984	0.310287
hsa-mir-448	0	0	0	0	0	0	0	0	0	0	0	0	0	0	0	0	0	0	0	0	0	0	0	0	0	0	0	0	0	0	1.39484	0	0	0	0	0	0.249311	0	0	0	0	0	0	0	0	0	0	0	0
hsa-mir-4480	0	0	0.286513	0	0	0	0	0	0	0	0	0	0.675559	0	0	0	0	0	0	0	0	0	0	0	0.462865	0	0	0	0	0	0	0	0	0	0	0	0	0	0	0	0	0	0	0	0	0	0	0	0
hsa-mir-4481	0	0	0	0	0	0	0	0	0	0	0	0	0	0	0	0	0	0	0	0	0	0	0	0	0	0	0	0	0	0	0	0	0	0	0	0	0	0	0	0	0	0	0	0	0	0	0	0	0
hsa-mir-4482	0	1.09093	0	0	0	0	0	0	0	0	0	0	0	0	0	0	0	0	0	0	0	0	0	0	0	0	0	0	0.290631	0	0	0	0	0	0	0	0	0	0	0	0	0	0	0	0	0	0	0.517984	0
hsa-mir-4483	0	0	0	0	0	0	0	0	0	0	0	0	0	0	0	0	0	0	0	0	0	0	0	0	0	0	0	0	0	0	0	0	0	0	0	0	0	0	0	0	0	0	0	0	0	0	0	0	0
hsa-mir-4484	0.386867	0.746801	0	0.760351	0	0.237715	0	0	0	0	0.807771	0.659931	0.675559	0	1.20754	0.351701	0.497633	0.856743	1.06313	0	0	1.15673	0.572121	0	0.462865	0	0	0	0.290631	1.16586	0.406994	1.39741	1.01984	1.50469	0.869361	0.263444	0.811106	0.733401	1.26401	0.669814	0	0.341756	0.532378	0.412258	0.485863	0.219784	0	0	0.565507
hsa-mir-4485	0	0	0	0	0	0	0	0	0	0	0	0	0	0	0	0	0	0	0	0	0	0	0	0	0	0	0	0	0	0	0	0	0	0	0	0	0	0	0	0	0	0	0	0	0	0	0	0	0
hsa-mir-4486	0	0	0	0	0	0	0	0	0	0	0	0	0	0	0	0	0	0	0	0	0	0	0	0	0	0	0	0	0	0	0	0	0	0	0	0	0	0	0	0	0	0	0	0	0	0	0	0	0
hsa-mir-4487	0	0	0.525446	0.760351	0	0	0	0	0	0	0	0	0	0	0	0	0	0	0	0	0	0	0	0	0	0	0	0	0	0	0	0.627385	0	0	0.220789	0.263444	0	0	0	0	0.219786	0	0	0.412258	0	0	0	0	0.310287
hsa-mir-4488	0	0	0	0	0	0.237715	0	0	0	0	0	0	0	0	0	0	0	0	0	0	0.851499	0.691319	0	0	0	0	0	0	0	0	0	0	0	0	0	0	0	0	0	0	0	0	0	0	0	0	0	0	0.310287
hsa-mir-4489	0.386867	0	0.286513	0.429697	0	0	0.111221	0	0	0	0	0	0	0	0	0	0	0	0	0	0	0	0	0	0	0	0	0	0	0	0	0	0	0	0	0	0	0	0	0	0	0	0	0	0	0	0	0	0.310287
hsa-mir-4490	0	0	0	0	0	0	0	0	0	0	0	0	0	0	0	0	0	0	0	0	0	0	0	0	0	0	0	0	0	0	0	0	0	0	0	0	0	0	0	0	0	0	0	0	0	0	0	0	0
hsa-mir-4491	0	0.538086	0	0.429697	0.503572	0	0.111221	0	0	0	0	1.11104	1.13385	0	0	1.07331	0	0	0	0	0	0.691319	0	1.57254	0.462865	0	1.82418	0.495159	0.532417	0	0	0	0.59822	0.837988	1.21597	1.00123	1.32718	0.995543	0.907669	0	0.410474	0.849514	0.290608	1.40808	0.263288	0.114074	1.10675	0.720654	0.310287
hsa-mir-4492	0	0	0	0.429697	0	0	0	0	0	0	0	0	0	0	0	0.351701	0	0	0	0	0	0	0	0	0	1.26985	0	0	0	0	0	1.06317	0	0	0.220789	0.263444	0.249311	0	0.433392	0	0	0	0	0.994435	0.263288	0	0.194339	0	0
hsa-mir-4493	0	0	0	0	0	0	0	0	0	0	0	0	0	0	0	0	0	0	0	0	0	0	0	0	0	0	0	0	0	0	0	0	0	0	0	0	0	0	0	0	0	0	0	0	0	0	0	0	0
hsa-mir-4494	0	0	0	0	0	0	0	0	0	0	0	0	0	0	0	0	0	0	0	0	0	0.691319	0	0	0	0.770352	0	0	0.290631	0	0	0	0	0.336305	0	0.263444	0.249311	0	0	0	0	0	0	0	0	0	0	0	0
hsa-mir-4495	0	0	0	0	0	0	0	0	0	0	0	0	0	0	0	0	0	0	0	0	0	0	0	0	0	0	0	0	0	0	0	0	0	0	0	0	0	0	0	0	0	0	0	0	0	0	0	0	0
hsa-mir-4496	0	0	0	0	0	0	0	0	0	0	0	0	0	0	0	0	0	0	0	0	0	0	0	0	0	0	0	0	0	0	0	0	0	0	0	0	0	0	0.609383	0	0.219786	0.849514	0.532378	0.412258	0	0	0.194339	0	0
hsa-mir-4497	0	0	0	0	0	0	0	0	0	0	0	0	0	0	0	0	0	0	0	0	0	0	0	0	0	0	0	0	0	0	0	0	0	0	0	0	0	0	0	0	0	0	0	0	0	0	0	0	0
hsa-mir-4498	0	0	0	0	0	0	0	0	0	0	0	0	0	0	0	0	0	0	0	0	0	0	0	0	0	0	0	0	0	0	0	0	0	0	0	0	0	0	0	0	0	0	0	0	0	0	0	0	0
hsa-mir-4499	0	0	0	0	0	0	0	0	0	0	0	0	0	0	0	0	0	0	0	0	0	0	0	0	0	0	0	0	0	0	0	0	0	0	0	0	0	0	0	0	0	0	0	0	0	0	0	0	0
hsa-mir-449a	0	0	0	0	0.273647	0	0	0	0.655751	0	0	0	0	0	0.726588	0.351701	0	0	0	0	0	0	0.572121	0	0	0	0	0	0	0	0	0	0.59822	0	0.220789	0.84909	0.811106	0	1.36559	0.988978	0.219786	0	0.290608	0.732515	0	0	0.194339	0	0.565507
hsa-mir-449b	0.386867	0	0	0	0	0	0	0	0	0	0	0	0.675559	0	0	0	0	0	0	0	0	0	0	0	0	0	0	0	0	0	0	0	0	0	0	0.263444	0.249311	0	0.609383	0	0.219786	0	0.290608	0.412258	0	0	0	0	0
hsa-mir-449c	0	0	0	0.429697	0	0	0	0	0	0	0	0	0	0	0	0	0	0	0	0	0	0	0	0	0	0	0	0	0	0	0	0	0	0	0.220789	0.263444	0	0	0.232909	0	0	0	0	0	0	0	0	0	0
hsa-mir-4500	0	0	0	0	0	0	0	0	0	0	0	0	0	0	0	0	0	0	0	0	0	0	0	0	0	0	0	0	0	0	0	0	0	0	0	0	0	0	0	0	0	0	0	0	0	0	0	0	0
hsa-mir-4501	0	0	0	0	0	0	0	0	0	0	0	0	0.675559	0	0	0	0.86694	0.856743	0	0	0	0	0	0	0	0	1.42977	0	0	0	0	0	0	0	0	0.263444	0	0	0	0.135506	0	0	0.532378	0.732515	0	0.114074	0	0	0
hsa-mir-4502	0	0	0	0	0	0	0	0	0	0	0	0	0	0	0	0	0	0	0	0	0	0	0	0	0	0	0	0	0	0	0	0	0	0	0	0	0	0	0	0	0	0	0	0	0	0	0	0	0
hsa-mir-4503	0	0	0	0	0	0	0	0	0	0	0	0	0	0	0	0	0	0	0	0	0	0	0	0	0	0	0	0	0	0	0	0	0	0	0	0	0	0	0	0	0	0	0	0	0	0	0	0	0
hsa-mir-4504	0	0	0	0	0	0	0	0	0	0	0	0	0	0	0	0	0	0	0	0	0	0	0	0	0	0	0	0	0	0	0	0	0	0	0	0	0	0	0	0	0	0	0	0	0	0	0	0	0
hsa-mir-4505	0	0	0	0	0	0	0	0	0	0	0	0	0	0	0	0	0	0	0	0	0	0	0	0	0	0	0	0	0	0	0	0	0.59822	0	0	0	0.249311	0	0	0	0	0	0	0	0	0	0	0	0
hsa-mir-4506	0	0	0	0	0	0	0	0	0	0	0	0	0	0	0	0	0	0	0	0	0	0	0	0	0	0	0	0	0	0	0	0	0	0	0	0	0	0	0	0	0	0	0	0	0	0	0	0	0
hsa-mir-4507	0	0	0	0	0.273647	0	0	0	0	0	0	0	0	0	0	0	0	0	0	0	0	0	0	0	0	0	0	0	0	0	0	0	0	0	0.220789	0	0	0	0	0	0	0	0	0	0	0	0	0	0
hsa-mir-4508	0	0	0	0	0	0	0	0	0	0	0	0	0	0	0	0	0	0	0	0	0	0	0	0	0	0	0	0	0	0	0	0	0	0	0	0	0	0	0	0	0	0	0	0	0	0	0	0	0
hsa-mir-4509-1	0	0	0	0	0	0	0	0	0	0	0	0	0	0	0	0	0	0	0	0	0	0	0	0	0	0	0	0	0	0	0	0	0	0	0	0	0	0	0	0	0	0	0	0	0	0	0	0	0
hsa-mir-4509-2	0	0	0	0	0	0	0	0	0	0	0	0	0	0	0	0	0	0	0	0	0	0	0	0	0	0	0	0	0	0	0	0	0	0	0	0	0	0	0	0	0	0	0	0	0	0	0	0	0
hsa-mir-4509-3	0	0	0	0	0	0	0	0	0	0	0	0	0	0	0	0	0	0	0	0	0	0	0	0	0	0	0	0	0	0	0	0	0	0	0	0	0	0	0	0	0	0	0	0	0	0	0	0	0
hsa-mir-450a-1	3.35425	2.68359	3.15523	2.92449	1.80996	2.30472	1.46264	2.76373	2.33	1.54325	0.459696	1.29279	2.5305	1.24259	2.09545	1.80098	2.10271	2.5523	2.26697	1.11391	0.851499	2.70771	0.572121	2.307	2.36766	3.24309	4.02205	2.46054	1.08125	1.16586	2.91043	2.26704	2.8412	2.44965	3.81396	1.92781	3.18768	1.40946	3.09317	1.90973	2.75694	2.89048	3.31125	3.76226	1.00076	1.40359	1.90296	1.84467	4.33602
hsa-mir-450a-2	2.63886	2.68359	3.19038	3.05067	2.11828	2.19613	1.71551	2.5832	1.44695	2.06724	1.08798	0.903046	2.8016	1.90013	2.91594	2.01318	2.35585	2.08535	2.26697	1.11391	1.38336	2.70771	0.572121	2.44417	2.00942	3.01022	3.36699	3.381	0.739437	1.16586	1.97573	2.26704	3.35745	3.10652	3.92807	2.1394	3.21725	1.2173	2.64526	1.74995	2.52914	2.66584	3.5221	3.53413	1.00076	1.86114	1.78718	1.92892	4.403
hsa-mir-450b	3.73358	3.22695	4.90684	4.49256	3.09068	3.48672	2.25944	4.01593	4.09695	3.56668	3.21032	3.18905	3.6261	4.22967	4.06292	3.59007	2.75842	3.88617	3.69867	3.5209	3.04254	3.51739	1.29873	3.37543	3.48716	4.37568	5.38049	4.39673	1.87896	2.36334	4.29112	3.43372	4.87094	4.1539	4.77922	2.20356	3.66626	1.57902	3.85704	3.30203	4.01253	3.92284	4.41327	3.83093	2.53731	2.4874	1.90296	2.77217	4.49798
hsa-mir-4510	0	0.293986	0.286513	0.429697	0.503572	0	0.338005	0.484822	0	0	0.459696	0.367374	0	0	0.726588	0	0	0	0.627355	0.828799	0	0	0	0	0.462865	0	0	0	0	0	0.724074	0	0.59822	0	1.79932	0.263444	1.21442	0.221121	1.03648	0.373436	0.410474	0.617859	0.290608	0.412258	0.263288	0.929849	0.365581	0.282115	0
hsa-mir-4511	0	0	0	0	0	0	0.214479	0	0	0.712084	0	0	0	0	0	0	0	0	0	0	0	0	0	0	0	0	1.42977	0.495159	0	0	0	0	0	0	0	0	0.249311	0	0.433392	0	0	0	0	0	0	0	0	0	0
hsa-mir-4512	0	0	0.286513	0	0	0	0	0	0	0	0	0	0	0	0	0.351701	0	0	0.627355	0	0	0	0	0	0	0	0	0	0	0	0	0	0	0	0.220789	0.263444	0	0	0	0	0.410474	0	0	0	0	0	0	0	0.782292
hsa-mir-4513	0	0	0	0	0	0	0	0	0	0	0	0	0	0	0	0	0	0	0	0.473115	0	0	0	0	0	0	0	0	0	0	0	0	0	0	0	0	0	0	0	0	0	0	0	0	0	0	0	0	0
hsa-mir-4514	0	0	0	0	0	0	0	0	0	0	0	0	0	0	0	0	0	0	0	0	0	0	0	0	0	0	0	0	0	0	0	0	0	0	0	0	0	0	0	0	0	0	0	0	0	0	0	0	0
hsa-mir-4515	0.386867	0	0.286513	0.760351	0	0	0.111221	0	0.655751	0	0	0	0	0	0	0	0	0.856743	0	0	0	0	0	0	0	0	0	0	0.290631	0	0.724074	0	0.59822	0	0.220789	0	1.0921	0	0	0	0	0	0.920387	0	0	0.219784	0	0	0
hsa-mir-4516	0	0	0.286513	0	0	0	0	0	0	0	0	0	0	0	0	0	0	0	0	0	0	0	0	0	0	0	0	0	0	0	0	0	0	0.336305	0	0	0	0.221121	0	0	0	0	0	0.412258	0	0	0	0	0.310287
hsa-mir-4517	0	0	0	0	0.273647	0.779466	0.126884	0.677277	0	0	0	0	0	0	0	0	0.497633	0	0.627355	0	0	0	0	0	0	0	0	0	0	0	0	0	0	0.336305	0	0	0	0	0	0	0	0	0	0	0	0	0	0	0
hsa-mir-4518	0	0	0	0	0	0	0	0	0	0	0	0	0	0	0	0	0	0	0	0	0	0	0	0	0	0	0	0	0	0	0	0	0	0	0	0	0	0	0	0	0	0	0	0	0	0	0	0	0
hsa-mir-4519	0	0	0.286513	0	0	0	0	0	0	0	0	0	0.675559	0	0.726588	0	0	0	0	0	0	0	0	0	0	0	0	0	0	0.500352	0.724074	0	0.59822	0	0	0.263444	0.46182	0	0.232909	0	0	0	0	0	0	0	0	0	0
hsa-mir-451a	10.1601	7.90088	9.56196	6.96419	7.76545	8.37746	6.11321	5.35548	6.92203	6.65183	8.04468	6.6795	9.09973	8.0776	8.03471	5.33904	9.09368	7.51295	9.57774	7.80588	6.3618	8.564	5.7432	8.11067	7.77155	6.57836	6.28686	8.5021	7.01486	6.68042	6.11097	6.22	8.81904	7.2892	9.41781	10.6258	7.82648	11.3427	7.98366	6.26541	7.96947	10.7109	8.72827	10.2112	4.77757	5.49248	12.4975	6.0493	8.09965
hsa-mir-451b	0	0	0.286513	0	0	0	0	0	0	0	0	0	0	0	0	0	0	0	0	0	0	0	0	0	0	0	0	0	0	0	0	0	0	0	0	0	0	0	0	0	0	0	0	0	0	0	0	0	0
hsa-mir-452	4.90255	5.04855	5.91447	4.1419	5.3611	5.29765	3.93089	5.98432	4.77979	3.71427	6.59528	4.20165	4.76964	4.6386	4.06292	4.47618	3.98443	4.87691	3.35902	5.67427	4.94307	5.19598	1.97094	5.9589	5.97813	3.98362	5.4933	6.23103	4.72476	3.15001	3.9696	4.16089	6.66838	4.37079	6.10438	4.63463	4.7865	4.20101	5.36182	5.33245	4.45281	4.35845	5.22398	4.18586	5.84949	4.43644	4.93362	6.57237	5.4657
hsa-mir-4520-1	0	0	0	0	0	0	0	0	0	0	0	0	0	0	0	0	0	0	0	0	0	0	0	0	0	0	0	0	0	0	0	0	0	0	0	0	0.249311	0.221121	0	0	0	0	0	0	0	0	0	0	0
hsa-mir-4520-2	0	0	0	0	0	0	0	0	0	0	0	0	0	0	0	0	0	0	0	0	0	0	0	0	0	0	0	0	0	0	0	0	0	0	0	0	0	0	0	0	0	0	0	0	0	0	0	0	0
hsa-mir-4521	0	0	0.286513	0	0.876125	0.237715	0.785485	0	0.655751	0	0.459696	0.367374	1.13385	1.24259	1.56762	0	1.16072	1.7794	0	0.828799	0	0.691319	0	0.990691	0.812745	0.770352	1.42977	0.863107	0	1.16586	1.20394	0	1.34571	0.608844	1.57746	0.84909	0.46182	1.93201	1.36559	0.669814	0.410474	0.617859	0.920387	0.412258	0.263288	0.866154	0.657	0.898329	0.310287
hsa-mir-4522	0	0	0.286513	2.04354	0	0	0.126884	0.262681	0	0.712084	0	0.367374	0	0	0	0.634248	0	0	0	0	0	1.15673	0	0	0	0.770352	0	0	0.532417	0.500352	0.406994	1.39741	1.01984	0.608844	0.869361	0	0.811106	0	0.609383	0	0.578873	0	0.739388	0.412258	0.263288	0	0	0.720654	0.565507
hsa-mir-4523	0.943099	0.293986	0.286513	0.760351	0.273647	0	0	0	0	0	0	0	0	0.751135	0	0	0	0.856743	0	0	0	0	0	0	0	0	0.885202	0.863107	0	0	0	0.627385	0	0.608844	0	0	0	0	0.232909	0	0.410474	0	0	0	0.263288	0	0	0	0
hsa-mir-4524a	0.386867	0	0	0	0	0	0.111221	0	0	0	0	0	0	0	0.726588	0.351701	0	0	0	0	0	0	0	0	0	0	0	0	0	0	0.406994	0	0	0.336305	0.220789	0.263444	0.46182	0.221121	0	0.135506	0.578873	0	0.532378	0	0	0	0.365581	0.282115	0
hsa-mir-4524b	0	0	0	0	0	0	0	0	0	0	0	0	0	0	0	0	0	0	0	0	0	0	0	0	0	0	0	0	0	0	0	0	0	0	0	0	0	0	0	0	0	0	0	0	0	0	0	0	0
hsa-mir-4525	0.386867	0	0.909778	0.429697	0.273647	0	0	0	0	1.18672	0	0.367374	0	0	0	0	0	0	1.06313	0.473115	0	0.691319	0	0.990691	0.812745	0	0.885202	0.863107	0	0.500352	0.406994	0	0.59822	1.03568	0	0	0.249311	0	0.232909	0	0.219786	0.341756	0	0	0	0	0	0	0
hsa-mir-4526	0	0	0	0	0	0	0	0	0	0	0	0	0	0	0	0	0	0	0	0	0	0	0	0	0	0	0	0	0	0	0	0	0	0	0	0	0.249311	0	0	0	0	0	0	0	0	0	0	0	0
hsa-mir-4527	0	0	0	0	0	0	0	0	0	0	0	0	0	0	0	0	0	0	0	0	0	0	0	0	0	0	0	0	0	0	0	0	0	0	0	0	0	0	0	0	0	0	0	0	0	0	0	0	0
hsa-mir-4528	0	0	0	0	0	0	0	0	0	0	0	0	0	0	0	0	0	0	0	0	0	0	0	0	0	0	0	0	0	0	0	0	0	0	0	0	0	0	0	0	0	0	0	0	0	0	0	0	0
hsa-mir-4529	0	0	0	0.429697	0	0	0.111221	0	0	0	0	0	0	0	0.726588	0	0	0	0	0	0	0	0	0	0.462865	0	0	0	0	0	0	0	0	0	0.220789	0	0.46182	0	0	0	0.219786	0	0	0	0.263288	0.114074	0	0.282115	0.310287
hsa-mir-4530	0	0	0	0	0	0	0	0	0	0	0	0	0	0	0	0	0	0	0	0	0	0	0	0	0	0	0	0	0	0	0	0	0	0	0	0.263444	0	0	0	0.135506	0	0	0	0	0	0	0	0	0
hsa-mir-4531	0	0	0	0	0	0	0	0	0	0	0	0	0	0	0	0	0	0	0	0	0	0	0	0	0	0	0	0	0	0	0	0	0	0	0	0	0	0	0	0	0	0	0	0	0	0	0	0	0
hsa-mir-4532	0	0	0.286513	0.760351	0	0	0	0	0	0	0	0	0	0	0	0	0	0	0	0	0	0	0	0	0	0	0	0	0	0	0	0	0	0.336305	0	0	0	0	0	0	0	0	0	0	0	0	0.194339	0.282115	0.970717
hsa-mir-4533	0	0	0	0	0	0	0	0	0	0	0	0	0	0	0	0	0	0	0	0	0	0	0	0	0	0	0	0	0	0	0	0	0	0	0	0	0	0	0	0	0	0	0	0	0	0	0	0	0
hsa-mir-4534	0	0	0	0	0	0	0	0	0	0	0	0	0	0	0	0	0	0	0	0	0	0	0	0	0	0	0	0	0	0	0	0	0	0	0	0	0	0	0	0	0	0	0	0	0	0	0	0	0
hsa-mir-4535	0	0	0	0	0	0	0	0	0	0	0	0	0	0	0	0	0	0	0	0	0	0	0	0	0	0	0	0	0	0	0	0	0	0	0	0	0	0	0	0	0	0	0	0	0	0	0	0	0
hsa-mir-4536-1	0	0	0.286513	0	0.273647	0	0.413983	0	0	0	0.459696	0	0	0	0	0	0	0	0	0	0.851499	0	0.572121	0.578763	0	0	0	0	0	0	0.724074	0	0	0.336305	0.220789	0	0.811106	0.733401	0.232909	0.25937	0.578873	0	0.290608	0	0	0.219784	0.194339	0	0.310287
hsa-mir-4536-2	0	0.293986	0.286513	0.429697	0	0.237715	0.111221	0	0	0	0	0.367374	0	0	0.726588	0.351701	0	0	0	0	0	0	0	0	0	0	0	0	0	0	0	0	0	0	0.869361	0.263444	0.46182	0.412811	0.232909	0.135506	0.219786	0	0.739388	0.412258	0	0	0.518636	0.517984	0.565507
hsa-mir-4537	0	0	0	0	0	0	0	0	0	0	0	0	0	0	0	0	0	0	0	0	0.851499	0	0	0	0	0	0	0	0	0	0	0	0	0	0	0	0	0	0	0	0	0	0	0	0	0	0	0	0
hsa-mir-4538	0	0	0	0	0.273647	0	0	0	0	0	0	0	0	0	0	0	0	0	0	0	0	0	0	0	0	0	0	0	0	0	0	0	0	0	0	0	0	0	0	0	0	0	0.290608	0.412258	0	0	0	0	0
hsa-mir-4539	0	0	0	0	0.273647	0	0	0	0	0	0	0	0	0	0	0	0	0	0	0	0	0	0	0	0	0	0	0	0	0	0	0	0	0	0.220789	0	0	0	0	0	0	0	0	0	0	0	0	0	0
hsa-mir-454	4.49369	3.32782	3.89146	4.32785	4.07667	4.19967	3.71171	4.49622	4.09695	3.21664	2.13003	1.73119	4.52963	3.30458	4.36748	3.17086	2.57113	3.71854	4.16081	2.03732	4.28545	4.45298	3.2132	3.88946	4.39565	4.2205	3.58632	4.24921	3.13932	2.47512	3.5947	2.91402	3.28324	4.1539	3.4492	2.88965	4.70537	2.96184	4.30354	3.13418	2.75694	3.51407	4.33567	3.61425	1.76661	2.56968	2.6959	3.56057	3.43804
hsa-mir-4540	0	0	0	0	0	0	0	0	0	0	0	0	0	0	0	0	0	0	0	0	0	0	0	0	0	0	0	0	0	0	0	0	0	0	0	0	0	0	0	0	0	0	0	0	0	0	0	0	0
hsa-mir-455	8.522	5.33371	9.25417	10.4878	7.17062	7.80163	5.61241	8.54401	9.16669	8.83092	6.10686	5.15017	10.1433	8.78439	9.1397	6.22321	7.18153	9.48433	9.30456	6.52676	6.955	9.70815	6.67575	8.37584	7.51232	8.17805	9.31157	8.07914	6.76545	7.46237	10.0678	8.74911	8.9877	10.902	6.26501	7.18235	9.11348	5.94541	10.1159	7.09697	6.32766	8.80193	8.41589	8.80586	4.56217	6.52229	6.99394	8.44415	9.93983
hsa-mir-4632	0	0.538086	0.286513	0.429697	0	0	0.126884	0	0.655751	0.712084	0.459696	0	1.13385	0	0.726588	0	0	1.39061	0	0	0	0	0	0	0.462865	0.770352	1.42977	0.495159	0	0	0	0.627385	0	0.336305	1.21597	0.84909	0.647008	0.581993	0.232909	0.25937	0.410474	0	0.739388	0	0	0	0.194339	0.720654	0.310287
hsa-mir-4633	0	0	0	0	0	0	0	0	0	0	0	0	0	0	0	0	0	0	0	0	0	0	0	0	0	0	0	0	0	0	0	0	0	0	0	0	0	0	0	0	0	0	0	0	0	0	0	0	0
hsa-mir-4634	0	0	0	0	0	0	0	0	0	0	0	0	0	0	0	0	0	0	0	0	0	0	0	0	0	0	0	0	0	0	0	0	0	0	0	0.263444	0	0.221121	0	0	0	0	0	0	0	0.219784	0	0	0
hsa-mir-4635	0	0	0	0	0	0	0	0	0	0	0	0	0	0	0	0	0	0	0	0	0	0	0	0	0	0	0	0	0	0	0	0	0	0	0	0	0	0	0	0	0	0	0	0	0	0	0	0	0
hsa-mir-4636	0.943099	0.293986	0	0	0.273647	0.922669	0	0.262681	0	0.712084	1.08798	0.367374	1.13385	0.751135	0	0.351701	0	0	0.627355	0	0	1.15673	0.572121	0.578763	0	0	0	0	0.920445	0	1.20394	0	1.01984	0.336305	1.49522	0.486129	0.249311	0	0.609383	0.25937	0	0	0.290608	0	0.848674	0.114074	0.365581	0.720654	0.310287
hsa-mir-4637	0	0.293986	0	0	0	0	0	0	0	0	0	0	0	0	0	0.351701	0	0	0	0	0	0	0	0	0	0	0	0	0	0	0	0	0	0	0	0	0	0	0	0	0	0	0	0	0	0	0	0	0
hsa-mir-4638	1.15718	0.538086	1.77255	1.62373	0.273647	0.237715	0.510245	1.13635	1.44695	0.712084	0.459696	0	0.675559	0	1.20754	0.351701	1.16072	0.856743	1.06313	0.473115	0	1.15673	0	0.990691	1.86708	1.64018	0.885202	2.34901	0.920445	1.16586	0.983867	1.06317	2.02966	2.05319	0	0.486129	0.46182	0.412811	1.6334	0.838204	0.410474	0.849514	1.35732	1.21603	0	0.318275	0.194339	1.7552	1.76534
hsa-mir-4639	0	0	0	0	0	0	0	0	0	0	0	0	0	0	0	0	0	0	0	0	0	0	0	0	0	0.770352	0	0	0	0	0	0	0	0.336305	0	0	0	0	0	0	0	0	0	0	0	0	0	0	0
hsa-mir-4640	0.691626	0	0.909778	0.429697	0.273647	0.237715	0.510245	0.677277	0	0.712084	0	0	0.675559	0	0	0.351701	0.497633	0.856743	0	0	0	0.691319	0	0	0	1.26985	0	0.495159	0	0.500352	0.406994	0.627385	0	0.837988	0	0.263444	0.249311	0	0.232909	0.135506	0	0	0.290608	0.412258	0	0	0	0.282115	0.970717
hsa-mir-4641	0	0	0	0	0	0	0	0	0	0	0	0	0	0	0	0	0	0	0	0	0	0	0	0	0	0	0	0	0	0	0	0	0	0	0	0	0	0	0	0	0	0	0	0	0	0	0	0	0
hsa-mir-4642	0.386867	0	0	0	0	0	0	0	0	0	0	0	0	0	0	0	0	0	0.627355	0	0	0	0	0	0	0	0	0	0	0	0	0	0	0	0	0	0	0	0	0	0	0	0	0	0	0	0	0	0
hsa-mir-4643	0	0	0	0	0	0	0	0	0	0	0	0	0	0	0	0.351701	0	0	0	0	0	0	0	0	0	0	0	0	0	0	0.983867	0	0	0	0	0	0	0	0	0	0	0	0	0	0	0	0	0	0
hsa-mir-4644	0	0	0	0	0	0	0	0	0	0	0	0	0	0	0	0	0	0	0	0	0	0	0	0	0	0	0	0	0	0	0	0	0	0	0	0	0	0	0	0	0.410474	0	0	0	0	0	0	0	0
hsa-mir-4645	0.386867	0.538086	1.06932	1.45141	0	0.237715	0.413983	0.262681	0.655751	0.712084	0.459696	0	0	1.6085	0	0.351701	0.497633	0	1.06313	0	1.38336	0	0	0	1.09412	0	0	0.495159	0.290631	0.500352	0	0.627385	0.59822	1.03568	0.581218	0	1.70649	0	0.433392	0.135506	0.410474	0	1.08119	0.412258	0	0.219784	0	0.898329	0.565507
hsa-mir-4646	0.386867	0	0	0	0	0	0	0	0	0	0	0	0	0	0.726588	0	0	0	0	0	0	0	0	0	0	0	0	0	0	0.500352	0	0	0	0.336305	0	0	0.249311	0	0	0	0.219786	0	0	0	0	0	0.194339	0	0
hsa-mir-4647	0.691626	0	0.286513	0	0.273647	0	0.126884	0.262681	0	0	0	0	0	0	0	0.351701	0	0.856743	0.627355	0.473115	0	0	0	0.578763	0	0	0	0	0	0	0	0	0.59822	0.608844	0.220789	0	0	0	0	0	0	0	0	0.412258	0.263288	0	0	0.282115	0
hsa-mir-4648	0.386867	0.538086	0	0	0	0	0	0.262681	0	0	0	0	0	0	0	0	0	1.39061	0	0	0	0	0	0.578763	0	0	0	0	0.290631	0	0	0	0	0.336305	0	0	0	0	0	0	0	0	0.532378	0	0	0	0	0	0
hsa-mir-4649	0	0	0.286513	0.429697	0.273647	0	0	0.262681	0	0	0	0	0	0.751135	0	0.351701	0	0	0	0	0	0	0	0	0	0	0	0	0	0.500352	0.406994	0	0	0	0.220789	0.263444	0	0	0	0	0.219786	0.341756	0.532378	0	0	0.114074	0.365581	0	0.782292
hsa-mir-4650-1	0	0	0	0	0	0	0	0	0	0	0	0	0	0	0	0	0	0	0	0	0	0	0	0	0	0	0	0	0	0	0	0	0	0	0	0	0	0	0	0	0	0	0.290608	0	0	0	0	0	0
hsa-mir-4650-2	0	0	0	0	0	0	0	0	0	0	0	0	0	0	0	0	0	0	0	0	0	0	0	0	0	0	0	0	0	0	0	0	0	0	0	0	0	0	0	0	0	0	0	0	0	0	0	0	0
hsa-mir-4651	0	0	0	0	0	0	0	0	0	0	0	0	0	0	0	0	0	0	0	0	0	0	0	0	0.462865	0	0	0	0.290631	0	0	0	0	0	0	0	0	0	0	0	0	0	0	0	0	0	0	0	0
hsa-mir-4652	2.8989	0	0	0	1.52594	0	0	2.32023	0	0	0	0	0	0.751135	0	0	0	0	0	0	0	0	1.7797	0.578763	0	0	0	0	0	0	2.84649	0.627385	0	0	0.220789	0	5.0556	0	0	0.577625	0	0	1.69223	0	0	2.01591	0	0	0
hsa-mir-4653	0	0	0	0	0.273647	0.441747	0	0	0	0	0	0	0	0	0	0	0	0	0	0	0	0	0	0	0	0	0	0	0	0	0	0	0	0	0	0	0	0	0	0	0	0	0	0	0	0.114074	0	0	0
hsa-mir-4654	0	0	0.286513	0	0.273647	0.237715	0	0	0	0	0	0	0	0	0	0	0	0	0	0	0	0	0	0	0	0	0	0.495159	0	0	0	0	0	0	0	0	0	0	0	0	0	0	0.290608	0	0	0	0	0.282115	0
hsa-mir-4655	0	0	0	0	0	0	0	0	0	0	0	0	0	0	0	0	0	0	0	0	0	0	0	0	0	0	0	0	0	0	0	0	0	0	0	0	0	0	0	0.135506	0	0	0	0	0	0	0	0	0
hsa-mir-4656	0	0	0	0	0	0	0	0	0	0	0	0	0	0	0	0	0	0	0	0	0	0	0	0	0	0	0	0	0	0	0	0	0	0	0	0	0	0	0	0	0	0	0	0	0	0	0	0	0
hsa-mir-4657	0	0	0.286513	0	0	0	0.111221	0	0.655751	0	0	0	0	0	0	0.351701	0.497633	0	0	0	0	0	0	0	0	0	0	0	0.532417	0.500352	0	0	0	0	0.220789	0	0.249311	0	0	0.135506	0	0	0	0	0	0	0	0	0.565507
hsa-mir-4658	0	0	1.34359	0	0.273647	0.237715	0.765612	0.677277	0	0	0	0.659931	0	0	0.726588	0.634248	0.497633	0.856743	0	0	0	0	0	0	0	0	0	0	0.532417	0	0	0	0	0	0	0	1.21442	0	0	0.135506	0	0	0	0	0	0	0	0	0
hsa-mir-4659a	0	0	0.286513	0.429697	0	0.237715	0	0	0	0	0	0	0	0	0	0	0	0	0	0	0	0.691319	0	0	0.812745	0	0	0	0	0	0	0	1.01984	0.336305	0.41223	0	0.811106	0	0.232909	0	0	0.341756	0	0	0	0	0	0	0
hsa-mir-4659b	0	0	0.525446	0	0	0	0	0	0	0	0	0	0	0	0	0	0	0	0	0	0	0	0	0	0	0	0	0	0	0	0	0	0	0	0.41223	0	0	0	0.232909	0	0	0	0	0	0	0	0	0	0
hsa-mir-466	0.386867	0	0	0	0	0.237715	0	0	0	0	0	0	0	0.751135	0	0	0	0	0	0	0	0	0	0	0	0	0	0	0	0	0.406994	0	0	0	0.41223	0	0.249311	0	0	0	0	0	0	0	0	0	0	0.282115	0
hsa-mir-4660	0.386867	0	0.525446	0.760351	0	0.441747	0.126884	0.484822	0	0	0.459696	0.367374	0.675559	0	0	2.70515	0	0.856743	0	0.473115	1.38336	0.691319	0	0	0	1.26985	0	0.863107	0	0.500352	0.983867	0	1.01984	1.20951	0.220789	0.486129	0.46182	0.221121	0.609383	0.479139	0.410474	0.341756	2.26112	0.412258	0	0.219784	0	0	0
hsa-mir-4661	2.77473	1.60132	1.86246	3.32492	1.62695	1.88239	0.775582	2.19998	2.15465	3.00358	1.08798	2.06696	2.92017	2.35013	2.64103	3.80478	2.10271	2.08535	1.66854	1.73492	2.32823	4.32607	1.55916	3.15333	5.09964	5.67536	4.29532	4.15287	1.78865	1.16586	6.5678	2.09375	3.28324	2.64394	2.69092	1.5866	1.70649	0.870418	2.37986	1.18917	1.98626	1.5216	2.56302	1.21603	1.67912	1.21193	1.78718	1.19903	1.54579
hsa-mir-4662a	4.13814	2.63192	2.8382	1.91671	3.31918	3.41585	1.80875	2.67628	3.57692	1.82891	3.70134	3.47899	2.37309	2.96923	1.20754	3.12595	2.57113	2.5523	2.80571	5.65217	1.38336	1.79037	1.7797	3.62668	1.86708	2.73237	3.36699	3.13423	1.69231	2.67565	2.29603	2.42172	1.01984	1.50469	3.18637	2.48745	1.52927	3.86615	2.37986	2.96254	3.20602	3.03862	3.1022	2.99025	1.13833	2.44443	3.7129	2.28912	1.54579
hsa-mir-4662b	0	0	0	0	0	0	0	0	0	0	0	0	0	0	0	0	0	0	0	0	0	0	0	0	0.462865	0	0	0	0	0	0	0	0	0	0	0	0	0.221121	0	0	0	0	0	0	0	0.114074	0	0	0
hsa-mir-4663	0	0	0	0	0	0	0	0	0	0	0	0	0	0	0	0	0	0	0	0	0	0	0	0	0	0	0	0	0	0	0	0	0	0	0	0	0	0	0	0	0	0	0	0	0	0	0	0	0
hsa-mir-4664	0.386867	0.746801	1.57396	0	0.701841	0.620465	0.324485	0.484822	0	1.18672	0	0.367374	0	0	0	0.351701	1.16072	0.856743	0	0	0	1.79037	0	0.990691	0.812745	1.93461	2.13359	0.863107	0.290631	0.500352	1.20394	0	0	1.03568	0.581218	0	0	0	0.609383	0.669814	0.219786	0	1.22585	0.412258	0	0	0.194339	0.720654	0.782292
hsa-mir-4665	0.386867	0	0	0.429697	0	0	0	0	0	0	0	0	0	0	0.726588	0	0	0	0	0	0	0	0	0	0	0.770352	0	0	0	0.500352	0	0.627385	0	0.336305	0	0.263444	0.249311	0	0	0.135506	0	0	0	0	0	0	0	0.282115	0.310287
hsa-mir-4666a	0	0	0.525446	0	0	0	0.243505	0	0.655751	0	0	0	0	0	0	0	0	0	0	0	0	0	0.572121	0.578763	0.812745	0	0	0	0	0	0	0.627385	0	0	0.220789	0	0	0.221121	0.232909	0	0	0	0.290608	0	0	0	0	0	0
hsa-mir-4666b	0	0	0	0	0	0	0	0	0	0	0	0	0	0	0	0	0	0	0	0	0	0	0	0	0	0	0	0	0	0	0	0	0	0	0	0	0	0	0	0	0	0	0	0	0	0	0	0	0
hsa-mir-4667	0	0	0.286513	0.429697	0	0	0.126884	0	0	0	0	0	0	0	0	0	0	0	0	0	0	0	0	0	0	0	0	0	0	0	0	0	0	0.336305	0.220789	0	0	0	0.232909	0	0	0.341756	0	0	0	0	0	0	0
hsa-mir-4668	1.34355	1.80168	1.94709	3.59723	1.72135	2.19613	1.18604	1.84647	2.15465	1.82891	1.32251	1.11104	2.8016	3.08988	2.48105	1.07331	1.61328	0.856743	1.89672	1.11391	0.851499	2.70771	0.572121	1.57254	2.25784	2.38795	1.82418	1.78946	1.3574	1.80213	1.85094	2.42172	1.34571	1.95892	2.16117	1.67976	2.25483	1.65686	2.47386	1.47124	2.208	1.38061	2.44972	2.10691	0	1.26229	1.00676	2.15563	2.27479
hsa-mir-4669	0	0	0	0	0	0	0	0	0	0	0	0	0	0	0	0	0	0	0	0	0	0	0	0	0	0	0	0	0	0	0	0	0	0	0	0	0	0	0.232909	0	0	0	0	0	0	0	0	0	0
hsa-mir-4670	0	0	0.286513	0	0.273647	0	0.111221	0	0	0	0	0	0	0.751135	0	0	0	0	0	0	0	0	0	0	0	0	0	0	0.290631	0	0	0	0	0	0	0.263444	0	0	0	0.135506	0	0	0	0	0	0	0	0.282115	0
hsa-mir-4671	0	0	0	0	0	0	0.126884	0	0	0	0	0	0	0	0	0	0	0	0	0	0	0	0	0	0	0	0	0	0	0	0	0	0	0	0	0	0	0	0	0	0	0	0	0	0	0	0	0	0
hsa-mir-4672	0	0	0.286513	0.429697	0	0.237715	0	0	0	0	0	0	0	0	0	0	0	0	0	0	0	0	0	0	0	0	0	0	0	0	0	0	0	0	0.220789	0	0	0	0	0	0	0	0	0	0	0	0	0	0
hsa-mir-4673	0	0	0	0	0	0	0	0	0	0	0	0	0	0	0	0	0	0	0	0	0	0	0.572121	0	0	0	0	0.495159	0	0	0	0	0	0	0	0	0.46182	0	0	0	0	0	0	0	0	0	0.194339	0	0
hsa-mir-4674	0	0	0.525446	0	0.273647	0	0.229065	0	0	0.712084	0	0	0	0	0	0	0	0.856743	0	0	0	1.15673	0	0.990691	1.09412	0	0.885202	0	0	0	0	0	0	0.608844	0	0	0.958431	0	0.232909	0.373436	0.219786	0	0	0	0	0	0	0	0.782292
hsa-mir-4675	0	0	0.286513	0	0	0	0	0	0	0	0	0	0	0	0	0	0	0	0	0.473115	0	0	0	0	0	0	0	0	0	0	0	0	0	0	0	0	0	0	0	0	0.219786	0	0	0	0	0	0	0	0
hsa-mir-4676	0.943099	1.36858	1.94709	1.45141	0.273647	0.620465	0.126884	1.13635	1.72323	0	0	0.367374	0	0.751135	1.20754	0.870418	0.497633	1.7794	1.06313	1.11391	1.38336	1.15673	0	0	1.32947	1.93461	0	0.863107	1.08125	1.16586	0.406994	0.627385	1.01984	1.74961	0.869361	0.84909	1.21442	0.733401	0.907669	0.25937	0	1.04907	1.4778	1.57754	0.485863	0.41047	0.89933	0.720654	1.86374
hsa-mir-4677	4.03365	3.15555	4.56242	5.11496	3.51639	3.02944	2.57177	2.99815	1.95501	3.64236	1.85868	2.254	3.13155	2.83755	4.06292	1.91098	3.2705	3.9632	3.63684	1.89403	3.04254	3.66453	2.7741	4.62593	3.22065	2.87797	3.36699	1.60757	2.44982	2.10985	2.77959	1.39741	2.8412	3.89855	2.45022	1.92781	4.09037	1.86798	3.97425	1.70708	1.98626	2.78252	3.84693	1.86637	1.76661	1.57275	2.33274	2.77217	3.98888
hsa-mir-4678	0	0	0	0	0	0	0	0	0	0	0	0	0	0	0	0	0	0	0	0	0	0	0	0	0	0	0	0	0	0	0	0	0	0	0	0.263444	0	0.221121	0	0	0	0	0	0	0	0	0.365581	0	0
hsa-mir-4679-1	0	0	0	0	0	0.237715	0.126884	0	0.655751	0	0	0	0	0	0	0	0	0	0	0	0	0	0	0	0	0	0	0.495159	0	0	0	0	0	0	0.41223	0.263444	0	0.221121	0	0	0	0	0	0	0	0	0	0	0
hsa-mir-4679-2	0	0	0	0	0	0	0	0	0	0	0	0	0	0	0	0	0	0	0	0	0	0	0	0	0	0	0	0	0	0	0	0	0	0	0.220789	0	0	0	0	0.135506	0	0	0	0	0.263288	0	0	0	0
hsa-mir-4680	0	0.538086	0.525446	0.760351	0	0	0.229065	0.262681	0.655751	0	0	0	0	0	0.726588	0.351701	0	0	0	0.473115	0	0	0	0	0	0.770352	0	0	0.290631	0	0.406994	0	0	0.336305	0	0	0	0	0.232909	0.135506	0	0.341756	0	0.412258	0	0	0.194339	0.282115	0.310287
hsa-mir-4681	0	0	0	0	0	0	0	0	0	0	0	0	0	0	0	0	0	0	0	0	0	0	0	0	0	0	0	0	0	0	0.406994	0	0	0	0	0	0	0.221121	0	0	0	0	0	0	0	0	0	0	0
hsa-mir-4682	0	0	0	0	0	0	0	0	0	0	0	0	0	0	0	0	0	0	0	0	0	0	0	0	0	0	0	0	0	0	0	0	0	0.336305	0	0	0	0	0	0	0	0	0	0	0	0	0	0	0
hsa-mir-4683	0.386867	0	0.730372	0.429697	0.273647	0.237715	0.324485	0.677277	0.655751	0	0	0	0.675559	0	0	0.870418	0	0	0	0	0	0	0	0	0.462865	0.770352	0	0	0.290631	0.500352	0	0	0.59822	0.336305	0.220789	0	0.249311	0.221121	0.232909	0.135506	0.578873	0	0.290608	0.732515	0	0	0	0	0.565507
hsa-mir-4684	0	0.538086	0	0	0	0.620465	0.111221	0	0	0	0	0	0	0	0	0	0	0.856743	0	0	2.32823	1.50806	0	0.578763	2.25784	0.770352	0	0	0.290631	0	0	0	1.34571	0.336305	0	0.486129	0.46182	0	0.232909	0	0	0.341756	0	0	0	0.114074	0	0.720654	1.54579
hsa-mir-4685	0.943099	0	0.286513	0	0	0.237715	0.413983	0	0	0.712084	0	0	0.675559	0	0	0	0	0	0	0.473115	0	0	0	0.578763	0	1.26985	0	0	0.290631	0.500352	0	0	0.59822	0	0.869361	0.486129	1.21442	0.412811	0.907669	0.135506	0	0.341756	0.532378	1.21603	0	0	1.00676	0.720654	0.782292
hsa-mir-4686	0	0	0	0	0	0	0	0	0	0	0	0	0	0	0	0	0	0	0	0	0	0	0	0	0	0	0	0	0	0	0.406994	0	0	0	0	0	0	0	0	0	0	0	0	0	0	0	0	0	0
hsa-mir-4687	0	0.293986	0	0.429697	0.273647	0.237715	0.126884	0.484822	0	0	0	0	0	0	0	0	0	0	0.627355	0	0.851499	0	0	0	0.462865	0	0.885202	0	0	0	0	0.627385	0	0.336305	0.220789	0	0.647008	0	0	0.135506	0	0	0.290608	0	0	0	0	0.282115	0.310287
hsa-mir-4688	0	0	0	0	0	0	0	0	0	0	0	0	0	0	0	0	0	0	0	0	0	0	0	0	0	0	0	0	0	0	0	0	0	0	0	0	0	0	0	0	0	0	0	0	0	0	0	0	0
hsa-mir-4689	0.386867	0	0	0.429697	0	0	0	0	0	0	0	0	0	0	0	0	0	0	0	0	0	0	0	0	0	0	0	0	0	0	0.406994	0	0	0	0	0	0	0	0	0	0	0	0	0	0	0	0	0	0
hsa-mir-4690	0.386867	0.293986	0.286513	0.429697	0	0	0	0	0	0	0	0	0	0	0.726588	0	0	0	0	0.473115	0	0.691319	0	0	0	0	0	0.495159	0	0	0	0	0.59822	0	0.220789	0	0	0	0.232909	0	0.219786	0.617859	0.290608	0.412258	0	0	0.365581	0	0
hsa-mir-4691	0.386867	0.293986	0	0.429697	0.273647	0	0	0	0	0	0	0	0	0	0	0.351701	0	0	0	0	0	0	0	0	0	0	0	0	0	0.500352	0	0	0	0	0	0	0	0	0	0	0	0	0	0	0	0	0	0	0
hsa-mir-4692	0.386867	0	0	0	0	0	0	0	0	0	0	0	0	0	0	0	0	0	0	0	0	0	0	0	0	0	0	0	0	0	0	0	0	0.608844	0	0	0	0	0	0	0	0	0	0	0	0	0	0	0
hsa-mir-4693	0	0	0	0	0	0	0	0	0	0	0	0	0	0	0	0	0	0	0	0	0	0	0	0	0	0	0	0	0	0	0	0	0	0	0	0	0	0	0	0	0	0	0	0	0	0	0	0	0
hsa-mir-4694	0	0	0	0	0	0	0	0	0	0	0	0	0	0	0	0	0	0	0	0	0	0	0	0	0	0	0	0	0	0	0	0	0	0	0	0	0	0	0	0	0	0	0	0	0	0	0	0	0
hsa-mir-4695	0	0	0	0	0	0	0	0	0	0	0	0	0	0	0	0	0	0	0	0	0	0	0	0	0	0	0	0	0	0	0	0	0	0	0	0	0	0.221121	0	0	0	0	0	0.412258	0	0	0	0	0
hsa-mir-4696	0	0.293986	0	0	0	0	0	0	0	0	0	0	0	0	0	0	0	0	0	0	0	0	0	0	0	0	0	0	0	0.871148	0	0	0	0	0	0	0	0	0	0	0.729655	0	0	0	0	0	0	0	0
hsa-mir-4697	0	0	0	0	0	0	0.126884	0.262681	0	0	0	0	0	0	0	0	0	0	0	0	0	0	0	0	0	0	0	0	0	0	0	0	0	0.336305	0	0.263444	0	0	0	0	0	0	0	0.412258	0	0	0	0	0
hsa-mir-4698	0	0	0	0	0	0	0	0	0	0	0	0	0	0	0	0	0	0	0	0	0	0	0	0	0	0	0	0	0	0	0	0	0	0	0	0	0	0	0	0	0	0	0	0	0	0	0	0	0
hsa-mir-4699	0.386867	0	0	0	0	0	0	0	0	0	0	0	0	0	0	0	0	0	0	0	0	0	0	0	0	0	0	0	0.290631	0	0	0	0	0	0	0	0	0	0.232909	0	0	0	0	0	0	0	0	0	0
hsa-mir-4700	0	0.293986	0	0	0.273647	0	0.338005	0	0	0	0	0	0	0.751135	0	0	0.497633	0	0.627355	0	0	0	0	0	0	0	0	0.495159	0	0	0	0	0	0	0	0.678994	0.46182	0.221121	0.232909	0	0.219786	0.341756	0	0	0	0	0	0	0.565507
hsa-mir-4701	0.386867	0	0	0	0.273647	0.237715	0	0	0.655751	0	0	0	0	0	0	0	0.497633	0	0	0	0	0	0	0.578763	0.462865	0	0	0	0.290631	0	0	0	0	0	0	0	0.46182	0.221121	0.232909	0	0	0	0	0	0	0	0.194339	0	0
hsa-mir-4703	0	0	0	0	0	0	0.111221	0	0	0	0	0	0	0	0	0	0	0	0	0	0	0	0	0	0	0	0	0	0	0	0	0	0	0	0	0	0	0	0	0	0	0	0	0	0	0	0	0	0
hsa-mir-4704	0	0	0	0	0	0	0	0	0	0	0	0	0	0	0	0	0	0	0	0	0	0	0	0	0	2.73237	0	0	0	0	0	0	0	0	0	0	0	0	0	0	0	0	0.290608	0	0	0	0	0	0
hsa-mir-4705	0	0.293986	0	0	0	0	0	0	0	0	0	0	0	0	0	0.351701	0.497633	0	0	0	0	0	0	0	0	0	0	0	0	0	0	0.627385	0	0	0	0	0	0.221121	0	0	0	0	0	0	0	0.114074	0.783247	0	0
hsa-mir-4706	0	0	0	0	0	0	0	0	0	0	0	0	0	0	0	0	0	0.856743	0	0	0	0	0	0	0	0	0	0	0	0	0	0	0	0	0	0	0.249311	0	0	0	0	0	0	0	0	0	0.194339	0	0
hsa-mir-4707	0	0.293986	0	1.02917	0	0.237715	0	0	0	0	0.459696	0	0	0	0	0.634248	0	0	0	0	0.851499	0.691319	0	0.578763	0	0.770352	0.885202	0	0.290631	0	0.983867	0.627385	0	0.608844	0.41223	0.263444	0	0	1.15472	0.135506	0.578873	0.849514	0.290608	0	0	0	0	0	0.970717
hsa-mir-4708	0	0	0.286513	0	0	0.441747	0	0	0	0.712084	0	0	0	0.751135	0	0	0	0.856743	0	0	0	0	0	0	0	0	0	0	0	0	0	0	0.59822	0.837988	0.220789	0	0	0	0.433392	0	0	0	0	0	0	0	0	0.282115	0.310287
hsa-mir-4709	0.691626	0.538086	0.525446	1.62373	0.273647	0.922669	0.611659	0.262681	1.44695	1.18672	0.459696	0.659931	1.13385	0.751135	0.726588	0.870418	0	0	1.66854	1.11391	1.38336	0	0.572121	1.31075	0.812745	0.770352	0.885202	0.863107	1.22592	0	0	1.06317	0.59822	1.63234	1.86629	0	0	0.412811	1.26401	0.669814	1.4036	0	0.532378	0.412258	0.485863	0.99085	0.365581	0.898329	0.565507
hsa-mir-4710	0.386867	0	0	0.760351	0	0	0	0	0.655751	0	0	0	0	0	0	0	0	0	0	0	0	0	0	0	0	0	0	0	0	0	0	0	0	0	0	0	0	0	0	0	0	0	0	0	0	0.219784	0	0	0
hsa-mir-4711	0	0	0	0	0	0	0	0	0	0	0	0	0	0	0	0	0	0	0	0	0	0	0	0	0	0	0	0	0	0	0	0	0	0	0	0	0	0	0	0	0	0	0	0	0	0	0	0	0
hsa-mir-4712	0	0	0	0	0	0	0	0	0	0	0	0	0	0	0	0	0	0	0	0.473115	0	0	0	0	0.462865	0	0	0	0	0	0	0	0	0	0	0	0	0	0	0	0	0	0	0	0	0	0	0	0
hsa-mir-4713	0.386867	0	1.06932	0	0	0.237715	0	0.262681	0	0	0	0	0	0	0	0	0	0.856743	0	0	0	0	0	0	0	0	0	0	0	0	0.983867	0	0.59822	0.336305	0	0	0	0	0	0	0	0	0.532378	0	0.263288	0	0	0.282115	0.310287
hsa-mir-4714	0	0.293986	0.525446	1.91671	0.273647	0.922669	0	0	0	0.712084	0.459696	0	0	0	0	0.351701	0	0	0	0	0	0.691319	0	0	0.462865	0	0	0	0.532417	0.500352	0	0	0.59822	0	0.220789	0	0.249311	0.412811	0	0	0.219786	0	0.290608	0	0	0	0.194339	0.282115	0
hsa-mir-4715	0	0	0	0	0	0	0	0	0	0	0	0	0	0	0	0	0	0	0	0	0	0	0	0	0	0	0	0	0.290631	0	0	0	0	0	0	0	0.249311	0.221121	0	0	0	0.341756	0.290608	0	0	0	0	0	0
hsa-mir-4716	0	0	0.286513	0	0	0	0	0	0	0	0	0	0	0.751135	0	0	0	0	0.627355	0	0	0	0	0	0	0	0	0	0	0	0	0	0	0.336305	0	0	0	0	0.232909	0	0	0	0	0	0	0	0	0	0.310287
hsa-mir-4717	0	0	0	0.429697	0	0	0	0	0	0	0	0	0	0	0	0	0	0	0	0	0	0	0	0	0.462865	0.770352	0	0	0	0.500352	0	0	0	0.336305	0	0.263444	0	0	0	0	0	0.341756	0	0	0	0	0	0.282115	0
hsa-mir-4718	0	0	0	0	0	0	0	0	0.655751	0	0	0	0	0	0	0	0	0	0	0	0	0	0	0	0	0	0	0	0	0	0	0	0	0	0	0	0	0	0	0	0	0	0	0	0	0	0	0	0
hsa-mir-4719	0	0	0	0	0	0	0	0	0	0	0	0	0	0	0	0	0	0	0	0	0	0	0	0	0	0	0	0	0	0	0	0	0	0	0	0	0	0	0	0	0	0	0	0	0	0	0	0	0
hsa-mir-4720	0	0	0	0	0	0	0	0	0	0	0	0	0	0	1.20754	0	0	0	0	0	0	0	0	0	0	0	0	0.495159	0	0	0	0	0	0	0	0	0	0	0	0	0	0	0	0	0	0	0	0	0
hsa-mir-4721	0	0	0	0	0	0	0	0	0	0	0	0	0	0	0	0	0	0	0	0	0	0	0	0	0	0	0	0	0	0	0	0	0	0	0	0	0	0	0	0	0	0	0	0	0	0	0	0	0
hsa-mir-4722	0	0.293986	0	0	0	0	0	0	0	0	0	0	0	0	0	0	0	0	0	0	0	0	0	0	0	0	0	0	0	0	0	0	0	0	0	0	0	0	0	0	0	0	0	0	0	0	0	0	0
hsa-mir-4723	0	0	0	0	0.273647	0	0.111221	0	0	0	0	0	0	0	0	0	0	0	0	0	0	0	0	0	0	0	0.885202	0	0.290631	0	0	0	0	0	0	0	0.249311	0	0.433392	0	0	0	0	0	0.263288	0	0.194339	0.282115	0
hsa-mir-4724	1.15718	0.538086	2.24328	1.45141	0	0.441747	0.426694	0	1.10492	1.54325	0.807771	0.659931	0	1.24259	0.726588	0	1.16072	0	1.66854	0.828799	2.32823	2.22914	0.572121	0.990691	2.56501	1.26985	1.42977	0	1.47788	0.500352	0.724074	1.06317	3.20501	1.50469	0	0.263444	1.70649	0.581993	0.232909	0.479139	0	1.04907	0.920387	2.65358	0	0	0	1.65982	1.13735
hsa-mir-4725	0	0	0	0	0	0	0	0	0	0	0	0	0	0	0	0.351701	0	0	0.627355	0	0	0	0	0	0	0	0	0	0	0	0	0	0	0	0	0	0	0	0	0	0	0	0	0	0	0	0	0	0
hsa-mir-4726	0.386867	0.293986	0.730372	0	0	0.237715	0.229065	0	0	0	0	0	0	0.751135	0.726588	0	0.86694	0	0.627355	0	0	0	0	0	0	0	0	0.495159	0.290631	0	0.724074	0	0	0.608844	0.581218	0.263444	0	0	0.433392	0.135506	0.410474	0	0	0	0	0	0	1.0565	0.565507
hsa-mir-4727	0	0.293986	0	0	0	0	0.126884	0	0	0	0	0	0	0	0	0	0	0.856743	0	0.473115	0	0	0	0	0	1.26985	0.885202	0	0	0.500352	0.406994	0.627385	0	0	0.220789	0.263444	0.249311	0.412811	0	0.25937	0	0	0	0.412258	0	0	0	0.282115	0
hsa-mir-4728	2.40755	0.293986	2.48889	0.429697	1.29984	1.73492	0.685409	1.99841	0.655751	1.18672	0	0.903046	0	0.751135	0.726588	0.870418	0.497633	1.39061	1.66854	0.473115	0.851499	1.15673	0	4.8646	0.812745	1.26985	0.885202	1.78946	1.08125	1.41047	3.33996	0	1.01984	1.74961	1.10942	0.84909	1.21442	0.412811	1.15472	0.669814	0.578873	0.849514	0.739388	1.72917	0	0.114074	1.20025	1.65982	0.970717
hsa-mir-4729	0	0	0	0	0	0	0	0	0	0	0	0	0	0	0	0	0	0	0	0	0	0	0	0	0	0	0	0	0	0	0.406994	0	0	0	0	0	0	0.221121	0.232909	0	0	0	0	0	0	0	0	0.282115	0
hsa-mir-4730	0	0	0	0	0	0	0	0	0	0	0	0	0	0.751135	0	0	0.497633	0	0	0	0	0	0	0	0	0	0	0	0	0	0	0	0	0	0	0	0	0	0	0	0	0	0	0	0	0.114074	0	0	0
hsa-mir-4731	0	0	0	0.429697	0	0	0.111221	0	0	0	0	0	0	0	0	0	0	0	0	0	0	0	0	0	0	0	0	0	0	0	0	0	0	0	0	0	0	0.221121	0	0.135506	0	0.341756	0	0	0	0	0	0.282115	0
hsa-mir-4732	0.943099	0	1.57396	0	0	0	0	0	0	0.712084	0	0.367374	0.675559	0	0	0	0	0.856743	1.06313	0.473115	0	1.15673	0	0.578763	0	0	0	0.863107	0	0	0	0	0	0	0.41223	0.486129	0.249311	0.581993	0	0	0.729655	0.617859	0	0.994435	0	0	0.89933	0	0
hsa-mir-4733	0.691626	0	0	0	0.273647	0.620465	0.243505	0.262681	0	0	0	0	0.675559	0	0	0	0.497633	0	0	0	0	0.691319	0.572121	0.990691	0	0	0	0	0	0	0.406994	0	0	0	0.220789	0.263444	0.46182	0	0	0.135506	0.219786	0	0	0	0	0.114074	0	0.282115	0
hsa-mir-4734	0	0	0.286513	1.45141	0	0	0	0	0.655751	0	0	0	0	0	0	0	0	0	0	0	0	0	0	0	0	0	0	0	0	0	0	0	0	0	0	0	0	0	0.433392	0	0	0	0	0	0	0	0	0	0
hsa-mir-4735	0	0	0	0	0	0.237715	0	0	0	0	0	0	0	0.751135	0	0	0	0	0	0	0	0	0	0	0	0	0	0	0	0	0	0	0	0	0	0	0	0	0	0	0	0.341756	0	0	0	0	0	0	0
hsa-mir-4736	0	0.293986	0	0	0	0	0.126884	0	0	0	0	0	0	0	0	0	0	0	0	0.473115	0	0	0	0	0	0.770352	0	0	0	0	0.406994	0	0	0	0.220789	0.263444	0.811106	0	0.232909	0.373436	0.219786	0.341756	0.290608	0.412258	0.485863	0	0	0.898329	0
hsa-mir-4737	0	0	0	0	0	0	0	0	0	0	0	0	0	0	0	0	0	0	0	0	0	0	0	0	0	0	0	0	0	0	0	0	0	0	0	0	0	0	0	0	0	0	0	0	0	0	0	0	0
hsa-mir-4738	0	0	0.286513	1.02917	0	0	0.126884	0	0	0	0.459696	0	0.675559	0.751135	0	0	0	0	0	0	0	0	0.572121	0.578763	0	0.770352	0	0	0.290631	0	0.983867	0.627385	0.59822	1.03568	0.581218	0.263444	0.46182	0	0.232909	0.25937	0.219786	0	0.532378	0.412258	0	0	0	0.282115	0
hsa-mir-4739	0	0	0.730372	0.760351	0	0.237715	0.611659	0.484822	0	0	0	0	0	0	0.726588	0	0.86694	0	0	0	0	0	0	0.578763	0.812745	0	0	0	0	0	0.983867	0	0	0	0.220789	0	0.647008	0.221121	0	0	0.219786	0.341756	0.290608	0.412258	0	0	0.365581	0	0.565507
hsa-mir-4740	0	0	0	0	0.273647	0.237715	0.126884	0	0	0.712084	0.459696	0	0	0	0	0	0	0	0	0	0	0	0	0	0	0	0	0	0.290631	0	0	0	0	0	0.220789	0	0	0	0	0.135506	0	0	0	0	0.263288	0	0	0.282115	0
hsa-mir-4741	0.691626	0	0.909778	1.02917	0	0	0	0	0	0	0	0	0.675559	0	0.726588	0.351701	0	0	0	0	0	0.691319	0.572121	0	0.462865	0	0	0	0.290631	0	0	0	1.01984	0.336305	0.581218	0	0.249311	0	0.907669	0.135506	0.410474	0	0.739388	0.412258	0	0	0	0.282115	0
hsa-mir-4742	1.34355	1.09093	0.730372	1.02917	0.701841	0.441747	0.3514	0.847055	0	0	0	0	0.675559	0.751135	0	0.351701	0	1.39061	2.26697	0.828799	0	0.691319	0	1.57254	1.32947	1.64018	1.42977	0.863107	0	1.16586	1.20394	1.06317	0	0.837988	0.99438	0.486129	0.249311	0.412811	0.433392	0.135506	0.219786	0.617859	0.739388	0.994435	0	0.41047	0.194339	0.898329	0.782292
hsa-mir-4743	0	0	0	0	0	0	0	0	0	0.712084	0	0	0	0	0	0	0	0.856743	0	0	0	0	0	0	0	0.770352	0	0	0.290631	0	0	0	0	0	0	0	0	0	0	0	0	0	0	0	0	0	0.194339	0	0
hsa-mir-4744	0	0	0	0	0.273647	0	0.126884	0	0	0	0	0	0	0	0	0	0	0	0	0	0	0	0	0	0	0	0	0	0	0	0	0	0	0	0.41223	0	0	0	0	0	0	0	0	0	0	0	0	0.282115	0
hsa-mir-4745	0.386867	0	0.730372	0.760351	0	0	0.338005	0.262681	0.655751	0.712084	0	0	0	0	0	0.351701	0	0.856743	0	0	0	0	0	0	0.462865	1.64018	0	0	0.532417	0.500352	0.406994	0	0	1.03568	0	0.263444	0.811106	0.412811	0	0.25937	0.219786	0.617859	1.69223	0	0	0	0	0	0.782292
hsa-mir-4746	3.26475	0.929102	2.54428	2.36833	1.97234	1.1724	1.56734	1.13635	1.72323	1.82891	1.52419	0.367374	1.48111	1.24259	3.03596	0.870418	1.40467	2.33763	2.42165	0.828799	1.38336	2.22914	0	2.68465	1.70914	1.93461	2.60458	0.495159	0.739437	0	1.39484	0.627385	1.83562	2.37859	1.49522	1.26447	1.6206	0.870418	2.90352	1.83205	0.990857	0.617859	2.04411	1.57754	0.485863	0.729651	0.657	1.92892	1.28672
hsa-mir-4747	0.386867	0	0.286513	0.760351	0	0	0	0	0	0	0	0	0	0	0	0	0.497633	0	0.627355	0	0	0.691319	0	0	0	0	0	0	0	0	0	0	0	0.336305	0	0	0	0	0.232909	0	0	0	0	0	0	0	0	0	0
hsa-mir-4748	0.386867	0	0	0.760351	0	0	0	0	0	0.712084	0	0	0	0.751135	0	0	0	0	0	0	0	0	0	0	0	0	0	0	0	0.500352	0	0	0	0.608844	0.220789	0	0	0	0	0	0	0	0	0	0	0	0	0	0.310287
hsa-mir-4749	0	0	0	0	0	0	0	0	0	0	0	0	0	0	0	0.351701	0	0	0	0	0	0	0	0	0.462865	0	0.885202	0	0	0	0	0	0	0	0	0	0	0	0.232909	0	0.219786	0	0.532378	0.412258	0	0	0	0	0.310287
hsa-mir-4750	0.691626	0	0	0	0	0	0	0	0	0	0	0	0	0	0	0	0	0	0	0	0	0	0	0	0	0	0	0	0	0	0	0	0	0.336305	0	0	0	0	0	0	0	0	0	0	0	0	0	0	0
hsa-mir-4751	0	0	0	0	0	0	0	0	0	0	0	0	0	0	0	0	0	0	0	0	0	0	0	0	0	0	0	0	0	0	0	0	0	0	0	0	0	0	0	0	0	0	0	0	0	0	0	0	0
hsa-mir-4752	0	0	0	0	0	0	0.229065	0	0	0.712084	0	0	0	0	0	0	0.497633	0	0	0	0.851499	0	0	0	0	0	0	0.495159	0	0	0.983867	0	0	0	0	0	0	0	0	0	0	0	0	0	0	0	0	0.282115	0
hsa-mir-4753	0	0.293986	0	0	0	0	0.338005	0	0	0	0	0	0	0	0	0	0	0	0.627355	0.473115	0	0	0	0.990691	0	0.770352	0	0	0	0	0.406994	0	0.59822	0.608844	0.732472	0.263444	0.249311	0	0.433392	0	0	0	0.532378	0	0	0.219784	0	0	0
hsa-mir-4754	0	0	0.286513	0	0.273647	0.237715	0	0	0	0	0	0	0	0	0	0	0	0	0	0	0	0	0	0	0	0	0	0	0	0.500352	0	0	0	0	0	0	0	0.221121	0.609383	0	0	0.341756	0	0	0	0.114074	0	0	0
hsa-mir-4755	0.386867	0.293986	0.286513	0	0	0	0.126884	0	0	0	0.459696	0	0	0	0	0	0	0	0	0	0	0	0	0	0	0.770352	0	0	0	0	0.406994	0	0	0.336305	0	0.678994	0.249311	0	0.232909	0	0	0.341756	0.739388	0.412258	0	0.318275	0.194339	0.282115	0.782292
hsa-mir-4756	0	0.293986	0.286513	0.429697	0	0.441747	0	1.2618	0	0.712084	0	0	0.675559	0	0	0.351701	0	1.39061	0	0	0	1.50806	0	0.990691	0.812745	0	0	1.60757	0.532417	0	0	0	0	0.336305	0.220789	0.678994	0.958431	0.221121	0	0	0	0.849514	0	0.994435	0	0.114074	0.365581	0	0
hsa-mir-4757	0	0	0.525446	0	0	0	0	0.262681	0	0.712084	0.459696	0	0	0	0	0	0	0	0	0	0	0	0	0.578763	0	0	0	0	0	0	0	0	0	0	0	0	0.249311	0	0	0.135506	0.410474	0	0	0	0	0.114074	0.194339	0.282115	0
hsa-mir-4758	0.386867	0	0.909778	0	0	0	0.126884	0	0	0.712084	0.459696	0	0	0	0	0.351701	0	0	0	0	0	0	0	0	0.462865	0.770352	0	0	0.290631	0	1.20394	0	0	0	0.220789	0	0.958431	0	0	0	0	0	0	0	0	0	0.194339	0	0.310287
hsa-mir-4759	0	0	0	0	0	0	0	0	0	0	0	0	0	0	0	0.351701	0	0	0	0	0	0	0	0	0	0	0	0	0	0	0	0	0	0	0	0	0	0	0	0	0	0	0	0	0	0	0	0	0
hsa-mir-4760	0	0	0	0	0	0	0	0	0	0	0	0	0	0	0	0	0	0	0	0	0	0	0	0	0	0	0	0	0	0	0	0	0	0	0	0	0.249311	0	0	0	0	0	0	0	0	0	0	0	0
hsa-mir-4761	0	0	0	0	0	0	0	0	0	0	0	0	0	0	0	0	0	0	0	0	0	0	0	0	0	0	0	0	0	0	0.406994	0	0	0	0	0	0	0	0	0	0	0	0.290608	0	0	0	0	0	0
hsa-mir-4762	0	0	0.525446	0.429697	0.273647	0.441747	0.111221	0.262681	0.655751	0	0	0	0.675559	0	0	0	0.497633	0	0	0.473115	0	0.691319	0	0	0	0.770352	0.885202	0	0	0	0	0	1.01984	0	0.220789	0	0.811106	0.733401	0.232909	0	0.219786	0.341756	0.290608	0.412258	0.263288	0.318275	0	0	1.28672
hsa-mir-4763	0	0	0.525446	0.429697	0.273647	0.922669	0	0.677277	0	0	0	0	0	0	0	0	0	0	0	0	0	0	0	0	0	0	0	0	0	0	0	0	0.59822	0.837988	0	0	0.249311	0	0.232909	0	0	0	0.290608	0	0	0	0	0	0.310287
hsa-mir-4764	0	0	0	0	0.273647	0	0	0	0	0	0	0	0	0	0	0	0	0	0	0	0	0	0	0	0.462865	0	0	0	0	0	0	0	0	0	0	0	0	0	0	0	0	0	0	0	0	0	0	0	0
hsa-mir-4765	0	0	0	0	0	0	0	0	0	0	0	0	0	0	0	0	0	0	0	0	0	0	0	0	0	0	0	0	0	0	0	0	0	0.336305	0	0	0	0	0	0	0	0	0	0	0	0	0	0	0
hsa-mir-4766	0	0.538086	0.525446	1.91671	0.503572	0	0.111221	0.262681	0	1.18672	0	0	0.675559	0	0.726588	0.351701	0.497633	0	0	0	0	1.15673	0	0.990691	1.32947	0.770352	0.885202	1.15603	0.739437	0.871148	1.39484	0.627385	0.59822	1.20951	0.869361	0.263444	0.46182	0	1.36559	0.25937	0	1.22434	1.22585	1.21603	0	0	0.194339	0.720654	0.565507
hsa-mir-4767	0	0	0	0	0	0	0	0	0	0	0	0	0	0	0	0	0	0	0	0	0	0.691319	0	0	0	0	0	0	0	0	0	0	0	0	0	0	0	0	0	0	0	0	0	0	0	0	0	0.282115	0
hsa-mir-4768	0	0	0	0.429697	0.876125	0	0.338005	0.262681	0	0	0	0.367374	0	0	0	0	0	0	0	0.473115	0	0.691319	0	0	0	0	0	0	0.290631	0	0	0	0	0.336305	0	0	0.46182	0	1.03648	0	0	0	0.290608	0	0	0.114074	0.194339	0.720654	0
hsa-mir-4769	0	0.293986	0	0	0	0	0	0	0	0	0	0	0	0	0	0	0	0	0	0	0	0	0	0	0	0	0	0	0	0	0	0	0	0	0	0.263444	0	0	0	0	0	0	0	0	0	0	0	0	0
hsa-mir-4770	0	0	0	0	0	0	0.111221	0	0	0	0	0.659931	0	0.751135	0	0	0	0.856743	0	0	0	0	0	0	0.812745	0	0	0	0	0.871148	0.406994	0	0	0	0	0.263444	0	0.412811	0.232909	0.135506	0.866159	0	0	0	0	0	0.365581	0.282115	0
hsa-mir-4771-1	0	0	0	0	0	0	0	0	0	0	0	0	0.675559	0	0	0	0	0	0	0	0	0	0	0	0.812745	0.770352	0	0.495159	0	0.500352	0	0	0	0	0.220789	0	0	0	0	0.135506	0	0	0	0	0	0.114074	0	0	0
hsa-mir-4771-2	0	0	0	0	0	0	0	0	1.10492	0	0	0	0	0	0	0	0	0	0	0	0	0	0	0.578763	0	0	0.885202	0.495159	0	0	0.406994	0	0	0	0	0	0	0	0	0	0	0.341756	0.290608	0	0	0.114074	0	0	0
hsa-mir-4772	2.3214	3.5667	4.76251	5.43723	2.6849	2.19613	4.17484	1.37721	2.33	2.7535	3.02322	2.76555	3.93858	3.73293	5.64686	3.59007	3.78332	3.62682	3.01462	2.7701	2.89433	3.79804	0	3.50652	3.43765	4.64347	3.48082	1.39939	2.6166	2.85168	2.55797	4.79147	3.12229	3.49034	4.10487	3.56296	4.96265	3.72871	3.56834	2.86841	3.15363	3.94805	3.24487	3.57474	2.26424	2.25848	3.47171	3.1685	4.31877
hsa-mir-4773-1	0	0	0	1.25569	0	0	0	0	1.10492	0	0	0	0	0	0	0	0	0	0	0	0	0	0	0	0	0	0	0	0.290631	0	0	0.627385	0	0	0.581218	0	0.249311	0	0	0.135506	0	0	0	0	0	0.114074	0	0	0.565507
hsa-mir-4773-2	0	0	0.525446	1.45141	0.273647	0.237715	0	0	0	0.712084	0	0	0	0	0	0	0	0	0	0	0.851499	0	0	0	0	0	0.885202	0	0	0	0	0	0	0	0	0	0	0	0	0	0	0	0	0	0	0.318275	0	0	0.310287
hsa-mir-4774	0	0	0	0	0	0	0	0	0	0	0	0	0	0	0	0	0	0	0	0	0	0	0	0	0	0	0	0	0	0	0	0	0	0	0	0	0	0	0	0	0	0	0	0	0	0	0	0	0
hsa-mir-4775	0	0	0	0	0.503572	0	0.111221	0.262681	0	0	0	0	0	0	0	0	0	0	0	0	0	0	0	0	0	0	0	0	0.290631	0	0	0	0	0	0	0	0.249311	0	0.232909	0.25937	0	0	0.290608	0.732515	0	0.41047	0	0	0
hsa-mir-4776-1	0	0	0	0	0	0	0	0	0	0	0	0	0	0	0.726588	0	0	0	0	0.473115	0	0	0	0	0	0	0	0	0	0	0	0	0	0	0	0	0	0	0	0	0	0	0	0	0	0	0	0	0
hsa-mir-4776-2	0	0	0	0	0	0	0	0	0	0	0	0	0	0	0	0	0	0	0	0	0	0	0	0	0	0	0	0	0	0	0	0	0	0	0	0	0	0	0	0	0	0	0	0	0	0	0	0	0
hsa-mir-4777	0	0.293986	0	0	0.876125	0.441747	0.812828	0.677277	0	0	0.459696	0	1.7608	0	0.726588	0.351701	0.497633	2.08535	0	0.473115	0	0.691319	0	0	0.462865	0	0	0	1.22592	0	0	0	0	0	0.869361	0.263444	0.46182	0.221121	0.609383	0.669814	0.219786	0	0.290608	0	0	0.41047	0	0.517984	0.970717
hsa-mir-4778	0.386867	0	0	0	0	0	0	0	0	0.712084	0	0	0	0	0	0	0	0	0	0	0	0	0	0	0	0	0	0	0	0	1.20394	0	0	0	0	0	0.249311	0	0	0.135506	0	0	0.290608	0	0	0	0	0.282115	0
hsa-mir-4779	0	0	0	0	0	0	0	0	0	0	0	0	0	0	0	0	0	0	0	0	0	0	0	0	0	0	0	0	0	0	0	0	0	0	0	0	0	0	0	0	0.219786	0	0	0	0	0	0	0	0.310287
hsa-mir-4780	0	0	0	0.429697	0	0.620465	0	0.262681	0	0	0	0.367374	0.675559	1.24259	0	0	0	0	0.627355	0	0	0	0	0.578763	0	0	0	0	0	0	0	0	1.01984	0	0	0	0	0.412811	0	0	0	0	0	0.732515	0	0.114074	0	0	0
hsa-mir-4781	0.943099	0.293986	0.525446	0.760351	0	0.441747	0.229065	0.262681	1.10492	0	0	0.659931	1.48111	0	0	0.634248	0	0	0	0	0	0	0.572121	0.578763	0	0	0	0	0	0.500352	0	0	0	0.336305	0	0.263444	0.249311	0.412811	0	0.135506	0	0	0	0	0.263288	0.114074	0.365581	0.720654	0.782292
hsa-mir-4782	0	0	0	0	0	0	0	0	0	1.18672	0	0.367374	0	0	0	0	0	0.856743	0	0	0	1.15673	0	0	0.462865	0	0.885202	0	0.290631	0	0	0	0	0	0	0	0.249311	0	0	0	0	0.341756	0.532378	0	0	0	0.194339	0.282115	0.310287
hsa-mir-4783	0	0	0	0	0	0	0	0	0	0	0	0	0	0	0	0	0	0	0	0	0	0	0	0	0	0	0	0	0	0	0	0	0	0	0	0.263444	0	0	0	0	0	0	0	0	0	0	0	0	0
hsa-mir-4784	0	0.293986	0.525446	0.429697	0.273647	0	0	0	0	0	0	0	0	0	0.726588	0	0.86694	0	0.627355	0.828799	0.851499	0.691319	0	1.57254	0	1.64018	0	0	0	0	0	0	0	0.608844	0.220789	0	0.46182	0.581993	0.232909	0.479139	0	0.341756	0	0	0	0.219784	0.194339	0.517984	0
hsa-mir-4785	0	0	0.286513	0.429697	0	0	0	0	0	0	0	0	0	0	0	0	0	0.856743	0	0	0	0	0	0.990691	0	0	0	0.495159	0	0	0	0	0	0.336305	0.41223	0	0.46182	0.221121	0.232909	0.25937	0.219786	0	0.290608	0.732515	0	0.114074	0	0	0.565507
hsa-mir-4786	1.79094	0.538086	1.34359	0	0	0.441747	0.510245	0.484822	0.655751	0	0.807771	1.11104	1.7608	0.751135	0	0.634248	1.61328	1.7794	0	0	2.07639	0.691319	0.572121	1.98601	1.86708	1.64018	1.42977	0.495159	0.739437	0.500352	0.983867	0.627385	0.59822	0.336305	0.732472	0.486129	0.46182	0.733401	0.232909	0.577625	0	0.341756	1.08119	0.994435	0.485863	0.578869	0.89933	0.517984	0.782292
hsa-mir-4787	0.943099	0	0.730372	1.02917	0	0.620465	0.324485	0.847055	0	0	0	0	0.675559	0	0	0	0	0	0.627355	0	0	0	0	0	0.462865	0	0.885202	0	0	0	0.406994	0.627385	1.01984	1.50469	0.581218	0.84909	0.46182	0.412811	0.433392	0.25937	0.410474	0.617859	0.739388	0.412258	0	0	0.657	0.898329	1.28672
hsa-mir-4788	1.65666	0	0.730372	0	0	0.237715	0.338005	0.484822	0	0	0	0	0.675559	0	0.726588	0	0	0	0	0.473115	0	2.56513	0	0.578763	2.00942	0	0	2.34901	0.290631	0	0	0.627385	0.59822	0.608844	0.41223	0	0.249311	0	0	0.135506	0.219786	0	1.22585	0.412258	0	0	0	0.898329	0
hsa-mir-4789	0	0	0.525446	0.760351	0	0.237715	0	0	0	0	0	0	0.675559	0	0	0	0	0	0.627355	0	0.851499	0	0	0	0	0	0	0	0	0	0	0	1.01984	0.336305	0	0	0	0	0	0	0.219786	0.341756	0	0	0	0	0	0	0
hsa-mir-4790	0	0	0	0	0	0	0	0	0	0	0	0	0.675559	0	0	0	0	0	0	0	0	0	1.29873	0	0	0	0	0.495159	0.290631	0	0	0	0	0	0	0	1.6206	0	0	0	0	0	0	0	0	0.114074	0.365581	0	0
hsa-mir-4791	0	0.746801	0.909778	1.02917	0.273647	0.441747	0.111221	0	0	0	0	0.659931	0.675559	1.24259	0	0.351701	0.497633	0.856743	0	0.828799	1.38336	2.02637	0.572121	1.57254	1.53176	2.17901	0	1.15603	1.22592	0	0.724074	0.627385	1.83562	1.36464	0.732472	0	0.958431	0	1.03648	0.25937	0.410474	0	1.08119	0.732515	0.485863	0.114074	0.518636	0.898329	0.782292
hsa-mir-4792	0	0	0	0.429697	0	0	0	0	0	0	0	0	0	0.751135	0	0	0	0	0	0	0	0	0	0	0.462865	0.770352	0	0	0	0	0	0	0	0	0.220789	0.263444	0	0.412811	0.232909	0.135506	0.219786	0	0	0	0	0	0.365581	0	0
hsa-mir-4793	0	0	0.286513	0	0	0.237715	0	0.262681	0	0	0	0	0	0.751135	0	0	0	0	0	0	0	0	0	0	0	1.64018	0	0.495159	0	0	0.406994	0	0	0	0	0	0	0	0	0	0	0.341756	0	0	0	0	0	0	0.310287
hsa-mir-4794	0	0	0.286513	0	0	0.237715	0	0	0	0	0	0	0	0	0	0	0	0	0	0	0	0	0	0	0	0	0	0	0	0	0.406994	0	0	0	0	0	0	0	1.71265	0	0	0	0	0	0	0	0	0	0
hsa-mir-4795	0	0	0.525446	0.429697	0	0	0	0	0	0	0	0	0	0.751135	0	0	0	0	0	0	0.851499	0	0.572121	0	0	0.770352	0	0	0	0	0	0.627385	0	0.837988	0.220789	0	0.249311	0.221121	0	0.135506	0	0	0	0	0	0	0	0.517984	0
hsa-mir-4796	0.386867	0	0	0	0	0.620465	0	0.484822	0	0	0.459696	0.367374	0	0	0	0	0	0	0	0	0	0.691319	0	0.578763	0	0	0	0	0	0	0	0	0.59822	0.336305	0.220789	0	0.46182	0.221121	0	0.25937	0	0.341756	0.532378	0.412258	0	0	0.194339	0.282115	0
hsa-mir-4797	0.386867	0	0.286513	1.62373	0.701841	0.922669	0	0.484822	0	0.712084	0	0	0.675559	0	1.20754	0	0	0	1.66854	0	0	1.50806	0	0	0	0.770352	0	0	0.532417	0	1.71433	0	0.59822	0.837988	0.220789	0.486129	0.249311	0	1.15472	0.25937	0.410474	0.341756	0.290608	0.412258	0	0.114074	0.194339	0	0
hsa-mir-4798	0	0	0	0	0	0	0	0.262681	0	0	0	0	0	0	0	0	0	0	0	0	0	0	0	0	0	0	0	0	0	0	0	0	0	0	0	0	0	0	0	0	0	0	0.290608	0	0	0.114074	0	0	0
hsa-mir-4799	0	0	0	0	0	0	0	0	0	0	0	0	0	0.751135	0	0	0	0	0	0	0	0	0	0	0	0	0	0	0	0	0	0	0	0	0	0	0.249311	0	0	0	0	0.341756	0	0	0	0	0	0	0
hsa-mir-4800	0.386867	0	0.286513	0	0.503572	0	0	0	0	0	0	0	0	0	0	0	0	0	0	0.473115	0	0	0	0	0.462865	0	0	0	0.532417	0.871148	0	0	0	0.336305	0.869361	0.263444	0	0	0	0	0.219786	0.341756	0	0	0	0.41047	0.89933	0.517984	0
hsa-mir-4801	0	0	0	0	0	0	0	0	0	0	0	0	0	0	0	0	0	0	0	0	0	0	0	0	0	0	0	0	0	0	0	0	0	0	0	0	0	0	0	0	0	0	0	0	0	0	0	0	0
hsa-mir-4802	0.386867	0	0	0	0.701841	0.237715	0.126884	0	0	0.712084	0	0	1.13385	0	0	0	0.497633	0	1.06313	0	0	0.691319	0.572121	0.578763	0	0	0	0	0.532417	0	0.406994	0	0.59822	0.608844	0.220789	0.263444	0	0	0.232909	0	0.410474	0	0.920387	0.412258	0.263288	0	0.518636	0	0.565507
hsa-mir-4803	0	0	0	0	0	0	0	0	0	0	0	0	0	0	0	0	0	0	0	0	0	0	0	0	0	0	0	0	0	0	0	0	0	0	0	0	0	0	0	0	0	0	0	0	0	0	0	0	0
hsa-mir-4804	0	0	0	0	0	0	0	0	0	0	0	0	0	0	0	0	0	0	0	0	0	0	0	0	0	0	0	0	0	0	0	0	1.01984	0	0	0.486129	0.249311	0	0.232909	0.135506	0.219786	0.341756	0	0	0	0	0.194339	0	0
hsa-mir-483	3.11915	1.09093	3.3543	0.760351	1.52594	1.73492	1.3762	3.16804	2.48633	1.18672	1.32251	1.11104	1.48111	1.90013	1.20754	1.6819	3.0004	0.856743	1.06313	2.16766	1.38336	1.15673	6.57624	2.44417	1.09412	2.87797	2.60458	0.495159	0.739437	1.16586	10.498	2.80578	2.02966	2.51736	0.581218	0.84909	1.21442	0.995543	2.37986	2.2752	2.15568	1.5216	1.69223	0.412258	3.61021	0.929849	1.37083	2.00851	4.19193
hsa-mir-484	7.32474	4.96749	7.05564	6.99198	5.41859	5.96024	5.44904	5.77928	6.11846	5.70192	5.41458	4.28985	5.99339	5.76243	6.88503	5.25809	5.83334	7.32873	5.94169	5.11956	5.90013	5.64906	3.35719	7.70251	6.47797	7.15829	6.43545	5.63598	4.20223	5.365	6.61174	5.34935	6.00458	7.56597	6.0514	6.40501	6.75685	6.08572	7.15546	4.78086	5.66851	6.88684	7.03452	7.25571	3.84941	4.43095	6.61327	6.87277	6.82398
hsa-mir-485	2.5658	2.20676	4.52161	2.71176	2.73101	2.07869	1.56041	3.26114	2.98281	2.61008	3.57074	0.903046	2.37309	2.53152	1.20754	1.40946	2.75842	3.05285	1.06313	2.28719	1.77109	2.02637	3.48811	2.68465	2.73858	2.17901	3.2434	2.22814	1.3574	1.61955	2.47583	3.19715	1.83562	3.01578	3.53403	2.20356	1.6206	0.733401	2.33046	2.2752	2.79164	1.9783	3.1022	2.31301	3.07173	1.79427	1.44911	2.28912	3.50055
hsa-mir-486-1	7.01401	5.71516	8.3542	4.51462	4.12928	5.57747	2.99163	2.26136	3.83137	5.70192	5.18085	3.92696	5.517	4.33108	4.17175	2.82241	5.82288	5.2594	6.94912	5.16709	4.02531	4.98814	2.7741	5.72314	4.14112	3.8488	4.29532	4.53055	2.50758	5.60509	3.03038	3.63691	5.3783	5.60039	5.63282	7.44704	4.9886	7.77466	4.08265	4.41186	4.34011	7.8257	4.35153	7.11132	2.67936	2.4874	9.7238	3.20275	5.50435
hsa-mir-486-2	6.7304	5.72752	8.34448	4.51462	4.30724	5.48817	3.21645	1.99841	4.19086	5.66611	5.10423	4.033	5.59036	4.51473	4.49862	2.93084	5.84372	4.95443	6.82291	5.01954	3.04254	4.77793	2.29091	5.39115	3.62624	3.61953	4.02205	4.58079	2.81265	5.50328	2.91043	3.57231	5.16759	5.6389	5.628	7.51972	4.71576	7.77247	4.49505	4.48981	4.63583	7.69223	4.09316	7.21132	2.37974	2.72138	9.69472	3.47909	5.50435
hsa-mir-487a	1.34355	0.746801	2.64905	1.02917	1.52594	1.28273	1.2489	2.26136	1.44695	1.18672	1.85868	0.659931	0.675559	1.90013	0	1.25116	1.95727	1.39061	0.627355	1.73492	0	1.15673	2.13978	0.990691	1.70914	1.26985	1.42977	0.863107	1.08125	1.41047	0.724074	1.89678	0.59822	0.608844	2.61506	2.32389	1.21442	1.11068	1.71265	1.47124	1.92506	1.22434	2.44972	1.57754	1.26392	1.10562	1.59398	1.65982	2.12411
hsa-mir-487b	3.06716	3.79528	4.36123	3.37402	2.2508	2.86182	2.17308	3.19974	2.15465	2.06724	3.6156	2.63693	2.8016	3.49143	2.3011	2.57753	2.66781	3.05285	1.89672	2.68559	2.07639	1.79037	3.87064	2.15542	3.16089	2.73237	3.86318	2.22814	2.56312	1.96418	3.08681	3.28039	2.35354	3.14984	4.31123	3.87019	1.70649	2.40779	3.20704	2.70371	3.46443	3.03862	3.46493	3.53413	3.13885	3.09925	3.08719	2.57712	4.09397
hsa-mir-488	0	0.293986	0	0	0	0	0.3514	0	0	0	0	0	0	0	0	0	0.497633	0	0	0.473115	0	0	0	0	0	0	0	0	0	0	0.406994	0.627385	0	0	0.732472	1.13884	0	0.221121	0	0	0	0	0	0	0	0.318275	0.194339	0	0
hsa-mir-489	2.13194	0.929102	0	0.429697	0.273647	0	0	0	0	0	0.459696	0	0.675559	0	0	0.351701	0.497633	0	0	0	0	0.691319	0	1.31075	0	0	0	0.863107	0	0	0.983867	0.627385	0	0	0.869361	0.678994	2.13603	0.412811	0.609383	0	0	0	1.08119	0	0	0.41047	0.194339	0.282115	0.565507
hsa-mir-490	1.34355	0.538086	0	0.429697	1.17195	2.1386	5.54072	0.847055	4.04761	2.06724	3.93164	4.35263	0.675559	3.20122	0	3.86068	4.28801	0.856743	1.39736	3.1938	0.851499	0	1.29873	0.990691	2.96513	0	0.885202	0	0	4.03022	0.983867	2.42172	0	0.837988	0.41223	5.7194	0.249311	6.17772	4.66409	5.33245	4.75492	4.5517	0.739388	1.57754	0.678643	5.21735	6.50977	4.62979	1.13735
hsa-mir-491	1.50858	1.80168	2.4313	1.25569	0.503572	1.73492	0.3514	1.13635	2.15465	2.27173	2.35833	1.59933	1.48111	0.751135	2.78502	1.55211	2.10271	2.5523	0.627355	1.89403	1.38336	3.06645	2.55264	3.50652	2.00942	2.38795	3.68463	1.78946	1.08125	1.16586	1.85094	1.89678	2.35354	2.91895	2.26409	2.68015	1.43176	2.16299	2.79844	1.57025	2.208	2.53888	1.96385	2.7978	0.263288	1.10562	2.59622	1.55767	2.53582
hsa-mir-492	0.386867	0	0.909778	0	0.273647	0	0	0	0	0	0	0	0	0	0	0	0	0	0	0	0	0	0	0	0.462865	0.770352	0	0	0	1.16586	0	0	0	0	0	0	0	0	0	0	0	0	0	0	0	0	0	0	0.310287
hsa-mir-493	4.57039	4.77845	6.11069	4.25107	4.71546	3.59761	2.87362	4.6984	4.14467	3.97066	4.48474	3.36178	3.31589	5.21743	3.67638	3.94067	3.98443	4.795	2.80571	4.53119	2.89433	3.97766	3.48811	3.7376	4.8576	3.01022	5.80881	4.15287	3.75465	2.47512	4.16574	4.79147	2.49176	4.37079	4.96638	3.80964	2.96181	2.26594	3.87438	4.20403	4.31647	3.03862	4.90738	2.99025	4.24937	3.63655	3.58005	4.19205	4.94271
hsa-mir-494	2.3214	2.78169	2.24328	1.62373	2.73101	2.25145	1.08704	2.3768	1.44695	1.54325	2.13003	0.659931	0.675559	2.35013	0	1.25116	1.61328	1.39061	2.26697	1.35186	0	1.15673	0.980694	1.57254	2.36766	1.64018	2.95906	1.15603	1.3574	0.500352	1.20394	1.66859	0	1.63234	3.59453	2.1394	0.958431	0.581993	1.46049	1.41907	1.79428	1.65002	1.78857	1.57754	2.07155	1.40359	1.20025	1.19903	2.53582
hsa-mir-495	3.62987	4.16605	4.77414	3.05067	4.22906	3.50959	2.74258	4.1355	4.09695	4.23793	4.84643	2.93924	3.55457	3.73293	3.52049	3.45132	4.25727	4.35492	2.6887	3.86628	2.07639	3.06645	3.87064	3.15333	4.34284	3.61953	5.0889	3.63985	3.34343	3.45278	3.55525	4.28702	3.20501	3.52366	5.03347	4.40833	2.515	3.45132	3.15123	3.1975	3.9057	4.13525	4.03543	3.797	3.67948	2.93822	3.56255	3.13342	3.75249
hsa-mir-496	1.50858	2.34153	3.00541	2.04354	2.18606	1.38522	0.745461	2.48369	1.72323	1.82891	2.95504	1.45419	1.7608	2.35013	0.726588	1.25116	1.7955	1.7794	1.66854	2.03732	2.32823	2.56513	2.13978	1.79404	2.25784	2.17901	2.13359	1.60757	1.78865	1.41047	2.19696	2.26704	1.34571	1.63234	2.05034	1.13884	0.46182	0.412811	1.78778	1.74995	1.10563	0.849514	1.96385	0	1.26392	1.35801	0.657	0.898329	2.27479
hsa-mir-497	4.45375	5.36569	5.38757	3.67766	3.78036	4.33387	3.73538	3.06852	4.97719	3.56668	5.2104	4.2683	4.49184	4.42583	4.11836	4.51153	4.68446	3.42376	4.11619	4.37804	2.07639	4.28116	2.13978	4.19179	4.78027	3.61953	4.29532	4.08488	2.32687	4.80459	4.65065	4.28702	3.79142	4.1539	6.6303	6.14402	4.91834	6.48035	5.51338	4.75479	5.88885	5.61018	5.56731	5.65203	4.33773	5.46049	6.05143	5.27783	3.89892
hsa-mir-498	0	0	0	0	0	0	0	0	0	0	0	0	0	0	0	0	0	0	0	0	0	0	0	0	0	0	0	0	0	0	0	0	0	0	0	0	0	0	0	0	0	0	0	0	0	0	0	0	0
hsa-mir-4999	1.15718	0.538086	1.46337	0.760351	0	1.1724	1.38141	0	0	0.712084	0.459696	0.659931	1.13385	0.751135	0.726588	0.634248	0.86694	0.856743	0	1.35186	0	1.50806	1.55916	0	0.462865	1.64018	0.885202	0.495159	1.47788	0.500352	0.724074	0	1.34571	0.608844	0.99438	1.00123	1.70649	0.870418	1.46049	0.91556	0	0	0.290608	1.40808	0	0.578869	1.20025	0	0.970717
hsa-mir-499a	0.691626	0.293986	0	0.429697	0.273647	1.38522	0.111221	0	0.655751	0.712084	0.459696	0	0	0.751135	0	0.634248	0.497633	0	0	0.473115	2.54257	0.691319	1.7797	0	0	0.770352	0	1.60757	0.290631	0.500352	1.39484	0	2.35354	0	1.40801	0	1.0921	0.733401	1.71265	0.135506	0.219786	0.617859	0.739388	0.412258	0.263288	0.219784	0.783247	1.44774	0.310287
hsa-mir-499b	0	0	0	0.760351	0	0	0	0	0	0	0	0	0	0	0	0	0	0	0	0	0	0	0	0	0	0	0	0	0	0	0	0	0	0	0	0	0	0	0	0	0	0	0.290608	0	0	0	0	0	0
hsa-mir-5000	1.34355	1.70497	1.34359	3.27408	1.29984	1.81054	0.87719	1.2618	1.95501	0	1.32251	1.11104	1.7608	1.24259	1.56762	0.870418	1.40467	1.39061	0	0.828799	0	2.56513	1.29873	1.79404	1.70914	1.64018	2.13359	1.95097	1.08125	1.61955	2.70943	0.627385	1.61136	0.837988	1.72909	1.00123	1.32718	1.57902	1.54953	1.47124	1.31095	0.617859	0.532378	1.40808	1.48641	1.35801	1.00676	1.32874	0.970717
hsa-mir-5001	0	0.929102	1.46337	1.77764	0.503572	0.237715	0.126884	0.262681	1.10492	0	0.459696	0	0	0.751135	1.56762	0.634248	0	1.39061	0	0	0.851499	0.691319	0	0	0	0.770352	0.885202	0	0	0.500352	1.20394	0	0.59822	1.20951	0.41223	0.84909	1.0921	0.221121	1.03648	0	0.578873	0.617859	1.35732	1.40808	0.263288	0.318275	0.89933	0.517984	1.13735
hsa-mir-5002	0	0	0	0	0	0.441747	0.338005	0.998941	0	0	0	0	0.675559	0	0	0.870418	0	0	0	0	0	0	0	0	0.462865	0.770352	0	0	0	0	0.406994	0	0	0	0.220789	0.486129	0	0	0.433392	0	0	0	0	0	0	0.114074	0.518636	0	0
hsa-mir-5003	0	0.538086	0.286513	0	0.273647	0.441747	0.126884	0.262681	1.10492	0	0.459696	0	0	1.24259	0	0	0.497633	0	0	0.828799	0	0.691319	0	0.578763	0.812745	0	0	1.15603	0	0	0.406994	0	0	0	0.581218	0.263444	0	0	0.232909	0.25937	0.578873	0.341756	0.290608	0	0	0.114074	0.194339	0.282115	0
hsa-mir-5004	0	0	0	0	0	0	0	0	0	0	0	0	0	0	0	0	0	0	0	0	0	0	0	0	0	0	0	0	0	0	0	0	0	0	0	0	0	0	0	0	0	0	0	0	0	0	0	0	0
hsa-mir-5006	0	0.293986	0	0	0	0	0.111221	0	0	0	0	0	0	0.751135	0	0	0	0	0	0	0	0	0	0.990691	0	0	0	0	0	0	0	0	0	0	0	0	0	0	0	0	0.219786	0.341756	0	0.412258	0	0	0	0.282115	0.310287
hsa-mir-5007	0	0	0	0	0	0	0	0	0	0	0	0	0	0	0	0	0	0	0	0	0	0	0	0	0	0	0	0	0	0	0	0	0	0	0	0	0	0	0	0	0	0	0	0	0	0	0	0	0
hsa-mir-5008	0	0	0	0.429697	0	0	0	0.262681	0	0	0	0	0	0	0	0	0	0	0	0	0	0	0	0.990691	0.462865	0	0	0	0	0	0	0	0	0	0.41223	0	0	0	0	0	0	0	0.290608	0	0	0	0.194339	0	0
hsa-mir-5009	0	0.293986	0.286513	0	0.273647	0	0	0	0	0	0	0	0	0	0	0	0.497633	0	0	0	0	0	0	0	0	0	0	0	0	0	0	0	0	0	0	0	0.647008	0	0	0	0	0	0	0	0	0	0	0	0
hsa-mir-500a	9.52486	7.67858	8.20859	8.93314	9.2478	8.2372	7.61326	8.8187	9.45034	8.13523	8.18708	7.97477	10.2971	8.2298	9.7171	7.60173	7.96216	8.80157	8.87488	8.329	7.71519	8.60558	6.89219	8.72956	7.22557	8.52339	9.166	9.29253	8.75472	7.41409	8.49772	7.86461	9.2205	8.78543	9.36053	7.66494	8.48571	7.01351	8.60325	7.53181	7.74992	7.38594	8.06311	7.89779	6.04589	6.88065	7.12937	8.41066	7.36114
hsa-mir-500b	4.69553	2.57833	3.38496	4.32785	4.16331	3.34132	4.16994	4.08547	3.70975	2.7535	2.72874	2.16351	3.99371	2.53152	4.49862	1.25116	2.57113	3.3104	3.10873	2.39757	1.77109	3.66453	0.980694	4.23024	2.81812	3.13135	3.68463	3.13423	3.27855	2.57887	2.97165	1.66859	4.65254	3.94846	3.86398	2.58701	4.75661	2.16299	3.83949	1.98344	2.89101	3.03862	3.57708	4.18586	1.48641	1.95598	2.48913	3.71091	3.56046
hsa-mir-501	6.93644	4.98819	6.20393	6.37296	6.50477	5.33654	5.14448	6.21514	6.83017	5.80433	5.65916	5.02726	7.54945	5.99654	6.87701	5.42498	5.80173	7.13425	6.7223	5.47468	5.15332	6.64351	3.82182	7.02586	5.55917	6.39696	7.7445	6.47634	6.19151	5.49003	6.74921	6.19876	6.9991	7.17065	6.83642	5.06416	6.67399	4.48332	6.38708	4.99648	5.53151	4.91339	5.91016	5.71698	3.29415	4.32833	4.50016	5.89554	5.61444
hsa-mir-5010	1.50858	0.929102	0.909778	2.04354	1.29984	1.38522	0.922766	1.13635	0	0	0	0	0.675559	0.751135	0.726588	0.634248	0.86694	0.856743	0.627355	0.828799	0.851499	1.15673	0	1.31075	0.462865	0.770352	0.885202	1.78946	0	0.500352	1.56341	0.627385	0.59822	1.36464	0.220789	0.84909	0.249311	0.221121	0.232909	0.479139	0.578873	1.65002	0.532378	1.72917	0.485863	0.318275	0.657	0.720654	1.42206
hsa-mir-5011	0	0	0	0	0	0	0	0	0	0	0	0	0	0	0	0	0	0	0	0	0	0	0	0	0	0	0	0	0	0	0	0	0	0	0	0	0	0	0	0	0	0	0	0	0	0	0	0	0
hsa-mir-502	5.25602	3.53892	4.23226	4.67996	4.12928	3.66027	3.84618	4.01593	3.77184	3.56668	3.15061	2.56805	4.70504	3.87404	5.04794	3.12595	3.49792	4.10592	4.02259	3.13127	2.72915	4.49291	3.2132	5.15177	3.16089	4.55961	5.40953	4.55589	3.89111	3.65623	3.29276	3.35909	5.89672	4.88823	4.91985	3.56296	5.87122	3.16199	4.36616	2.72536	3.548	3.89719	3.91254	4.88	2.63355	3.37572	3.29222	4.10419	3.9446
hsa-mir-503	2.70839	2.91737	3.63504	5.54836	2.37217	3.02944	2.56029	3.06852	5.02897	3.97066	2.35833	1.11104	4.89075	3.30458	5.25999	4.52889	4.3765	5.31923	3.63684	2.68559	4.16123	4.13738	2.29091	3.44246	3.48716	3.3468	5.22581	3.89939	2.19245	3.08101	3.74254	4.16089	5.14681	4.40694	3.53403	1.26447	4.04163	1.31658	4.84207	3.34461	3.07129	2.78252	4.93921	2.49332	1.00076	1.53228	1.10675	3.09747	4.81326
hsa-mir-504	0.386867	0	0.286513	0	0	0.441747	0.229065	1.13635	0.655751	0.712084	0.807771	0.659931	0	1.24259	0	0.870418	0	0.856743	0.627355	0.828799	0	0	0	0.578763	0.462865	0	0	0	0.532417	0.500352	0.983867	1.66859	0	0	1.49522	1.92781	1.6206	0.733401	1.03648	0.479139	0.219786	1.04907	1.69223	0.732515	0.485863	0.729651	1.72561	0.517984	0.565507
hsa-mir-5047	0	0.293986	0	0	0	0	0	0	0	0	0	0	0	0	0	0	0	0	0	0	0	0	0	0	0	0	0	0	0	0	0	0	0	0	0	0	0	0	0	0	0	0	0	0	0	0	0	0	0
hsa-mir-505	5.32406	5.35776	6.41921	6.89858	4.55807	5.64616	4.89772	6.60079	6.05744	6.38066	5.30928	3.98095	6.58432	5.48283	7.00754	5.33904	5.5332	6.37339	5.02655	5.00217	5.59867	6.71279	3.13542	6.10053	6.60113	6.86706	7.2697	5.63598	5.64025	5.83201	5.65935	4.51036	6.07224	6.78064	6.34643	6.29521	6.28125	5.75057	6.89587	5.79589	5.84409	5.9591	7.13414	6.66138	3.90831	4.74609	5.9236	6.63013	6.88676
hsa-mir-506	0	0	0	0	0	0	0	0	0	0	0.459696	0	0	0	0	0	0	0	0	0	0	0	0	0	0	1.64018	0	0	0	0	0	0.627385	0	0.336305	0	0	0.249311	0	0.232909	0	0	0	0	0	0.263288	0	0	0	0
hsa-mir-507	0	0	0	0	0	0	0	0	0	0	0.459696	0	0	0	0	0	0	0	0	0	0	0	0	0	0	0	0	0	0	0	0	0	0	0	0	0	0	0	0	0	0	0	0.290608	0	0	0.114074	0	0	0
hsa-mir-508	3.55634	3.92974	2.54428	3.05067	1.72135	2.1386	0.904708	2.5343	1.44695	2.4508	3.47662	1.73119	1.48111	1.90013	2.3011	1.40946	0.497633	0.856743	1.06313	1.35186	2.89433	3.73283	0	1.57254	1.86708	6.14696	0	2.34901	0.920445	0	3.33996	2.42172	3.12229	3.06187	1.57746	1.67976	2.19665	1.11068	3.38694	0.669814	0.578873	2.16185	1.96385	0.732515	2.76683	0.729651	1.28806	1.44774	1.86374
hsa-mir-5087	0	0	0	0	0	0	0	0	0	0	0	0	0	0	0	0	0	0	0	0	0	0	0	0	0	0	0	0	0	0	0	0	0.59822	0	0	0	0	0.221121	0.232909	0	0	0	0	0	0	0	0	0	0
hsa-mir-5088	0	0	0	0	0	0.237715	0	0	0	0	0	0	0	0	0	0.351701	0	0	0	0	0	0	0	0	0	0	0	0	0	0	0	0	0	0	0.220789	0	0	0	0	0	0	0	0	0	0	0	0	0	0
hsa-mir-5089	0	0	0	0	0	0	0	0	0	0	0	0	0	0	0	0	0	0	0	0	0	0	0	0	0	0	0	0	0	0	0.406994	0	0	0	0	0	0	0	0	0	0	0	0	0	0	0	0	0	0
hsa-mir-5090	0	0	0	0.429697	0	0.441747	0.111221	0.484822	0	0	0	0	0	0	0	0	0	0	0	0	0	0.691319	0	0.578763	0	0	0	0	0.290631	0	0	0	0	0.336305	0	0.263444	0.46182	0	0.232909	0	0	0	0	0.412258	0.263288	0	0.194339	0	0.310287
hsa-mir-5091	0.691626	0.538086	0.909778	1.45141	0	0	0.214479	0.262681	0	0	0	0	0	0	0.726588	0.351701	0	0	0	0.473115	0	0.691319	0	0.990691	1.09412	0.770352	0	0.495159	0.290631	0	0.983867	1.06317	0.59822	0.837988	0.732472	0.486129	0.811106	0	1.15472	0.479139	0.219786	1.04907	0.739388	0.412258	0.848674	0.114074	0.194339	0.517984	0
hsa-mir-509-1	1.65666	1.23642	0.286513	1.25569	0	0.441747	0.3514	0.677277	1.10492	0.712084	1.32251	1.29279	0.675559	1.24259	0.726588	0.351701	0.86694	0.856743	0	0.473115	1.77109	1.79037	0	0.578763	0.462865	3.24309	0	1.60757	0.290631	0	1.20394	0	1.34571	0.608844	0.581218	0	1.21442	0	0	0	0	0.849514	0	0	0.678643	0.219784	0.194339	0	0.782292
hsa-mir-5092	0	0	0.525446	0.429697	0.273647	0.620465	0	0.677277	0	0	0	0	0	0	0	0	0	1.39061	0	0	0	0.691319	0	0.990691	0.812745	0	0.885202	0	0.739437	0.500352	0.406994	0	0	0.336305	0.581218	0.486129	0.249311	0.221121	0.232909	0	0.219786	0	0.532378	0	0.263288	0	0.194339	0.282115	1.65973
hsa-mir-509-2	2.13194	0.538086	0	1.45141	0	0.441747	0.338005	0.677277	0	0	1.32251	0.367374	1.13385	0	1.20754	1.07331	0	0	0	0	2.07639	1.79037	0.572121	0.578763	0.812745	3.24309	0	1.15603	0	0	0.406994	0	1.83562	1.50469	0.41223	0.486129	0.811106	0	0.609383	0.135506	0.219786	0	0	0	1.67912	0	0.365581	0.517984	0
hsa-mir-5093	0	0	0	0	0	0	0	0	0	0	0	0	0	0	0	0	0	0	0	0	0	0	0	0	0	0	0	0	0	0	0	0	0	0	0	0	0	0	0	0	0	0	0	0	0	0	0	0	0
hsa-mir-509-3	2.02698	0.929102	0.909778	1.02917	0.503572	0.620465	0	1.13635	0.655751	0.712084	2.00073	0.659931	1.13385	0.751135	0.726588	0.634248	0.497633	1.39061	0	0	0	1.50806	0	0.578763	0.462865	3.8488	0.885202	1.78946	0	0	1.97573	0	1.01984	1.50469	0.220789	0.263444	1.32718	0	0	0.135506	0	0	0	0	0.848674	0.114074	0.194339	0.517984	1.13735
hsa-mir-5094	0.386867	0.538086	0.286513	0	0	0	0.111221	0	0	0	0	0	0	0	0	0.351701	0	0	0	0	0	0	0	0.990691	0.812745	0	0	0	0.532417	0	0.406994	0	0	0.336305	0	0	0.249311	0	0	0.135506	0	0	0.920387	0	0	0.114074	0	0	0
hsa-mir-5095	0	0	0	0	0	0	0	0	0	0	0	0	0	0	0	0	0	0	0	0	0	0	0	0	0	0	0	0	0	0	0	0	0	0	0	0	0	0	0	0	0	0	0	0	0	0	0	0	0
hsa-mir-5096	0	0	0	0	0	0	0	0	0	0	0	0	0	0	0	0	0	0	0	0	0	0	0	0	0	0	0	0	0	0	0	0	0	0	0	0	0	0	0	0	0	0	0	0	0	0	0	0	0
hsa-mir-510	0	0	0	0	0	0	0	0	0	0	0	0	0	0	0	0	0	0	0	0	0	0	0	0	0	0	0	0	0	0	0	0	0	0	0	0	0	0	0	0	0	0	0	0	0	0	0	0	0
hsa-mir-5100	0	0.293986	0	0	0	0	0	0	0	0	0	0	0	0	0	0	0	0	0	0	0	0	0	0	0	1.26985	0	0	0	0	0	0	0	0	0	0	0	0	0	0	0	0	0	0.412258	0	0	0	0.282115	0
hsa-mir-511	1.50858	2.20676	4.86395	5.3042	2.73101	2.1386	3.47869	1.92444	4.32116	1.82891	3.6156	3.23421	3.88127	4.78876	5.64686	3.37659	4.48662	5.40457	3.63684	3.56887	3.29985	3.06645	2.13978	5.06934	3.38638	4.42391	4.62741	4.65301	3.02531	4.88775	3.08681	4.11627	3.12229	4.69707	4.27472	4.23499	3.97396	3.63565	4.32891	3.15027	4.44193	4.02112	4.62378	4.33517	0.485863	2.85863	3.99971	5.35599	4.5283
hsa-mir-512-1	0.691626	0	0	0	0	0	0.126884	0.262681	0	0	0.459696	0	0	0	0	0.351701	0.497633	0	0	0	0	0	0	0	0	1.64018	0	0.495159	0	0	1.20394	0	0	0.336305	0	0	0	0	0.232909	0	0	0	0.532378	0	0	0	0.194339	0	0
hsa-mir-512-2	0.386867	0	0	0.429697	0	0	0	0	0.655751	0.712084	0	0	0	0.751135	0	0.351701	0	0	0	0	0	0	0	0	0.462865	0.770352	0	0	0.739437	0	1.56341	0	0	0	0	0	0.249311	0	0	0	0	0	0	0	0	0	0	0	0
hsa-mir-513a-1	0	0	0	0	0	0	0	0.262681	0	0	0	0	0	0	0	0	0	0	0	0	0	0	0	0	0	0	0	0	0	0	0	0	0	0.336305	0	0	0	0	0	0	0	0	0	0	0	0	0.194339	0	0
hsa-mir-513a-2	0	0	0	0	0	0	0	0	0	0	0	0	0	0	0.726588	0	0	0	0	0	0	0	0	0	0	0	0	0	0	0	0	0	0.59822	0	0	0	0	0	0	0	0	0	0	0	0	0	0	0.282115	0
hsa-mir-513b	0	0	0	0.760351	0	0	0	0	0	0	0	0	0	0	0	0	0	0	0	0	0	0.691319	0	0	0	0	0	0	0	0	0	0	0.59822	0	0	0	0.46182	0	0.232909	0	0	0	0	0	0	0	0.194339	0	0
hsa-mir-513c	0	0.293986	0	0	0	0	0	0	0	0	0	0	0	0	1.20754	0	0	0	0	0	0	0	0	0	0	0	0	0	0	0	0	0	0	0.336305	0	0.263444	1.21442	0	0.232909	0	0	0	0	0	0	0	0.194339	0	0
hsa-mir-514a-1	1.15718	1.23642	0.909778	1.02917	0.503572	0.237715	0	0.677277	0	0.712084	0.807771	0	0	0	0	0.351701	0	0	0	0	1.38336	0.691319	0	0	0	4.51578	0	0.495159	0	0.500352	0.983867	0	0.59822	0.336305	0.732472	0	0.46182	0	0	0.25937	0.219786	0	0.920387	0	0.485863	0.318275	0	0	0.310287
hsa-mir-514a-2	0	0.929102	0.525446	1.91671	0	0	0	0.847055	0.655751	0.712084	0	0	0	0	0	0	0	1.39061	0	0	0.851499	0	0	0	0	4.2741	0	0.495159	0	0	1.85094	0	0	0.608844	0.220789	0	0.249311	0	0	0.373436	0.219786	0	0.920387	0	0.678643	0.318275	0	0.282115	0.310287
hsa-mir-514a-3	0.691626	0.746801	0.525446	1.62373	0.701841	0.620465	0	0	0.655751	0	0.807771	0	0	1.24259	0	0.634248	0	0	0	0.828799	0	0.691319	0	0.578763	0.462865	3.77635	0	1.15603	0	0	0.983867	0	0	0	0.869361	0	0.46182	0	0.232909	0.135506	0	0	1.08119	0.412258	0	0.318275	0.365581	0	0.310287
hsa-mir-514b	0.386867	0.293986	0	0	0	0	0	0	0.655751	0	0	0	0	0	0	0	0	0	0	0	0	0	0	0	0	0.770352	0	0	0	0	0	0	0	0.336305	0	0	0.249311	0	0	0	0	0	0.290608	0.412258	0	0	0	0	0.310287
hsa-mir-515-1	0.386867	0	0	0	0	0	0	0	0	0	0	0	0	0	0	0	0	0	0	0	0	0	0	0	0	0	0	0	0	0	0	0	0	0	0	0	0	0	0	0	0	0	0	0	0	0	0	0	0
hsa-mir-515-2	0	0	0	0	0	0	0	0.262681	0	0	0.459696	0	0	0	0	0	0	0	0	0	0	0	0	0	0	0	0	0	0	0	0	0	0	0	0	0	0	0	0	0	0	0	0	0	0	0	0	0	0
hsa-mir-516a-1	0.386867	0	0	0	0.273647	0.441747	0	0.998941	1.44695	0.712084	0	0	0	0	0	0	0	0	0	0	0	0	0	0	0	0	0	0	0	1.61955	2.84649	0	0	0.336305	0	0	0	0	0	0	0	0	0.290608	0	1.13833	0.114074	0.194339	2.00851	0
hsa-mir-516a-2	0	0	0	0	0	0.620465	0.126884	0	0.655751	0	0	0	0.675559	0	0	0	0	0	0	0	0	0	0	0	0	0	0	0	0	0.500352	2.63569	0	0	0	0	0	0	0	0	0.135506	0	0	0	0	0.678643	0	0	1.44774	0
hsa-mir-516b-1	0	0	0	0	0	0	0	0	0	0	0	0	0	0	0	0	0	0	0	0	0	0	0.572121	0	0	1.64018	0	0	0	0	0.406994	0.627385	0	0	0	0	0	0	0	0	0	0	0	0	0.263288	0	0	0	0
hsa-mir-516b-2	0	0	0	0	0	0	0	0	0	0	0	0	0	0	0	0	0	0	0	0	0	0	0	0	0	0	0	0	0	0	0.406994	0	0	0	0	0	0	0	0	0	0	0	0	0	0.678643	0	0	0	0
hsa-mir-517a	0	0	0.286513	0	0	0	0	0	0	0	0.459696	0.367374	0	0.751135	0	0	0	0	0	0	0	0	0.572121	0	0	1.64018	0	0.495159	0	0	0.983867	0	0	0	0	0	0	0	0	0	0	0	0	0	0.485863	0	0	0	0.310287
hsa-mir-517b	0	0	0.286513	0	0	0	0	0	0	0	0.459696	0.367374	0	0.751135	0	0	0	0	0	0	0	0	0.572121	0	0	1.64018	0	0.495159	0	0	0.983867	0	0	0	0	0	0	0	0	0	0	0	0	0	0.485863	0	0	0	0.310287
hsa-mir-517c	0	0	0	0	0	0	0	0	0	0	0	0	0	0	0	0	0	0	0	0	0	0	0	0	0	0	0	0	0	0	0	0	0	0	0	0	0	0	0	0	0	0	0	0	0	0	0	0	0
hsa-mir-5186	0	0	0	0	0	0	0	0	0	0	0	0	0	0	0	0	0	0	0	0	0	0	0	0	0	0	0	0	0	0	0	0	0	0	0	0	0	0	0	0	0	0	0	0	0	0	0	0	0
hsa-mir-5187	0	0.538086	0.525446	0	0.273647	0.441747	0.510245	0.262681	1.10492	0	0	0	0	0	0.726588	0.351701	0.497633	1.39061	0.627355	0.473115	0	0.691319	0	0.578763	0.462865	0	0	0.495159	0	0	0.406994	0	0.59822	0.336305	0.41223	0	0.647008	0.412811	0.232909	0.25937	0.578873	0.341756	0	0	0.485863	0.318275	0.657	0.720654	0.565507
hsa-mir-5188	0.386867	0	0	0	0	0	0	0	0	0	0	0	0	0	0	0	0	0	0	0	0	0	0	0	0	0	0	0	0	0	0	0	0	0.336305	0	0	0	0.412811	0	0	0	0	0	0	0	0	0	0	0
hsa-mir-5189	0.386867	0	0.286513	0.429697	0	0	0	0.262681	0	0	0	0	0	0	0	0	0	0	0	0	0	0.691319	0	0	0	0	0	0	0	0	0	0	0	0	0	0	0	0	0	0	0	0	0	0	0.263288	0	0.194339	0	0
hsa-mir-518a-1	0	0	0	0	0	0	0	0	0	0	0	0	0	0	0	0	0	0	0	0	0	0.691319	0	0	0	0	0	0	0	0	0	0	0	0	0	0	0	0	0	0	0	0	0	0	0	0	0	0	0
hsa-mir-518a-2	0	0	0	0	0	0.237715	0	0	0	0	0	0	0	0.751135	0	0	0	0	0	0	0	0	0	0	0	0.770352	0	0.495159	0	0	0.724074	0	0	0	0	0	0	0	0.232909	0	0	0	0	0	0	0	0	0.517984	0
hsa-mir-518b	0.691626	0	0.286513	0	0	0	0	0	0	0	0	0	0	0.751135	0	0	0.497633	0	0	0	0	0	0	0	0	0	0	0.863107	0	1.16586	0	0	0	0.336305	0	0	0	0	0	0	0.219786	0	0	0	0.485863	0	0	0	0.310287
hsa-mir-518c	0.386867	0	0	0	0	0	0	0	0.655751	0	0	0	0	0.751135	0	0	0	0	0	0	0	0	0	0	0	1.26985	0	0	0	0	1.20394	0	0	0.608844	0	0	0	0	0	0.135506	0	0	0	0	0	0	0	0	0
hsa-mir-518d	0	0	0	0	0	0	0	0	0	0	0	0	0	0	0	0	0	0	0	0	0	0	0	0	0	0	0	0.495159	0	0	0	0.627385	0	0	0	0	0	0	0	0	0	0	0	0	0	0	0	0	0
hsa-mir-518e	0	0	0	0	0	0	0	0	0	0.712084	0	0	0	0	0	0	0	0	0	0	0	0.691319	0	0	0	0	0	0	0	0	1.85094	0	0	0	0	0	0	0	0	0	0	0	0	0	0.263288	0	0.194339	0	0
hsa-mir-518f	0.386867	0	0	0	0	0.237715	0	0	0	0	0	0	0	0	0	0	0	0	0	0	0	0	0	0	0	0	0	0.495159	0	0	0.983867	0	0.59822	0	0	0	0	0	0	0	0	0	0	0	0	0	0	0	0
hsa-mir-5190	0	0	0	0	0	0	0	0	0	0	0	0	0	0	0	0	0	0	0	0	0	0	0	0	0	0	0	0	0	0	0	0	0	0	0	0	0.249311	0	0	0	0	0	0	0	0	0	0	0	0
hsa-mir-5191	0	0	0	0	0	0	0	0	0	0	0	0	0	0	0	0	0	0	0	0	0	0	0	0	0	0	0	0	0	0	0	0	0	0	0	0	0	0	0	0	0	0	0	0	0	0	0	0	0
hsa-mir-5192	0	0.293986	0	0	0	0	0	0	0	0	0	0	0	0	0	0	0	0	0	0	0	0	0	0	0.812745	0	0	0	0	0	0	0	0	0	0	0	0	0	0	0	0	0	0	0	0	0	0	0	0
hsa-mir-5193	0	0.293986	1.06932	0.429697	0	0	0	0	0	0	0	0	0	0	0	0	0	0	0	0	0	0.691319	0	0	0	0	0.885202	0	0	0	0	0	0	0.336305	0	0.486129	0.811106	0.581993	0	0	0.219786	0.617859	0.290608	0.412258	0	0.41047	0.365581	0.282115	1.13735
hsa-mir-5194	0	0	0	0	0	0	0	0	0	0	0	0	0	0	0	0	0	0	0	0	0	0	0	0	0	0	0	0	0	0	0	0	0	0	0	0	0	0	0	0	0	0	0	0	0	0	0	0	0
hsa-mir-5195	0	0	0	0	0	0	0	0	0	0	0	0	0	0	0	0	0	0	0	0	0	0	0	0	0	0	0	0	0	0	0	0	0	0	0	0	0	0	0	0	0	0	0	0	0	0	0	0	0
hsa-mir-5196	0.386867	0	0	0	0	0	0	0	0	0	0	0	0	0	0	0	0	0	0	0	0	0	0	0	0	0	0	0	0	0	0	0	0	0	0.581218	0	0	0.221121	0	0	0	0	0	0	0	0	0	0	0
hsa-mir-5197	0	0	0	0	0	0	0	0	0	0	0	0	0	0	0	0	0	0	0	0	0	0	0	0	0	0	0	0	0	0	0	0	0	0	0	0	0	0	0	0	0	0	0	0	0	0	0	0	0
hsa-mir-519a-1	0.691626	0	0	0.429697	0	0.237715	0.126884	1.37721	2.33	1.54325	0	0	0	0.751135	0	0	0	0	1.39736	0	0	0	0	0	0.812745	1.93461	0	0.495159	0.290631	0.871148	4.31494	0	0	0	0	0	0	0	0	0	0	0	0	0	0.263288	0	0	2.94397	0
hsa-mir-519a-2	0	0	0	0	0	0.237715	0	0.262681	0.655751	0	0	0	0.675559	1.24259	0	0	0.497633	0	0	0.473115	0	0	0	0	0	0.770352	0	0	0	1.16586	2.91043	0	0	0	0	0	0	0	0	0	0	0	0	0	0.263288	0	0.194339	1.84467	0
hsa-mir-519b	0	0	0	0	0	0	0	0	0	0	0	0	0	0	0	0	0	0	0.627355	0	0	0	0	0	0	0	0	0	0	0	0.406994	0	0	0	0	0	0	0	0.232909	0	0	0	0	0	0	0	0	0	0
hsa-mir-519c	0	0	0	0	0.273647	0	0	0	0	0	0	0	0	0.751135	0	0	0	0.856743	0	0	0	0	0	0	0	0	0	0	0	0.500352	0	0	0	0.336305	0	0	0	0	0	0	0	0	0	0	0	0	0	0	0
hsa-mir-519d	0.386867	0.293986	0	0	0	0	0	0	0	0	0	0	0	0	0	0	0	0	0	0	0	0	0	0	0	0	0	0	0	0	0	1.06317	0	0.336305	0	0	0	0	0	0	0.219786	0	0	0	0	0.219784	0	0	0
hsa-mir-519e	0	0	0	0	0	0	0	0	0	0	0	0	0	0	0	0	0	0	0	0	0	0	0	0	0	0	0	0	0	0	0	0	0	0	0	0	0	0	0	0	0	0	0	0	0	0	0	0	0
hsa-mir-520a	0	0	0	0	0	0	0	0.262681	0	0	0	0	0	0	0	0	0.86694	0	0	0.473115	0	0.691319	0	0.578763	0	0	0	0.863107	0.290631	0	1.39484	0	0	0	0	0	0	0	0	0	0	0	0	0	0.848674	0.114074	0.194339	0	0
hsa-mir-520b	0.386867	0	0	0	0	0	0	0	0	0	0	0.367374	0.675559	0.751135	0	0	0.86694	0	0	0	0	0	0	0	0	0	0	0	0	0	0.983867	0	0	0	0	0	0	0	0	0	0	0	0	0	0	0	0.194339	0.282115	0
hsa-mir-520c	0.386867	0	0	0	0	0	0	0	0	0	0	0.367374	0	0	0	0	0.497633	0	0	0	0	0	0	0	0	0	0	0	0	0	0	0	0	0	0	0	0	0	0	0	0	0	0	0	0	0	0	0	0
hsa-mir-520d	0.386867	0	0	0	0	0	0	0	0	0	0	0	0	0	0	0	0	0	0	0	0	0	0	0	0	0	0	0	0.290631	0	0.724074	0	0	0	0	0	0	0	0	0	0	0	0	0	0.263288	0	0.518636	0	0
hsa-mir-520e	0	0	0	0	0	0	0	0	0	0	0	0	0	0	0	0	0	0	0	0	0	0	0	0	0	0	0	0	0	0	0.406994	0	0	0	0	0	0	0	0	0	0	0	0	0	0	0	0	0	0
hsa-mir-520f	0	0	0	0	0.503572	0	0	0	0	0	0	0.367374	0	0	0	0	0	0	0	0	0	0	0	0	0	0.770352	0	0	0	0	0.983867	0	0	0	0	0	0	0	0	0	0	0	0	0	0.485863	0	0.194339	0	0
hsa-mir-520g	0.386867	0	0	0	0	0	0	0	0	0	0	0	0	0	0	0	0.497633	0	0	0	0	0	0.572121	0	0	0	0	0	0.290631	0	0.983867	0	0	0	0	0	0	0	0	0	0	0	0	0	0.485863	0	0	0	0.565507
hsa-mir-520h	0.386867	0	0	0	0	0	0	0	0	0	0	0	0	0	0	0	0	0	0	0.473115	0	0	0	0	0	0	0	0	0	0	0.406994	0	0	0	0	0	0	0	0	0	0	0	0	0	0	0	0	0	0
hsa-mir-521-1	0	0	0	0.429697	0	0	0	0	1.10492	0	0	0	0	0	0	0	0	0	0	0	0	0	0	0	0	0	0	0	0	0	0.724074	0	0	0	0	0	0	0	0	0	0	0	0	0	0	0	0.194339	0.282115	0
hsa-mir-521-2	0	0	0	0	0	0	0	0	0	0	0	0	0	0	0	0	0	0	0	0	0	0	0	0	0	0	0	0	0	0	0	0	0	0	0	0	0	0	0	0	0	0	0	0	0	0	0	0	0
hsa-mir-522	0	0	0	0	0	0.237715	0	0.262681	2.33	0	0	0	0	0.751135	0	0	0	0	0	0.473115	0	0	0.572121	0	0	0	0	0	0	1.41047	3.08681	0	0	0	0	0	0	0	0	0	0	0	0	0	0.485863	0	0	1.84467	0
hsa-mir-523	0	0	0	0	0	0	0	0	0	0	0	0	0	0	0	0	0	0	0	0	0	0	0	0	0	0	0	0	0	0	0	0	0	0	0	0	0	0	0	0	0	0	0	0	0	0	0	0	0
hsa-mir-524	0	0	0	0	0	0	0	0	0	0	0	0	0	0	0	0	0	0	0	0	0	0	0	0	0	0	0	0	0	0	0.406994	0	0	0	0	0	0	0	0	0	0	0	0	0	0	0	0	0	0
hsa-mir-525	0	0	0.286513	0	0	0	0	0	0	0	0	0	0.675559	0	0	0	0	0	0	0	0	0.691319	0	0	0	0	0	0	0	0	0.406994	0	0	0	0	0	0	0	0	0	0	0	0	0	0.678643	0	0	0	0.310287
hsa-mir-526a-1	0	0	0	0	0	0	0	0	0	0	0	0	0	0	0	0	0	0	0	0	0	0	0	0	0	0	0	0	0	0	0	0	0	0	0	0	0	0	0	0	0	0	0	0	0	0	0	0	0
hsa-mir-526a-2	0	0	0	0	0	0	0	0	0	0	0	0	0	0	0	0	0	0	0	0	0	0	0	0	0	0	0	0	0	0	0	0	0	0	0	0	0	0	0	0	0	0	0	0	0	0	0	0	0
hsa-mir-526b	0.386867	0	0	0.429697	0	0.237715	0	0.262681	0	0.712084	0.459696	0.367374	0	0.751135	0	0	1.16072	0	0	0	0	0.691319	0	0	0	1.26985	0.885202	0	0	0.500352	1.85094	0.627385	0	0.336305	0	0	0.249311	0.221121	0	0	0	0	0.290608	0	0.263288	0	0	0	0
hsa-mir-527	0	0	0	0	0	0.237715	0	0	0	0	0	0	0	0	0	0	0	0	0	0	0	0.691319	0	0	0	0	0	0.495159	0	0	0.406994	0	0	0	0	0	0	0	0.232909	0	0	0	0	0	0	0	0	0.720654	0
hsa-mir-532	11.3851	9.79794	10.1789	10.8998	10.403	9.70191	9.53011	9.7444	10.5944	10.2854	9.49107	9.39122	11.1111	9.40507	10.738	9.44435	8.90575	10.319	10.8105	9.73029	9.22363	10.3653	7.4572	10.6502	9.07794	10.1223	10.6757	10.7371	10.1762	8.58827	9.4833	8.93561	11.7517	10.715	10.6269	9.16081	10.8159	8.53606	10.4239	9.04346	8.7734	9.39157	9.38998	9.48937	8.3378	9.04575	9.0941	10.3941	9.06247
hsa-mir-539	2.8989	3.26136	5.43962	3.75385	3.22564	3.1214	2.48575	3.55877	4.27902	4.13688	3.52445	3.18905	4.19529	4.06278	3.43574	3.62277	3.49792	3.62682	3.10873	4.11273	3.41312	4.08608	4.21113	3.23123	4.01177	3.44355	4.72305	2.91679	3.34343	2.57887	2.97165	4.28702	2.20067	3.76563	4.57417	4.71386	2.81485	2.53693	3.58949	3.50337	3.98281	3.94805	3.99561	3.53413	1.92712	3.18005	3.72868	3.26889	4.73742
hsa-mir-541	0.943099	0.746801	0.730372	0	0.503572	0.237715	0.338005	0.262681	0	0	1.52419	0.659931	0	2.1426	1.20754	1.07331	1.16072	0.856743	0	1.35186	0	0	0	0	1.53176	0	0.885202	0	0.532417	0.500352	0.406994	0.627385	0	0.608844	1.79932	0.263444	0.249311	0.581993	0.609383	1.18917	1.49066	0	0.532378	0	0.678643	1.31094	0.365581	0.720654	0.565507
hsa-mir-542	8.08721	8.02625	7.74804	7.56261	7.41795	7.13481	6.40235	7.35192	7.61947	6.74061	6.54978	6.90919	7.65153	7.2541	7.85463	6.99364	7.03969	7.07474	6.58988	6.96353	5.86073	7.12862	4.4864	6.95301	6.88588	7.60257	8.37585	7.59889	6.16932	6.10827	7.43806	6.69988	7.65024	6.87401	8.90265	6.04681	7.27898	5.96467	7.36776	6.77897	7.41361	6.86385	7.78519	7.33469	7.31076	6.83355	5.6897	6.17967	7.76605
hsa-mir-543	1.91378	1.48964	2.10277	1.62373	1.29984	1.57064	0.755571	1.58355	1.44695	0	2.00073	1.11104	1.13385	1.6085	0	0.634248	1.16072	0.856743	1.06313	2.03732	0.851499	1.15673	1.29873	0.990691	1.09412	1.26985	0	0.495159	1.3574	0.871148	0.983867	1.06317	0.59822	0.608844	2.89714	1.48701	0.958431	0.870418	0.766222	1.30869	1.4036	1.38061	1.589	0.732515	0.678643	1.26229	1.20025	0.517984	2.4112
hsa-mir-544a	0	0	0.286513	0	0	0.237715	0	0	0	0	0	0.367374	0	0	0	0.351701	0	0	0	0	0	0.691319	0.980694	0	0	0	1.42977	0	0	0	0.724074	0	0	0	0	0	0	0	0.232909	0	0	0	0	0	0	0.114074	0	0	0
hsa-mir-544b	0	0	0	0	0	0	0	0	0	0	0	0	0	0	0	0	0	0	0	0	0	0.691319	0	0	0	0	0	0	0	0	0	0	0	0	0.220789	0	0	0	0	0	0	0	0.290608	0	0	0	0	0	0.310287
hsa-mir-545	0.691626	0.538086	0.525446	0.760351	0	0.237715	0	0.484822	0.655751	1.18672	0	0.659931	0.675559	0	0.726588	0	0	0.856743	1.06313	0	0	0	0	0.990691	0.462865	1.26985	1.82418	0	0.739437	0.871148	0.983867	1.39741	0.59822	0.837988	1.10942	0.263444	1.0921	0.412811	0.907669	0.577625	0.578873	0.341756	1.08119	0.412258	0.485863	0	0.657	0.898329	0.565507
hsa-mir-548a-1	0	0	0	0	0	0	0	0	0	0	0	0	0	0	0	0	0	0	0	0	0	0	0	0	0	0	0	0	0	0	0	0	0	0	0	0	0	0	0	0	0	0	0	0	0	0	0	0	0
hsa-mir-548a-2	0	0	0	0	0	0	0	0	0	0	0	0	0	0	0	0	0	0	0	0	0	0	0	0	0	0	0	0	0	0	0	0	0	0	0	0	0	0	0	0	0	0	0	0	0	0	0	0	0
hsa-mir-548a-3	0	0	0.525446	0	0	0	0	0	0	0	0	0.367374	0	0	0	0	0	0	0	0	0	0.691319	0	0	0	0.770352	0	0	0	0	0	0	0	0	0.220789	0	0	0	0	0.135506	0	0	0	0	0.263288	0	0	0	0.310287
hsa-mir-548aa-1	0	0	0	0	0	0	0	0	0	0	0	0	0	0	0	0	0	0	0	0	0	0	0	0	0	0	0	0	0	0	0	0	0	0	0	0	0	0	0	0	0	0	0	0	0	0	0	0	0
hsa-mir-548aa-2	0	0	0	0	0	0	0	0	0	0	0	0	0	0	0	0	0	0	0	0	0	0	0	0	0	0	0	0	0	0	0	0	0	0	0	0	0	0	0	0	0	0	0	0	0	0	0	0	0
hsa-mir-548ab	0	0	0	0	0	0	0	0	0	0	0	0	0	0	0	0	0	0	0	0	0	0	0	0	0	0	0	0	0	0	0	0	0	0	0	0.263444	0	0	0	0	0	0	0	0	0	0	0	0	0
hsa-mir-548ac	0	0	0	0	0	0	0	0	0	0	0	0	0	0	0	0	0	0	0	0	0	0	0	0	0	0	0	0	0	0	0	0	0	0	0	0	0	0	0	0	0	0	0	0	0	0	0	0	0
hsa-mir-548ad	0	0	0	0	0	0	0	0	0	0	0	0	0	0	0	0	0	0	0	0	0	0	0	0	0	0	0	0	0	0	0	0	0	0	0	0	0	0	0	0	0	0	0	0	0	0	0	0	0
hsa-mir-548ae-1	0	0	0	0	0	0	0	0	0	0	0	0	0	0	0	0	0	0	0	0	0	0	0	0	0	0	0	0	0	0	0	0	0	0	0	0	0	0	0	0	0	0	0	0	0	0	0	0	0
hsa-mir-548ae-2	0	0	0	0	0	0	0	0	0	0	0	0	0	0	0	0	0	0	0	0	0	0	0	0	0	0	0	0	0	0	0	0	0	0	0	0	0	0	0	0	0	0	0	0	0	0	0	0	0
hsa-mir-548ag-1	0	0	0	0	0	0	0	0	0	0	0	0	0	0	0	0	0	0	0	0	0	0	0	0	0	0	0	0	0	0	0	0	0	0	0	0	0	0	0	0	0	0	0	0	0	0	0	0	0
hsa-mir-548ag-2	0.386867	0	0	0	0.273647	0	0.111221	0	0.655751	0	0	0	0	0	0	0	0.497633	0	0	0	0	0	0	0	0	0	0	0	0	0	0	0	0	0	0	0.486129	0	0.221121	0	0	0	0	0	0.412258	0	0	0	0	0.565507
hsa-mir-548ah	0	0	0	0	0	0	0	0	0	0	0	0	0	0	0	0	0	0	0	0	0	0	0	0	0.462865	0	0	0	0	0	0	0	0	0.336305	0	0	0	0	0	0	0	0	0	0	0	0	0	0	0
hsa-mir-548ai	0.386867	0.538086	0	0.760351	0	0	0	0	0	0	0	0	0	0	0	0	0	0	0	0	0	0	0	0	0	0	0	0.495159	0	0.500352	0.406994	0	0	0	0	0	0	0	0.232909	0	0	0	0	0	0	0	0	0	0
hsa-mir-548aj-1	0	0	0	0	0	0	0	0	0	0	0	0	0	0	0	0	0	0	0	0	0	0	0	0	0	0	0	0	0	0	0	0	0	0	0	0	0	0	0	0	0	0	0	0	0	0	0	0	0
hsa-mir-548aj-2	0	0	0	0	0	0	0	0	0	0	0	0	0	0	0	0	0	0	0	0	0	0	0	0	0	0	0	0	0	0	0	0	0	0	0	0	0	0	0	0	0	0	0	0	0	0	0	0	0
hsa-mir-548ak	0	0	0	0	0	0	0	0	0	0	0	0	0	0	0	0	0	0	0	0	0	0	0	0	0	0	0	0	0	0	0	0	0	0	0	0	0	0	0	0	0	0	0	0	0	0	0	0	0
hsa-mir-548al	0	0	0	0	0	0	0	0	0.655751	0	0	0	0	0	0	0	0	0.856743	0	0	0	0.691319	0.572121	0.578763	0	0	0	0	0	0	0	0	0	0	0	0	0	0	0	0	0	0	0	0	0	0	0	0	0
hsa-mir-548am	0	0	0	0	0	0	0	0	0	0	0	0	0	0	0	0	0	0	0	0	0	0	0	0	0	0	0	0	0	0	0	0	0	0	0	0	0	0	0	0	0	0	0	0	0	0	0	0	0
hsa-mir-548an	0	0	0	0	0	0	0	0	0	0	0	0	0	0	0	0	0	0	0	0	0	0	0	0	0	0	0	0	0	0	0	0	0	0	0	0	0	0	0	0	0	0	0	0	0	0	0	0	0
hsa-mir-548ao	0	0	0	0	0	0	0	0	0	0	0	0	0	0	0	0	0	0	0	0	0	0	0	0	0	0	0	0	0	0	0	0	0	0	0	0	0	0	0	0	0	0	0	0	0	0	0	0	0
hsa-mir-548ap	0	0	0	0	0	0	0	0	0	0	0	0	0	0	0	0	0	0	0	0	0	0	0	0	0	0	0	0	0	0	0	0	0	0	0	0	0	0	0	0	0	0	0	0	0	0	0	0	0
hsa-mir-548aq	0	0	0	0	0	0	0	0.262681	0	0	0	0	0	0	0	0	0	0	0	0	0	0	0	0	0	0	0	0	0.290631	0	0	0	0	0	0.220789	0	0	0	0	0	0.219786	0	0	0	0	0	0	0	0
hsa-mir-548ar	0	0	0	0	0	0	0	0	0	0	0	0	0	0	0.726588	0	0	0	0	0	0	0.691319	0	0	0	0	0	0	0	0	0.406994	0	0	0	0	0	0	0.221121	0.433392	0	0	0	0.290608	0	0	0	0.194339	0	0.310287
hsa-mir-548as	0	0	0	0	0	0	0	0	0	0	0	0	0	0	0	0	0	0	0	0	0	0	0	0	0	0	0	0	0	0	0	0	0	0	0	0	0	0	0	0	0	0	0	0	0	0	0	0	0
hsa-mir-548at	0	0	0	1.02917	0	0	0	0.262681	0	0	0	0	0	0	0	0	0.497633	0	0	0	0	0	0	0	0	0	0	0	0.290631	0	0	0	0	0.336305	0	0.263444	0	0	0.433392	0	0.219786	0	0	0	0	0.114074	0	0.282115	0
hsa-mir-548au	0.386867	0	0.525446	1.45141	0.273647	0.441747	0.126884	0.262681	0.655751	0.712084	0.459696	0	1.13385	0	1.20754	0.351701	0.497633	1.7794	1.06313	0.473115	0.851499	2.70771	0.572121	0	1.53176	0.770352	1.42977	0.495159	0.532417	1.16586	0.983867	1.06317	0	1.36464	0.220789	0	0.811106	0.221121	1.03648	0.373436	0	0.341756	0.290608	0.412258	0	0.219784	0.194339	0.282115	0.565507
hsa-mir-548av	0	0	0	0	0	0	0	0	0	0	0	0	0	0	0	0	0	0	0	0	0	0	0	0	0.462865	0	0	0	0	0	0	0	0	0	0	0	0	0	0	0	0	0	0	0	0	0	0	0.282115	0
hsa-mir-548aw	0.386867	0.538086	0	0.760351	0.273647	0.237715	0.3514	0.484822	0.655751	0	0	0.367374	0	0	0	0.634248	0	0	0.627355	0.473115	0	0	0.572121	0.578763	0.462865	0	0	0.495159	0	0.871148	0	0	0.59822	0.608844	0.220789	0	0.811106	0.995543	0	0.479139	0.219786	0	0	0.732515	0	0.114074	0.518636	0.282115	0.310287
hsa-mir-548ax	0	0	0	0	0	0	0	0	0	0	0	0	0	0	0	0	0	0	0	0	0	0	0	0	0	0	0	0	0	0	0	0	0	0	0.220789	0	0.249311	0.221121	0	0	0	0	0	0	0	0	0	0	0
hsa-mir-548ay	0.386867	0	0	0.429697	0	0	0	0	0	0	0	0	0	0	0.726588	0	0	0	0	0	0	0	0	0	0.462865	0	0	0	0	0	0	0	0	0	0.220789	0	0	0	0	0	0	0.341756	0	0.412258	0.263288	0	0	0	0
hsa-mir-548az	0	0	0	0	0.503572	0.237715	0	0	0	0	0	0	0	0	0	0	0	0	0	0	0	1.15673	0	0	0	0	0	0.863107	0	0.500352	0	0	0.59822	0.336305	0	0	0	0	0	0	0	0	0	0	0	0	0	0	0.310287
hsa-mir-548b	1.50858	0	0.286513	0	0.876125	0.441747	0.755571	0	0	0	0	0.367374	0	0.751135	0.726588	0	0	0	0	0.473115	1.38336	1.15673	0	1.31075	1.86708	2.73237	0	0.863107	0.532417	0.871148	1.71433	0.627385	0.59822	0.336305	0.99438	0.263444	2.31075	0.870418	0	0.135506	0.990857	0.617859	2.26112	1.57754	0.263288	0.729651	1.28806	0.720654	0
hsa-mir-548ba	0	0	1.06932	0	0	0	0.832066	0.484822	0.655751	0	1.70111	0	0	0	0	1.6819	1.40467	0	0	0	0	0	0	0	1.09412	0	0	0	0.290631	1.96418	0	0	0	0	0	0.263444	0	1.40946	1.03648	0.577625	1.31095	1.04907	0.290608	0.412258	0.485863	1.04938	1.37083	0.282115	0.782292
hsa-mir-548bb	0	0	0	0	0	0	0	0	0	0	0	0	0	0	0	0	0	0	0	0	0	0	0	0	0	0	0	0	0	0	0	0	0	0	0	0	0	0	0	0	0	0	0	0	0	0	0	0	0
hsa-mir-548c	0	0	0	0	0	0	0	0	0	0	0	0	0	0	0	0	0	0	0	0	0	0	0	0	0	0	0	0	0	0	0	0	0	0	0	0	0	0	0	0	0	0	0	0	0	0	0	0	0
hsa-mir-548d-1	0	0	0.730372	0.429697	0.273647	1.38522	0	0.262681	0.655751	0	0	0	0.675559	0.751135	0	0.351701	0	0	0	0	0	0	0	0.578763	0.812745	1.26985	0.885202	0	0	0	0	0.627385	0	0.837988	0.869361	0	0.249311	0.221121	0.609383	0	0	0	0.290608	0	0	0	0	0.720654	0.782292
hsa-mir-548d-2	0.943099	0	0.286513	0.429697	0.273647	0.922669	0	0	0.655751	0	0	0	0	0.751135	0	0.351701	0.497633	0.856743	0.627355	0	1.38336	2.02637	0	0	0.462865	0	0	0	0.290631	0	0	0.627385	0	0.336305	0.41223	0	0.249311	0	0.433392	0	0	0	0.290608	0	0	0	0	0	0.310287
hsa-mir-548e	1.91378	0.293986	0.525446	1.45141	0.273647	0.237715	0.803112	0.262681	0	0	0.807771	0	1.13385	0.751135	1.56762	0.634248	0.497633	0.856743	0	0	0	1.15673	0.572121	1.31075	1.09412	0.770352	0.885202	0	0.532417	0	0.406994	0.627385	0	0.608844	0.581218	0	0.46182	0	0.609383	0.135506	0.578873	0.617859	1.22585	0.732515	0	0.318275	0.194339	0.282115	0
hsa-mir-548f-1	0.386867	0	0	0.760351	0.273647	1.38522	0.111221	0.677277	0	1.54325	0	0	0.675559	0.751135	0	0.634248	0.497633	1.39061	0.627355	0	0	1.79037	0	2.79136	1.32947	0.770352	0	0	0.532417	2.36334	2.38873	0	0	0	0.581218	0	0	0	0	0	0.219786	0	1.69223	0	0	0	0	0.720654	0.782292
hsa-mir-548f-2	0	0	0	0	0	0	0	0	0	0	0	0	0	0	0	0	0	0	0	0	0	0	0	0	0	0	0	0	0	0	0	0	0	0	0	0	0	0	0	0	0	0	0	0	0	0	0	0	0
hsa-mir-548f-3	0	0	0	0	0	0	0	0	0	0	0	0	0	0	0	0	0	0	0	0	0	0	0	0	0	0	0	0	0	0	0	0	0	0	0	0	0	0	0	0	0	0	0	0	0	0	0	0	0
hsa-mir-548f-4	0	0	0	0	0	0	0	0	0	0	0	0	0	0	0	0	0	0	0	0	0	0	0	0	0	0	0	0	0	0	0	0	0	0	0	0	0	0	0	0	0	0	0	0	0	0	0	0	0
hsa-mir-548f-5	0	0	0	0	0	0	0	0	0	0	0	0	0	0	0	0	0	0	0	0	0	0	0	0	0	0	0	0	0	0	0	0	0	0	0	0	0	0	0	0	0	0	0	0	0	0	0	0	0
hsa-mir-548g	0	0	0	0	0	0	0	0	0	0	0	0	0	0	0	0	0	0	0	0	0	0	0	0	0	0	0	0	0	0	0	0	0	0	0	0	0	0	0	0	0	0	0	0	0	0	0	0	0
hsa-mir-548h-1	0	0	0	0	0	0	0	0	0	0	0	0	0	0	0	0	0	0	0	0	0	0	0	0	0	0	0	0	0	0	0	0	0	0	0	0	0	0	0	0	0	0	0	0	0	0	0	0	0
hsa-mir-548h-2	0	0	0	0	0	0	0	0	0	0	0	0	0	0	0	0	0	0	0	0	0	0	0	0	0	0	0	0	0	0	0	0	0	0	0	0	0	0	0	0	0	0	0	0	0	0	0	0	0
hsa-mir-548h-3	0	0	0	0	0	0	0	0	0	0	0	0	0	0	0	0	0	0	0	0	0	0	0	0	0	0	0	0	0	0	0	0	0	0	0	0	0	0	0	0	0	0	0	0	0	0	0	0	0
hsa-mir-548h-4	0	0	0	0	0	0	0	0	0	0	0	0	0	0	0	0	0	0	0	0	0	0	0	0	0	0	0	0	0	0	0	0	0	0	0	0	0	0	0	0	0	0	0	0	0	0	0	0	0
hsa-mir-548h-5	0	0	0	0	0	0	0	0	0	0	0	0	0	0	0	0	0	0	0	0	0	0	0	0	0	0	0	0	0	0	0	0	0	0	0	0	0	0	0	0	0	0	0	0	0	0	0	0	0
hsa-mir-548i-1	0	0	0	0	0	0	0	0	0	0	0	0	0	0	0	0	0	0	0	0	0	0	0	0	0	0	0	0	0	0	0	0	0	0	0	0	0	0	0	0	0	0	0	0	0	0	0	0	0
hsa-mir-548i-2	0	0	0	0	0	0	0	0	0	0	0	0	0	0	0	0	0	0	0	0	0	0	0	0	0	0	0	0	0	0	0	0	0	0	0	0	0	0	0	0	0	0	0	0	0	0	0	0	0
hsa-mir-548i-3	0	0	0	0	0	0	0	0	0	0	0	0	0	0	0	0	0	0	0	0	0	0	0	0	0	0	0	0	0	0	0	0	0	0	0	0	0	0	0	0	0	0	0	0	0	0	0	0	0
hsa-mir-548i-4	0	0	0	0	0	0	0	0	0	0	0	0	0	0	0	0	0	0	0	0	0	0	0	0	0	0	0	0	0	0	0	0	0	0	0	0	0	0	0	0	0	0	0	0	0	0	0	0	0
hsa-mir-548j	0.386867	0.538086	0.730372	0.760351	0.273647	0.237715	0.413983	0.484822	0	0	0	0	0	0.751135	1.20754	0.351701	0.497633	0	0	0	0	0.691319	0	0.578763	0.812745	0	0	0	0.290631	0.871148	0	0	0	0.608844	0.581218	0	0.811106	0	0.907669	0.25937	0	0	0.739388	0.412258	0.263288	0	0	0.282115	0.565507
hsa-mir-548k	0.691626	0.293986	0	0	0.273647	0	0.126884	0	0	0.712084	0	0.367374	0	0	0.726588	0	0	0	0	0	0	1.15673	0	0.578763	0.462865	0	0	1.15603	0	0	0	0	0	0.608844	0.581218	0	1.21442	0.412811	0	0.373436	0	0	0	0.412258	0.263288	0	0	0.517984	0
hsa-mir-548l	0.386867	0	0	0	0.503572	0.441747	0	0	0	0	0	0	0	0	0.726588	0	0	0	0	0	0	0.691319	0	0.578763	0	0	0	0	0.532417	0	0.406994	0.627385	0	0.336305	0	0	0	0	0.433392	0	0.219786	0	0.290608	0	0.263288	0	0	0	0
hsa-mir-548m	0	0	0	0	0	0	0	0	0	0	0	0	0	0	0	0	0	0	0	0	0	0	0	0	0	0	0	0	0	0	0	0	0	0	0	0	0	0	0	0	0	0	0	0	0	0	0	0	0
hsa-mir-548n	0.386867	0	0.525446	0	0	0	0.126884	0.262681	0	0	0	0	0	0	0.726588	0.351701	0	0	0	0	0	0	0	0	0.462865	0	0	0	0	0	0.406994	0	0	0	0	0	0	0	0.232909	0	0	0	0	0	0	0	0	0.282115	0
hsa-mir-548o	1.15718	0.293986	0.525446	0	0.503572	0.237715	0.439294	0.262681	0.655751	0.712084	0.459696	0.659931	0	0	0	0.870418	0.497633	0	1.06313	0	0	0.691319	0	1.31075	0.462865	0	0.885202	0.863107	0	0	0.983867	0	1.01984	0.336305	0.581218	0.263444	1.21442	0	0	0.373436	0.219786	0	0.290608	0.732515	0.485863	0	0.194339	0	0.782292
hsa-mir-548o-2	1.15718	0	0.286513	0.760351	0.273647	0.441747	0.111221	0.262681	0	0.712084	0.459696	0	0.675559	0.751135	1.56762	0.351701	0	0	0.627355	0	0	0	0	0	0.462865	1.26985	0	0.495159	0.532417	0	0.406994	0	1.01984	0.336305	0.581218	0.486129	0.958431	0.221121	0.433392	0.25937	0.219786	0.341756	0.290608	0.412258	0	0	0.194339	0.720654	0.310287
hsa-mir-548p	0	0	0	0	0	0	0.126884	0	0	0	0	0	0	0	0	0	0	0	0	0	0	0	0	0	0	0	0	0	0	0	0	0	0	0	0	0	0	0	0	0	0	0	0	0	0	0	0	0	0
hsa-mir-548q	0.386867	0.293986	0.286513	1.02917	0	0.441747	0.229065	0	0	0	0	0	0	0	0	0.351701	0	0	0	0.828799	0	0	0.572121	0	0	0	0	0	0	0	0.724074	0	0.59822	0.608844	1.10942	0.678994	0.249311	0	0.433392	0.373436	0.729655	0.341756	0	0.994435	0	0.578869	0.518636	0.282115	0
hsa-mir-548s	0	1.23642	1.06932	1.77764	0	0.237715	0	0.677277	0.655751	0	0.459696	0	1.99497	0	1.56762	0.634248	0	0.856743	0.627355	0	2.32823	2.40689	1.29873	0.578763	1.70914	0	1.42977	1.15603	0.532417	0.871148	0	0	0.59822	0.336305	0.581218	0.678994	1.6206	0	1.36559	0.135506	0.219786	0.849514	1.35732	0.412258	0	0.114074	0.365581	0.720654	1.42206
hsa-mir-548t	0.691626	0.746801	0.909778	0	0	0.620465	0.126884	0.677277	0	0	0	0	0	0	0	0	0	0.856743	0	0	0	0.691319	0	0	1.32947	0.770352	0.885202	0.495159	0	0	0	0	0	0.336305	0.581218	0.486129	0	0	0	0	0.410474	0	0.290608	0	0	0	0.518636	0	0.310287
hsa-mir-548u	0.386867	0	0	0	0	0	0	0	0	0	0	0	0	0	0	0	0	0	0	0	0.851499	0.691319	0	0	0	0	0	0	0	0	0	0	0	0	0	0	0	0	0	0	0	0	0	0	0	0	0	0	0
hsa-mir-548v	0.386867	2.05808	2.79319	0.760351	1.03161	0.620465	0.126884	1.92444	2.15465	3.00358	1.32251	1.11104	1.7608	2.35013	2.64103	2.01318	1.7955	3.3104	1.66854	2.92557	1.38336	4.60649	0.572121	2.56941	2.25784	2.17901	2.13359	2.0962	1.08125	1.16586	2.97165	1.66859	1.83562	4.40694	1.49522	0.84909	1.70649	0.412811	1.85919	0	0.729655	0.849514	3.21051	1.72917	0	0.114074	0.518636	0.898329	0.782292
hsa-mir-548w	0	0	0	0	0	0	0	0	0	0	0	0	0	0	0	0	0	0	0	0	0	0	0	0	0	0	0	0	0	0	0	0	0	0	0	0	0	0	0	0	0	0	0	0	0	0	0	0	0
hsa-mir-548x	0	0	0	0	0	0	0	0	0	0	0	0	0	0	0	0	0	0	0	0	0	0	0	0.578763	0	0	0	0	0	0	0	0	0	0	0	0	0	0	0	0	0	0	0	0	0	0	0	0.282115	0
hsa-mir-548x-2	0	0	0	0	0	0	0	0	0	0	0	0	0	0	0	0	0	0	0	0	0	0	0	0	0	0	0	0	0	0	0	0	0	0	0	0	0	0	0	0	0	0	0	0	0	0	0	0	0
hsa-mir-548y	0	0	0	0	0	0	0	0	0	0	0	0	0	0	0	0	0	0	0	0	0	0	0	0	0	0	0	0	0	0	2.09058	0	0	0	0	0.263444	0	0	0	0	0	0	0	0.412258	0	0	0	0	0
hsa-mir-548z	0	0	0	0	0	0	0	0	0	0	0	0	0	0	0	0	0	0	0	0	0	0	0	0	0	0	0	0	0	0	0	0	0	0	0	0	0	0	0	0	0	0	0	0	0	0	0	0	0
hsa-mir-549a	0	0.538086	1.46337	1.02917	0.503572	0.237715	0.3514	0.677277	0	2.06724	0.459696	0	1.7608	0.751135	0	0	0.497633	0	0.627355	0.473115	1.77109	1.15673	0	0.990691	0	0	0	0.863107	0.532417	0.500352	0	2.26704	1.01984	0	0	0.263444	0.647008	0	0	0.25937	0.219786	0	0	0	0	0	0	0.720654	0.310287
hsa-mir-550a-1	1.91378	1.48964	3.15523	4.25107	1.80996	1.57064	1.02322	1.76404	1.44695	3.31243	1.32251	0.659931	2.5305	0.751135	3.03596	1.6819	2.35585	3.52886	2.56134	1.55607	2.07639	3.97766	1.7797	3.23123	2.56501	3.70007	4.09537	2.83636	2.81265	1.96418	2.77959	1.06317	3.12229	3.06187	1.79932	2.26498	2.99632	1.11068	4.29068	2.46728	1.72415	1.04907	2.38956	2.21364	0.485863	1.10562	2.2032	3.61244	3.43804
hsa-mir-550a-2	2.77473	0.929102	3.22469	4.51462	0.876125	1.48091	1.43272	1.67661	0.655751	3.78276	1.85868	0.659931	2.8016	1.90013	3.03596	1.80098	2.35585	3.3104	1.66854	1.73492	1.38336	4.23481	0.980694	2.56941	2.8935	3.53422	4.02205	2.91679	2.66816	2.85168	2.91043	1.66859	2.02966	3.06187	2.05034	2.32389	3.03003	0.733401	4.30354	2.18435	1.49066	1.38061	3.0252	1.57754	0.263288	1.21193	1.66129	2.98391	3.53081
hsa-mir-550a-3	2.13194	0.538086	2.8382	3.27408	0.701841	1.1724	0.622749	1.37721	1.44695	0.712084	1.08798	0.367374	1.48111	0.751135	1.85554	0.870418	1.40467	2.08535	1.06313	0.828799	2.54257	2.56513	1.7797	1.57254	1.09412	2.17901	3.36699	1.95097	1.22592	1.80213	1.20394	1.06317	2.73386	1.50469	1.65527	0.84909	2.73534	0.995543	2.83432	0.988978	0.990857	1.38061	1.96385	1.72917	0	0.578869	1.52336	1.32874	2.27479
hsa-mir-550b-1	0	0	0	0	0	0	0	0	0	0.712084	0	0	0	0	0	0	0	0	0	0	0	0	0	0.578763	0	0	0	0	0	0	0	0	0.59822	0	0	0	0.249311	0	0.766222	0	0	0	0	0	0	0	0	0	0
hsa-mir-550b-2	0	0	0	0	0	0	0	0	0	0	0	0	0	0	0	0	0	0	0	0	0	0	0	0	0	0	0	0	0	0	0	0	0	0	0	0	0	0	0	0	0	0	0	0	0	0	0	0	0
hsa-mir-551a	0.691626	0	1.67667	1.25569	0.701841	0	0	0.262681	1.10492	2.88395	0.459696	0	0.675559	2.35013	0.726588	0.870418	0.86694	3.80479	1.06313	0	0	2.02637	0	1.57254	4.25982	6.28392	0.885202	1.39939	0.290631	0.500352	2.29603	2.42172	1.01984	2.22505	0.869361	0.486129	0.958431	0.412811	0.609383	0.135506	0	0	1.96385	0	0	0	0.783247	1.0565	4.03184
hsa-mir-551b	2.48884	0.929102	1.94709	1.45141	0.273647	0.237715	0.886421	0.677277	0.655751	1.54325	0	0.367374	1.7608	0.751135	1.20754	1.25116	2.75842	0	1.06313	0.828799	0	0.691319	0	0	1.32947	0.770352	1.42977	0.863107	0.290631	1.80213	1.85094	0.627385	0	1.36464	1.79932	2.85011	2.13603	2.76497	2.64526	1.83205	1.57276	4.30092	1.87887	3.53413	0.263288	0.41047	2.52572	1.0565	0.565507
hsa-mir-552	6.15222	6.45231	0.525446	0.429697	1.03161	8.34604	1.38793	5.12722	0.655751	4.50448	6.24888	0	0.675559	5.96533	0	0.634248	1.61328	0.856743	0.627355	5.69604	5.42047	5.01581	0.572121	5.9703	0.462865	0.770352	0	5.12873	1.22592	0.871148	4.85943	0	7.46964	0	6.62548	1.13884	0	0.581993	2.33046	5.20343	2.30727	0.341756	0.290608	0	7.41091	0.219784	0.518636	5.76411	1.13735
hsa-mir-553	0	0	0	0	0	0	0	0	0	0	0	0	0	0	0	0	0	0	0	0	0	0	0	0	0	0	0	0	0	0	0	0	0	0	0	0	0	0	0	0	0	0	0	0	0	0	0	0	0
hsa-mir-554	0	0	0	0	0	0	0	0	0	0	0	0	0	0	0	0	0	0	0	0	0	0	0	0	0	0	0	0	0	0	0	0	0	0	0	0	0	0	0	0	0	0	0	0	0	0	0	0	0
hsa-mir-555	0.386867	0	0	0	0.273647	0.237715	0	0	0	0	0	0	0	0	0	0	0	0	0	0.473115	0.851499	0	0	0	0	0	0	0	0	0	0	0	0	0	0	0	0	0	0	0	0	0	0	0	0	0	0	0	0
hsa-mir-556	2.40755	0.538086	0.909778	1.45141	0.503572	1.28273	0.229065	0.484822	0	2.06724	0.459696	0	1.13385	0.751135	1.20754	0	0	2.08535	0.627355	0.473115	1.77109	3.06645	0	0.578763	2.36766	0.770352	2.38822	1.39939	0.920445	0.871148	1.20394	0.627385	2.02966	1.36464	1.65527	0.678994	2.31075	0.581993	0.907669	0.135506	0	0.341756	0	1.99164	0.263288	0.114074	0.783247	1.19903	1.28672
hsa-mir-557	0	0	0	0	0	0	0	0	0	0	0	0	0	0	0	0	0	0	0	0	0	0	0	0	0	0	0	0	0	0	0	0	0	0	0	0	0	0	0	0	0	0	0	0	0	0	0	0	0
hsa-mir-5571	0	0.293986	0.286513	0	0.503572	0.237715	0.510245	0	1.44695	0.712084	0	0.659931	0	0	0	0	0	0	0.627355	0	0	0.691319	0	1.31075	0	2.17901	0.885202	0.495159	0.532417	0	0.724074	0.627385	0	0	0.581218	0.486129	0.811106	0.581993	0	0	0.729655	1.04907	0	0.732515	0.263288	0.219784	0.657	0.898329	0.970717
hsa-mir-5572	0	0	0	0	0	0	0	0	0	0	0	0	0	0	0	0	0	0	0	0	0	0	0	0	0	0	0	0	0	0	0	0	0	0	0	0	0	0	0	0	0	0	0	0	0	0	0	0	0
hsa-mir-5579	0.386867	0	0	0.429697	0	0	0	0	0	0	0.459696	0	0	0.751135	0.726588	0	0	0	0	0	0	0	0	0	0	0	0	0	0	0	0	0	0	0.336305	0.220789	0.263444	0.46182	0	0	0.373436	0	0	0.739388	0	0	0.114074	0	0.282115	0.310287
hsa-mir-558	0	0	0	0	0	0	0	0	0	0	0	0	0	0	0	0	0	0	0	0	0	0	0	0	0	0	0	0	0	0	0	0	0	0	0	0	0	0	0	0	0	0	0	0	0	0	0	0	0
hsa-mir-5580	0.691626	0.293986	0.730372	0	0	0.620465	0	0.262681	0	0	0.459696	0	0	0	0	0	0	1.39061	0.627355	0	1.77109	1.15673	0	0	0.812745	0.770352	0.885202	0	1.58908	1.16586	0	0.627385	1.01984	0.837988	0	0.84909	0.249311	0.221121	0	0	0	0	0	0	0.263288	0	0.194339	0	0.782292
hsa-mir-5581	0	0	0.730372	1.02917	0	0.237715	0	0	0.655751	0	0	0	1.13385	0	0.726588	0.351701	0	0.856743	0.627355	0	0	0.691319	0	0.578763	0.462865	1.26985	0.885202	0.495159	0.290631	0.500352	0.406994	0	0.59822	1.36464	0.581218	0.263444	0.647008	0.412811	0.766222	0.135506	0.410474	0	0.739388	0.412258	0	0.219784	0.194339	0.282115	0.565507
hsa-mir-5582	0.386867	0.293986	0.909778	0	0.503572	0.237715	0.126884	0	0	0	0	0	0	0	1.56762	0	0	0	0	0.473115	0	1.15673	0	0	0.462865	0	0	0	0	0	0	0	0	0	0	0	0	0	0.232909	0.135506	0	0	1.08119	0	0.263288	0	0	0.282115	0.782292
hsa-mir-5583-1	0	0	0	0	0	0	0	0	0	0	0	0	0	0	0	0	0	0	0	0	0	0	0	0	0	0	0	0	0	0	0	0	0	0	0	0	0	0	0	0	0	0	0	0	0	0	0	0	0
hsa-mir-5583-2	0	0	0	0	0	0	0	0	0	0	0	0	0	0	0	0	0	0	0	0	0	0	0	0	0	0	0	0	0	0	0	0	0	0	0	0	0.249311	0	0	0	0	0	0	0	0	0	0	0	0
hsa-mir-5584	0	0	0	0	0	0	0	0	0	0	0	0	0	0	0	0	0	0	0	0	0	0	0	0	0	0	0	0	0	0	0	0	0	0	0	0	0	0	0	0	0	0	0	0	0	0	0	0	0
hsa-mir-5585	0	0	0	0	0	0	0	0	0	0	0	0	0	0	0	0	0.497633	0	0	0	0	0	0	0	0	0	0.885202	0	0	0	0	0	0	0	0	0	0	0	0	0.135506	0	0	0	0	0	0	0	0	0
hsa-mir-5586	0	1.23642	2.30871	3.42151	1.41731	1.38522	1.78919	0.677277	2.62736	1.82891	0.807771	1.29279	1.99497	0	3.52049	1.40946	2.35585	2.5523	1.89672	1.35186	1.77109	1.79037	0	2.307	0.812745	1.26985	2.60458	0.863107	0.532417	1.96418	1.85094	0.627385	0.59822	1.85806	2.21355	0.486129	1.6206	0.870418	2.79844	1.6629	1.57276	0.617859	3.13922	0.994435	1.8491	1.57275	0.518636	1.84467	1.42206
hsa-mir-5587	0	0	0	0	0	0.237715	0	0	0	0	0	0	0	0	0	0	0	0	0	0	0	0	0	0	0	0	0	0	0	0	0	0	0	0	0	0	0	0	0	0	0	0	0	0	0	0	0	0	0
hsa-mir-5588	0	0	0.286513	0.429697	0	0	0	0.262681	0	0	0	0.367374	0.675559	0	0	0	0	0	0	0	0	1.15673	0	0.578763	0	0	0	0	0.290631	0	0	0	0	0	0	0	0.647008	0.221121	0.433392	0.479139	0	0	0.532378	0	0	0.114074	0	0	0
hsa-mir-5589	4.18768	0	3.5564	0.429697	0.273647	0	0	1.13635	0.655751	0.712084	0	0.367374	0	0	0	0	0	0.856743	0	0	0	1.79037	0	2.98367	0	2.73237	0	0.495159	0.739437	0.500352	1.97573	0.627385	1.34571	0.336305	0	0	1.86431	0	0	0.135506	0.729655	0	0	0	0	0	0	3.36275	0
hsa-mir-559	0.691626	1.09093	0.286513	1.45141	1.17195	1.81054	0.338005	0.484822	0.655751	0	0	0	0	0	0	0	0	0.856743	0	0	0	1.15673	0	0	1.09412	0	0	0.495159	1.3574	0	0.406994	0	0.59822	1.03568	0.732472	0.678994	0.249311	0	0.766222	0	0.219786	0.341756	0.290608	0.994435	0	0.114074	0.518636	0.282115	1.76534
hsa-mir-5590	0	0	0	0	0	0	0	0	0	0	0	0	0	0	0	0	0	0	0	0	0	0	0	0	0	0	0	0	0	0	0	0	0	0	0	0	0	0	0	0	0	0	0	0	0	0	0	0	0
hsa-mir-5591	0	0	0	0	0	0	0	0	0	0	0	0	0	0	0	0	0	0	0	0	0	0	0	0	0	0	0	0	0	0	0	0	0	0	0	0	0	0	0	0	0	0	0	0	0	0	0	0	0
hsa-mir-561	0	0.746801	0	0.760351	0.701841	0	0.126884	0.998941	0.655751	1.82891	0.807771	0.367374	0.675559	1.24259	2.09545	1.07331	0	2.08535	2.09369	0	0	2.02637	0.572121	0	0.812745	0.770352	0.885202	0	1.3574	1.41047	0.406994	1.66859	1.01984	1.03568	0.41223	0	1.21442	0.733401	2.64526	0.373436	0.219786	0.617859	0.920387	0.412258	0.263288	0.114074	0.783247	0.282115	1.86374
hsa-mir-562	0	0	0	0	0	0	0	0	0	0	0	0	0	0	0	0	0	0	0	0	0	0	0	0	0	0	0	0	0	0	0	0	0	0	0	0	0	0	0	0	0	0	0	0	0	0	0	0	0
hsa-mir-563	0	0	0	0	0	0	0	0	0	0	0	0	0	0	0	0	0	0	0	0	0	0	0	0	0	0	0	0	0	0	0	0	0	0	0	0	0	0	0	0	0	0	0	0	0	0	0	0	0
hsa-mir-564	0	0	0	0	0	0	0	0	0	0	0	0	0	0	0	0	0	0	0.627355	0	0	0	0	0	0	0	0	0	0	0.500352	0	0	0.59822	0.608844	0	0	0.46182	0	0	0	0	0	0.290608	0	0	0	0.194339	0	0
hsa-mir-566	0	0	0	0	0	0	0	0	0	0	0	0	0	0	0	0	0	0	0	0	0	0	0	0	0	0	0	0	0	0	0	0	0	0	0	0	0	0	0	0	0	0	0	0	0	0	0	0	0
hsa-mir-567	0	0	0	0	0	0	0	0	0	0	0	0	0	0	0	0	0	0	0	0	0	0	0	0	0	0	0	0	0	0	0	0	0	0	0	0	0	0	0	0	0	0	0	0	0	0	0	0	0
hsa-mir-568	0	0	0	0	0	0	0	0	0	0	0	0	0	0	0	0	0	0	0	0	0	0	0	0	0	0	0	0	0	0	0	0	0	0	0	0	0	0	0	0	0	0	0	0	0	0	0	0	0
hsa-mir-5680	0	0	0.286513	0	0	0	0.229065	0	0	0	0.459696	0.659931	0	0	0.726588	0.351701	0	0	0	0.473115	0	0	0	0.578763	0	0	0	0	0.290631	0	0.406994	0	0	0.608844	0	0.678994	0	0.581993	0	0.25937	0	0	0	0.412258	0.263288	0.114074	0.194339	0	0.310287
hsa-mir-5681a	0	0	0	0	0	0	0	0	0	0	0	0	0	0	0	0	0	0	0	0	0	0	0	0	0	0	0	0	0	0	0	0	0	0	0	0	0	0	0	0	0	0	0	0	0	0	0	0	0
hsa-mir-5681b	0	0	0	0	0	0	0	0	0	0	0	0	0	0	0	0	0	0	0	0	0	0	0	0	0	0	0	0	0	0	0	0	0	0	0	0	0	0	0	0	0	0	0	0	0	0	0	0	0
hsa-mir-5682	0	0	0	0	0	0	0	0	0	0	0	0	0	0	0	0	0	0	0	0	0	1.15673	0.572121	0	0	0	0	0	0	0	0	0	0	0	0	0.263444	0	0	0	0.135506	0	0.341756	0	0	0	0	0	0	0
hsa-mir-5683	4.47385	0.293986	0.730372	1.62373	2.04715	3.53211	0.126884	0.677277	1.95501	0.712084	0	2.49571	1.48111	3.5765	0.726588	1.40946	3.69432	0	1.06313	1.11391	0	0	0	0.990691	2.6544	0	1.42977	0.863107	0.532417	2.47512	1.97573	1.66859	1.61136	1.20951	4.13234	3.10651	1.0921	1.49673	4.67403	1.30869	0.729655	0.617859	0.739388	0	0.263288	2.28308	2.48913	1.0565	0.310287
hsa-mir-5684	0.691626	0.929102	0.525446	0.429697	0.273647	0.620465	0.653323	0.484822	0	0	0	0	0	0.751135	0	0	0	0.856743	0.627355	0	0.851499	0	0	1.31075	0	0	0	1.60757	0	0	0.406994	1.06317	1.34571	0.608844	0.581218	0	0.647008	0	0.433392	0.25937	0	0.617859	0.532378	0.732515	0	0.114074	0.194339	0.898329	0.565507
hsa-mir-5685	0	0	0	0	0	0	0	0	0	0	0	0	0	0	0	0.351701	0	0	0	0	0	0	0	0	0	0	0	0	0	0	0	0	0	0	0	0	0	0	0	0	0	0	0	0	0	0	0	0	0
hsa-mir-5687	0	0.293986	0.525446	1.62373	0	0	0.3514	0	0.655751	0.712084	0	0.659931	0.675559	0	0	0.634248	0	0	0	0	0	0	0	0.990691	0.462865	0	0	0	0.290631	0	0	0	0	0	0.41223	0.678994	1.32718	0.581993	0.907669	0.135506	0.219786	0.341756	0.290608	0.732515	0	0.497126	0	0	0
hsa-mir-5688	0	0	0	0	0	0	0	0	0	0	0.459696	0	0	0	0	0	0	0	0	0	0	0	0	0	0	0	0	0	0	0	0	0	0	0	0	0	0	0	0	0	0	0	0	0	0	0	0	0	0
hsa-mir-5689	0	0	0	0	0	0	0	0	0	0	0	0	0	0	0	0	0	0	0	0	0	0	0	0	0	0	0	0	0	0	0	0	0	0	0	0	0	0	0	0	0	0	0	0	0	0	0	0	0
hsa-mir-569	0	0	0	0	0	0	0	0	0	0	0	0	0	0	0	0	0	0	0	0	0	0	0	0	0	0	0	0	0	0	0	0	0	0	0	0	0	0	0	0	0	0	0	0	0	0	0	0	0
hsa-mir-5690	0.386867	0	0.730372	0.429697	0	0.237715	0.229065	0.262681	0.655751	0	0	0	0	0	0.726588	0	0.86694	0	0	0	0.851499	1.15673	0	0.578763	0	0	0	0.495159	0.532417	0	0	0	0	0.336305	0	0.263444	0	0.221121	1.03648	0.25937	0	0.617859	0.290608	0	0	0.114074	0.194339	0.517984	0.782292
hsa-mir-5691	0	0	0	0	0	0.237715	0.229065	0	0	0	0	0	0	0	0	0	0	0	0	0	0	0	0	0	0	0	0	0	0	0	0	0	0.59822	0	0	0.263444	0	0	0	0	0	0	0	0	0	0	0	0	0
hsa-mir-5692a-1	0	0	0	0	0	0	0	0	0	0	0	0	0	0	0	0	0	0	0	0	0	0	0	0	0	0	0	0	0	0	0	0	0	0	0	0	0	0	0	0	0	0	0	0	0	0	0	0	0
hsa-mir-5692a-2	0	0	0	0	0	0	0	0	0	0	0	0	0	0	0	0	0	0	0	0	0	0	0	0	0	0	0	0	0	0	0	0	0	0	0	0	0	0	0	0	0	0	0	0	0	0	0	0	0
hsa-mir-5692b	0	0	0	0	0	0	0	0	0	0	0	0	0	0	0	0	0	0	0	0	0	0	0	0	0	0	0	0	0	0	0	0	0	0	0	0	0	0	0	0	0	0	0	0	0	0	0	0	0
hsa-mir-5692c-1	0	0	0	0	0	0	0	0	0	0	0	0	0	0	0	0	0	0	0	0	0	0	0	0	0	0	0	0	0	0	0	0	0	0	0	0	0.249311	0	0	0	0	0	0	0	0	0	0	0	0
hsa-mir-5692c-2	0	0	0	0	0	0	0	0	0	0	0	0	0	0	0	0	0	0	0	0	0	0	0	0	0	0	0	0	0	0	0	0	0	0	0	0	0	0	0	0	0	0	0.532378	0	0	0	0	0	0
hsa-mir-5693	0	0	0	0	0	0	0	0	0	0	0	0	0	0	0	0	0	0	0	0	0	0	0	0	0	0	0	0	0	0	0	0	0	0	0	0	0.249311	0	0	0	0	0	0	0	0	0	0	0	0
hsa-mir-5694	0	0	0	0	0	0	0	0	0	0	0	0	0.675559	0	0	0	0	0	0	0.473115	1.38336	0	2.66762	0	0	0	0	0	0	0.500352	0	0	0	0	0	0.263444	0	0	0	0.135506	0	0.341756	0	0	0	0	0	0	0.782292
hsa-mir-5695	0	0	0.286513	0.760351	0	0	0.126884	0	0	0	0	0	0	0	0	0	0	0	0	0	0	0	0	0	0.812745	0	0	0	0	0	0.724074	0	0	0	0	0	0	0	0.433392	0.25937	0	0	0.532378	0	0	0.114074	0	0	0.310287
hsa-mir-5696	0	0.293986	0.525446	0	0	0.779466	0.214479	0.484822	0	0	0	0	0	0.751135	0	0	0	0.856743	0.627355	0	0	0	0	0	0.462865	0	0	0.863107	0.290631	0	0	0	0.59822	0.608844	0	0.263444	0.46182	0.733401	0.609383	0.135506	0.410474	0	0.290608	0	0	0.497126	0.194339	0.517984	0.310287
hsa-mir-5697	0	0.293986	0	0.429697	0	0	0	0	0	0	0	0	0	0	0	0	0	0	0	0	0	0	0	0.578763	0	0.770352	0	0	0	0	0	0	0	0	0	0	0	0	0	0	0	0	0	0	0	0	0	0	0
hsa-mir-5698	0.691626	0.538086	2.79319	1.62373	0.876125	0.441747	0.439294	0.677277	1.44695	0	0	1.59933	0	0	1.56762	0.634248	0.497633	0	0	0.828799	0	1.15673	0	1.57254	1.32947	0.770352	0.885202	1.39939	0	0	0.983867	0.627385	0.59822	1.03568	0.581218	0	0.647008	0	0.766222	0.373436	0.578873	0.849514	0.920387	0	0.678643	0.114074	0	0.517984	0.565507
hsa-mir-5699	1.34355	0.929102	1.34359	0.429697	0.273647	0.922669	0.111221	0.998941	1.10492	1.18672	0	0.659931	0	0.751135	0	0.351701	0.497633	0	0.627355	0.473115	0.851499	1.15673	0	0	1.09412	0.770352	1.42977	0.495159	0.290631	0	0.406994	0.627385	0	0.608844	0.732472	0.263444	0.811106	0.733401	2.17122	0.669814	0.219786	0.617859	0.920387	0.412258	0.263288	0.578869	0.89933	0	1.13735
hsa-mir-570	2.02698	1.8923	0.286513	1.02917	0.503572	0.620465	0	0.484822	1.44695	0	0.459696	0	1.13385	0	0	0	1.16072	0.856743	0.627355	0	0.851499	1.79037	0	1.79404	1.09412	2.57041	1.42977	1.60757	0.920445	0.500352	0.983867	0	2.02966	1.36464	1.72909	0.486129	0.249311	0.412811	2.05438	0.373436	0.866159	1.04907	2.19235	1.72917	0	0.497126	0.89933	2.22392	0.970717
hsa-mir-5700	0	0	0	0	0	0	0	0	0	0	0	0	0	0	0	0	0	0	0	0	0	0	0	0	0	0	0	0	0	0	0	0	0	0	0	0	0	0	0	0	0	0	0	0	0	0	0	0	0
hsa-mir-5701-1	0	0	0	0	0	0	0	0	0	0	0	0	0	0	0	0	0	0	0	0	0	0	0	0	0	0	0	0	0	0	0	0	0	0	0	0	0	0	0	0	0	0	0	0	0	0	0	0	0
hsa-mir-5701-2	0	0	0	0	0	0	0	0	0	0	0	0	0	0	0	0	0	0	0	0	0	0	0	0	0	0	0	0	0	0	0	0	0	0	0	0	0	0	0	0	0	0	0	0	0	0	0	0	0
hsa-mir-5701-3	0	0	0	0	0	0	0	0	0	0	0	0	0	0	0	0	0	0	0	0	0	0	0	0	0	0	0	0	0	0	0	0	0	0	0	0	0	0	0	0	0	0	0	0	0	0	0	0	0
hsa-mir-5702	0	0	0	0	0.273647	0	0	0	0	0	0	0	0	0	0	0	0	0	0	0	0	0	0	0	0	0	0	0	0	0	0	0	0	0	0	0	0	0	0	0	0	0	0	0	0	0	0	0	0
hsa-mir-5703	0.691626	0.293986	0.286513	1.77764	0.273647	0.620465	0.111221	0.262681	0	0	0	0.659931	0	0	1.20754	0	1.16072	1.39061	0	0	0	0	0.572121	0.990691	0	0	0	0	0	0.871148	0.406994	0.627385	0.59822	0.837988	1.40801	1.00123	1.0921	0.221121	0.433392	0.25937	0.729655	0.849514	0.532378	0	0.263288	0.41047	0.365581	0.282115	0.970717
hsa-mir-5704	0	0	0	0	0	0	0	0	0	0	0	0	0	0	0.726588	0	0	0	0	0	0	0	0	0	0	0	0	0	0	0	0	0	0	0	0	0	0	0	0	0	0	0	0	0	0	0	0	0	0
hsa-mir-5705	0	0	0	0	0	0	0	0	0	0	0	0	0	0	0	0	0	0	0	0	0	0	0	0	0	0	0	0	0	0	0	0	0	0	0	0	0	0	0	0	0	0	0	0	0	0	0	0	0
hsa-mir-5706	0	0	1.46337	2.71176	0	0.237715	0.243505	0.484822	0.655751	0.712084	1.08798	0.367374	0	0	1.20754	0	0	1.39061	0	0.828799	0	0	0.572121	1.31075	2.00942	1.26985	2.79268	0.495159	0	0	0.724074	0	0.59822	1.03568	0.41223	0.486129	0.46182	0.221121	1.54953	0.373436	0	0.617859	0.920387	0.994435	0.263288	0.219784	0.657	0.282115	1.42206
hsa-mir-5707	0	0	0	0	0	0	0	0	0	0	0	0	0	0	0	0	0	0	0	0	0	0	0	0	0	0	0	0	0	0	0	0	0	0	0	0	0	0	0	0	0	0	0	0	0	0	0	0	0
hsa-mir-5708	0	0	0	0	0.503572	0.237715	0	0	0	0	0	0	0.675559	0	0	0	0	0	0	0	0	0	0	0.578763	0	0	0	0.495159	0	0	0.406994	0	0	0	0	0	0	0	0	0.25937	0	0	0	0	0	0	0.365581	0	0.310287
hsa-mir-571	0	0	0	0	0	0	0	0	0	0	0	0	0	0	0	0	0	0	0	0	0	0	0	0	0	0	0	0	0	0	0	0	0	0	0	0	0	0	0	0	0	0	0	0	0	0	0.194339	0	0
hsa-mir-572	0	0	0.286513	0	0	0	0	0	0	0	0	0	0	0	0	0	0	0	0	0	0	0	0	0	0	0.770352	0	0.495159	0	0	0.983867	0	0	0	0.220789	0	0	0	0	0	0	0.341756	0.532378	0	0	0	0	0	0
hsa-mir-573	0	0.293986	0.730372	0	0.701841	0.237715	0.426694	0.262681	0	1.18672	0	0	0.675559	0	0	0	0	0.856743	0	0	0	0	0	0	0	0.770352	0	0	0.290631	0.500352	0	0.627385	0	0.336305	0.220789	0	0	0	0.609383	0	0	0	0.920387	0	0	0	0.194339	0.898329	0
hsa-mir-5739	0	0	0	0	0	0	0	0	0	0	0	0	0	0	0	0	0	0	0	0	0	0	0	0	0	0	0	0	0	0	0	0	0	0	0	0	0	0	0	0	0	0	0	0	0	0	0	0	0
hsa-mir-574	6.46507	5.73366	8.30394	7.01538	5.06962	6.2387	5.59048	6.55556	6.37002	6.64265	6.09107	4.93453	5.75895	6.12917	5.20983	6.29598	6.55594	7.60597	6.36045	5.95262	5.18557	5.35612	4.38922	6.31247	6.63447	6.33526	6.65748	6.98538	4.67521	5.92354	6.60692	6.55696	6.17841	7.77925	6.5511	7.17236	6.31241	6.26421	6.4947	6.25614	7.27945	7.51172	7.84802	7.60116	5.27947	5.95156	7.43007	6.72449	8.02984
hsa-mir-575	0	0	0	0	0	0	0	0	0	0	0	0	0	0	0	0	0	0	0	0	0	0	0	0	0	0	0	0	0	0	0	0	0	0	0	0	0	0	0	0	0	0	0	0	0	0	0	0	0
hsa-mir-576	3.43851	3.22695	4.47961	5.19912	4.07667	4.14229	2.78168	4.33427	3.43061	3.71427	2.64467	1.73119	4.49184	4.33108	4.92896	2.82241	3.38868	3.52886	3.75796	1.73492	4.94307	5.89244	2.13978	4.11168	5.05109	4.90367	5.01524	3.381	3.37481	3.99314	3.47295	3.43372	4.3594	4.37079	3.53403	2.85011	4.57442	2.76497	4.56078	2.88773	3.09926	4.11313	3.99561	3.3119	2.07155	2.01591	2.87672	3.1685	4.82552
hsa-mir-577	4.47385	1.48964	0.525446	0.429697	4.68063	6.20407	2.33755	3.67612	5.19681	2.7535	4.72885	0.903046	7.39421	7.54541	6.64188	3.65474	3.49792	5.31923	6.89071	3.5209	7.30977	7.12227	2.29091	5.00427	1.86708	3.8488	5.28969	4.78743	4.35164	3.00854	6.69578	5.02663	6.41398	5.75566	4.33507	5.91889	5.21796	3.57678	8.45915	4.21172	4.11199	7.28323	6.03815	6.57893	0.263288	1.10562	3.0625	4.78477	2.27479
hsa-mir-578	0	0.293986	0	0	0	0	0	0	0	0	0	0.367374	0	0	0	0	0	0	0	0	0	0	0	0	0	0	0	0	0	0	0	0	0	0.336305	0	0.263444	0	0	0	0.25937	0	0	0	0	0	0.114074	0	0	0
hsa-mir-5787	0	0	0	0	0	0	0	0	0	0	0	0	0	0	0	0	0	0	0	0	0	0	0	0	0	0	0	0	0	0	0	0	0	0	0	0	0	0	0	0	0	0	0	0	0	0	0	0	0
hsa-mir-579	0.691626	0.293986	0.909778	1.77764	0.701841	0.779466	0.70641	0.677277	1.10492	0	0	0.367374	0	0	1.20754	0.351701	0.497633	0.856743	1.06313	0	1.77109	1.15673	0.572121	0.578763	0.462865	0.770352	0.885202	0	0.290631	0.871148	0.983867	0.627385	1.01984	1.36464	0.99438	0.84909	2.13603	0.581993	1.36559	0	0.219786	0.341756	1.08119	1.99164	0	0.114074	0.89933	1.19903	1.13735
hsa-mir-580	1.91378	0.293986	0.730372	1.77764	1.03161	0.779466	0.533935	0.998941	0.655751	0	0	0	0	0	1.56762	0.351701	0.497633	0.856743	0.627355	0	0	0.691319	0	0	1.09412	1.26985	0	1.15603	1.08125	0.500352	0.724074	1.06317	1.01984	0.336305	0.869361	0	0.647008	0.412811	1.54953	0.479139	0.410474	0.617859	1.08119	0.732515	0.263288	0.318275	0.365581	0.282115	0.970717
hsa-mir-581	0	0.929102	1.34359	1.45141	0.503572	0.441747	0	0.677277	0	1.82891	0	0	1.13385	1.24259	1.85554	0.351701	0.497633	1.39061	0	0	0.851499	1.50806	0	0	1.32947	1.26985	0.885202	0.495159	0.532417	0	1.20394	1.06317	0.59822	1.36464	0.41223	0.263444	1.0921	0.221121	1.6334	0.756464	0	1.22434	1.22585	0	0	0.578869	0	0.517984	0.565507
hsa-mir-582	7.00021	6.05138	8.17169	8.0098	8.61926	8.54111	6.41182	7.14357	8.02526	10.7543	9.51864	8.55893	7.95216	9.78388	7.59121	8.75928	10.9072	11.0393	7.21021	8.98388	9.19422	8.08478	7.26059	8.35424	9.94825	8.71485	8.28082	7.33186	8.88778	11.4963	7.4939	9.78978	9.25852	8.78285	9.33785	8.74729	8.14088	8.96359	7.31952	8.18545	8.94362	8.48534	8.50809	9.03599	5.71299	7.92911	8.97389	7.91775	9.12146
hsa-mir-583	0	0	0	0	0	0	0	0	0	0	0	0	0	0	0	0	0	0	0	0	0	0	0	0	0	0	0	0	0	0	0	0	0	0	0	0	0	0	0	0	0	0	0	0	0	0	0	0	0
hsa-mir-584	6.8923	4.05273	6.5228	4.42426	4.46564	6.83776	7.33957	6.35193	6.38996	8.97876	6.6556	5.24147	6.30807	8.98249	4.92896	5.77696	5.76941	7.49361	8.56622	5.98833	6.79701	5.66663	2.7741	6.33028	3.27804	6.25755	4.72305	4.80866	7.95191	8.28311	5.74074	8.97987	5.99298	6.0524	5.70777	5.10672	5.78501	4.89023	5.1216	7.1379	6.13842	5.44296	6.22621	4.40441	4.87922	4.56738	5.85337	6.068	5.22778
hsa-mir-585	0.691626	0.538086	0.525446	0.429697	0.273647	0	0	0	0	0	0.459696	0.367374	0	0.751135	0.726588	0.351701	0.497633	0	0	0.473115	0	0	0.980694	0	0.812745	0	0.885202	0.863107	0.290631	0	1.85094	1.06317	0	0	1.79932	1.13884	0.647008	0.412811	0.232909	0.135506	0.729655	0.341756	1.08119	0.412258	0.263288	0.318275	0.518636	0	0
hsa-mir-586	0	0	0	0	0	0	0	0	0	0	0	0	0	0	0	0	0	0	0	0	0	0	0	0	0	0	0	0	0	0	0	0	0	0	0	0	0	0	0	0	0	0	0	0	0	0	0	0	0
hsa-mir-587	0	0	0	0	0	0	0	0	0	0	0	0	0	0	0	0	0	0	0	0	0	0	0	0	0	0	0	0	0	0	0	0	0	0	0	0	0	0	0	0	0	0	0	0	0	0	0	0	0
hsa-mir-588	0	0	0	0	0	0.237715	0	0	0	0	0	0	0	0	0	0	0.497633	0	0	0	0	0.691319	0	0	1.09412	0.770352	0	0	0	0	0	0	0	0	0	0	0	0	0	0	0	0	0	0	0.263288	0.318275	0	0	0
hsa-mir-589	5.80869	4.81366	5.50389	6.51108	5.70517	5.66665	5.11386	5.59486	5.91337	6.17941	5.54784	4.98825	6.40276	6.10073	6.72459	4.54604	5.35593	6.38744	5.31019	5.22811	5.44731	6.12625	4.66308	6.41617	5.98676	6.68115	6.1212	5.77192	5.33992	5.98148	6.36597	5.34935	5.66798	5.92729	5.78768	5.21184	6.38909	5.0788	6.11903	5.12418	5.36868	5.13808	6.03815	5.66149	4.66822	4.3224	4.89918	5.2371	5.87255
hsa-mir-590	5.20881	4.5188	4.28199	5.82932	4.50598	4.67468	3.91475	3.60686	4.55102	4.62131	3.3228	2.70267	5.31538	4.78876	5.28443	3.03169	3.59946	5.40457	4.16081	2.84993	4.82521	5.922	3.71893	5.19128	4.89477	5.82653	5.83045	4.94915	3.52221	4.26608	4.89147	4.24619	4.42988	5.04559	5.13202	3.85028	6.03374	4.75517	5.4161	3.58851	3.93704	4.33953	5.4247	5.36994	1.76661	3.09925	3.99971	5.05226	5.15191
hsa-mir-591	0	0	0	0	0	0	0	0	0	0	0	0	0	0	0	0	0	0	0	0	0	0	0	0	0	0	0	0	0	0	0	0	0	0	0	0	0	0	0	0	0	0	0	0	0	0	0	0	0
hsa-mir-592	4.11272	2.20676	1.57396	3.59723	2.98046	2.89694	2.40394	2.19998	3.17889	0.712084	0	0.367374	5.71041	1.6085	4.89761	1.55211	1.16072	3.18736	3.75796	1.35186	4.39981	5.01581	0.572121	0.578763	1.53176	3.24309	2.13359	2.46054	4.03554	1.41047	3.33996	1.66859	2.8412	3.97279	1.49522	1.48701	3.84733	1.31658	3.94173	3.39949	0.990857	1.04907	4.20212	3.3119	0.485863	0.497126	1.20025	2.67794	2.12411
hsa-mir-593	0	0	0	0	0	0	0	0	0	0	0	0	0	0	0	0	0	0	0	0	0	0	0	0	0	0	0	0	0	0	0	0	0	0	0	0	0	0	0	0	0	0	0	0	0	0	0	0	0
hsa-mir-595	0	0	0	0	0	0	0	0	0	0	0	0	0	0	0	0	0	0	0	0	0	0	0	0	0	0	0	0	0	0	0	0	0	0	0	0	0	0	0	0	0	0	0	0	0	0	0	0	0
hsa-mir-596	0	0	0	0	0	0	0	0	0	0	0	0	0	0	0	0	0	0	0	0	0	0	0	0	0	0	0	0	0	0	0	0	0	0	0.220789	0	0	0	0	0	0	0	0	0	0	0	0	0	0
hsa-mir-597	0	0	0	0	0.273647	0.237715	0.243505	0	0	0	0	0	0	1.24259	0.726588	0	0	0	0	0	0	0	0	0	0.462865	0.770352	0	0.495159	0.290631	0.500352	0	0	0.59822	0	0	0	0	0	0.232909	0.135506	0.219786	0	1.69223	0	0	0	0	0	0
hsa-mir-598	4.18768	3.62072	3.50149	4.42426	3.5933	2.54506	4.35181	4.89519	5.12725	3.00358	4.35847	3.36178	5.29358	3.87404	4.49862	3.99163	4.79562	4.17231	5.6288	4.20669	2.72915	4.08608	4.28502	3.79002	3.86967	3.53422	4.5771	5.93529	3.43559	4.16968	5.78405	3.35909	6.77376	6.16224	5.59383	5.13989	5.03914	5.2329	5.92467	4.74952	5.92837	5.46058	9.43626	5.41537	4.10577	3.91359	5.15413	4.47026	4.82552
hsa-mir-599	0	0	0.286513	0.760351	0	0	0.243505	0	0	0	0	0	0	0	0	0	0	0	0	0	0	0	0	0	0.462865	0	0	0	0	0.871148	0	0.627385	0	0.608844	0.220789	0.486129	0.647008	0	0.609383	0.135506	0.219786	0	0.739388	0.412258	0.263288	0.219784	0	0	0
hsa-mir-600	0.386867	0.293986	0	0.429697	0.273647	0	0	0.484822	0	0	0	0	0	0	0.726588	0	0	0	0	0	0	0	0	0	0.812745	0	0	0	0.532417	0	0	0	0.59822	0	0	0.263444	0	0	0	0	0	0	0	0	0	0	0	0.282115	0
hsa-mir-601	0	0	0	0	0	0	0	0	0	0	0	0	0	0	0	0	0	0	0	0	0	0	0	0	0	0	0	0	0	0	0	0	0	0	0	0	0	0	0	0	0	0	0	0	0	0	0	0	0
hsa-mir-602	0	0.293986	0	0	0	0	0	0	0	0	0	0	0	0	0	0	0	0	0	0	0	0	0	0	0	0	0	0	0	0	0	0	0	0	0	0	0	0	0	0	0	0	0	0	0	0	0	0	0
hsa-mir-603	0	0	0	0	0	0	0	0	0	0	0	0	0	0	0	0	0	0	0	0	0	0	0	0	0	0	0	0	0	0	0	0	0	0	0	0	0	0	0	0	0	0	0	0	0	0	0	0	0
hsa-mir-604	0	0	0	0	0	0	0	0	0	0	0	0	0	0	0	0	0	0	0	0	0	0	0	0	0	0	0	0	0	0	0	0	0	0	0	0	0	0	0	0	0	0	0	0	0	0	0	0	0
hsa-mir-605	0.691626	0.293986	0	0.760351	0.273647	0.237715	0	0.262681	0	0.712084	0.459696	0	0	0	0	0.634248	0.497633	0.856743	0	0.473115	0	0.691319	0	0	0.812745	0	1.82418	0.863107	0.290631	0.500352	0.406994	0.627385	0	0.837988	0.220789	1.13884	0.647008	1.2173	0.766222	0.373436	1.31095	0.617859	1.4778	0.412258	0.263288	0.656229	1.00676	0.282115	0.310287
hsa-mir-606	0	0	0	0	0	0	0	0	0	0	0	0	0	0	0	0	0.497633	0	0	0	0	0	0	0	0	0	0	0	0	0	0	0	0	0	0	0	0	0	0	0	0	0	0	0	0	0	0	0	0
hsa-mir-6068	0	0	0	0	0	0	0	0	0	0	0	0	0	0	0	0	0	0	0	0	0	0	0	0	0	0	0	0	0	0	0	0	0	0	0	0	0	0	0	0	0	0	0	0	0	0	0	0	0
hsa-mir-6069	0	0	0	0	0	0	0	0	0	0	0	0	0	0	0	0	0	0	0	0	0	0	0	0	0	0	0	0	0	0	0	0	0	0	0	0	0	0	0	0	0	0	0	0	0	0	0	0	0
hsa-mir-607	0.386867	0	0.525446	0	0	0	0.229065	0.998941	0	0	0	0.367374	0	0	1.20754	0	0	0.856743	0.627355	0.828799	0.851499	0	0	0	1.53176	0.770352	0.885202	0.495159	0.290631	0	0.406994	0	0	0	0.41223	0	0.249311	0.733401	0.609383	0.25937	0.219786	0.341756	0.290608	0	0	0.114074	1.00676	0.282115	0.310287
hsa-mir-6070	0	0	0	0	0	0	0	0	0	0	0	0	0	0	0	0	0	0	0	0	0	0	0	0	0	0	0	0	0	0	0	0	0	0	0	0	0	0	0	0	0	0	0	0	0	0	0	0	0
hsa-mir-6071	0	0	0	0	0	0	0	0	0	0	0	0	0	0	0	0	0	0	0	0	0	0	0	0	0	0	0	0	0	0	0	0	0	0	0	0	0	0	0	0	0	0	0	0	0	0	0	0	0
hsa-mir-6072	0	0	0	0	0	0	0	0	0	0	0	0	0	0	0	0	0	0	0	0	0	0	0	0	0	0	0	0	0	0	0	0	0	0	0	0	0	0	0	0	0	0	0	0	0	0	0	0	0
hsa-mir-6073	0	0	0	0	0	0	0	0	0	0	0	0	0	0	0	0	0	0	0	0	0	0	0	0	0	0	0	0	0	0	0	0	0	0	0	0	0	0	0.232909	0	0.219786	0	0	0	0	0	0	0	0
hsa-mir-6074	0	0	0	0	0	0	0	0	0	0	0	0	0	0	0	0	0	0	0	0	0	0	0	0	0	0	0	0	0	0	0	0	0	0	0	0	0	0	0	0	0	0	0	0	0	0	0	0	0
hsa-mir-6075	0	0	0	0	0	0	0	0	0	0	0	0	0	0	0	0	0	0	0	0	0	0	0	0	0	0	0	0	0	0	0	0	0	0	0	0	0	0	0	0	0	0	0	0	0	0	0	0	0
hsa-mir-6076	0	0	0	0	0	0	0	0	0	0	0	0	0	0	0	0	0	0	0	0	0	0	0	0	0	0	0	0	0	0	0	0	0	0	0	0	0	0	0	0	0	0	0	0	0	0	0	0	0
hsa-mir-6077	0	0	0	0	0	0	0	0	0	0	0	0	0	0	0	0	0	0	0	0	0	0	0	0	0	0	0	0	0	0	0	0	0	0	0	0	0	0	0	0	0.219786	0	0	0	0	0	0	0	0
hsa-mir-6078	0	0	0	0	0	0	0	0	0	0	0	0	0	0	0	0	0	0	0	0	0	0	0	0	0	0	0	0	0	0	0	0	0	0	0	0	0	0	0	0	0	0	0	0	0	0	0	0	0
hsa-mir-6079	0	0	0	0	0	0	0	0	0	0	0	0	0	0	0	0	0	0	0	0	0	0	0	0	0	0	0	0	0	0	0	0	0	0	0	0	0	0	0	0	0	0	0	0	0	0	0	0	0
hsa-mir-608	0	0	0	0	0	0	0	0	0	0	0	0	0	0	0	0	0	0	0	0	0	0	0	0	0	0	0	0	0	0	0	0	0	0	0	0	0	0	0	0	0	0	0	0	0	0	0	0	0
hsa-mir-6080	0	0	0	0	0	0	0	0	0	0	0	0	0	0	0	0	0	0	0	0	0	0	0	0	0	0	0	0	0	0	0	0	0	0	0	0	0	0	0	0	0	0	0	0	0	0	0	0	0
hsa-mir-6081	0	0	0	0	0	0	0	0	0	0	0	0	0	0	0	0	0	0	0	0	0	0	0	0	0	0	0	0	0	0	0	0	0	0	0	0	0	0	0	0	0	0	0	0	0	0	0	0	0
hsa-mir-6082	0	0	0	0	0	0	0	0	0	0	0	0	0	0	0	0	0	0	0	0	0	0	0	0	0	0	0	0	0	0	0	0	0	0	0	0	0	0	0	0	0	0	0	0	0	0	0	0	0
hsa-mir-6083	0	0	0	0	0	0	0	0	0	0	0	0	0	0	0	0	0	0	0	0	0	0	0	0	0	0	0	0	0	0	0	0	0	0	0	0	0	0	0	0	0	0	0	0	0	0	0	0	0
hsa-mir-6084	0	0.293986	0	0	0	0	0	0	0	0	0	0	0	0	0	0	0	0	0	0	0	0	0	0	0.462865	0	0	0	0	0	0	0	0	0	0	0	0	0	0	0	0	0.341756	0	0	0	0	0	0	0.310287
hsa-mir-6085	0	0	0	0	0	0	0	0	0	0	0	0	0	0	0	0	0	0	0	0	0	0	0	0	0	0	0	0	0	0	0	0	0	0	0	0	0	0	0	0	0	0	0	0	0	0	0	0	0
hsa-mir-6086	0	0	0	0	0	0	0	0	0	0	0	0	0	0	0	0	0	0	0	0	0	0	0	0	0	0	0	0	0	0	0	0	0	0	0	0	0	0	0	0	0	0	0	0	0	0	0	0	0
hsa-mir-6087	0	0	0	0.429697	0	0	0	0	0.655751	0	0	0	0	1.24259	0.726588	0	0	0.856743	0	0	0	0	0	0	0	0	0	0	0	0	0	0	0	0	0	0	0	0	0	0	0.219786	0.341756	0	0.412258	0	0	0	0.282115	0
hsa-mir-6088	0	0	0	0	0	0	0	0	0	0	0	0	0	0	0	0	0	0	0	0	0	0	0	0	0	0	0	0	0	0	0	0	0	0	0	0	0	0	0	0	0	0	0	0	0	0	0	0	0
hsa-mir-6089-1	0	0	0	0	0	0	0	0	0	0	0	0	0	0	0	0	0	0	0	0	0	0	0	0	0	0	0	0	0	0	0	0	0	0	0	0	0	0	0	0	0	0	0	0	0	0	0	0	0
hsa-mir-6089-2	0	0	0	0	0	0	0	0	0	0	0	0	0	0	0	0	0	0	0	0	0	0	0	0	0	0	0	0	0	0	0	0	0	0	0	0	0	0	0	0	0	0	0	0	0	0	0	0	0
hsa-mir-609	0	0	0	0	0	0	0	0	0	0	0	0	0	0	0	0	0	0	0	0	0	0	0	0	0	0	0	0	0	0	0	0	0	0	0	0	0	0	0	0	0	0	0.290608	0.412258	0	0	0	0	0
hsa-mir-6090	0	0	0	0	0	0	0	0	0	0	0	0	0	0	0	0	0	0	0	0	0	0	0	0	0	0	0	0	0	0	0	0	0	0	0	0	0	0	0	0	0	0	0	0	0	0	0	0	0
hsa-mir-610	0	0	0	0	0	0	0	0	0	0	0	0	0	0	0	0	0	0	0	0	0	0	0	0	0	0	0	0	0	0	0	0	0	0	0	0	0	0	0	0	0	0	0	0	0	0	0	0	0
hsa-mir-611	0	0	0	0	0	0	0	0	0	0	0	0	0	0	0	0	0	0.856743	0	0	0	0	0	0.578763	0	0	0	0	0	0	0	0	0	0	0	0	0	0	0.433392	0	0	0.341756	0	0	0	0	0	0	0
hsa-mir-612	0.386867	1.70497	0	1.02917	0.701841	0.237715	0	0.262681	0	0	0	0	0	0	0	0	0	0	0	0.473115	0	0	0	0.578763	0.462865	0.770352	0	0	0.290631	0	0	0	0	0.336305	0	0	0	0	0	0	0	0	0	0	0	0	0	0	0.310287
hsa-mir-6124	0	0	0	0	0	0	0	0	0	0	0	0	0	0	0	0	0	0	0	0	0	0	0	0	0	0	0	0	0	0	0	0	0	0	0	0	0	0	0	0	0	0	0	0	0	0	0	0	0
hsa-mir-6125	0.386867	0.538086	0.730372	0	0	0	0	0	0	0	0	0	0	0	0	0	0	0	0	0	0	0	0	0.578763	0.462865	0.770352	0.885202	0.495159	0.290631	0.500352	0	0.627385	0.59822	0	0.41223	0.486129	0.249311	0	1.26401	0.373436	0.729655	0.341756	0.532378	0.732515	0.485863	0.219784	0.365581	0	0.310287
hsa-mir-6126	0	0	0	0	0	0	0	0	0	0	0	0	0	0	0	0	0	0	0	0	0	0	0	0	0	0	0	0	0	0	0	0	0	0	0	0	0	0	0	0	0	0	0	0	0	0	0	0	0
hsa-mir-6127	0	0	0	0	0	0	0	0	0	0	0	0	0	0	0	0	0	0	0	0	0	0	0	0	0	0	0	0	0	0	0	0	0	0	0	0	0	0	0	0	0	0	0	0	0	0	0	0	0
hsa-mir-6128	0	0	0	0	0	0	0	0	0	0	0	0	0	0	0	0	0	0	0	0	0	0	0	0	0	0	0	0	0	0	0	0	0	0	0	0	0	0	0	0	0	0	0	0	0	0	0	0	0
hsa-mir-6129	0	0	0	0	0	0	0	0	0	0	0	0	0	0	0	0	0	0	0	0	0	0	0	0	0	0	0.885202	0.495159	0	0	0	0	0.59822	0	0	0.263444	0	0	0	0.135506	0	0	0	0	0.263288	0.114074	0.194339	0	0
hsa-mir-613	0	0	0	0	0	0	0	0	0	0	0	0	0	0	0	0	0	0	0	0	0	0	0	0	0	0	0	0	0	0	0	0	0	0	0	0	0	0	0	0	0	0	0	0	0	0	0	0	0
hsa-mir-6130	0	0	0	0	0	0	0	0	0	0	0	0	0	0	0	0	0	0	0	0	0	0	0	0	0	0	0	0	0	0	0	0	0	0	0	0	0	0	0	0.135506	0	0	0.290608	0	0	0.114074	0.365581	0	0
hsa-mir-6131	0	0	0	0	0	0	0	0	0	0	0	0	0	0	0	0	0	0	0	0	0	0	0	0	0	0	0	0	0	0	0	0	0	0	0	0	0	0	0	0	0	0	0	0	0	0	0	0	0
hsa-mir-6132	0.386867	0	0.525446	0	0.273647	0	0	0.262681	0	0	0	0	0.675559	0	0	0.351701	0.497633	0.856743	0	0	0	0	0	0	0	0	0	0	0	0	0	0	0	0	0	0	0.46182	0	0	0.25937	0.410474	0.341756	0	0.412258	0	0	0.365581	0.282115	0.565507
hsa-mir-6133	0	0	0	0	0	0	0	0	0	0	0	0	0	0	0	0	0	0	0	0	0	0	0	0	0	0	0	0	0	0	0	0	0	0	0	0	0	0	0	0	0	0	0	0	0	0	0	0	0
hsa-mir-6134	0	0	0	0	0	0	0	0	0	0	0	0	0	0	0	0	0	0	0	0	0	0	0	0	0	0	0	0	0	0	0	0	0	0	0	0	0	0	0	0	0	0	0	0	0	0.114074	0	0	0
hsa-mir-614	0	0.929102	0.525446	0.760351	1.03161	0	0	0	0	0	0	0	0.675559	0.751135	0	0	0	1.39061	0	0.828799	0	0	0	0	1.09412	0.770352	1.42977	0	0.290631	0	0	0	0	0.837988	0	0	0	0	0	0.135506	0	0.341756	0	0	0	0	0	0.517984	0.310287
hsa-mir-615	4.47385	0	3.82592	2.46215	0.876125	2.40571	0.426694	0.998941	3.88855	2.7535	1.08798	0.903046	0	2.35013	1.20754	1.07331	0.497633	1.39061	1.06313	0.473115	0	0	0	2.15542	1.70914	0	0.885202	2.83636	1.87896	2.76635	4.31494	1.66859	1.34571	4.82283	0	0.84909	3.72918	0.995543	2.93691	0.373436	2.208	0	3.06422	0.732515	0	0.656229	1.37083	2.3515	2.9028
hsa-mir-616	2.13194	1.80168	3.3543	5.056	1.29984	2.50009	0.851051	2.5343	3.70975	3.31243	1.52419	0.903046	3.69424	2.96923	4.27293	2.4375	2.4675	3.80479	3.57224	1.11391	3.17692	2.70771	1.7797	3.23123	3.48716	2.17901	3.10822	3.63985	1.69231	2.36334	3.08681	2.56141	2.02966	3.49034	1.40801	0.678994	3.30247	1.11068	2.33046	1.25017	1.86115	2.89048	2.61649	2.10691	0.485863	0.41047	1.10675	1.32874	3.46963
hsa-mir-6165	0	0	0	0	0	0	0	0	0	0	0	0	0	0	0	0	0	0	0	0	0	0	0	0	0	0	0	0	0	0	0	0	0	0	0	0	0	0	0	0	0	0	0	0	0	0	0	0	0
hsa-mir-617	0	0	0	0	0	0	0	0	0	0	0	0	0	0	0	0	0	0	0	0	0	0	0	0	0	0	0	0	0	0	0	0	0	0	0	0	0	0	0	0	0	0	0	0	0	0	0	0	0
hsa-mir-618	1.34355	0	0.525446	0.429697	1.17195	0.620465	0.822479	0	0.655751	0	0	0	0	0	1.20754	0	1.16072	0.856743	1.39736	0	0.851499	0	0	0	0.812745	0	0	0	0.739437	0	0.406994	1.06317	0	1.03568	0.99438	0.263444	0.811106	0	0.433392	0.135506	0.578873	0	0.532378	0.412258	0	0	0	0.282115	1.28672
hsa-mir-619	0	0	0	0	0	0	0	0	0	0	0	0	0	0	0	0	0	0	0	0	0	0	0	0	0	0	0	0	0	0	0	0	0	0	0	0	0	0	0	0	0	0	0	0	0	0	0	0	0
hsa-mir-620	0	0	0	0	0	0	0	0	0	0	0	0	0	0	0	0	0	0	0	0	0	0	0	0	0	0	0	0	0	0	0	0	0	0	0	0	0	0	0	0	0	0	0	0	0	0	0	0	0
hsa-mir-621	0	0	0	0	0.503572	0	0	0	0	0	0	0	0	0	0	0	0	0	0	0	0	0.691319	0	0	0	0	0	0	0	0	0.406994	0	0	0	0	0	0	0	0.232909	0	0	0	0	0	0	0	0.194339	0.282115	0
hsa-mir-622	0	0	0	0	0.701841	0.441747	0.243505	0	0	0	0	0	0	0	0	0	0	0	0	0	0	0	0	0	0	0.770352	0.885202	0	0	0	0	0	0	0	0	0	0	0	0	0	0	0	0	0	0	0	0	0	1.13735
hsa-mir-623	0	0.293986	0	0	0.273647	0	0	0	0	0	0	0	0	0	0	0	0	0	0	0	0	0	0	0	0	0	0	0	0	0	0	0	0	0	0	0	0	0	0	0	0	0	0	0	0	0	0	0	0
hsa-mir-624	1.15718	0.929102	1.06932	2.63326	1.03161	0.922669	0.982502	0.847055	0.655751	0	0.807771	0.659931	0.675559	1.90013	1.85554	0.634248	0.497633	0.856743	0.627355	0	0	1.50806	0.572121	1.57254	1.32947	1.26985	1.42977	0.863107	1.47788	0.871148	0.406994	0.627385	1.61136	1.36464	1.65527	1.13884	1.86431	0.870418	1.6334	0.838204	0.578873	1.22434	1.96385	1.86637	0.678643	0.656229	1.10675	1.0565	1.95585
hsa-mir-625	8.98299	9.62207	10.2798	10.3377	9.30703	8.64546	8.34348	7.85338	8.45477	8.63872	8.84175	9.02988	10.3025	8.40575	10.603	8.03884	7.76591	8.46332	9.63718	7.75495	10.3182	10.2614	6.29253	8.1362	9.92767	9.81385	11.7332	7.99365	8.50998	7.5254	8.53623	7.38031	9.46352	10.5548	10.0755	9.66743	8.9894	9.26333	9.64403	6.57653	7.38264	9.40357	7.30063	10.2623	7.62064	6.82625	9.22779	7.97336	10.2583
hsa-mir-626	0	0	0	0	0	0	0	0	0	0	0	0	0	0	0	0	0	0	0	0	0	0	0	0	0	0	0	0	0	0	0	0	0	0	0	0	0	0	0	0	0	0	0	0	0	0	0	0	0
hsa-mir-627	0.943099	1.8923	0.730372	2.36833	1.62695	1.65512	0.775582	1.2618	1.72323	2.27173	1.08798	0.367374	1.7608	1.24259	2.3011	0	0.497633	2.08535	0	1.11391	1.77109	2.02637	0	1.57254	0.812745	2.38795	2.38822	0.863107	1.08125	1.16586	1.56341	0.627385	1.83562	1.63234	2.31293	2.07226	2.19665	1.31658	2.05438	0.25937	1.21194	1.5216	2.9014	2.40598	0	1.10562	1.44911	1.32874	2.59432
hsa-mir-628	3.21783	3.08044	4.31421	4.67996	3.71302	3.15079	2.9544	2.76373	6.06986	4.79717	3.70134	4.08323	5.60813	5.43807	6.13751	4.51153	5.52031	5.45878	4.64202	4.48192	4.90485	6.16385	4.42235	5.58162	5.27901	5.6553	6.28686	5.05955	4.61078	5.05899	6.39978	5.66031	4.56128	5.27808	3.47088	3.96577	4.9539	3.45132	4.4495	3.16619	3.39842	4.50151	4.70008	5.29899	1.92712	2.56968	3.45283	3.95144	4.05285
hsa-mir-629	6.59468	5.72135	6.94938	6.82543	5.37569	6.52629	5.73247	5.39025	6.59279	6.2046	5.64841	4.77559	5.83638	5.58901	6.88503	5.4434	4.99513	6.07676	5.00224	5.34293	6.45734	6.83435	1.55916	6.90034	7.25087	6.38483	7.01011	5.24233	5.68475	5.49003	7.30166	4.95242	5.95763	6.39156	6.2957	5.9797	6.94751	5.12746	7.223	5.50192	5.31601	6.17195	6.18255	5.99652	4.83941	4.92084	6.36837	6.05868	7.17724
hsa-mir-630	0	0	0	0	0	0	0	0	0	0	0	0	0	0	0	0	0	0	0	0	0	0	0.572121	0	0	0	0	0	0	0	0	0	0	0	0	0	0	0	0	0	0	0	0	0	0	0	0	0	0
hsa-mir-631	0	0	0	0	0	0	0	0	0	0	0	0	0	0	0	0	0	0	0	0	0.851499	0	0	0	0	0	0	0	0	0	0	0	0.59822	0	0	0	0	0	0	0	0	0	0	0	0	0	0	0	0
hsa-mir-632	0.691626	0.293986	0.730372	2.46215	0.503572	0	0.310836	0	0	0	0	0	0	0	0.726588	0.351701	0.497633	0.856743	0.627355	0	0.851499	0	0	0.990691	0.462865	0.770352	0.885202	1.60757	0.290631	0	1.20394	1.06317	0.59822	1.63234	0.732472	0.486129	1.93719	0	0.766222	0.373436	0.219786	0.617859	0.290608	0.412258	0	0.318275	0.365581	1.0565	0.565507
hsa-mir-633	0	0	0	0	0	0	0	0	0	0	0	0	0	0	0	0	0	0	0	0	0	0	0	0	0	0	0	0	0	0	0	0	0	0	0	0	0	0	0	0	0	0	0	0	0	0	0	0	0
hsa-mir-634	0	0	0	0	0	0	0	0	0	0	0	0	0	0	0	0	0	0	0	0	0	0	0	0	0	0	0	0	0	0	0	0	0	0	0	0	0	0	0	0	0	0	0	0	0	0	0	0	0
hsa-mir-635	0	0	0	0	0	0	0	0	0	0	0	0	0	0	0	0	0	0	0	0	0	0	0	0	0	0	0	0	0	0	0	0	0	0	0	0	0	0	0	0	0	0	0	0	0	0	0	0	0
hsa-mir-636	1.34355	0	1.06932	0.429697	0	0.620465	0.229065	0.262681	0	0	0.459696	0	0	0	0.726588	0.351701	0	0.856743	0	0.473115	0	0	0	0.578763	0	0	0.885202	0	0	0	0	0	0.59822	0.837988	0.581218	0.263444	0.958431	0.412811	0.232909	0	0	0	0.290608	0	0	0	0.194339	0	0.782292
hsa-mir-637	0	0	0	0	0	0	0	0	0	0	0	0	0	0	0	0	0	0	0	0	0	0	0	0	0	0	0	0	0	0	0	0	0	0	0	0	0	0	0	0	0	0	0	0	0	0	0	0	0
hsa-mir-638	0	0	0	0	0	0	0	0	0	0	0	0	0	0	0	0	0	0	0	0	0	0	0	0	0	0	0	0	0	0	0	0	0	0	0	0	0	0	0	0	0	0	0	0	0	0	0	0	0
hsa-mir-639	0.943099	0.746801	1.67667	1.02917	0	0.441747	0	0	0	0.712084	0.459696	0	1.13385	0	1.56762	0.351701	0	1.39061	0.627355	0	0	0.691319	1.55916	0	0.462865	1.26985	0	0.495159	0.532417	1.16586	0	0	1.61136	1.20951	1.10942	0.678994	1.70649	0.412811	1.15472	0.373436	0.578873	0.617859	0.739388	0.412258	0.263288	0	0.657	0.517984	0.565507
hsa-mir-640	0	0.293986	0	0	0	0	0	0	0	0	0	0	0	0	0	0	0	0	0	0	0	0	0	0	0	0	0	0	0	0	0	0	0	0	0	0	0	0	0	0	0	0	0	0	0	0	0	0	0
hsa-mir-641	0.691626	0	0	0.760351	0.273647	0.237715	0	0.484822	0	0.712084	0.459696	0	0	0	0	0	0	0	0	0	0	1.15673	0	0	1.70914	0	1.42977	0.863107	0	0.500352	0	0	0.59822	0.608844	0.220789	0.263444	0.647008	0.412811	0.433392	0	0	0.341756	0.290608	0.732515	0	0.114074	0.194339	0	0.565507
hsa-mir-642a	1.34355	0.929102	2.74672	2.55024	0.876125	2.19613	1.53367	2.32023	2.87377	3.00358	0	0.659931	2.19638	1.90013	2.09545	1.40946	0.86694	2.33763	1.66854	1.11391	2.07639	3.06645	2.66762	2.89072	0.462865	3.13135	1.82418	1.15603	1.47788	1.80213	2.55797	1.66859	2.35354	3.23275	1.99156	1.76727	2.41649	1.31658	2.11398	1.30869	1.10563	3.84448	3.24487	4.33517	0	0.929849	2.24768	2.3515	3.3727
hsa-mir-642b	0	0	0.286513	0	0	0	0.126884	0	0	0.712084	0	0	0	0	0	0	0	0	0	0	0	0.691319	0.572121	0	0	0	0	0	0.532417	0	0.406994	0	0	0	0	0.263444	0	0	0	0	0	0.341756	0	0	0	0	0	0	0.310287
hsa-mir-643	0.943099	0.538086	0.525446	0.429697	0.876125	1.1724	0.685409	0.677277	1.10492	1.54325	0.807771	0.659931	1.48111	0.751135	1.20754	1.25116	1.16072	1.39061	0.627355	0.473115	0	1.79037	0.572121	0.990691	1.70914	1.64018	2.38822	0.495159	0.920445	0.871148	2.38873	0	0.59822	0.837988	0.732472	0.263444	1.0921	0.221121	0.907669	0.669814	0	0.341756	1.96385	0	0.263288	0.318275	0.518636	0.720654	1.86374
hsa-mir-644a	0	0	0	0	0	0	0	0	0	0	0	0	0	0	0	0	0	0	0	0	0	0	0	0	0	0	0	0	0	0	0	0	0	0	0	0	0	0	0	0	0	0	0	0	0	0	0	0	0
hsa-mir-645	0	0	0	0	0	0	0	0	0	0	0	0	0	0	0	0	0	0	0	0	0	0	0	0	0	0	0	0	0	0	0	0	0	0	0	0	0	0	0	0	0	0	0	0	0	0	0	0	0
hsa-mir-646	0	0	0	0	0	0	0	0	0	0	0	0	0	0	0	0	0	0	0	0	0	0	0	0	0	0	0	0	0	0	0	0	0	0	0	0	0	0	0	0	0	0	0	0	0	0	0	0	0
hsa-mir-647	0	0.538086	0	0	0	0	0	0	0	0	0	0	0	0	0	0	0	0	0	0	0	0	0	0	0	0	0	0	0	0	0	0	0	0	0	0	0	0	0	0	0	0	0	0	0	0	0	0	0
hsa-mir-648	0	0	0	0	0	0	0	0	0	0	0	0	0	0	0	0	0	0	0	0	0	0	0	0	0	0	0	0	0	0	0	0	0	0	0	0	0	0	0	0	0	0	0	0	0	0	0	0	0
hsa-mir-649	0	0	0	0	0	0	0	0	0	0	0	0	0	0	0	0	0	0	0	0	0	0	0	0	0	0	0	0	0	0	0	0	0	0	0	0	0	0	0	0	0	0	0	0	0	0	0	0	0
hsa-mir-6499	0	0	0	0	0	0	0	0	0	0	0	0	0	0	0	0	0	0	0	0	0	0	0	0	0	0	0	0	0	0	0	0	0	0	0	0	0	0	0.232909	0	0	0	0	0	0	0	0	0	0
hsa-mir-650	0	0	0	0	0	0	0	0	0	0	0	0	0	0	0	0	0	0	0	0	0	0	0	0	0	0	0	0	0	0	0	0	0	0	0	0	0	0	0	0	0.219786	0	0	0	0	0	0	0	0
hsa-mir-6500	0	0	0	0	0	0	0	0	0	0	0	0	0	0	0	0	0	0	0	0	0	0	0	0	0	0	0	0	0	0	0	0	0	0	0	0	0	0	0	0	0	0	0	0	0	0	0	0	0
hsa-mir-6501	0.691626	0.293986	0.909778	0	0	0.441747	0.426694	0.262681	0.655751	0.712084	0	0.367374	0	0	1.20754	0	0.497633	0.856743	0.627355	0.828799	0	0	0	0	1.09412	0	0	0	0.290631	0.871148	0.406994	0.627385	0.59822	0.336305	0.220789	0.263444	1.0921	0.412811	0.433392	0.135506	0.219786	0.341756	0.290608	0	0	0	0.518636	0.517984	0.782292
hsa-mir-6502	0	0	0.730372	0.760351	0.701841	0.237715	0.243505	0.262681	0	0	0.459696	0.367374	1.99497	0.751135	0	0.351701	0.497633	0	1.06313	0	0.851499	0.691319	0	0.578763	0	0.770352	2.13359	0.495159	0	0	0.406994	0.627385	0	1.03568	0.41223	0.263444	0.647008	0	0.609383	0.373436	0	0.617859	0.290608	0	0.485863	0.114074	0.194339	0	0
hsa-mir-6503	0	0.538086	1.57396	0.760351	0.273647	0.922669	0.600484	0.262681	0.655751	0	0	0.367374	0.675559	0	0	0.634248	0	0	0.627355	0	0.851499	0.691319	0	0	0.462865	0	0.885202	0.863107	0	0.500352	1.20394	0	0	0.336305	1.57746	0.678994	0.811106	0	0.907669	0.25937	0.219786	0.341756	0.532378	0.994435	0.485863	0.318275	0.365581	0	0.565507
hsa-mir-6504	0	0	0	0	0	0	0	0	0	0	0	0	0	0	0	0	0	0	0	0	0	0	0	0	0	0	0	0	0.290631	0	0	0	0	0	0	0	0	0	0	0	0	0	0	0.412258	0	0.219784	0	0	0
hsa-mir-6505	0.386867	0	0.286513	0	0	0.237715	0	0	0	0	0	0	0	0	0	0.351701	0	0	0	0	0	0	0	0.578763	0	0	0	0	0	0.500352	0	0	0	0	0	0	0	0	0	0.135506	0	0	0	0	0	0	0	0	0
hsa-mir-6506	0	0	0	0	0	0	0	0	0	0	0	0	0	0	0.726588	0	0	0	0	0	0.851499	0	0	0.578763	0	0	0	0	0	0.500352	0	0	0	0	0.220789	0	0.249311	0	0.232909	0.135506	0.219786	0	0	0	0.263288	0	0	0.282115	0.310287
hsa-mir-6507	0	0	0	0	0	0	0.214479	0	0	0	0	0	0	0.751135	0	0	0	0	0	0	0	0	0	0	0	0	0	0	0	0	0	0	0	0.336305	0	0.263444	0	0.221121	0.232909	0.373436	0.219786	0.341756	0	0	0.263288	0.497126	0.89933	0	0
hsa-mir-6508	0	0	0.286513	0	0	0	0	0.262681	0	0	0	0	0	0	0	0.351701	0	0	0	0	0.851499	0	0	0	0	0	0.885202	0	0	0	0.406994	0	0	0	0	0	0	0	0.232909	0	0	0	0	0	0.263288	0.114074	0.194339	0	0
hsa-mir-6509	1.15718	0	1.06932	1.45141	1.29984	0.441747	0.426694	0.847055	1.10492	0.712084	0.807771	0.367374	1.48111	0	0	1.07331	1.16072	0	0.627355	1.35186	0	2.02637	0	0.578763	0.812745	0.770352	0.885202	0.495159	0.920445	0	1.20394	0	0	0.608844	1.31518	0.263444	1.0921	0.221121	1.6334	0.373436	0	0.849514	0.532378	0.732515	0.678643	0.219784	0.518636	0.282115	0.782292
hsa-mir-651	2.48884	1.48964	1.21296	2.04354	2.588	2.30472	0.510245	0.484822	1.10492	1.82891	1.85868	1.45419	1.99497	0.751135	2.3011	0.634248	1.40467	2.33763	1.39736	0.473115	1.38336	4.53177	0	0.990691	1.86708	1.26985	1.82418	0	1.47788	3.21586	1.97573	1.06317	1.34571	2.30386	2.10682	0.84909	0.958431	0.995543	1.6334	1.25017	0.990857	0.849514	1.4778	1.86637	0.848674	1.10562	1.28806	0.282115	1.65973
hsa-mir-6510	0.386867	0	1.06932	0	0.503572	0.237715	0	0.262681	0.655751	1.18672	0.459696	0.367374	0.675559	1.24259	2.09545	0	0.86694	0.856743	1.06313	0	0	0	0	0.578763	0	0.770352	0.885202	0	0	0	0.406994	1.39741	0	0.608844	0	0	0.249311	0	0	0	0.219786	0	0	0	0	0	0	0.720654	0
hsa-mir-6511a-1	0	0	0	0	0	0	0	0	0	0	0	0	0	0	0	0	0	0	0	0	0	0	0	0	0	0	0	0	0	0	0	0	0	0	0	0	0	0	0	0	0	0	0	0	0	0	0	0	0
hsa-mir-6511a-2	0	0	0	0	0	0	0	0	0	0	0	0	0	0	0	0	0	0	0	0	0	0	0	0	0	0	0	0	0	0	0	0	0	0	0	0	0	0	0	0	0	0	0	0	0	0	0	0	0
hsa-mir-6511a-3	0	0	0	0	0	0	0	0	0	0	0	0	0	0	0	0	0	0	0	0	0	0	0	0	0	0	0	0	0	0	0	0	0	0	0	0	0	0	0	0	0	0	0	0	0	0	0	0	0
hsa-mir-6511a-4	0	0	0	0	0	0	0	0	0	0	0	0	0	0	0	0	0	0	0	0	0	0	0	0	0	0	0	0	0	0	0	0	0	0	0	0	0	0	0	0	0	0	0	0	0	0	0	0	0
hsa-mir-6511b-1	0.691626	1.36858	1.57396	1.45141	1.17195	0.779466	0.775582	1.37721	1.10492	1.18672	1.08798	0.367374	0.675559	0.751135	0.726588	1.40946	0.86694	2.33763	1.66854	0.828799	0.851499	1.15673	0.572121	1.31075	1.32947	1.64018	0	1.15603	0.290631	2.10985	1.39484	1.06317	0	1.20951	0.581218	1.00123	0.811106	0.870418	1.46049	1.12548	1.31095	1.04907	1.589	1.21603	0.263288	0.656229	1.59398	2.00851	1.13735
hsa-mir-6511b-2	0.943099	0	1.21296	1.25569	0.273647	0.441747	0.765612	1.48406	1.72323	1.18672	0	0.659931	0.675559	1.6085	0.726588	0.870418	1.16072	2.5523	0.627355	1.11391	0.851499	0.691319	0.572121	1.98601	0.812745	0	1.82418	0.495159	0.920445	1.61955	0.724074	0.627385	1.01984	1.03568	0.581218	1.13884	0.811106	1.11068	1.78778	1.36493	1.49066	1.5216	1.589	1.57754	0.678643	0.656229	1.00676	0.720654	0.782292
hsa-mir-6512	0	0	0	0	0	0	0	0	0	0	0	0	0	0	0	0	0	0	0	0	0	0	0	0	0	0	0	0	0	0	0	0	0	0	0	0	0	0	0	0.135506	0	0.341756	0	0	0	0	0	0	0
hsa-mir-6513	0	0	0	0.760351	0	0	0.243505	0	0	1.18672	0.459696	0	0	0	0.726588	0	0	0	0.627355	0	0	0	0.572121	0	0.462865	0.770352	0	0.863107	0	0.500352	0.406994	0	1.01984	0	0	0.678994	0.249311	0.221121	0.609383	0.135506	0.219786	0.617859	0.290608	0	0	0.114074	0.194339	0	0.310287
hsa-mir-6514	1.15718	1.09093	0.286513	0	0.503572	0	0.426694	0.262681	0	0	0	0.367374	0	0	0.726588	0	0.86694	0	0	0	0	1.15673	0.572121	0.578763	0	1.64018	0	0.495159	0	0.500352	0.724074	0	0	0.336305	0.41223	0.486129	0	0	0.232909	0.373436	0.219786	0.341756	0.532378	0	0	0.219784	0.194339	0.282115	0.310287
hsa-mir-6515	0	0	0	0.429697	0	0	0.243505	0.484822	0	0	0	0.367374	0	0	0	0.634248	0	0	0	0	0	0	0	0.990691	0	0	0.885202	0	0	0.500352	0	0	0	0.336305	0	0	0	0	0	0	0.410474	0	0	0	0	0.114074	0.194339	0	0
hsa-mir-6516	0.691626	0	0	2.04354	1.03161	0	0.426694	0.677277	0	0.712084	0	0	1.48111	0	0	0.351701	0	0	1.39736	0	0	1.15673	0.572121	0	0	0	0.885202	0.495159	0	0	0	0	1.01984	0.837988	0.41223	0	0.811106	0.733401	0.609383	0.479139	0.578873	1.38061	0.920387	0.994435	0	0.318275	1.10675	0.898329	0
hsa-mir-652	5.39958	4.41563	6.91039	5.85549	4.8364	4.12758	4.30302	5.16786	4.8097	5.27247	3.89572	3.65537	4.80088	5.29479	5.42298	3.833	5.08541	5.37668	4.64202	3.97709	4.50577	5.90729	4.17271	5.50529	5.60475	5.79019	6.15589	5.62405	5.12609	6.46715	5.36065	4.32673	5.12573	6.41394	5.46473	4.36691	6.53416	3.6922	5.15745	4.41186	3.79033	5.02419	4.92868	5.06243	3.51235	3.25657	4.76023	5.06162	5.52705
hsa-mir-653	4.16312	2.87354	3.5564	3.10985	3.01814	2.58868	1.2489	1.92444	3.57692	2.06724	2.00073	1.45419	2.5305	2.69263	3.14676	2.01318	2.66781	1.7794	1.89672	1.35186	1.77109	1.50806	2.55264	2.68465	2.73858	1.93461	3.48082	4.65301	2.0442	2.24215	4.79314	1.39741	0	3.01578	2.10682	1.48701	5.11962	2.10862	3.67113	3.11791	1.98626	2.24555	4.1304	1.99164	1.58598	2.20799	1.52336	2.72583	2.12411
hsa-mir-654	4.53255	4.64145	6.68867	5.35401	4.9084	3.59761	3.08436	5.12722	5.05417	4.62131	5.95806	3.95421	4.97535	5.76243	4.11836	4.51153	4.43261	5.2594	4.02259	5.39708	1.38336	4.64245	4.38922	5.30372	5.8229	4.42391	5.438	4.9299	3.21062	4.16968	5.09777	4.47546	3.68016	5.34484	5.93923	6.367	4.05806	4.83269	5.48545	5.24149	5.59674	5.17057	6.60259	5.15908	5.42775	4.602	5.94402	4.7153	6.10658
hsa-mir-655	2.40755	2.82835	2.96539	2.26797	2.53699	1.81054	1.05465	2.67628	1.44695	1.54325	2.64467	1.11104	1.48111	2.83755	1.85554	1.07331	1.40467	1.39061	0.627355	2.7701	2.07639	1.50806	2.96604	1.79404	2.8935	3.24309	3.10822	1.78946	1.96394	0.871148	1.97573	2.80578	1.34571	1.36464	3.69005	2.1394	1.0921	2.10862	1.9922	1.6629	2.56969	1.38061	3.06422	1.57754	2.32315	1.75963	1.72561	2.4113	2.9028
hsa-mir-656	2.02698	1.60132	0.730372	1.77764	1.03161	1.1724	0.999617	0.998941	0.655751	0	0.807771	0.659931	0.675559	1.90013	0.726588	0.634248	0.86694	0.856743	0	0.473115	0	0	0	0	1.53176	1.26985	0.885202	0.495159	0.532417	0	1.39484	0	0	0.336305	1.79932	0.486129	0.811106	0.581993	0.907669	0.756464	1.21194	0.341756	1.4778	0.994435	1.00076	0.656229	1.00676	0.898329	0.782292
hsa-mir-657	0	0	0	0	0	0	0	0.484822	0	0	0	0	0	0	0	0	0	0	0	0	0	0	0	0	0	0	0	0	0	0	0	0	0	0	0	0	0	0	0	0	0	0	0	0	0	0	0	0	0.310287
hsa-mir-658	0	0	0.286513	1.62373	0.273647	0	0	0	0	0	0	0	1.13385	0	0.726588	0	0	0	0	0	0	0	0.572121	0.990691	0	0	0	0.863107	0	0	0	1.06317	0	0.837988	0	0.263444	1.0921	0.221121	0.766222	0.135506	0.578873	0	0.290608	1.21603	0.263288	0.219784	0.194339	0.517984	0
hsa-mir-659	0.943099	1.48964	2.24328	2.26797	1.17195	0	0.755571	0.677277	2.15465	1.54325	0.807771	1.29279	0.675559	0.751135	1.85554	1.07331	1.40467	1.39061	2.09369	0.473115	1.38336	2.22914	0	2.44417	1.70914	0	0.885202	2.22814	1.22592	1.16586	1.20394	0	2.02966	1.74961	0.732472	0	1.43176	0.221121	1.36559	0.756464	1.4036	1.65002	1.4778	1.57754	0.678643	0.729651	1.00676	1.7552	1.42206
hsa-mir-660	7.53072	6.47448	4.56242	5.73849	7.23604	6.20407	6.37651	5.83586	5.98064	5.34222	4.76912	4.94815	6.66295	5.13569	5.95161	4.40277	4.28801	5.28963	6.21992	4.91206	4.34376	5.87743	3.96359	5.53631	4.01177	4.90367	5.64752	5.68273	5.23269	4.03022	4.66925	4.47546	6.4984	5.26829	6.66833	4.90927	6.36618	4.71933	5.41017	4.3917	4.52677	5.05931	5.33183	5.91977	4.89871	4.74609	4.7448	5.7234	4.33602
hsa-mir-661	0	0	0	0	0	0	0	0	0	0	0	0	0	0	0	0	0	0	0	0	0	0	0	0	0	0	0	0	0	0	0	0	0	0	0	0	0	0	0	0	0	0	0	0	0	0	0	0	0
hsa-mir-662	0	0	0	0	0.273647	0	0	0	0	0	0	0	0	0	0	0	0	0	0	0	0	0	0	0	1.09412	0	0	0	0	0	0	0	0	0	0	0	0	0	0	0	0	0	0	0	0	0	0	0	0
hsa-mir-663a	0	0	0	0	0	0	0	0	0	0	0	0	0	0	0	0	0	0	0	0	0	0	0	0	0	0	0	0	0	0	0	0	0	0	0	0	0	0	0	0	0	0	0	0	0	0	0	0	0
hsa-mir-663b	0	0	0	0	0	0	0	0	0	0	0	0	0	0	0	0	0	0	0	0	0	0	0	0	0	0	0	0	0	0	0	0	0	0	0	0	0	0	0	0	0	0	0	0	0	0	0	0	0
hsa-mir-664a	4.43336	4.70534	4.79712	4.27712	4.9184	5.65644	4.94142	5.08541	5.00331	3.97066	4.50872	4.2683	4.76964	4.42583	4.11836	4.45818	4.61341	4.99168	5.38732	4.75504	4.45376	3.79804	4.54773	4.19179	4.10985	3.24309	5.28969	5.37636	4.11201	4.62234	4.63181	4.95242	5.48146	4.57526	5.01883	4.94724	5.07994	4.98382	4.43789	3.78682	4.64535	4.88757	5.41718	5.26216	4.17136	4.49025	5.04494	4.44186	4.62967
hsa-mir-664b	2.13194	2.68359	2.3713	2.98896	1.97234	2.99744	2.10595	3.23077	1.95501	2.4508	2.46023	1.73119	1.7608	2.1426	1.20754	1.80098	2.35585	2.33763	1.66854	2.16766	2.32823	1.15673	1.7797	2.307	1.09412	2.38795	2.95906	2.0962	0.920445	1.96418	2.09058	1.66859	2.02966	2.30386	2.76298	2.96562	1.86431	1.57902	2.22628	1.41907	2.40015	2.72536	3.27844	3.26302	2.4342	1.92505	2.5614	2.4113	2.53582
hsa-mir-665	0.386867	0.293986	1.77255	0.429697	0	0	0	0.262681	0	1.18672	1.32251	0	0	0.751135	0	0.634248	0.497633	0	0.627355	1.35186	0	0	0	0.990691	1.32947	1.26985	0	0	0.532417	0.500352	0	0.627385	0.59822	1.03568	1.40801	0.678994	0.46182	0.581993	0.766222	0.373436	1.10563	1.04907	1.589	0.412258	0.678643	0.41047	1.10675	1.55767	1.28672
hsa-mir-668	0	0.293986	0	0	0	0	0	0	0	0	0	0	0	0	0	0	0	0	1.06313	0.473115	0	0	0	0.578763	0	0	0	0	0	0	0	0	0	0.336305	0	0	0	0	0.232909	0.135506	0	0	0	0	0.263288	0.114074	0.194339	0.282115	0
hsa-mir-670	0.691626	0	0	0	0	0	0	0	0	0	0	0	0	0	0	0	0	0	0	0	0	0	0	0	0	0	0	0	0	0	0	0	0	0	0	0.263444	0	0	0.232909	0	0	0	0	0	0	0	0	0	0
hsa-mir-671	4.18768	2.52268	3.6093	3.79048	3.01814	3.2894	2.49846	3.32002	3.35148	1.82891	2.35833	0.903046	1.99497	1.90013	3.03596	1.55211	2.66781	3.3104	2.09369	1.73492	2.32823	3.51739	2.29091	2.98367	1.53176	4.2205	2.95906	2.66065	1.69231	2.36334	3.29276	1.66859	3.49531	4.08862	2.95981	2.3805	2.85301	1.86798	3.26077	2.24554	2.72139	3.03862	4.07417	3.26302	1.76661	1.61211	2.45159	3.33214	3.64591
hsa-mir-6715a	0.943099	0.538086	0.909778	1.77764	1.03161	0	0.126884	0	0	0	0.459696	0	0	0	0	0	0	0	1.06313	0.473115	0	0	0	0	0	0	0	1.78946	0	0	0	0	0	0	0.220789	1.76727	1.32718	2.05211	3.90845	1.52159	0.219786	0	0.290608	0.994435	0	0	1.10675	0.282115	0
hsa-mir-6715b	0.943099	0	0.286513	0.760351	0.503572	0.779466	0.126884	0.262681	0	0.712084	0	0.367374	1.13385	1.24259	0	0	0	0	0	1.35186	0	1.79037	0	0.578763	0	0	0	0	0	0	0.724074	0	0	0.336305	0.581218	0	0	0.221121	0	0.756464	0	1.04907	0	0.412258	0	0.114074	0.518636	0	0
hsa-mir-6716	0	0.746801	0.730372	0.760351	0.273647	0.922669	0.243505	0.847055	0.655751	0	0	0	0	0	0	1.25116	0	1.39061	0	0.473115	0	1.15673	0	0.578763	1.32947	0.770352	0.885202	0.495159	0.290631	0	0.406994	0	0.59822	0.608844	1.31518	0.263444	0	0	1.26401	0.838204	0.866159	0.341756	0.920387	0.412258	1.26392	0.799516	0.518636	0.720654	0.565507
hsa-mir-6717	0	0	0	0	0	0	0	0	0	0	0	0	0	0	0	0	0	0	0	0	0	0	0	0	0	0	0	0	0	0	0.406994	0	0	0	0	0	0	0	0	0	0	0.341756	0.290608	0	0	0	0	0	0
hsa-mir-6718	0.691626	0	1.06932	1.77764	0.503572	0.620465	0.214479	0.262681	1.44695	0	1.70111	1.29279	1.13385	1.6085	0.726588	0.351701	0.86694	0.856743	0	1.35186	0	1.15673	0.572121	1.31075	1.09412	1.26985	1.42977	0.495159	0.739437	1.16586	1.20394	0.627385	1.01984	0.837988	2.40589	0.84909	0	0.221121	1.36559	0.135506	0.866159	0.849514	0.739388	0.732515	0.485863	0.799516	0.89933	1.7552	0.782292
hsa-mir-6719	0	0	0	0	0	0	0	0	0	0	0	0	0	0	0	0	0	0	0	0	0	0	0	0	0	0	0	0	0	0	0	0	0	0	0	0	0	0	0	0	0	0	0	0	0	0	0	0	0
hsa-mir-6720	0.943099	1.09093	0.286513	0.429697	1.52594	0.441747	0.841589	1.92444	0.655751	1.18672	1.32251	0.659931	1.13385	0	0	1.80098	0	0	0	0.828799	0	0.691319	0	0.990691	0	3.24309	1.42977	0	0.290631	1.16586	0.724074	1.06317	0	0	0.732472	0.678994	0.958431	1.93201	0.433392	0.988978	1.21194	0.849514	0.532378	0.994435	1.00076	1.04938	1.52336	0.282115	0.310287
hsa-mir-6721	0.386867	0.293986	0.525446	0	0	0	0	0.262681	0	0	0	0	0	0	0	0	0	0	0	0	0	0	0	0	0	0	0	0.495159	0	0	0	0	0	0	0	0	0	0	0	0	0	0	0	0	0	0	0.194339	0.282115	0
hsa-mir-6722	0	0	0	0	0	0	0	0	0	0	0	0	0	0	0	0	0	0	0	0	0	0	0	0	0	0	0	0	0	0	0	0	0	0	0	0	0	0	0	0	0	0	0	0	0	0	0	0	0
hsa-mir-6723	0.943099	0.293986	0	0.429697	0	0	0	0	0	0	0	0.367374	0.675559	0	0.726588	0	0	0	0	0	0.851499	0	0	0.578763	0.462865	0.770352	0	0	0	0.500352	0	0	0	0.336305	0.41223	0	0.249311	0	0.433392	0.25937	0	0	0	0	0	0	0	0	0
hsa-mir-6724-1	0	0	0	0	0	0	0	0	0	0	0	0	0	0	0	0	0	0	0	0	0	0	0	0	0	0	0	0	0	0	0	0	0	0	0	0	0	0	0	0	0	0	0	0	0	0	0	0	0
hsa-mir-6724-2	0	0	0	0	0	0	0	0	0	0	0	0	0	0	0	0	0	0	0	0	0	0	0	0	0	0	0	0	0	0	0	0	0	0	0	0	0	0	0	0	0	0	0	0	0	0	0	0	0
hsa-mir-6724-3	0	0	0	0	0	0	0	0	0	0	0	0	0	0	0	0	0	0	0	0	0	0	0	0	0	0	0	0	0	0	0	0	0	0	0	0	0	0	0	0	0	0	0	0	0	0	0	0	0
hsa-mir-6724-4	0	0	0	0	0	0	0	0	0	0	0	0	0	0	0	0	0	0	0	0	0	0	0	0	0	0	0	0	0	0	0	0	0	0	0	0	0	0	0	0	0	0	0	0	0	0	0	0	0
hsa-mir-6726	0.386867	0	0	0	0.273647	0	0.126884	0	0	0	0	0	0	0	0	0.351701	0	0.856743	0	0	0.851499	0	0	0	0	0	0	0	0.290631	0	0	0	0	0	0.220789	0	0.249311	0	0.232909	0	0.410474	0.341756	0.739388	0.732515	0	0	0.194339	0.517984	0
hsa-mir-6727	0	0	0.286513	0.760351	0	0	0.126884	0	0.655751	0.712084	0.459696	0	0	0	0	0	0	0	0	0	0	0	0	0	0	0	0	0	0	0	0	0	0	0	0	0	0	0	0	0	0	0	0	0	0	0	0	0	0
hsa-mir-6728	0	0.538086	1.06932	0.429697	0	0.237715	0.111221	0	0.655751	0	0.459696	0	0	0	0.726588	0	0	0	0	0	0	0	0	0.578763	0	0.770352	0.885202	0.495159	0	0	0	0	0	0	0.581218	0	0	0	0	0	0	0	0	0	0	0	0	0	0
hsa-mir-6729	0.386867	0	0	0	0	0	0	0.262681	0	0	0	0	0	0	0	0	0	0	0	0	0	0	0	0	0	0.770352	0	0	0	0	0	0	0	0	0	0	0	0	0	0	0	0	0	0	0	0	0	0	0.310287
hsa-mir-6730	0.386867	0.293986	0	0.760351	0	0.237715	0	0	0	0	0	0	0.675559	0	0	0	0	0	0	0	0	0	0	0.578763	0.462865	0	0.885202	0.495159	0	0	0.406994	0	0	0	0.220789	0.263444	0.249311	0.221121	0.433392	0.25937	0.729655	0	0.532378	0	0.678643	0	0.194339	0	0
hsa-mir-6731	0	0.293986	0	0	0	0	0.243505	0	0	0	0	0	0	0	0	0	0	0	0	0	0	0	0	0	0	0	0	0.495159	0	0	0	0.627385	0	0.336305	0.41223	0.263444	0.249311	0	0.232909	0	0	0	0.290608	0	0.263288	0	0	0	0
hsa-mir-6732	0	0	0.286513	0	0	0.441747	0	0	0	0	0	0	0	0	0	0	0	0	0.627355	0.473115	0	0	0	0	0	0	0	0	0	0	0	0	0	0	0	0	0	0	0	0	0	0	0	0	0	0	0	0.282115	0
hsa-mir-6733	0	0.538086	0.909778	1.25569	0.701841	0	0.338005	0.484822	1.10492	0.712084	0	0.367374	0.675559	0	0	0	0	0	1.66854	1.11391	0.851499	0.691319	0.572121	0.578763	0.812745	1.26985	0	0.863107	0.290631	0.500352	0	0	0.59822	0.837988	0.732472	0	0.249311	0.581993	0.232909	0.135506	0.219786	0.341756	0.290608	0	0	0.219784	0.194339	0.282115	0.310287
hsa-mir-6734	0	0.293986	0	0.760351	0	0.620465	0.126884	0.847055	0.655751	0	0	0	0	0	0	0	0.497633	0	0	0.473115	0	0	0	0	0.462865	0.770352	0	0	0	0	0	0	0.59822	1.03568	0.41223	0.263444	0.249311	0.221121	0.232909	0	0	0.617859	0.532378	0	0	0.114074	0.365581	0	0.310287
hsa-mir-6735	0.691626	0	0.286513	0	0.273647	0	0	0.677277	0	0	0	0	0	0	0	0	0	0	0	0	0	0	0	0	0	0	0	0	0.290631	0	0	0	0	0.336305	0	0	0	0	0	0	0	0	0	0	0	0	0	0	0
hsa-mir-6736	0	0	0	0.429697	0	0	0	0	0	0	0	0	0.675559	0	0	0	0	0	0	0	0	0	0	0	0	0	0	0	0.290631	0	0	0	0	0	0	0	0	0	0	0	0	0	0	0	0	0	0	0	0.310287
hsa-mir-6737	0.691626	0	0.286513	0	0.273647	0	0.111221	0.484822	0	0	0	0	0	0.751135	0	0.351701	0.497633	0	0	0.473115	0	0	0.572121	0.578763	0	0	0	0	0.290631	0	0	0	0	0.837988	0.41223	0	0	0.221121	0.232909	0.25937	0.219786	0	0.532378	0.412258	0	0.114074	0.194339	0.282115	0
hsa-mir-6738	0	0	0	0	0	0	0	0	0.655751	0	0	0	0	0	0	0	0	0	0	0	0	0	0	0	0	0	0	0	0	0.500352	0	0	0	0.336305	0	0	0	0.221121	0.433392	0	0	0	0.290608	0.412258	0	0	0	0	0
hsa-mir-6739	0.386867	0.293986	0	0.429697	0	0	0	0	0	0	0	0	0	0	0	0	0	0.856743	0	0	0	0	0	0.578763	0	0	0	0	0	0	0	0	0	0	0	0	0.46182	0	0	0	0	0	0.290608	0.412258	0	0	0	0.282115	0
hsa-mir-6740	0	0	0.525446	0	0	0	0.111221	0.262681	0	0	0	0	0	0	0	0	0	0	0.627355	0	0	0	0	0	0	0.770352	0	0	0	0	0.406994	0	0	0	0.220789	0	0	0	0.232909	0	0	0	0	0	0	0	0.657	0	0
hsa-mir-6741	0	0	0	0	0	0	0	0	0	0	0	0	0	0	0	0	0	0	0	0	0	1.15673	0	0.578763	0.462865	0	0	0.495159	0	0	0	0	0	0.336305	0	0	0	0	0	0	0.410474	0	0.290608	0.412258	0	0	0	0.282115	0.310287
hsa-mir-6742	0	0	0	0	0	0	0	0	0	0	0	0	0	0	0	0	0.497633	0	0	0	0	0.691319	0	0	0.462865	0	0	0	0	0	0	0	0	0.336305	0	0	0.249311	0	0.232909	0.135506	0	0	0	0	0	0	0	0	0
hsa-mir-6743	0.386867	0	0	0	0	0	0.126884	0	0	0	0	0	0	0	0	0	0	0	0.627355	0	0	0	0	0	0	0	0	0	0	0	0	0	0	0.336305	0	0	0	0	0	0	0	0	0	0	0	0	0	0	0
hsa-mir-6744	0.691626	0	0.286513	0	0	0.237715	0	0	0	1.82891	0	0	0	0	0.726588	0	0	0	0	0	0	0	0	0	0	0	0	0.495159	0	0	0	0	0	0.608844	0	0	0.647008	0	0	0	0	0	0	0	0	0	0	0	0
hsa-mir-6745	0	0	0	0	0	0	0	0	0	0	0	0	0	0	0	0	0	0	0.627355	0	0	0	0	0	0	0	0	0	0	0	0	0	0	0	0	0	0	0	0	0	0	0	0	0	0	0	0	0	0
hsa-mir-6746	0	0	0	0	0	0	0	0	0	0	0	0	0	0.751135	0	0.351701	0	0	0	0	0	0	0	0	0	0	0	0.495159	0	0	0	0	0	0	0	0	0	0	0.232909	0	0	0	0	0	0	0.114074	0	0	0
hsa-mir-6747	0.386867	0	0.525446	0.760351	0	0	0	0.262681	0.655751	0.712084	0	0	0.675559	0	1.20754	0	0	0	0	0	0	0	0	0	0	0	0	0	0	0	0.406994	0	0	0	0	0	0	0	0.609383	0	0	0	0.532378	0.412258	0	0	0.657	0	0.310287
hsa-mir-6748	0.386867	0	0.730372	0	0	0	0.126884	0	0	0	0	0	0	0	0	0	0.86694	0.856743	0	0	0	0	0	0.578763	0	0	0.885202	0	0	0	0.406994	0	0	0	0.41223	0.263444	0	0.412811	0.433392	0	0.219786	0.341756	0.532378	0.732515	0	0.219784	0	0.282115	0.310287
hsa-mir-6749	0	0	0.525446	0.429697	0	0	0	0	0	0	0	0	0	0	0	0	0	0	0	0	0	0	0	0	0	0	0	0	0	0	0	0	0.59822	0.336305	0	0.263444	0	0	0	0	0	0	0	0	0	0	0	0	0
hsa-mir-675	6.47508	2.82835	6.51935	3.22139	2.98046	5.40523	4.34698	2.5343	4.89588	4.95392	3.52445	1.85201	2.5305	5.29479	2.91594	4.20101	5.21904	4.51699	2.42165	3.47128	3.61603	3.16862	2.66762	3.50652	4.36949	2.73237	5.87277	3.68648	2.66816	3.7029	2.70943	4.51036	4.92074	3.42132	3.8475	3.48766	2.73534	4.06485	5.49669	5.02731	4.95952	4.41377	5.18025	0.994435	0.485863	3.26894	3.90568	5.04284	4.8853
hsa-mir-6750	0	0.293986	0	0	0	0	0	0	0	0	0	0.367374	0	0	0	0.351701	0	0.856743	0	0	0	0	0.572121	0.578763	0	0	0	0.863107	0	1.16586	0	0	0	0	0	0	0.46182	0	0	0.135506	0	0	0.290608	0	0	0	0	0.898329	0
hsa-mir-6751	0	0.293986	0	0	0.273647	0	0.111221	0	0	0	0	0	0	0	0	0	0	0	0	0	0.851499	0	0	0	0	0.770352	0	0	0	0	0	0	0.59822	0	0	0.486129	0	0.221121	0	0	0	0	0	0	0	0.114074	0.194339	0.282115	0.310287
hsa-mir-6752	0	0	0	0	0	0	0	0	0	0	0	0	0	0	0	0	0	0	0	0	0	0	0	0	0	0	0	0	0	0	0	0	0	0	0	0	0	0	0	0	0	0	0	0	0	0	0	0	0
hsa-mir-6753	0	0	0	0	0	0	0	0	0	0	0	0	0	0	0	0	0	0	0	0	0	0	0	0	0	0	0	0	0	0	0.406994	0	0	0	0	0	0	0	0	0	0	0	0	0	0	0	0	0	0
hsa-mir-6754	0	0.293986	0.286513	0	0	0	0	0.677277	0	0	0	0	0	0	0	0	0	0	0	0	0	0	0	0	0	0	0	0.495159	0	0	0	0	0	0	0	0	0	0	0	0	0	0.341756	0.290608	0	0	0	0	0	0
hsa-mir-6755	0.691626	0.538086	0.525446	1.02917	1.41731	0.779466	0.426694	0	0.655751	0.712084	0.807771	0.367374	0	0.751135	0	1.07331	0.86694	0.856743	1.89672	0	0	1.15673	0	0.578763	1.32947	0.770352	0	1.78946	0.532417	0.500352	0.724074	0	1.34571	0.336305	0.99438	0.263444	0.249311	0.221121	0.907669	0.135506	0.219786	0	0.532378	0.412258	1.00076	0.318275	0.365581	0	0.565507
hsa-mir-6756	0	0	0	0	0	0	0	0	0	0	0	0	0	0	0	0	0	0	0	0	0	0	0	0	0	0	0	0	0	0	0	0	0	0	0	0	0	0	0	0.135506	0	0	0	0	0	0.114074	0	0	0
hsa-mir-6757	0	0	0	0	0	0	0	0	0	0	0	0	0	0	0	0	0	0	0	0	0	0	0	0	0	0	0	0	0	0	0	0	0	0	0.220789	0	0	0	0.232909	0	0	0	0	0	0	0	0	0	0
hsa-mir-6758	0.386867	0	0	0	0	0	0	0	0	0	0	0	0	0	0	0	0	0	0	0	0	0	0	0	0	0	0	0	0	0	0	0	0	0	0	0	0	0	0	0	0	0	0	0	0	0	0.365581	0	0.310287
hsa-mir-6759	0	0	0	0	0	0	0	0	0	0	0	0	0	0	0	0	0	0	0	0	0	0	0	0	0	0	0	0	0	0	0	0	0	0	0	0	0	0	0	0	0	0	0	0	0	0	0	0.282115	0
hsa-mir-676	1.15718	0	0.525446	1.45141	0.503572	0	0.214479	0	1.44695	0	0.459696	0.659931	0.675559	0.751135	1.20754	0	0.86694	0	0	0.473115	0.851499	0	1.7797	2.15542	1.70914	0.770352	1.42977	1.15603	0.739437	1.16586	2.55797	0	0.59822	1.50469	0.41223	0.84909	0	0.870418	0.433392	1.05884	0.729655	0.341756	2.26112	0	0.263288	0.656229	1.10675	0.517984	0.970717
hsa-mir-6760	0	0	0	0	0	0	0	0	0	0	0	0	0	0	0	0	0	0	0	0	0	0	0	0	0	0	0	0	0	0	0	0	0	0	0	0	0	0	0	0	0	0	0	0	0	0	0	0	0
hsa-mir-6761	0	0.746801	2.48889	1.77764	0.503572	0.779466	0.685409	1.84647	2.48633	2.4508	1.08798	0.659931	0.675559	0	1.85554	1.07331	1.40467	2.08535	2.56134	0.473115	0	2.56513	0	0.990691	1.86708	1.26985	3.86318	1.78946	1.3574	0	1.85094	1.06317	2.61788	2.58204	0.869361	1.48701	1.32718	0.581993	2.5621	0.988978	0.729655	1.76794	1.87887	1.99164	0.678643	0.656229	1.37083	2.28912	1.28672
hsa-mir-6762	0	0	0	0.429697	0	0.441747	0	0.484822	0	0	0	0.367374	0	0	0	0	0.497633	0	0	0	0	0	0	0	0	1.26985	0	0.495159	0	0.500352	0	1.06317	0	0.608844	0.220789	0	0.249311	0	0.232909	0.25937	0.410474	0	0	0	0	0.114074	0	0	0.310287
hsa-mir-6763	0	0	0	0	0.273647	0	0	0.262681	0	0	0	0	0	0	0	0	0	0	0	0	0	0	0	0	0	0	0	0	0	0	0.724074	0	0.59822	0	0	0	0	0	0	0	0	0	0	0	0	0	0.194339	0	0.310287
hsa-mir-6764	0	0	0	0.429697	0	0.237715	0	0.262681	0	0	0	0	0	0	0	0	0	0	0	0	0	0	0	0	0	0	0	0	0	0	0.406994	0	0	0.336305	0.41223	0.263444	0	0	0	0.135506	0	0	0	0.732515	0	0	0	0.282115	0.310287
hsa-mir-6765	0	0	0	0	0	0	0	0	0	0	0	0	0	0	0	0	0	0	0	0	0	0	0	0	0	0	0	0	0	0	0	0	0	0	0	0	0	0	0	0	0	0	0	0	0	0	0	0	0
hsa-mir-6766	0.386867	0.293986	0	0	0	0	0	0	1.10492	0	0	0	0	0	0	0	0.86694	0	0	0	0	0	0	0	0	0	0	0	0.290631	0	0	0	0	0	0	0.486129	0.46182	0	0	0.135506	0.219786	0	0	0	0	0	0.194339	0	0
hsa-mir-6767	0.691626	0	0.286513	0	0	0	0	0	0	0	0	0	0	0	0	0	0	0	0	0	0	0.691319	0	0	0	0	0	0	0	0	0	0	0	0	0.220789	0	0	0	0	0	0	0	0.290608	0	0	0	0	0	0
hsa-mir-6768	0	0	0	0	0	0	0	0	0	0	0	0	0	0	0	0	0	0	0	0	0	0	0	0	0	0	0	0	0	0	0	0	0	0	0	0	0	0	0.232909	0	0	0	0	0	0	0	0	0	0
hsa-mir-6769a	0	0	0	0	0	0	0	0.262681	0	0.712084	0.459696	0	0	0	0	0	0	0	0	0	0	0	0	0	0	0	0	0	0	0	0	0	0	0	0.220789	0.263444	0.249311	0	0.232909	0	0	0	0	0	0	0.114074	0	0	0
hsa-mir-6769b	0.386867	0	0	0	0	0	0	0	0	0	0	0	0	0	0	0	0	0	0	0	0	0	0	0	0	0	0	0	0	0	0	0	0	0.336305	0	0	0	0	0	0.135506	0	0	0.290608	0	0	0	0	0.282115	0
hsa-mir-6770-1	0	0	0	0	0	0	0	0	0	0	0	0	0.675559	0	0	0	0	0	0	0	0	0	0	0	0	0	0	0	0	0	0	0	0	0	0	0	0	0	0	0	0	0	0	0	0	0	0	0	0
hsa-mir-6770-2	0	0	0	0	0	0	0	0	0	0	0	0	0	0	0	0	0	0	0	0	0	0	0	0	0	0	0	0	0	0	0	0	0	0	0	0	0	0	0	0	0	0	0	0	0	0	0	0	0
hsa-mir-6770-3	0	0	0	0	0	0	0	0	0	0	0	0	0	0	0	0	0	0	0	0	0	0	0	0	0	0	0	0	0	0	0	0	0	0	0	0	0	0	0	0	0	0	0	0	0	0	0	0	0
hsa-mir-6771	0	0	0	0.429697	0	0	0	0	0	0	0	0	0	0	0	0	0	0	0	0	0	0	0	0	0	0	0	0	0	0	0	0	0	0.336305	0	0.486129	0	0	0	0	0	0	0	0	0	0	0	0	0
hsa-mir-6772	0	0	0.286513	0	0.273647	0.237715	0.111221	0	0	0	0	0	0	0	0	0	0	0	0.627355	0.473115	0	0	0	0	0	0	0	0	0	0	0	0	0	0.336305	0	0	0	0	0	0	0	0	0.290608	0	0	0	0.194339	0	0.565507
hsa-mir-6773	0	0.293986	0	0	0	0.441747	0.126884	0	0	0	0.459696	0	0	0	0	0	0	0	1.06313	0	0	0	0	0	0	0	0	0	0	0	0	0	0.59822	0	0	0	0	0	0	0	0	0	0.290608	0	0	0	0	0	0
hsa-mir-6774	0	0.293986	0.286513	0	0	0	0	0	0.655751	0	0	0	0.675559	0	0	0	0	0	0	0	0	0	0	0.990691	0	1.26985	0.885202	0.495159	0	0	0.724074	0	0.59822	0	0.220789	0	0	0	0.232909	0	0	0	0.532378	0.412258	0.263288	0	0.365581	0.282115	0.310287
hsa-mir-6775	0	0	0	0	0	0	0	0	0	0	0	0	0	0	0	0	0	0	0	0	0	0	0	0	0	0	0	0	0	0	0	0	0	0.336305	0	0	0	0	0	0	0	0	0	0	0	0.114074	0	0	0
hsa-mir-6776	0	0	0.525446	0.429697	0	0.237715	0	0	0	0	0	0	0	0	0	0	0	0	0	0	0	0	0	0	0.462865	1.64018	0	0	0	0	0	0	0	0	0	0	0	0	0	0	0	0	0	0	0	0	0	0	0
hsa-mir-6777	0.691626	0	1.06932	0	0.273647	0	0.243505	0.262681	0.655751	0.712084	0	0	0	0.751135	0	0	0	0.856743	0	0	0	1.50806	0	0	0.462865	0.770352	0	0.495159	0	0	0	0	0	0.336305	0.220789	0.263444	0.958431	0.412811	0	0	0.219786	0	0	0	0.263288	0	0.194339	0	0
hsa-mir-6778	0	0	0	0	0	0	0	0	0	0	0	0	0	0	0	0	0	0	0	0	0	0	0	0	0.462865	0	0	0	0	0	0	0	0	0	0	0	0.249311	0	0	0	0	0	0	0	0	0	0	0	0
hsa-mir-6779	0	0	0.286513	0	0	0.237715	0	0	0	0	0	0	0.675559	0	0	0.351701	0	0	0	0	0	0	0	0	0	0	0	0	0	0.500352	0.983867	0.627385	0	0	0	0	0.249311	0	0.232909	0.135506	0.410474	0	0	0	0	0	0.194339	0.720654	0
hsa-mir-6780a	0	0	0	0.429697	0	0	0	0	0	0	0	0	0	0	0	0	0	0	0	0	0	0	0	0	0	0	0	0	0	0	0.406994	0	0	0	0	0	0	0	0	0	0	0	0	0	0	0	0	0	0
hsa-mir-6780b	0	0	0	0	0	0	0	0	0	0.712084	0	0	0	0	0	0	0	0	0	0	0	0	0	0	0.462865	0	0	0	0	0	0	0	0	0	0	0.263444	0	0	0	0	0	0	0	0	0	0	0	0	0
hsa-mir-6781	0.386867	0	0	0	0.273647	0.237715	0	0	0	0	0	0	0	0	0.726588	0	0	2.08535	0	0	0	0	0	0.990691	0	0	0.885202	0	0	0	0.406994	1.06317	0	0	0.41223	0	0.249311	0.221121	0.433392	0.25937	0	0	0.290608	0.412258	0	0	0.194339	0	0.310287
hsa-mir-6782	0	0	0.286513	0	0	0	0	0.262681	0	0	0	0	0	0	0	0	0	0	0	0	0	0	0	0	0	0	0	0.495159	0	0	0	0	0	0	0	0	0	0	0	0	0	0.341756	0.290608	0	0	0	0.365581	0	0
hsa-mir-6783	0.386867	0.293986	0.730372	0.760351	0.273647	0.441747	0.243505	0.262681	1.72323	0	0.807771	0	0	0	0	0.351701	0	0	0	0	0	1.50806	0	0	0.462865	1.26985	0	0	0	0	0.724074	0	0	0.336305	0.581218	0	0.647008	0	0.766222	0.25937	0	0.341756	0	0	0	0	0.194339	0.282115	0.310287
hsa-mir-6784	0	0	0	0	0	0	0	0	0	0	0	0	0	0	0	0	0	0	0	0	0	0	0	0	0	0	0	0	0	0.500352	0.406994	0	0	0	0	0	0	0	0	0	0.219786	0	0	0	0	0	0	0.282115	0
hsa-mir-6785	0.386867	0	0	0.429697	0.273647	0	0	0	0	0	0	0	0	0	0.726588	0.351701	0	0	0	0	0	0	0	0	0	0	0	0	0	0	0	0	0	0	0	0	0	0	0	0	0	0.341756	0	0	0	0	0	0	0
hsa-mir-6786	0	0	0.286513	0	0	0.237715	0	0	0	0	0	0	0	0	0	0	0	0	0	0	0	0	0	0	0	0	0	0.495159	0	0	0	0	0	0	0	0	0	0	0.232909	0	0	0	0	0	0	0	0	0	0
hsa-mir-6787	0	0	0.286513	0.429697	0	0	0	0	0	0	0	0	0	0.751135	0	0.351701	0	0	0	0	0	0	0	0	0	0.770352	0	0	0	0	0	0.627385	0	0	0	0	0	0	0	0	0	0	0.290608	0	0.263288	0	0	0	0
hsa-mir-6788	0	0	0.730372	0.760351	0	0	0	0	0	0	0	0	0.675559	0	0	0	0	0	0	0	0	0	0	0	0.462865	0	0	0	0.290631	0	0	0	0	0	0	0.486129	0	0	0.232909	0.373436	0.219786	0.341756	0	0	0	0	0	0	0
hsa-mir-6789	0	0	0.286513	0.429697	0	0.237715	0	0	0	0	0	0	0	0	0	0	0	0	0	0	0	0	0	0	0	0.770352	0	0	0	0	0	0.627385	0	0	0	0	0.249311	0	0	0	0	0	0	0	0	0	0	0	0
hsa-mir-6790	0	0	0	0	0	0	0	0	0	0	0	0	0	0	0	0	0	0	0	0	0	0	0	0	0	0	0	0	0	0	0	0	0	0	0	0	0	0	0	0	0	0	0	0	0	0	0	0	0
hsa-mir-6791	0	0	0	0.429697	0.273647	0.237715	0	0	0	0	0	0	0	0	0	0	0	0	0	0	0	0	0	0	0	0	0	0	0	0	0	0	0	0	0	0	0	0	0	0	0	0	0	0	0	0	0	0	0
hsa-mir-6792	0	0	0	0	0	0	0	0	0	0	0	0	0	0	0	0.351701	0	0	0	0	0	0	0	0	0	0	0	0	0	0	0	0	0	0	0	0	0	0	0	0	0	0	0.290608	0	0	0	0	0	0
hsa-mir-6793	0.691626	0	0.286513	0.429697	0	0.441747	0.338005	0.847055	0	1.54325	0	0	0	0	0	0	0	0.856743	0	0	0	0	0	0.990691	0	0	0.885202	1.15603	0.290631	0	0.724074	0	1.01984	0.608844	0	0	0.249311	0.221121	0.433392	0.25937	0.219786	0.617859	0.290608	0.994435	0	0.219784	0.194339	0.282115	0.310287
hsa-mir-6794	0	0	0	0	0	0	0	0	0	0	0	0	0	0	0	0	0	0	0	0	0	0	0.572121	0	0	0.770352	0	0	0	0	0	0	0	0	0	0	0	0	0.232909	0	0	0	0	0	0	0	0	0	0
hsa-mir-6795	0	0	0	0	0	0	0	0	0	0.712084	0	0	0	0	0	0	0	0	0	0	0	0	0	0	0	0	0	0	0	0	0	0	0	0	0	0	0	0	0	0	0	0	0	0	0	0	0	0	0
hsa-mir-6796	0.386867	0	0	0	0	0	0.111221	0	0	0	0.459696	0	0	0	0	0	0	0	0	0	0	0	0	0	0	0	0	0	0	0	0	0	0	0	0	0	0	0	0	0	0	0	0.290608	0	0	0	0	0	0.310287
hsa-mir-6797	0.386867	0	0.525446	0	0	0.237715	0.126884	0.262681	0	0	0	0	0	0	0	0.351701	0	0	0	0	0	0.691319	0	0	0.462865	1.26985	0	0	0	0	0.724074	0.627385	0	0	0.41223	0	0	0	0.232909	0	0.219786	0	0	0	0	0	0.518636	0.517984	0
hsa-mir-6798	0.386867	0	0.286513	0.760351	0	0	0.126884	0.262681	0	0	0	0.367374	0	0	0	0.351701	0.497633	0	1.06313	0	0	0	0	0	0.462865	0.770352	0.885202	0	0	0	0.724074	0	0	0.336305	0.220789	0	0	0	0.433392	0.25937	0.410474	0.341756	0.920387	0	0	0	0.518636	0	0.310287
hsa-mir-6799	0	0	0	0	0	0.237715	0	0	0	0	0	0	0	0	0	0	0	0	0	0	0	0.691319	0	0	0	0.770352	0	0	0	0	0	0	0	0	0	0	0.249311	0	0	0	0	0	0.290608	0	0	0	0	0	0
hsa-mir-6800	0	0.293986	0	0	0	0	0	0.262681	0.655751	0	0	0	0	0	0	0	0	0.856743	0.627355	0	0	0	0	0	0	0	0	0	0	0	0	0	0	0	0	0	0	0	0	0	0	0	0.290608	0	0	0	0	0.282115	0.310287
hsa-mir-6801	0	0.293986	0	0	0	0	0	0	0	0	0	0	0	0	0	0	0	0	0	0	0	0	0	0	0	0	0	0	0	0	0	0	0	0	0	0	0	0	0	0	0	0.341756	0	0	0	0	0	0	0
hsa-mir-6802	0	0.538086	1.06932	0.760351	0	0.237715	0.426694	0.262681	0	0	0	0	0	0	1.20754	0	0.86694	1.39061	0.627355	0	0	0	0	0	0.462865	0.770352	1.42977	0.495159	0	0	0.724074	0	0	0.336305	0.41223	1.13884	0.249311	0	0.766222	0.373436	0.410474	1.04907	1.08119	0.412258	0	0.114074	0.518636	0.282115	0.565507
hsa-mir-6803	0	0.293986	0.525446	1.45141	0	0.237715	0.600484	0	0	0	0	0	0	0	0	0	0.497633	0	0	0	1.38336	0.691319	0	0	0.462865	0	0	0	0	0	0	0	0	0.336305	0	0.486129	0.46182	0	0.609383	0.479139	0.410474	0.341756	0	1.21603	0.263288	0.114074	1.00676	0	0.782292
hsa-mir-6804	0	0	0	0	0	0	0	0	0	0	0	0	0	0	0	0	0	0.856743	0	0	0	0	0	0.578763	0	0	0	0	0	0	0	0	0.59822	0.336305	0	0	0.46182	0	0	0	0	0	0.532378	0	0	0	0	0	0
hsa-mir-6805	0.386867	0	0	0	0.701841	0	0.510245	0	0	0	0	0	0	0	0.726588	0.634248	0	0	0	0.473115	0.851499	0	0.572121	0.578763	0	0	0.885202	0	0.290631	0	0.724074	0	0	0	0.220789	0	0.249311	0	0	0	0	0	0	0	0	0	0.194339	0	0
hsa-mir-6806	1.50858	0.293986	0.286513	0	0.701841	0.620465	0.324485	0.847055	0	0.712084	1.32251	0.367374	1.13385	1.6085	1.56762	0.634248	0.497633	1.39061	1.66854	0.473115	0.851499	1.15673	0.572121	0.990691	0	1.26985	0.885202	1.78946	0.532417	0.871148	1.97573	1.66859	1.01984	1.74961	0.869361	0.678994	0.811106	0.581993	0.907669	0.479139	0.578873	0.849514	1.69223	0.732515	1.00076	0.219784	1.00676	0.720654	0.782292
hsa-mir-6807	0.386867	0	0	0.760351	0.273647	0	0	0.262681	0	0	0	0	0	0	0	0.351701	1.16072	0	0	0	0	0.691319	0	0.578763	0	0	0	0	0	0.500352	0.406994	0	0	0.336305	0.220789	0	0	0	0	0.135506	0.410474	0	0	0	0	0.114074	0.365581	0.517984	0
hsa-mir-6808	0.691626	0	0.909778	0.429697	0	0	0.126884	0.677277	1.10492	0	0	0	1.13385	0	0	0.351701	0	0	1.06313	0	0	0.691319	0	0.990691	0.812745	0	0.885202	0.495159	0	1.16586	0.406994	0	0	0.837988	0.41223	0	0.46182	0	0.232909	0.25937	0.219786	0	0.290608	0.412258	0	0.219784	0	0.282115	0
hsa-mir-6809	0	0	0	0	0	0	0.126884	0.262681	0	0	0	0	0.675559	0	0	0	0	0	0	0	0	0	0	0	0	0	0	0	0	0	0	0	0	0	0	0.486129	0	0	0.232909	0	0	0	0.290608	0	0	0	0	0	0
hsa-mir-6810	0.386867	0	0.286513	0	0.273647	1.05293	0.324485	0.262681	0	0	0	0	0	0	0	0	0	0	0	0	0.851499	0	0	0	0	0	0	0	0	0	0	0	0	0	0	0	0.46182	0.221121	0	0	0	0.341756	0	0.412258	0	0	0.194339	0	0
hsa-mir-6811	0	0	0	0	0	0	0	0	0	0	0	0	0	0	0	0	0	0.856743	1.06313	0	0	0	0	0	0	0	0	0	0	0	0	0	0	0	0	0	0	0	0	0	0	0	0.290608	0	0	0	0	0	0.310287
hsa-mir-6812	0.386867	0.293986	0.286513	0	0	0	0.126884	0	0	0	0	0	0	0	0	0.351701	0	0.856743	0	0	0	0	0	0	0	0	0	0	0	0	0	0	1.34571	0	0	0	0	0	0.232909	0	0	0.341756	0	0	0	0	0	0	0
hsa-mir-6813	0	0	0	0.429697	0.273647	0	0	0.484822	0	0	0	0	0.675559	0	0	0	0	0	0	0	0	0	0	0	0	0	0	0	0	0	0	0	0	0	0	0	0.46182	0	0	0.135506	0	0	0	0	0	0.114074	0	0	0.565507
hsa-mir-6814	0.691626	0	0.286513	0	0	0	0	0	0	0	0	0	0	0	0	0.351701	0	0.856743	0.627355	0	0	0	0	0	0	0	0	0.495159	0	0	0.406994	1.39741	0.59822	0	0	0	0	0	0.232909	0	0	0	0	0	0	0	0	0	0
hsa-mir-6815	0	0	0.909778	0	0	0.779466	0	0.262681	1.10492	0	0.459696	0	1.7608	1.24259	1.20754	0	0	0.856743	0	0.473115	0	0	0	0.578763	0.462865	0	0	0	0.290631	0	0.406994	0	0	0	0	0.678994	0.249311	0	0.766222	0.577625	0.578873	0	0.290608	0.412258	0	0	0.194339	0	0
hsa-mir-6816	0	0	0	0	0	0	0	0	0	0	0	0	0	0	0	0	0	0	0	0	0	0	0	0	0	0	0	0	0	0	0	0	0	0	0	0	0	0	0	0	0	0	0	0	0	0	0	0	0
hsa-mir-6817	0	0	0.286513	0	0	0	0.126884	0	0	0	0	0	0	0	0	0	0	0	0	0	0	0	0	0	0	0	0	0	0	0	0	0	0	0	0.220789	0.263444	0.249311	0	0	0	0	0	0	0	0	0	0	0	0
hsa-mir-6818	0	0	0.525446	1.02917	0	0	0.111221	0	0	0.712084	0	0	0	0.751135	0.726588	0	0	0	0	0	0	0	0	0	0	0	0	0	0	0	0.406994	0	0	0.608844	0	0.263444	0.249311	0	0.232909	0	0.219786	0.341756	0.290608	0	0	0	0	0	0.310287
hsa-mir-6819	0	0	0	0	0	0	0.126884	0	0	0	0	0	0	0	0	0	0	0	0.627355	0	0	0	0	0	0	0	0	0	0	0.500352	0	0	0	0	0	0	0.249311	0	0	0	0	0	0.290608	0	0	0	0	0	0
hsa-mir-6820	0	0.293986	0.286513	0.760351	0	0.237715	0	0.262681	0.655751	0.712084	0	0	0	1.24259	1.20754	0.351701	0	0.856743	1.06313	0	0	0.691319	0	0.990691	0	0.770352	0.885202	1.60757	0.290631	0.500352	0.724074	1.06317	0.59822	1.03568	0.220789	0.263444	0.249311	0.870418	0.766222	0.479139	0	1.04907	0.290608	0.732515	0	0	0.783247	0.720654	0.782292
hsa-mir-6821	0	0	1.21296	0	0.503572	0.237715	0	0.262681	0	0	0	0	0	0.751135	0	0	0	0	0	0	0	0.691319	0	0	0.462865	0	0	0	0	0	0	0	0	0	0	0	0	0	0.232909	0	0	0	0	0	0	0	0	0	0.310287
hsa-mir-6822	0	0	0	0	0	0	0	0.262681	0	0	0	0	0.675559	0	0	0.351701	0	0	0	0	0	0	0	0	0	0	0	0.495159	0	0	0	0	0	0	0	0.263444	0	0	0	0	0	0	0	0	0	0	0	0	0
hsa-mir-6823	0	0	0	0.429697	0	0	0	0	0	0	0	0	0	0	0	0	0	0	0	0	0	0	0	0	0	0	0	0	0	0	0	0	0	0	0	0	0	0	0	0	0	0	0	0	0	0	0	0.282115	0.310287
hsa-mir-6824	0	0	0	0	0	0	0	0.262681	0	0.712084	0	0	0	0	0	0.351701	0	0	0.627355	0	0	0.691319	0	0	0	0	0	0.495159	0	0	0	0	0	0	0	0	0	0	0	0	0	0	0.290608	0.412258	0	0	0	0	0
hsa-mir-6825	0	0	0.286513	0	0	0	0	0	0	0	0	0	0	0	0	0	0	0	0	0	0	0	0	0	0	0.770352	0	0.495159	0	0	0.406994	0	0.59822	0.336305	0.220789	0.263444	0	0.221121	0.433392	0	0	0	0.532378	0.412258	0	0	0	0.282115	0.310287
hsa-mir-6826	0	0	0	0	0	0	0	0	0	0	0	0	0	0	0	0	0	0	0	0	0	0	0	0	0	0	0	0	0.290631	0	0	0	0	0	0.220789	0	0	0	0	0.135506	0	0	0.290608	0	0	0	0	0	0
hsa-mir-6827	0	0	0	0	0	0	0	0	0	0.712084	0	0	0	0	0	0	0	0	0	0	0	0	0	0	0	0	0	0	0	0	0	0.627385	0	0	0	0	0.249311	0	0.232909	0	0	0	0	0	0.263288	0	0	0	0
hsa-mir-6828	0	0	0	0	0	0	0	0	0	0	0	0	0	0	0	0	0	0	0	0	0	0	0	0	0	0	0	0	0	0	0	0	0	0	0	0	0	0	0	0	0	0	0	0	0	0	0	0	0
hsa-mir-6829	0	0	0	0	0	0	0	0	0	0	0	0	0	0	0	0	0	0	0	0	0	0	0	0	0	0	0	0	0	0	0	0	0	0	0	0	0	0	0	0	0	0	0	0	0	0	0	0	0
hsa-mir-6830	0	0	0	0	0	0	0	0	0	0	0	0	0	0	0	0	0	0	0	0	0	0	0	0	0	0	0	0	0	0	0	0	0.59822	0	0	0	0	0	0	0	0	0	0	0	0	0	0	0	0
hsa-mir-6831	0	0	0	0	0	0	0	0	0	0	0	0	0	0	0	0	0	0	0	0	0	0	0	0	0	0	0	0	0	0	0	0	0	0	0	0	0	0	0	0	0	0	0	0	0	0	0	0	0
hsa-mir-6832	0	0	0	0	0	0	0	0	0	0	0	0	0	0.751135	0	0	0	0	0	0	0	0	0	0	0	0	0	0	0.290631	0	1.20394	0	0	0	0.220789	0	0	0.221121	0	0.135506	0	0	0	0	0	0	0.194339	0	0
hsa-mir-6833	0	0.538086	0	0.760351	0	0	0	0	0	0	0	0.367374	0	0	0.726588	0	0	0	0.627355	0	0	0	0	0	0	0	0	0	0	0	0.406994	0	0.59822	0	0	0.263444	0.46182	0	0.232909	0	0.410474	0.341756	0.290608	0.412258	0	0.114074	0.194339	0.282115	0
hsa-mir-6834	0.691626	0	0	0	0	0	0	0	0	0	0	0	0	0	0	0	0	0	0	0	0	0	0	0	0	0	0	0	0	0	0	0	0	0	0.220789	0	0	0.221121	0	0	0.219786	0	0	0	0	0	0	0	0
hsa-mir-6835	0	0	0	0	0	0	0	0	0	0	0	0	0	0	0	0	0	0	0	0	0	1.15673	0	0	0	0	0	0	0	0	0	0	0	0	0	0	0	0	0	0	0	0	0	0	0	0	0	0	0
hsa-mir-6836	0	0	0	0	0	0	0	0	0	0	0	0	0	0	0	0	0	0	0	0	0	0	0	0	0	0	0	0	0	0	0	0	0	0	0	0	0	0	0	0	0	0	0	0	0	0	0.194339	0	0.310287
hsa-mir-6837	0.691626	0.929102	1.67667	1.77764	0.503572	1.48091	0.426694	1.76404	1.95501	1.82891	1.08798	0.367374	1.13385	0.751135	0	0	0.497633	1.39061	1.39736	0.828799	0	0.691319	0	0.578763	0	0.770352	0	0.863107	0.290631	1.16586	1.20394	2.26704	0.59822	1.36464	2.26409	1.00123	1.32718	1.11068	0.609383	1.18917	1.10563	0.849514	1.589	1.99164	0.263288	0.866154	0.89933	0.720654	0.782292
hsa-mir-6838	0	0	0	0	0	0	0	0	0	0	0	0	0	0	0	0	0	0	0	0	0	0	0.572121	0	0.462865	0	0	0.863107	0	0	0	0.627385	0	0	0	0	0.249311	0.221121	0	0	0.219786	0	0.290608	0	0.263288	0	0.194339	0	0
hsa-mir-6839	0	0	0	0	0	0	0	0	0	0	0	0	0	0	0	0.351701	0	0	0	0.473115	0	0	0	0	0	0	0.885202	0	0	0	0.983867	0	0	0	0.220789	0	0	0	0	0	0	0	0.532378	0	0	0.114074	0	0.282115	0
hsa-mir-6840	0	0	0	0	0	0	0	0	0	0	0	0	0	0	0	0.634248	0	0	0	0	0	0	0	0.578763	0	0	0	0	0	0	0	0	0	0	0	0	0.249311	0	0	0	0	0	0	0	0	0	0.194339	0	0
hsa-mir-6841	0	0	0	0	0	0	0	0	0	0	0	0	0	0	0	0	0	0	0	0	0	0	0	0	0	0	0	0	0	0	0	0	0	0	0	0	0	0	0	0	0	0	0	0	0	0	0	0	0
hsa-mir-6842	1.34355	0.746801	3.00541	2.78621	0.273647	2.19613	1.49798	0.677277	0	1.18672	1.32251	0.903046	0	2.1426	1.85554	2.28241	2.4675	3.18736	1.66854	0.828799	1.77109	2.56513	0	2.15542	2.36766	3.13135	2.13359	2.75118	0.920445	1.16586	2.09058	1.89678	2.02966	2.7033	2.86475	1.92781	2.31075	1.73072	2.11398	2.12043	1.65044	2.32466	2.56302	0.994435	1.00076	0.729651	2.06088	1.7552	2.94836
hsa-mir-6843	0	0	0.286513	0.760351	0	0	0	0	0	0.712084	0	0.659931	0	0	0	0.351701	0	0	0	0	0	0	0	0	0	0	0	0	0	0.500352	0	0	0	0	0.220789	0	0.249311	0.221121	0	0.135506	0	0	0	0.732515	0	0.219784	0.194339	0	0
hsa-mir-6844	0	0	0	0	0	0	0	0.262681	0	0	0	0	0	0	0	0	0	0	1.06313	0	0	0.691319	0	0	0	0	0	0	0	0	0.406994	0	0	0	0	0	0	0	1.03648	0	0.219786	0	0	0	0	0	0	0	0
hsa-mir-6845	0	0	0.525446	0	0	0	0	0	0	0	0	0	0	0	0	0	0	0	0	0	0	0	0	0	0	0	0	0	0	0	0	0	0	0	0	0	0	0	0	0	0	0	0	0	0.263288	0	0	0	0
hsa-mir-6846	0	0	0	0	0	0.237715	0	0	0	0	0	0	0	0	0	0	0	0	0	0	0	0.691319	0	0	0	0	0.885202	0	0	0	0	0	0	0.608844	0	0	0	0	0	0	0	0	0	0	0	0	0	0	0
hsa-mir-6847	0	0	0	0	0	0	0	0	0	0	0	0	0	0.751135	0.726588	0	0	0	0	0	0	0.691319	0	0	0	0	0	0	0	0	0	0	0	0	0	0	0	0	0.232909	0	0	0	0	0	0.263288	0	0	0	0
hsa-mir-6848	0	0	0	0	0	0	0	0	0	0	0	0	0	0	0	0	0	0	0	0	0	0	0	0	0	0	0	0	0	0	0	0	0	0.336305	0	0	0	0	0	0	0	0	0	0	0	0	0	0	0
hsa-mir-6849	0.386867	0	0	0	0	0	0	0	0	0	0	0	0	0	0	0	0	0	0	0	0	0	0	0	0.462865	0	0	0	0	0	0	0	0	0.608844	0	0	0	0	0	0.135506	0	0.341756	0	0	0	0	0	0.282115	0
hsa-mir-6850	0	0	0	0.429697	0.273647	0	0	0	0	0	0	0	0	0	0	0	0	0	0	0	0	0	0	0	0	0	0	0	0	0	0	0	0	0	0	0	0	0	0	0	0	0.341756	0.290608	0	0	0	0	0	0
hsa-mir-6851	0	0	0.286513	0	0.273647	0	0	0	0	0	0	0	0	0	0	0	0	0.856743	0	0	0	0	0	0	0.462865	1.26985	0	0	0	0	0	0	0.59822	0.336305	0	0	0	0	0	0	0	0.341756	0	0	0	0	0	0	0
hsa-mir-6852	0	0.293986	1.21296	0.760351	0	0.441747	0.111221	0.262681	0	0	0.807771	0	0	0	0.726588	0.351701	0	0	0	0	0	0	0	0	0	0	0	0	0	0	0.724074	0	0	0.837988	0	0.678994	0.647008	0	0.433392	0.135506	0.219786	0.341756	0	0	0	0	0.194339	0.517984	0.310287
hsa-mir-6853	0	0	0	0	0	0	0	0	0	0	0	0	0	0	0	0	0	0.856743	0.627355	0	0	0	0	0	0	0	0	0	0.290631	0	0	0	0	0	0	0	0.249311	0	0.232909	0	0	0	0.290608	0	0	0	0.194339	0	0
hsa-mir-6854	1.34355	0.293986	0.525446	1.02917	1.72135	1.28273	0.451785	1.13635	1.72323	1.18672	0.459696	0.367374	1.99497	0.751135	1.85554	0.870418	1.7955	1.39061	0	2.16766	0	1.50806	0.572121	0.990691	0.812745	2.17901	0.885202	1.15603	0.532417	1.16586	0.406994	0.627385	0.59822	0.336305	1.21597	0	0	0.221121	0.907669	0.577625	0.219786	0.341756	1.22585	0	0	0.318275	0	0.898329	1.13735
hsa-mir-6855	0	0.293986	0	0.429697	0	0	0.338005	0.847055	0	0	1.08798	0	0	0	0	0.351701	0.497633	0	0	0	0	0	0	0.990691	0	0	0	0	0	0	0	0	0	0.336305	0	0.263444	0.249311	0.412811	0	0	0.219786	0	0.532378	0	0	0	0	0	0
hsa-mir-6856	0	0	0	0	0	0	0	0	0	0	0	0	0	0	0	0	0	0	0	0	0	0	0	0	0	0	0	0	0	0	0	0	0	0	0	0	0	0	0.232909	0	0	0	0	0	0	0	0	0	0
hsa-mir-6857	0	0	0	0	0	0	0.126884	0	0	0	0	0	0	0	0	0	0	0	0	0.473115	0	0	0	0	0	0	0	0	0	0	0	0	0	0	0	0	0	0	0	0	0	0	0	0	0	0	0	0	0
hsa-mir-6858	0	0	0	0.429697	0	0	0.324485	0	0	0	0	0	0	0	0	0	0	0	0	0	0	0	0	0	0	0.770352	0	0	0	0	0	0	0	0.336305	0	0	0	0	0	0	0	0	0.290608	0	0	0	0.194339	0.282115	0.310287
hsa-mir-6859-1	0	0	0	0	0	0	0	0	0	0	0	0	0	0	0	0	0	0	0	0	0	0	0	0	0	0	0	0	0	0	0	0	0	0	0	0	0	0	0	0	0	0	0	0	0	0	0	0	0
hsa-mir-6859-2	0	0	0	0	0	0	0	0	0	0	0	0	0	0	0	0	0	0	0	0	0	0	0	0	0	0	0	0	0	0	0	0	0	0	0	0	0	0	0	0	0	0	0	0	0	0	0	0	0
hsa-mir-6859-3	0	0	0	0	0	0	0	0	0	0	0	0	0	0	0	0	0	0	0	0	0	0	0	0	0	0	0	0	0	0	0	0	0	0	0	0	0	0	0	0	0	0	0	0	0	0	0	0	0
hsa-mir-6859-4	0	0	0	0	0	0	0	0	0	0	0.459696	0	0	0	0	0	0	0	0	0	0	0	0	0	0	0	0	0	0	0	0	0	0	0	0	0	0	0	0	0	0	0	0	0	0	0	0	0	0
hsa-mir-6860	0	0	0	0	0	0	0	0	0	0	0	0	0	0	0	0	0	0	0	0	0	0	0	0	0	0	0	0	0	0	0	0	0	0	0	0	0	0	0	0	0	0	0	0	0	0	0	0	0
hsa-mir-6861	0	0	0	0	0	0	0	0	0	0	0	0	0	0	0	0	0	0	0	0	0	0	0	0	0	0	0	0.495159	0	0	0	0	0	0	0	0	0	0	0	0	0	0	0	0	0	0	0	0	0
hsa-mir-6862-1	0	0	0	0	0	0	0	0	0.655751	0	0	0	0	0	0	0	0	0	0	0	0	0	0	0	0	0	0	0	0	0	0	0	0	0	0	0	0	0	0	0	0	0	0	0	0	0	0	0	0
hsa-mir-6862-2	0	0	0	0	0	0	0	0.262681	0	0	0	0	0	0	0	0	0	0	0	0	0	0	0	0	0	0	0	0	0	0	0	0	0	0	0	0	0	0	0	0	0	0	0	0	0	0	0	0	0
hsa-mir-6863	0	0	0	0	0	0	0	0	0	0	0	0	0	0	0	0	0	0	0	0	0	0	0	0	0	0	0	0	0	0	0	0	0	0	0	0	0	0	0	0	0	0	0	0	0	0	0	0	0
hsa-mir-6864	0	0	0	0	0	0	0	0	0	0	0	0	0	0	0	0	0	0	0	0	0	0	0	0	0	0	0	0	0	0	0	0	0	0	0	0	0	0	0	0	0	0	0	0	0	0	0	0	0
hsa-mir-6865	0	0	0	0	0	0	0	0	0	0	0	0	0	0	0	0	0	0.856743	0	0	0	0	0	0	0	0	0	0	0	0	0	0	0	0	0	0	0	0	0	0	0	0	0	0	0.263288	0	0	0	0
hsa-mir-6866	0	0	0	0	0	0	0	0	0	0	0	0	0	0.751135	0	0	0	0	0	0.473115	0	0	0	0	0	0	0	0	0	0	0	0	0	0	0	0	0	0	0	0	0	0	0	0	0	0	0	0	0
hsa-mir-6867	0	0.293986	0	0	0	0.237715	0.111221	0	0	0	0	0	0	0	0	0	0	0	0	0.473115	0	0	0	0	0.462865	0	0	0	0	0	0	0	0	0	0	0	0	0	0	0	0	0	0	0	0	0.114074	0	0	0
hsa-mir-6868	0.386867	0	0.286513	0	0	0.620465	0.126884	0.262681	0.655751	0	0.459696	0	0.675559	0	0.726588	0	0	1.39061	0	0	0	0	0	0.578763	0	0	0	0	0.290631	0.500352	0	0.627385	0.59822	0.608844	0	0	0.811106	0.581993	0.232909	0.135506	0.219786	0	1.08119	1.40808	0	0.219784	0.518636	0	0
hsa-mir-6869	0	0	0	0	0	0	0	0	0	0	0	0	0	0	0	0	0	0	0	0	0	0	0	0	0	0	0	0	0	0	0	0	0	0	0	0	0	0	0	0.135506	0	0.341756	0.290608	0	0	0	0	0	0.310287
hsa-mir-6870	0.691626	0	0	0	0	0	0.310836	0	0	0	0	0	0	0	0	0	0	0	0	0	0	0	0	0	0	0	0	0	0	0	0.406994	0	0	0.608844	0.220789	0	0	0	0.232909	0.135506	0	0	0.532378	0	0	0	0	0	0
hsa-mir-6871	0	0	0	0.760351	0	0	0	0	0	0	0.459696	0	0	0	0.726588	0	0	0	0.627355	0	0	0	0	0	0	0	0	0	0	0	0	0	0	0.336305	0	0	0.249311	0	0	0.373436	0	0	0.532378	0	0	0	0	0	0
hsa-mir-6872	0	0	0	0	0	0	0	0	0	0	0	0	0	0.751135	0	0.351701	0	0	0	0	0	0	0	0	0	0	0	0	0	0	0.406994	0	0	0	0	0	0	0	0	0	0	0.341756	0	0	0	0	0.194339	0	0
hsa-mir-6873	0.386867	0	0	0	0	0	0	0	0	0	0	0	0	0	0	0	0	0.856743	0.627355	0	0	0	0	0	0	0	0	0	0	0	0	0	0	0	0	0.263444	0.46182	0	0	0	0	0	0	0	0	0	0.194339	0.282115	0
hsa-mir-6874	0.386867	0.293986	0	1.25569	0.701841	0.620465	0.111221	0.484822	0.655751	0	0.459696	0.367374	1.13385	0	0	0	0	0	0.627355	0.473115	0.851499	0	0	0	0	0	0	0	0	0.500352	0	0	0	0.608844	0.220789	0.263444	0.249311	0.995543	0.433392	0.373436	0	0	0.290608	0	0.263288	0.41047	0.194339	0	0.565507
hsa-mir-6875	0.386867	0	0.730372	0	0.273647	0.441747	0	0	0	0.712084	0.807771	0	0	0	0	0.351701	0.497633	0	0	0.473115	0	0.691319	0	0	0.462865	0.770352	0	0.495159	0.739437	0	0	0	0	0	0.220789	0	0.46182	0	0	0	0.578873	0	0	0.412258	0.263288	0.318275	0.194339	0	0
hsa-mir-6876	0	0	0	0	0	0.237715	0	0	0	0.712084	0	0	0	0	0	0	0	0	0	0	0	0	0	0	0	0	0	0	0	0	0.406994	0	0	0	0	0	0	0	0	0	0	0	0	0	0	0	0	0	0
hsa-mir-6877	0.691626	0.293986	0	0	0	0.779466	0.243505	0	0	0	0	0	0	0	0	0.351701	0.497633	1.39061	0.627355	0	0	1.79037	0	0.990691	0	0.770352	0	0.863107	0.290631	0.500352	0.406994	0	0	1.03568	0.220789	0.486129	0	0	0.433392	0.479139	0.410474	0.341756	0.739388	0.412258	0	0	0	0	0.782292
hsa-mir-6878	0	0.293986	0	0	0	0	0	0	0	0	0	0	0	0	0	0	0	0	0	0	0	0	0	0	0	0	0	0.495159	0	0	0	0	0	0	0.220789	0	0	0	0	0.135506	0	0	0	0	0	0.114074	0	0	0
hsa-mir-6879	0	0.293986	0.909778	0.760351	0	0	0	0.262681	0	0	0.459696	0	0	0	0	0	0.497633	0.856743	0	0	0	0.691319	0	0	0.462865	0	0	0	0.290631	0	0.406994	0.627385	0	0.837988	0.220789	0.678994	0.647008	0	0.433392	0	0	0	0	0.732515	0	0	0.518636	0	0.782292
hsa-mir-6880	0	0	0.286513	0	0	0	0	0	0	0	0.459696	0	0	0	0	0	0	0	0	0	0	0	0	0.578763	0	0	0	0	0	0	0	0	0.59822	0.336305	0	0	0	0	0	0	0	0	0	0	0	0	0.194339	0	0
hsa-mir-6881	0	0	0	0	0	0	0	0	0	0	0	0	0	0	0	0	0	0	0	0	0	0	0	0	0	0	0.885202	0	0	0	0	0	0	0	0	0	0	0	0	0	0	0	0	0	0	0	0	0	0
hsa-mir-6882	0	0.293986	0	0.429697	0	0	0	0.262681	0	0	0	0.367374	0	0	0	0	0	0	0.627355	0	0	0	0	0	0	0	0.885202	0	0.290631	0.500352	0	0	0	0	0	0	0.46182	0.221121	0	0	0.219786	0.341756	0.290608	0	0	0.114074	0.194339	0.282115	0
hsa-mir-6883	0	0	0	0	0	0	0.126884	0	0	0	0	0	0	0	0	0	0	0	0	0	0	0	0	0	0	0	0	0	0	0	0	0	0	0	0	0	0	0.412811	0	0	0	0	0	0	0	0	0.365581	0	0
hsa-mir-6884	0.386867	0	0	0	0	0	0	0	0	0	0	0	0	0	0	0	0	0	0	0	0	0	0	0	0	1.26985	0	0	0	0.500352	0.724074	0	0	0	0.581218	0.486129	0.647008	0	0	0	0.410474	0.341756	0.532378	0	0	0	0	0	0.310287
hsa-mir-6885	0.386867	0	0.286513	0	0	0	0	0	0	0	0.459696	0.367374	0	0	0	0.351701	0.497633	0	0	0	0	0	0	0	0	0	0	0.495159	0	0	0.406994	0	0.59822	0.608844	0	0.263444	0.811106	0.221121	0.433392	0	0	0	0	0	0	0.114074	0	0	0
hsa-mir-6886	0	0	0.286513	0	0	0	0	0	0	0	0	0	0	0	0	0	0	0	1.06313	0	0	0	0	0	0	0	0	0	0	0	0	0	0	0	0	0	0	0	0	0.135506	0	0.617859	0.290608	0	0	0	0	0	0.310287
hsa-mir-6887	0	0	0	0	0	0.441747	0	0	0	0	0	0	0	0	0	0.351701	0	0	0.627355	0	0.851499	0	0	0	0	0	0	0	0	0	0	0	0	0.336305	0	0	0	0	0	0	0	0	0.290608	0	0	0	0	0	0
hsa-mir-6888	0.691626	0	0.286513	0.429697	0	0	0	0	0	0	0	0	0	0	0	0	0	0	0	0	0	0	0.572121	0	0.462865	0	0	0	0	0	0	0.627385	0	0.608844	0.220789	0	0.46182	0	0	0	0	0.341756	0	0.412258	0	0	0	0.517984	0.310287
hsa-mir-6889	0	0	0	0	0	0	0	0	0	0	0	0	0	0	0	0	0	0	0	0	0	0	0	0	0	0	0	0	0	0	0	0	0	0	0	0	0	0	0	0	0.219786	0	0	0	0	0	0	0.282115	0
hsa-mir-6890	0.386867	0	0	0	0	0	0	0.262681	0	0	0	0	0	0	0	0	0	0	0	0	0	0	0	0	0	0	0	0	0	0	0	0	0	0	0	0	0	0	0	0	0	0	0	0	0	0	0	0	0
hsa-mir-6891	0.691626	0.293986	1.06932	0.760351	0.273647	0.237715	0.413983	0.484822	0.655751	1.18672	0	0	0	0	1.20754	0.351701	0.497633	0.856743	0	0	0	0	0	0	0.462865	1.26985	0	0	0.290631	0	0.724074	0	0	0.336305	0.220789	0	0	0	0.907669	0	0	0	0.532378	0.732515	0	0	0	0.282115	0.970717
hsa-mir-6892	1.50858	0.929102	2.92423	1.62373	1.29984	0.922669	2.4231	2.06877	1.10492	1.82891	2.80819	1.45419	1.13385	1.90013	2.09545	1.6819	3.44433	2.90449	1.06313	1.89403	1.38336	0.691319	0	2.44417	2.46971	2.17901	2.38822	1.78946	3.27855	2.57887	0.983867	2.09375	0	2.22505	2.31293	1.5866	1.21442	2.26594	1.46049	1.36493	2.64753	0.617859	2.32677	0.994435	1.00076	2.01591	2.01014	2.22392	2.70464
hsa-mir-6893	0	0	0	0	0	0	0	0	0	0	0	0	0	0	0	0	0	0	0	0	0	0	0	0	0	0	0	0	0	0	0	0	0	0	0	0	0	0	0	0	0	0	0	0	0	0	0	0	0
hsa-mir-6894	0.386867	0.538086	0.909778	0	0	0	0	0	0	0	0	0.659931	0	0	0	0.351701	0	0	0	0	0	1.15673	0	0	0	0	0.885202	0	0	0	0	0	0	0	0	0.263444	0.647008	0	0.609383	0.135506	0.219786	0.341756	0	0.412258	0	0.114074	0	0.282115	0
hsa-mir-6895	0	0	0.286513	0	0	0	0	0	0	0	0	0	0	0	0.726588	0	0	0	0	0	0	0.691319	0	0	0	0	0	0	0	0	0	0.627385	0.59822	1.03568	0	0	0	0	0	0	0	0	0	0	0	0	0	0	0.782292
hsa-mir-708	6.23112	7.36318	7.65832	6.91111	6.92743	6.70782	6.63872	7.54324	6.7476	7.38855	5.96674	5.6608	5.95224	7.8992	6.13751	5.93503	6.25506	6.35921	5.53021	6.17038	4.90485	5.71808	2.66762	6.43275	6.67776	5.97958	7.47596	5.84568	6.6387	5.91365	5.89093	5.49588	5.0382	6.39156	6.61334	4.35283	6.89817	4.68258	6.57378	6.79441	6.11463	4.46705	7.77934	4.42677	5.88414	6.95238	5.02591	7.28206	7.55768
hsa-mir-7-1	6.64874	5.01869	6.05457	7.42083	4.95772	4.94179	4.34897	4.95214	5.34714	5.0681	4.72885	4.37297	5.89547	5.24368	6.93991	3.74662	4.89882	5.74716	5.2287	4.69146	7.25004	7.92973	6.017	6.37386	6.60674	7.00026	7.25377	6.43597	5.67848	5.09443	5.41676	5.42447	6.49018	6.71726	6.23047	6.1962	6.26365	5.16125	7.54469	5.33597	5.61623	6.31444	7.08756	6.23058	2.67936	4.52676	5.55015	6.45652	6.94411
hsa-mir-7106	0	0	0	0	0	0	0	0	0	0	0	0	0	0	0	0	0	0	0	0	0	0	0	0	0	0	0	0	0	0	0	0	0	0	0	0	0	0	0	0	0	0	0	0	0	0	0.194339	0	0
hsa-mir-7107	0	0	0	0	0	0	0	0	0	0	0	0	0	0	0	0	0	0	0	0	0	0	0	0	0	0	0	0	0	0	0	0	0	0	0	0	0	0	0	0	0	0	0	0	0	0	0	0	0
hsa-mir-7108	0	0	0	0	0	0	0	0.262681	0	0	0	0	0	0	0	0	0	0	0	0	0	0	0	0	0	0	0	0	0	0	0	0	0	0	0	0	0	0	0	0	0	0	0	0	0	0	0	0	0
hsa-mir-7109	0	0	0	0	0	0.237715	0	0.262681	0	0	0	0	0	0	0	0	0	0	0	0	0	0	0	0	0	0	0	0	0	0	0	0	0	0.336305	0.220789	0	0	0	0	0	0	0	0	0	0	0	0	0	0
hsa-mir-711	0	0	0	0	0	0	0	0	0	0	0	0	0	0	0	0	0	0	0	0	0	0	0	0	0	0	0	0	0	0	0	0	0	0	0	0	0	0	0	0	0	0	0	0	0	0	0	0	0
hsa-mir-7110	0	0	0.525446	0.760351	0.273647	0	0	0.484822	0	0.712084	0	0	0	0	0	0	0	0.856743	0	0	0	0	0.572121	0.578763	0	0.770352	0	0	0	0.500352	0.406994	0.627385	0	0	0	0.263444	0	0	0.232909	0.135506	0.219786	0.617859	0.532378	1.21603	0	0.114074	0	0.282115	0.782292
hsa-mir-7111	0	0	0	0	0.273647	0	0.126884	0	0	0	0	0	0	0	0	0	0	0	0	0	0	0	0	0	0	0	0	0	0	0	0	0	0	0	0	0	0	0	0	0	0	0	0.532378	0	0	0	0	0	0
hsa-mir-7112	0	0.293986	0.909778	0.760351	0	0.237715	0	0.484822	0.655751	0	0	0	0	0	0.726588	0	0	0.856743	0	0.473115	0	0.691319	0	0.578763	0	0.770352	0.885202	0	0.290631	0.500352	0.406994	0	0	1.03568	0.41223	0	0.249311	0	0.433392	0	0	0	0	0	0	0	0	0.282115	0.310287
hsa-mir-7113	0	0	0.286513	0	0.273647	0	0	0.262681	0	0	0	0	0	0	0	0	0	0.856743	0	0	0	0.691319	0	0	0	0	0	0.495159	0	0.500352	0	0	0	0.336305	0	0.263444	0.46182	0	0	0	0	0	0	0	0	0	0.194339	0	0.310287
hsa-mir-7114	0	0	0.525446	0	0	0	0	0.262681	0	0	0.459696	0	0.675559	0	0	0	0	0.856743	0.627355	0	0	0.691319	0	0	0	0	0	0	0	0	0.406994	0	0	0	0	0	0	0	0	0	0	0	0	0	0	0	0	0	0.310287
hsa-mir-7150	0	0	0	0	0	0	0	0	0	0	0	0	0	0	0	0	0	0	0	0	0	0	0	0	0	0	0	0	0	0	0	0	0	0	0	0	0	0	0	0	0	0	0	0	0	0	0	0	0
hsa-mir-7151	0.386867	0.293986	0	0	0.273647	0	0	0	0	0	0	0	0	0	0	0.351701	0.497633	0	0.627355	0.473115	0	0.691319	0	0	0	0	0	0	0	0	0	0	0.59822	0	0.220789	0	0	0	0	0.135506	0	0	0	0	0	0.114074	0.194339	0.282115	0
hsa-mir-7152	0	0.293986	0	0	0	0	0	0	0	0	0	0	0	0	0	0	0	0	0	0	0	0	0	0	0	0	0.885202	0	0	0	0	0	0	0	0.220789	0	0	0	0.232909	0	0	0	0	0	0	0	0	0.282115	0
hsa-mir-7153	0	0	0	0	0	0	0	0	0	0	0	0	0	0	0	0	0	0	0	0	0	0	0	0	0	0	0	0	0	0	0	0	0	0	0	0	0	0	0	0	0	0	0	0	0	0	0	0	0
hsa-mir-7154	0	0	0	0	0	0	0	0	0	0	0	0	0	0	0	0	0	0	0	0	0	0	0	0	0	0	0	0	0	0	0	0	0	0	0	0	0	0	0	0	0	0	0	0	0	0	0	0	0
hsa-mir-7155	0.386867	0	0	0.429697	0	0	0.214479	0.262681	0	0	0	0	0	0	0	0	0	0.856743	0	0	0.851499	0	0	0	0	0	0	0.495159	0	0	0.724074	0.627385	0	0	0	0.486129	0	0.412811	0	0	0	0.341756	0	0	0	0	0.365581	0.282115	0
hsa-mir-7156	0	0.293986	0.730372	0.429697	1.03161	0.441747	0.913765	1.48406	1.10492	0	0.459696	0.903046	1.13385	0.751135	0	0	0	0	0.627355	1.11391	0	0.691319	0	0.578763	0.812745	0	0	0	0.290631	0.871148	0.724074	0.627385	0	0.608844	0.220789	0.263444	0.249311	0.581993	0.433392	0.838204	0.219786	0.617859	0.739388	0	0.678643	0.866154	0.783247	0.517984	1.28672
hsa-mir-7157	0	0	0	0	0	0	0	0	0	0	0	0	0	0	0	0	0	0	0	0	0	0	0	0	0	0	0	0	0	0	0	0	0	0	0	0	0	0	0	0	0	0	0	0	0	0	0	0	0
hsa-mir-7158	0	0	0	0	0	0	0	0	0	0	0	0	0	0	0	0	0	0	0	0	0	0	0	0	0	0	1.42977	0	0	0	0	0	0	0	0	0	0	0	0.232909	0	0	0	0	0.412258	0	0	0	0	0
hsa-mir-7159	0	0	0	0	0	0	0	0	0	0	0	0	0	0	0	0	0	0	0	0	0	0	0	0	0	0	0	0	0	0	0	0	0	0	0	0	0	0	0	0	0	0	0	0	0	0	0	0	0
hsa-mir-7160	0	0	0	0	0	0	0	0	0	0	0	0	0	0	0	0	0	0	0	0	0	0	0	0	0	0	0	0	0	0	0	0	0	0	0	0	0	0	0	0.135506	0	0	0	0	0	0	0.194339	0	0
hsa-mir-7161	0	0.538086	0	0.429697	0	0	0	0	0	0	0	0	0	0	0.726588	0	0	0	0	0	0	0	0.572121	0	0	0	0	0	0	0	0	0	0	0	0	0	0	0	0	0	0	0.341756	0.290608	0	0	0	0	0	0
hsa-mir-7162	0	0	0	0	0	0	0	0	0	0	0	0	0	0	0	0	0	0	0	0	0	0	0	0	0	0	0	0	0	0	0	0	0	0	0	0	0	0	0	0	0	0	0	0	0	0	0	0	0
hsa-mir-718	0	0	0	0.429697	0	0	0	0	0	0	0	0	0	0	0	0	0	0	0	0	0	0	0	0	0	0	0	0	0	0	0	0	0	0.336305	0	0	0	0	0.232909	0	0	0	0	0	0	0	0	0	0
hsa-mir-7-2	4.28193	2.63192	1.67667	1.45141	2.31276	2.30472	1.80289	1.37721	0.655751	1.54325	0.807771	1.29279	0	0.751135	2.91594	0.351701	1.16072	2.73912	1.66854	0	2.07639	3.26403	4.28502	2.98367	3.22065	3.13135	2.38822	1.78946	0.532417	0	1.71433	0	2.49176	2.30386	2.83162	2.1394	1.78756	0.581993	3.33779	1.41907	0.729655	0.617859	2.56302	1.72917	1.00076	0.656229	1.52336	2.81708	2.12411
hsa-mir-7-3	3.69983	2.68359	0.730372	2.16012	1.89343	2.45367	1.71964	0.484822	0	1.54325	0.459696	0.659931	0.675559	0.751135	1.85554	0.634248	0.86694	2.5523	1.39736	0	0	3.35352	4.7954	2.98367	3.43765	2.73237	1.42977	2.22814	0.290631	0.871148	1.71433	0	2.49176	1.85806	2.45022	2.1394	1.6206	0.733401	3.15123	0.756464	0.866159	1.22434	1.87887	1.40808	0.678643	0.497126	1.10675	2.46872	2.12411
hsa-mir-744	5.53013	4.1841	6.13795	5.62136	3.82356	3.86922	3.20136	3.88555	5.26316	5.7195	4.03433	2.93924	5.45941	5.21743	4.89761	3.88784	4.25727	6.04167	4.47538	3.56887	5.01661	5.76776	3.05322	5.19128	5.65976	6.30982	6.13865	5.40453	3.77831	4.49551	7.07283	4.61027	5.68249	6.89325	4.98156	4.89962	4.66303	3.94585	6.82629	4.18072	4.24315	4.30092	4.88577	4.70809	3.58636	3.19309	4.56312	5.05226	5.95299
hsa-mir-7515	0	0	0	0	0	0	0	0	0	0	0	0	0	0	0	0	0	0	0	0	0	0	0	0	0	0	0	0	0	0	0	0	0	0	0	0	0	0	0	0	0	0	0	0	0	0	0	0	0
hsa-mir-758	4.55159	4.60172	5.67494	4.05422	4.66883	3.59761	2.44386	4.68726	4.36211	3.31243	5.11988	3.62177	3.75932	5.10738	3.34569	3.41444	4.3476	3.71854	3.43365	5.01954	2.07639	3.66453	3.05322	3.88946	4.10985	3.8488	5.54656	3.85924	3.13932	3.21586	3.9696	4.20417	2.8412	3.76563	6.02966	4.7679	3.24622	4.03601	4.21103	4.61104	4.79823	3.58005	5.3944	3.83093	5.0371	4.43095	4.42468	3.80308	5.00872
hsa-mir-759	0	0	0	0	0	0	0	0	0	0	0	0	0	0	0	0	0	0	0	0	0	0	0	0	0	0	0	0	0	0	0	0	0	0	0	0	0	0	0	0	0	0	0	0	0	0	0	0	0
hsa-mir-760	2.02698	0.538086	1.34359	1.77764	1.03161	0.441747	0.589221	0.998941	1.10492	0.712084	0	0	0	0	1.20754	0	1.16072	1.39061	1.06313	0.473115	0.851499	2.22914	0	1.57254	0.462865	1.64018	1.82418	1.15603	0.290631	1.61955	1.20394	1.39741	0	2.05319	0.869361	0.263444	1.21442	0.221121	1.46049	0.669814	0.866159	0.617859	0.290608	0	0	0.497126	0.518636	0.898329	1.65973
hsa-mir-761	0	0	0	0	0	0	0	0	0	0	0	0	0	0	0	0	0	0	0	0	0	0	0	0	0	0	0	0	0	0	0	0	0	0	0	0	0	0	0	0	0	0	0	0	0	0	0	0	0
hsa-mir-762	0	0	0	0	0	0	0	0	0	0	0	0	0	0	0	0	0	0	0	0	0	0	0	0	0	0	0	0	0	0	0	0	0	0	0	0	0	0	0	0	0	0	0	0	0	0	0	0	0
hsa-mir-764	0	0	0	0	0	0	0	0	0	0	0	0	0	0	0	0	0	0	0	0	0	0	0	0	0	0	0	0	0	0	0	0	0	0	0	0	0	0	0	0	0	0	0	0	0	0	0	0	0
hsa-mir-7641-1	0.386867	0.293986	2.4313	3.99267	0	0.237715	0.338005	0.262681	0	0.712084	0	0.367374	0	1.24259	0	0.351701	0.86694	0	0	0.473115	0	0	0	0	0.462865	2.17901	0	1.15603	0	0	0.724074	1.06317	0	0.336305	0	0	0	0	0	0	0	0	0	0	0	0	0.194339	1.0565	1.13735
hsa-mir-7641-2	0	0	0.909778	2.26797	0.273647	0	0	0	0	0	0	0	0	0.751135	0	0	0	0.856743	0	0.473115	0	0.691319	0	0	0	1.26985	0.885202	0	0.739437	0.500352	0	0	0	0.336305	0.220789	0	0	0	0.232909	0	0	0	0	0	0	0	0	0.282115	0
hsa-mir-765	0.386867	0	0	0.429697	0	0.441747	0.126884	0	0.655751	0	0	0	0	0	0.726588	0	0.497633	0	1.06313	0.473115	0	0	0	0	0	0.770352	0.885202	0	0	0.500352	0.406994	0	0	0.837988	0.220789	0.263444	0	0	0.766222	0.373436	0.578873	0	0	0	0	0	0.365581	0.720654	0.970717
hsa-mir-766	2.63886	3.08044	4.36123	4.82828	1.89343	2.30472	2.74765	1.84647	3.08418	4.08357	2.64467	1.29279	3.31589	3.20122	3.88256	2.70515	3.54958	3.71854	2.80571	1.73492	2.32823	2.70771	1.29873	3.93673	3.793	2.87797	3.86318	2.99297	1.22592	3.33918	3.03038	3.92256	3.42802	4.51027	3.42719	3.38073	3.74955	3.05104	3.99025	2.74668	3.66492	3.64314	4.09316	3.72665	1.48641	2.98395	3.56255	4.04879	4.49798
hsa-mir-767	0.943099	0.746801	0.286513	1.25569	0.273647	2.01618	0.229065	5.88544	0	1.18672	0.459696	0.367374	0	0.751135	0.726588	0.351701	0	0	0	0	0.851499	0	2.29091	5.58162	2.46971	0	0.885202	5.24233	0.290631	1.16586	1.71433	0	0	0	0.220789	0	0	0.221121	0.433392	5.31827	0.219786	0.849514	2.38956	0	0	0	0.194339	4.15754	0.310287
hsa-mir-769	5.39958	4.1841	4.42163	5.17161	4.35219	3.85143	3.60283	3.16804	5.19681	4.13688	3.6156	3.3205	3.99371	4.00257	5.7903	3.59007	3.38868	4.75223	4.32665	3.86628	4.65141	4.87179	2.87326	4.62593	4.58945	6.07327	5.32059	3.73165	3.89111	4.29684	5.96053	3.1088	5.75292	5.06834	4.72613	3.80964	4.04163	3.96127	5.60452	3.64638	3.95246	3.70359	5.1891	3.6527	3.84941	3.31737	3.77501	4.88308	4.92002
hsa-mir-770	0	0	0.286513	0	0	0.237715	0	0.262681	0.655751	0	0	0	0	0	0	0	0	0	0	0	0	0	0	0	0.462865	0	0.885202	0	0	0.500352	0	0	0	0	0.220789	0.486129	0	0	0	0	0.578873	0	0	0.412258	0	0.114074	0.194339	0.282115	0
hsa-mir-7702	0	0.538086	2.69871	4.8458	0.273647	0.237715	1.96934	0.484822	1.44695	0	2.00073	1.11104	1.7608	0.751135	4.76494	1.07331	2.57113	2.33763	1.06313	0	0	1.15673	0.572121	4.02685	1.70914	3.01022	2.79268	0.495159	2.0442	3.00854	1.97573	1.66859	0.59822	3.58806	1.72909	0.84909	1.78756	0.733401	2.96955	0.91556	0.578873	0.849514	1.589	0.412258	0	0.497126	1.10675	2.08394	2.27479
hsa-mir-7703	0	0	0	0	0	0	0	0	0	0	0.459696	0	0	0	0.726588	0	0	0	0	0	0	0	0	0.578763	0	0	0	0	0	0	0	0	0	0	0	0	0	0	0.232909	0	0	0	0	0	0	0	0	0.720654	0
hsa-mir-7704	0	0	0	0	0	0	0	0	0	0	0	0	0	0	0	0	0	0	0	0	0	0	0	0	0	0	0	0	0	0	0	0	0	0	0	0	0	0	0	0	0	0	0	0	0	0	0	0	0
hsa-mir-7705	2.02698	1.09093	0.909778	1.25569	1.97234	0.779466	1.04811	1.48406	0	1.18672	0.459696	0.659931	1.48111	0	0.726588	0.351701	0	0.856743	0	1.35186	2.32823	2.22914	0	0.990691	1.86708	1.26985	0	0.495159	1.78865	0.871148	0.983867	0	1.01984	1.50469	1.21597	0.263444	0.46182	0.581993	1.15472	0.756464	0.410474	0	0.920387	0.412258	0.263288	0.114074	0.518636	0.517984	0.970717
hsa-mir-7706	1.34355	1.36858	1.77255	2.16012	0.701841	0.779466	0.338005	1.99841	2.33	1.54325	1.08798	0.367374	0	1.90013	2.48105	1.25116	1.40467	2.33763	1.39736	1.11391	0	1.15673	0.980694	2.15542	0.812745	2.57041	0.885202	1.78946	1.69231	1.61955	0	1.66859	2.35354	1.85806	1.10942	1.00123	1.21442	0.412811	1.92723	0.988978	0.578873	0.849514	1.69223	0	0.848674	0.497126	0.89933	0.898329	0.970717
hsa-mir-7843	0	0	0	0	0	0	0	0	0	0	0	0	0	0	0	0	0	0	0	0	0	0	0	0	0	0	0	0	0	0	0	0	0	0	0	0	0	0	0	0	0	0	0	0	0	0	0	0	0
hsa-mir-7844	0.691626	0.293986	0.286513	0	0.273647	0	0.243505	0	0.655751	0	0	0	0	0.751135	0	0.351701	0.86694	0	0	0	0	0	0	0.578763	0.812745	1.64018	0	0	1.08125	0.500352	0	0	0.59822	0.336305	0.41223	0.263444	0	0	0.433392	0.373436	0	0	0	0.412258	0	0.114074	0	0	1.13735
hsa-mir-7845	0	0.293986	0.286513	0	0	0	0	0.262681	0	0	0	0	0	0.751135	0	0	0.497633	0	0	0	0	0.691319	0	0	0	0	0	0	0	0	0	0	0	0.336305	0.869361	0	0.46182	0	0	0.135506	0	0	0	0	0	0.219784	0	0.282115	0
hsa-mir-7846	0	0.293986	0	0.429697	0	0	0	0	0	0	0	0	0	0	0.726588	0	0	0.856743	0	0	0.851499	0	0	0	0	0	0	0	0	0	0	0.627385	0	0	0	0.263444	1.6206	0	1.46049	0	0	0.341756	0.532378	0.732515	0.848674	0.219784	0.365581	0.517984	0
hsa-mir-7847	0	0	0	0	0	0	0	0	0	0	0	0	0	0	0	0	0	0	0	0	0	0	0	0	0	0	0	0	0	0	0	0	0	0	0	0	0	0	0	0	0	0	0	0	0	0	0.194339	0	0
hsa-mir-7848	0	0	0	0	0	0	0	0	0	0	0	0	0	0	0	0	0	0	0	0	0	0	0	0	0	0	0	0	0.290631	0	0	0	0	0	0	0.263444	0	0	0	0	0	0	0	0	0	0	0	0	0
hsa-mir-7849	0	0	0	0	0	0.237715	0	0	0	0	0	0	0	0	0	0	0	0	0	0	0	0	0	0	0	0	0	0	0	0	0	0	0	0.608844	0	0	0	0	0	0	0	0	0	0.412258	0	0	0.194339	0	0
hsa-mir-7850	0	0	0.525446	0	0.273647	0	0.243505	0.677277	0	0	0	0	0	0	0	0	0	0	0	0	0	0.691319	0	0.578763	0.462865	0	0	0	0	0	0	0	0	0	0.220789	0.678994	0.249311	0	0.232909	0.25937	0	0	0	0.412258	0	0	0.194339	0.720654	0
hsa-mir-7851	0	0	0	0	0	0	0	0	0	0	0	0	0	0	0	0	0	0	0	0	0	0	0	0	0	0	0	0	0.290631	0	0	0	0	0	0	0	0	0	0	0	0	0	0	0	0	0	0	0	0
hsa-mir-7852	0	0	0	0	0	0	0	0	0	0	0	0	0	0	0	0	0	0	0	0	0	0.691319	0	0	0	0	0	0	0	0	0	0	0	0	0	0	0	0	0	0	0	0	0	0	0	0	0	0	0
hsa-mir-7853	0	0	0	0	0	0	0	0	0	0	0	0	0	0	0	0	0	0	0	0	0	0	0	0	0	0	0	0	0	0	0	0	0	0	0	0	0	0	0.433392	0	0	0	0	0	0	0	0	0	0
hsa-mir-7854	0.386867	0	1.06932	1.25569	0.503572	0.441747	0.3514	0.998941	0.655751	0	0	0	0	0.751135	0.726588	0	0	1.39061	0	0	0	0.691319	0	0.990691	0.462865	1.64018	0.885202	0	0	0	0.724074	0.627385	0	1.20951	0.220789	0.84909	0.811106	0.221121	0.766222	0.373436	0.410474	0.849514	0.532378	0	0	0	0.518636	0.720654	1.13735
hsa-mir-7855	0	0	0	0	0	0	0	0	0	0	0	0	0	0	0	0	0	0	0	0	0	0	0	0	0	0	0	0	0	0	0	0	0	0	0	0	0	0	0	0	0	0	0	0	0	0	0	0	0
hsa-mir-7856	0	0	0	0	0	0	0	0	0	0	0	0	0	0	0	0	0	0	0	0	0	0	0	0	0	0	0	0	0	0	0	0	0	0	0	0	0	0	0	0	0	0	0	0	0	0	0	0	0
hsa-mir-7973-1	0	0	0	0	0	0	0	0	0	0	0	0.367374	0	0	0	0	0	0	0	0	0	0	0	0	0	0	0	0	0	0	0	0	0	0	0	0	0	0	0	0	0	0	0	0	0	0	0	0	0
hsa-mir-7973-2	0	0	0	0	0	0	0	0	0	0	0	0	0	0	0	0	0	0	0	0	0	0	0	0	0	0	0	0	0	0	0	0	0	0	0	0	0	0	0	0	0	0	0	0	0	0	0	0	0
hsa-mir-7974	0.691626	0.746801	0	2.26797	1.03161	0.922669	0.229065	0.262681	0.655751	0	0	0	0.675559	0.751135	1.85554	0	0.497633	0	0	0	0.851499	0.691319	0	0.578763	0	1.26985	0	0	0.290631	0.871148	1.20394	0	0.59822	0	0.732472	0	0	0	1.03648	0.577625	0	0	0.532378	0	0	0	0	0.898329	0
hsa-mir-7975	0	0	0	0	0	0	0	0	0	0	0	0	0	0	0	0	0	0	0	0	0	0	0	0	0	0	0	0	0	0	0	0	0	0	0	0	0	0	0	0	0	0	0	0	0	0	0	0	0
hsa-mir-7976	0.386867	0.538086	0.286513	0.429697	0.273647	0.779466	0	0	0	0	0	0	0	0	0	0	0	0	0	0	0	0	0	0	0	0	0	0	0.290631	0	0	0	0	0	0.220789	0.84909	0.647008	0	0.232909	0.135506	0	0	0	0.412258	0	0	0.657	0	0.310287
hsa-mir-7977	0	0	0	0.429697	0	0	0	0	0	0	0	0	0	0	0.726588	0	0	0	0	0	0	0	0	0	0	0	0	0	0	0	0	0	0	0	0	0	0	0	0	0	0	0	0	0	0	0	0.194339	0	0
hsa-mir-7978	0	0	0.525446	0	0	0	0	0	0	0	0	0	0	0	0	0	0	0	0	0	0	0	0	0	0	0	0	0	0	0	0	0	0	0	0	0	0	0	0	0	0	0	0	0	0	0	0	0	0
hsa-mir-802	4.57039	0	0	1.45141	4.02208	0	0	1.13635	2.33	0.712084	2.55539	0	6.07234	0	0	1.07331	0	0	0	0	0.851499	0.691319	1.55916	0	0	0	1.42977	5.63598	0	0	0	0	0.59822	0	2.7274	3.61106	0	0.221121	2.27931	0	0.578873	6.28507	0.290608	1.21603	0.263288	0.497126	4.08799	0.517984	0.310287
hsa-mir-8052	0	0	0	0	0	0	0	0	0	0	0	0	0	0	0	0	0	0	0	0	0	0	0	0	0	0	0	0	0	0	0	0	0	0	0	0	0	0	0	0	0	0	0	0	0	0	0	0	0
hsa-mir-8053	0	0	0	0	0	0	0	0	0	0	0	0	0	0	0	0	0	0	0	0	0	0	0	0	0	0	0	0	0	0	0	0	0	0	0	0	0	0	0	0	0	0	0	0	0	0	0	0	0
hsa-mir-8054	0	0	0	0	0	0	0	0	0	0	0	0	0	0	0	0	0	0	0	0	0	0	0	0	0	0	0	0	0	0	0	0	0	0	0	0	0	0	0	0	0	0	0	0	0	0	0	0	0
hsa-mir-8055	0	0	0	0	0	0	0	0	0	0	0	0	0	0	0	0	0	0	0	0	0	0	0	0	0	0	0	0	0	0	0	0	0	0	0	0	0	0	0	0	0	0	0	0	0	0	0	0	0
hsa-mir-8056	0	0	0	0	0	0	0	0	0	0	0	0	0	0	0	0	0	0	0	0	0	0	0	0	0	0	0	0	0	0	0	0	0	0	0	0	0	0	0	0	0	0	0	0	0	0	0	0	0
hsa-mir-8057	0	0	0	0	0	0	0	0	0	0	0	0	0	0	0	0	0	0	0	0	0	0	0	0	0	0	0	0	0	0	0	0	0	0	0	0	0	0	0	0	0	0	0	0	0	0	0	0	0
hsa-mir-8058	0	0	0	0	0	0	0	0	0	0	0	0	0	0	0	0	0	0	0	0	0	0	0	0	0	0	0	0	0	0	0	0	0	0	0	0	0	0	0	0	0	0	0	0	0	0	0	0	0
hsa-mir-8059	0	0	0	0.429697	0	0	0	0	0	0	0	0	0	0	0	0	0	0	0	0	0	0	0	0	0	0	0	0	0	0	0.724074	0	0	0	0	0.263444	0	0	0.609383	0	0	0	0	0	0	0	0	0	0
hsa-mir-8060	0	0	0	0	0	0	0	0	0	0	0	0	0	0	0	0	0	0	0	0	0	0	0	0	0	0	0	0	0	0	0	0	0	0	0	0	0	0	0	0	0	0	0	0	0	0	0	0	0
hsa-mir-8061	0	0	0	0	0	0	0	0	0	0	0	0	0	0	0	0	0	0	0	0	0	0	0	0	0	0	0	0	0	0	0	0	0	0	0	0	0	0	0	0	0	0	0	0	0	0	0	0	0
hsa-mir-8062	0	0	0	0	0	0	0	0	0	0	0	0	0	0	0	0	0	0	0	0	0	0	0	0	0	0	0	0	0	0	0	0	0	0	0	0	0	0	0	0	0	0	0	0	0	0	0	0	0
hsa-mir-8063	0	0	0	0	0	0	0	0	0	0	0	0	0	0	0	0	0	0	0	0	0	0	0	0	0	0	0	0	0	0	0	0	0	0	0	0	0	0	0	0	0	0	0	0	0	0	0	0	0
hsa-mir-8064	0	0	0	0	0	0	0	0	0	0	0	0	0	0	0	0	0	0	0	0	0	0	0	0	0	0	0	0	0	0	0	0	0	0	0	0	0	0	0	0	0	0	0	0	0	0	0	0	0
hsa-mir-8065	0	0	0	0	0	0	0	0	0	0	0	0	0	0	0	0	0	0	0	0	0	0	0	0	0	0	0	0	0	0	0	0	0	0	0	0	0	0	0	0	0	0	0	0	0	0	0	0	0
hsa-mir-8066	0	0	0	0	0	0	0	0	0	0	0	0	0	0	0	0	0	0	0	0	0	0	0	0	0	0	0	0	0	0	0	0	0	0	0	0	0	0	0	0	0	0	0	0	0	0	0	0	0
hsa-mir-8067	0	0	0	0	0	0	0	0	0	0	0	0	0	0	0	0	0	0	0	0	0	0	0	0	0	0	0	0	0	0	0	0	0	0	0	0	0	0	0	0	0	0	0	0	0	0	0	0	0
hsa-mir-8068	0	0	0	0	0	0	0	0	0	0	0	0	0	0	0	0	0	0	0	0	0	0	0	0	0	0	0	0	0	0	0	0	0	0	0	0	0	0	0	0	0	0	0	0	0	0	0	0	0
hsa-mir-8069-1	0	0	0	0	0	0	0	0	0	0	0	0	0	0	0	0	0	0	0	0	0	0	0	0	0	0	0	0	0	0	0	0	0	0	0	0	0	0	0	0	0	0	0	0	0	0	0	0	0
hsa-mir-8069-2	0	0	0	0	0	0	0	0	0	0	0	0	0	0	0	0	0	0	0	0	0	0	0	0	0	0	0	0	0	0	0	0	0	0	0	0	0	0	0	0	0	0	0	0	0	0	0	0	0
hsa-mir-8070	0	0	0	0	0	0	0	0	0	0	0	0	0	0	0	0	0	0	0	0	0	0	0	0	0	0	0	0	0	0	0	0	0	0	0	0	0	0	0	0	0	0	0	0	0	0	0	0	0
hsa-mir-8071-1	0	0	0	0	0	0	0	0	0	0	0	0	0	0	0	0	0	0	0	0	0	0	0	0	0	0	0	0	0	0	0	0	0	0	0	0	0	0	0	0	0	0	0	0	0	0	0	0	0
hsa-mir-8071-2	0	0	0	0	0	0	0	0	0	0	0	0	0	0	0	0	0	0	0	0	0	0	0	0	0	0	0	0	0	0	0	0	0	0	0	0	0	0	0	0	0	0	0	0	0	0	0	0	0
hsa-mir-8072	0.386867	0	0.286513	0.760351	0	0	0.111221	0	0.655751	0	0	0	0	0	0.726588	0.634248	0	0	1.06313	0	0.851499	0.691319	0.980694	0	0	0.770352	0.885202	0	0	0.500352	0.406994	0	1.01984	0.336305	0.220789	0.84909	0	0.221121	0	0.479139	0	0.617859	0.920387	0	0	0	0.194339	0.282115	0.310287
hsa-mir-8073	0	0	0	0	0	0	0	0	0	0	0	0	0	0	0	0	0	0	0	0	0	0	0	0	0	0	0	0	0	0	0	0	0	0	0	0	0	0	0	0	0	0	0	0	0	0	0	0	0
hsa-mir-8074	0	0	0	0	0	0	0	0	0	0	0	0	0	0	0	0	0	0	0	0	0	0	0	0	0	0	0	0	0	0	0	0	0	0	0	0	0	0	0	0	0	0	0	0	0	0	0	0	0
hsa-mir-8075	0	0	0	0	0	0	0	0	0	0	0	0	0	0	0	0	0	0	0	0	0	0	0	0	0	0	0	0	0	0	0	0	0	0	0	0	0	0	0	0	0	0	0	0	0	0	0	0	0
hsa-mir-8076	0	0	0	0	0	0	0	0	0	0	0	0	0	0	0	0	0	0	0	0	0	0	0	0	0	0	0	0	0	0	0	0	0	0	0	0	0	0	0	0	0	0	0	0	0	0	0	0	0
hsa-mir-8077	0	0	0	0	0	0	0	0	0	0	0	0	0	0	0	0	0	0	0	0	0	0	0	0	0	0	0	0	0	0	0	0	0	0	0	0	0	0	0	0	0	0	0	0	0	0	0	0	0
hsa-mir-8078	0	0	0	0	0	0	0	0	0	0	0	0	0	0	0	0	0	0	0	0	0	0	0	0	0	0	0	0	0	0	0	0	0	0	0	0	0	0	0	0	0	0	0	0	0	0	0	0	0
hsa-mir-8079	0	0	0	0.429697	0	0	0	0	0	0	0	0	0	0	0	0	0	0	0	0	0	0	0	0	0	0	0	0	0	0	0	0	0	0	0	0	0	0	0	0	0	0	0	0	0	0	0	0	0
hsa-mir-8080	0	0	0	0	0	0	0	0	0	0	0	0	0	0	0	0	0	0	0	0	0	0	0	0	0	0	0	0	0	0	0	0	0	0	0	0	0	0	0	0	0	0	0	0	0	0	0	0	0
hsa-mir-8081	0	0	0	0	0	0	0	0	0	0	0	0	0	0	0	0	0	0	0	0	0	0	0	0	0	0	0	0	0	0	0	0	0	0	0	0	0	0	0	0	0	0	0	0	0	0	0	0	0
hsa-mir-8082	0	0	0	0	0	0	0	0	0	0	0	0	0	0	0	0	0	0	0	0	0	0	0	0	0	0	0	0	0	0	0	0	0	0	0	0	0	0	0	0	0	0	0	0	0	0	0	0	0
hsa-mir-8083	0	0	0	0	0	0	0	0	0	0	0	0	0	0	0	0	0	0	0	0	0	0	0	0	0	0	0	0	0	0	0	0	0	0	0	0	0	0	0	0	0	0	0	0	0	0	0	0	0
hsa-mir-8084	0	0	0	0	0	0	0	0	0	0	0	0	0	0	0	0	0	0	0	0	0	0	0	0	0	0	0	0	0	0	0	0	0	0	0	0	0	0	0	0	0	0	0	0	0	0	0	0	0
hsa-mir-8085	0	0	0	0	0.273647	0	0	0	0	0.712084	0	0	0	0	0.726588	0	0	0	0	0	0	0	0	0	0	0	0	0	0	0	0	0	0	0	0	0	0	0	0	0	0	0	0	0	0	0	0	0	0
hsa-mir-8086	0	0	0	0	0	0	0	0	0	0	0	0	0	0	0	0	0	0	0	0	0	0	0	0	0	0	0	0	0	0	0	0	0	0	0	0	0	0	0	0	0	0	0	0	0	0	0	0	0
hsa-mir-8087	0	0	0	0	0	0	0	0	0	0	0	0	0	0	0	0	0	0	0	0	0	0	0	0	0	0	0	0	0	0	0	0	0	0	0	0	0	0	0	0	0	0	0	0	0	0	0	0	0
hsa-mir-8088	0	0	0	0	0	0	0	0	0	0	0	0	0	0	0	0	0	0	0	0	0	0	0	0	0	0	0	0	0	0	0	0	0	0	0	0	0	0	0	0	0	0	0	0	0	0	0	0	0
hsa-mir-8089	0	0	0	0	0	0	0	0	0	0	0	0	0	0	0	0	0	0	0	0	0	0	0	0	0	0	0	0	0	0	0	0	0	0	0	0	0	0	0	0	0	0	0	0	0	0	0	0	0
hsa-mir-8485	0	0	0	0	0	0	0	0	0	0	0	0	0	0	0	0	0	0	0	0	0	0	0	0	0	0	0	0	0	0	0	0	0	0	0	0	0	0	0	0	0	0	0	0	0	0	0	0	0
hsa-mir-873	0.386867	0	1.06932	0	0.273647	0.237715	0.126884	0	0	0	0	0	0	0.751135	0	0	0	0	0	0	0	0	0	0	0	0	0	0	0	0	2.38873	0	0	0.336305	0.41223	0	0.647008	0	0	0	0	0	0	0.994435	0.263288	0	0.365581	0	0
hsa-mir-874	4.13814	3.48169	5.71773	5.3042	4.36687	4.6543	4.01575	5.84591	4.58601	5.01214	3.89572	2.49571	4.49184	4.00257	3.67638	3.65474	4.66117	4.61573	3.10873	3.5209	1.77109	2.70771	3.13542	5.15177	3.75308	3.77635	4.16514	3.43662	2.98521	2.36334	5.3259	3.97348	4.03698	5.35413	3.91232	5.22736	5.37047	3.74662	4.15538	5.67318	4.43096	5.30345	4.73676	6.32884	2.92732	3.49633	4.68943	4.92471	5.43402
hsa-mir-875	0	0	0	0	0	0	0	0	0	0	0	0	0	0	0	0	0	0	0	0	0	0	0	0.578763	0	0	0	0	0	0	0	0	0	0	0	0	0	0.221121	0	0	0	0	0	0.412258	0	0	0	0	0
hsa-mir-876	0	0	0.286513	0	0	0	0	0	0	0	0	0.367374	0	0	0	0	0	0	0	0	0	0	0	0	0	0	0	0	0.290631	0	0.406994	0.627385	0	0	0.220789	0	0	0.221121	0	0	0	0	0.290608	0	0	0.114074	0	0	0
hsa-mir-877	2.5658	0.746801	2.30871	2.04354	2.90201	1.88239	1.84892	1.92444	2.15465	1.54325	1.08798	0	1.48111	0.751135	2.09545	1.40946	0	2.73912	3.01462	0.473115	0	1.79037	0	1.79404	0.462865	1.64018	1.42977	1.39939	0.739437	1.96418	2.38873	2.09375	0	3.19189	1.49522	0.486129	1.86431	0.581993	1.78778	0.577625	0.866159	0.849514	3.57708	1.72917	0.678643	0.41047	0.194339	1.55767	2.85575
hsa-mir-885	0	0.293986	0.525446	0	0	0	0	0	0	0	0	0	0.675559	0	1.20754	0	0	2.08535	0	0.473115	0	0	0.572121	0	0.462865	0.770352	0	0	0	0.500352	0.724074	0	0	0.336305	0.41223	1.5866	0	0.412811	0	0.373436	0.578873	0.341756	0	0.412258	0	0.114074	0.657	0.282115	0.565507
hsa-mir-887	2.02698	2.52268	3.2582	2.85701	2.2508	2.45367	2.21765	2.32023	2.62736	2.4508	2.46023	1.73119	1.48111	2.35013	2.48105	2.19813	2.23482	2.5523	0.627355	1.89403	1.77109	1.79037	0.980694	1.31075	1.86708	2.57041	1.82418	1.39939	2.0442	2.10985	2.55797	1.39741	0	2.7033	3.40483	3.43519	2.6512	2.45213	3.36257	2.33274	2.89101	3.44494	3.31125	2.99025	1.13833	2.15567	2.84812	3.0606	2.80712
hsa-mir-888	0	0	0	0	0	0	0	0	0	0	0	0	0	0	0	0	0	0	0	0	0	0	0	0	0	0	0	0	0	0	0	0	0.59822	0	0	0	0.647008	0	0.232909	0	0	0	0	0	0	0	0.365581	0	0.310287
hsa-mir-889	4.45375	5.36569	4.70291	3.27408	4.97698	4.21367	3.67329	4.37649	4.36211	4.02822	5.16585	4.6645	3.99371	5.01896	4.45622	3.68602	3.54958	5.06341	3.92248	4.77563	3.29985	4.64245	4.54773	3.62668	4.69856	4.2741	4.02205	3.13423	4.93933	3.5064	4.29112	4.36537	2.8412	3.64971	5.08359	4.28032	2.60721	3.26502	3.78553	4.48347	3.58803	3.29585	4.55696	3.40493	3.37989	3.81583	3.94673	3.91059	4.3699
hsa-mir-890	0	0	0	0	0	0	0	0	0	0	0	0	0	0	0	0	0	0	0	0	0	0	0	0	0	0	0	0	0	0	0	0	0	0	0	0	0	0	0	0	0	0	0	0	0	0	0	0	0
hsa-mir-891a	0	0.293986	2.69871	1.45141	0.503572	0.237715	0.745461	1.13635	2.98281	0.712084	3.21032	3.40192	0.675559	0.751135	1.56762	1.80098	1.7955	0	0	2.16766	0	3.66453	0	2.44417	1.70914	0.770352	2.60458	1.95097	0	2.24215	1.71433	0	4.03698	3.10652	3.33562	0.84909	4.56296	0.581993	2.37986	1.57025	1.65044	0.617859	0.739388	0	0.263288	1.49065	1.00676	0.898329	0.310287
hsa-mir-891b	0	0	0	0	0	0	0.126884	0	0	0	0	0	0	0	0	0	0	0	0	0	0	0	0	0	0	0	0	0	0	0	0	0	0	0	0	0	0.46182	0	0	0	0	0.341756	0	0	0	0	0	0	0
hsa-mir-892a	0	0	0	0	0	0	0	0	0	0	0	0	0	0	0	0	0	0	0	0	0	0	0	0	0	0	0	0	0	0	0	0	0	0	0.41223	0	0.46182	0	0	0	0	0	0	0.412258	0	0	0	0.282115	0.310287
hsa-mir-892b	0	0	0	0	0	0	0	0	0	0	0	0	0	0	0	0	0	0	0	0	0	0	0	0	0	0	0	0	0	0	0	0	0	0	0	0	0	0	0.232909	0	0	0	0	0	0	0	0	0	0
hsa-mir-892c	0	0	0	0	0	0	0	0	0	0	0	0	0	0	0	0	0	0	0	0	0	0	0	0	0	0	0	0	0	0	0	0	0	0	0	0	0	0	0	0	0	0	0	0	0	0	0	0	0
hsa-mir-9-1	5.92279	5.98085	5.5247	6.12301	7.05528	5.51102	7.30174	7.52145	7.05908	4.65824	7.69619	10.6887	6.53871	6.76729	6.41716	8.09235	8.13699	4.83654	5.14233	8.5968	6.83816	7.00287	11.0042	11.5132	8.12037	6.02719	9.75791	8.87731	5.44713	7.37499	7.82775	6.99921	5.48146	5.64648	6.66363	8.42704	6.17979	9.52441	6.94593	11.9189	8.23596	8.38509	6.4889	7.15216	5.27947	7.41011	8.92465	10.3649	6.60676
hsa-mir-9-2	5.71887	5.83425	5.69344	6.02649	7.04846	5.4354	7.33925	7.44415	6.95586	5.12197	7.7066	10.7119	6.81608	6.8465	6.33764	8.09235	8.10282	5.19698	5.36842	8.56166	6.84826	7.10948	11.0259	11.5086	8.06439	5.84436	9.76635	8.90838	5.38684	7.60128	7.95447	7.16719	5.46477	5.42636	6.59124	8.43708	6.15709	9.52409	6.95206	11.9381	8.26943	8.35714	6.36938	7.02602	5.24941	7.3989	8.96767	10.3867	6.68958
hsa-mir-920	0	0	0	0	0	0	0	0	0	0	0	0	0	0	0	0	0	0	0	0	0	0	0	0	0	0	0	0	0	0	0	0	0	0	0	0	0	0	0	0	0	0	0	0	0	0	0	0	0
hsa-mir-921	0	0	0	0	0	0	0	0	0	0	0	0	0	0	0	0	0	0	0	0	0	0	0	0	0	0	0	0	0	0	0	0	0	0	0	0	0	0	0	0	0	0	0	0	0	0	0	0	0
hsa-mir-922	0	0	0	0	0	0.237715	0	0	0	0	0	0	0	0	0	0	0	0	0	0	0	0	0	0	0	0	0	0	0	0	0	0	0	0.336305	0	0	0	0	0	0	0	0	0	0	0	0	0	0	0
hsa-mir-924	0	0	0	0	0	0	0	0	0	0	0	0	0	0	0	0	0	0	0	0	0	0	0	0	0	0	0	0	0	0	0	0	0	0	0	0	0	0	0	0	0	0	0	0	0	0	0	0	0
hsa-mir-92a-1	13.4186	11.4754	12.4174	14.9853	12.4334	14.1631	11.5586	12.4799	11.9244	12.036	11.3338	10.8132	11.4522	11.4479	11.7178	10.6981	11.4131	12.7799	12.4675	11.1832	13.194	12.3484	10.8748	12.2811	11.8087	12.1558	11.7756	11.2694	11.1204	11.6523	12.8754	10.7053	12.9173	12.3723	12.4448	12.0885	12.0881	11.2427	13.5085	11.2715	11.6611	11.6028	11.99	11.6523	10.2786	10.2674	12.0876	12.9918	12.4777
hsa-mir-92a-2	13.2954	11.3484	12.3596	14.8796	12.3018	13.9736	11.4007	12.3635	11.8329	11.9634	11.1895	10.6966	11.3476	11.3288	11.6001	10.6406	11.3929	12.7311	12.2869	11.0483	13.0768	12.1983	10.7231	12.1979	11.7531	12.0511	11.6622	11.1763	11.0386	11.6202	12.7853	10.5983	12.8104	12.2994	12.4003	11.9847	11.9817	11.1311	13.4461	11.1637	11.6003	11.4932	11.9136	11.5163	10.1946	10.1799	11.9947	12.8664	12.4041
hsa-mir-92b	8.91108	5.31745	7.82413	7.44401	6.64686	5.66156	5.0039	6.72582	6.19977	6.35839	6.39113	4.50781	5.4397	5.54747	6.29015	5.70243	5.88453	7.4871	6.92345	5.35666	5.05202	7.43573	2.66762	7.70933	6.57275	8.09111	6.88129	6.99467	4.61078	5.14602	5.75822	5.91598	6.06118	6.89961	5.84691	5.63468	7.02687	5.8941	6.4021	5.81115	6.8126	5.50371	6.65145	5.56399	4.83941	5.44422	5.85337	6.79914	7.12115
hsa-mir-93	13.3332	12.3377	11.6587	12.0599	13.4016	13.0592	11.595	12.4597	11.9814	12.3551	10.9326	10.4628	12.3419	11.8413	11.8177	12.0516	11.1189	12.7368	12.1726	10.9041	12.4148	12.5463	9.51864	12.1191	11.9181	13.0602	12.3011	11.8661	11.3023	11.989	12.2235	10.8672	11.9694	12.1638	11.7795	10.7348	12.5315	10.1683	12.5611	11.1427	10.1073	10.7689	11.4136	10.6622	9.286	10.9605	10.7055	12.0579	11.6869
hsa-mir-9-3	5.93735	5.91753	5.62444	6.03415	7.11301	5.39298	7.36786	7.43918	7.05284	5.14817	7.80671	10.6981	6.61979	6.86352	6.42817	8.05839	8.11144	4.70815	5.53021	8.5968	6.78653	7.18456	11.0086	11.5289	8.13598	5.94694	9.73658	8.93155	5.43973	7.52215	7.87257	7.10004	5.32382	5.60817	6.63271	8.46024	6.11452	9.49723	7.05069	11.923	8.30289	8.39772	6.43038	7.04421	5.34489	7.4309	8.90525	10.4008	6.56349
hsa-mir-933	0	0	0	0	0	0	0	0	0	0	0	0	0	0	0	0	0	0	0	0	0	0	0	0	0	0	0	0	0	0	0	0	0	0	0	0	0	0	0	0	0	0	0	0	0	0	0	0	0
hsa-mir-934	1.34355	0	0	0	1.80996	1.38522	0.229065	2.76373	2.62736	0	0	0	6.75357	0	0	1.40946	0	0	0	0	0	0	0.572121	1.57254	0	0	0	0	0.532417	0	0	0	0	0	0.220789	0	0	0.221121	0.433392	0.756464	0.990857	0	0.290608	0.412258	0	0	0.657	0	0
hsa-mir-935	4.41267	0	4.91737	4.49256	1.52594	0.620465	1.57761	2.76373	2.62736	2.4508	0	1.59933	0	4.28126	3.24965	3.41444	2.57113	0	4.43961	0.828799	3.87523	4.84117	0	2.68465	4.51979	6.23068	5.28969	3.89939	1.69231	3.08101	5.17789	4.73356	5.51427	5.2183	1.72909	0.678994	0.46182	0.221121	4.03719	2.65942	0.410474	1.22434	3.84693	0.732515	0.485863	0.497126	0.783247	1.7552	4.60143
hsa-mir-936	0	0	0	0	0	0	0	0	0	0	0	0	0	0	0	0	0	0	0	0	0	0	0	0	0	0	0	0	0	0	0	0	0	0	0	0	0	0	0	0	0	0	0	0	0	0	0	0	0
hsa-mir-937	1.91378	0.293986	2.64905	1.25569	1.03161	1.73492	0.600484	1.2618	1.95501	1.18672	0.459696	0	0.675559	1.90013	0	2.28241	1.95727	3.80479	2.91395	0.828799	1.38336	1.79037	0.572121	2.44417	2.56501	3.77635	1.42977	2.34901	2.66816	2.85168	1.85094	1.89678	2.61788	1.85806	0.869361	0	0.811106	0	2.90352	1.30869	0.219786	0.341756	2.12013	0	0	0.656229	0.783247	2.57712	0.970717
hsa-mir-938	0	0	0	0	0	0	0.111221	0	0	0	0	0	0	0	0	0	0	0	0	0	0	0	0	0	0	0	0	0	0	0	0	0	0	0	0	0	0	0	0	0	0	0	0	0	0	0	0	0	0
hsa-mir-939	1.50858	0.293986	1.77255	1.77764	0.701841	0.620465	0.745461	0	0	0.712084	0	0.367374	1.13385	0	0.726588	0.634248	0	1.7794	0.627355	0	0	0	0.572121	1.31075	0.812745	2.73237	1.42977	1.15603	0.532417	1.41047	1.85094	1.06317	2.02966	1.85806	1.49522	1.00123	1.32718	0.870418	0.907669	1.05884	0.410474	0.617859	0.920387	0.732515	0	0.114074	1.00676	1.84467	1.54579
[truncated: 15 more rows]
[truncated: 428 more columns]

## Sheet: S4.2
Table S4.2 Clinical details of 436 patients with miRNA-188 expression in TCGA-STAD
[truncated: 437 more rows]
[truncated: 42 more columns]

## Sheet: S4.3
	Table S4.3 Details of factors incorporated into univariate cox regression
id	futime	fustat	miRNA-188
TCGA-BR-6710-01	21	0	2.40351
TCGA-IN-A6RI-01	559	0	3.31517
TCGA-VQ-A8DV-01	403	1	3.65216
TCGA-FP-8209-01	1811	1	0.777524
[truncated: 375 more rows]
